# Supplementary material for: Distinct Cellular Origins and Differentiation Process Account for Distinct Oncogenic and Clinical Behaviors of Leiomyosarcomas
Source: Cancers (Basel). 2023 Jan 15;15(2):534. doi: 10.3390/cancers15020534 (PMC9856933; doi:10.3390/cancers15020534)
Supplement: Supplementary file 1 [file cancers-15-00534-s001.zip]

Archive with 8 entries (8 files):
- FigureSupps.pdf
- File_S1.pdf
- TS1.xlsx
- TS2.xlsx
- TS_3.xlsx
- TS_4.xlsx
- TS_5.xlsx
- TS_6.xlsx
