# Supplementary material for: Distinct Cellular Origins and Differentiation Process Account for Distinct Oncogenic and Clinical Behaviors of Leiomyosarcomas
Source: Cancers (Basel). 2023 Jan 15;15(2):534. doi: 10.3390/cancers15020534 (PMC9856933; doi:10.3390/cancers15020534)
Supplement: Supplementary file 1 [file cancers-15-00534-s001.zip › TS_4.xlsx]

## Sheet: TS4A DE t-test - mRNA
Supplementary Table S4A: Results of differential gene expression analyses in Affymetrix, ICGC and TCGA cohorts
Columns description: SYMBOL: gene official gene symbol; signature: black if the ge was used to compute the centroid signature, white otherwise; t-test adjusted: -log10 of t-test p-values adjusted for multi-testing with Holm's method;
t-score: result of t-test; variance: variance of gene expression in each LMS group (hLMS and oLMS); median: gene expression median with each LMS group (hLMS and oLMS)
			Affymetrix							ICGC							TCGA
SYMBOL	signature		t-test adjusted	t-score	variance hLMS	variance oLMS	median hLMS	median oLMS		t-test adjusted	t-score	variance hLMS	variance oLMS	median hLMS	median oLMS		t-test adjusted	t-score	variance hLMS	variance oLMS	median hLMS	median oLMS
A1BG	0		0	-3.01683	0.000950921	0.230339	2.13894	2.13636		0	0.730042	0.694938	0.809823	2.31731	2.20262		0	-0.565887	1.41372	3.9511	7.296	7.2655
A1CF	0		0	-2.09412	0.00260836	0.00368796	2.92494	2.9478		0	-0.691938	0.0110824	0.00789898	0.15375	0.177223		0	-0.913092	0.17481	0.274466	0	0
A2M	1		14.5904	11.6555	0.50116	1.75756	13.7727	11.4935		1.17856	6.49807	0.287014	0.817923	8.8482	6.81402		2.25667	6.53685	0.515578	2.5829	16.332	13.7889
A2ML1	0		0	-1.61809	0.00271994	0.00539052	2.69981	2.7068		0	0.417218	0.0511243	0.0303601	0.359975	0.343103		0	2.5634	1.73177	1.03736	0.8383	0
A4GALT	0		0	2.65654	0.148476	0.114609	6.38176	6.13306		0	4.40949	0.351172	0.636392	4.24328	2.88888		0.201639	4.83642	0.502436	1.63462	10.8843	9.0659
A4GNT	0		0	0.725203	6.77434e-05	0.000102878	1.8633	1.86055		0	0.410318	0.093087	0.061059	0.500925	0.466044		0.21405	4.8467	0.843903	0.189311	1.5277	0.58905
AAAS	0		0	-2.57484	0.32318	0.19023	6.1949	6.56712		0	0.323679	0.110271	0.130148	4.67804	4.52628		0	-2.27307	0.264386	0.206402	9.4811	9.6626
AACS	0		0	-0.440011	0.409086	0.628294	8.05121	8.00341		0	0.469987	0.144641	0.461031	2.76638	2.78451		0	-0.710181	0.158977	0.330489	8.8156	9.16085
AADAC	0		0	-1.00668	9.99555e-05	0.04559	2.24557	2.24563		0	-0.00621093	0.157141	0.614684	0.195501	0.169459		0	-0.915808	0.45441	0.810281	0	0
AADACL2	0		0	-1.6147	0.000462372	0.723	2.54856	2.5565		0	-0.910665	0.115241	1.05991	0.16964	0.178119		0	-1.62556	0.0158892	0.139041	0	0
AADAT	0		0	-3.83131	0.186288	0.71321	5.98959	6.29542		0	-1.68932	0.206379	0.307843	2.30521	2.62499		0	-0.832321	0.376351	0.889696	6.4101	6.80715
AAGAB	0		0	-3.42795	0.608756	0.544614	7.01657	7.27238		0	-2.04542	0.179092	0.172512	3.845	4.20978		0	-2.85359	0.12495	0.271839	9.4612	9.8931
AAK1	0		0	-2.911	0.493502	0.415169	9.0451	9.27596		0	-3.75102	0.0995116	0.106083	2.97957	3.33494		0	-1.14484	0.262112	0.279783	10.0205	10.0231
AAMP	0		0	-1.69341	0.256683	0.528403	8.01684	8.07413		0	0.39355	0.118748	0.207577	5.182	4.81211		0	-0.0182195	0.151435	0.163372	11.1117	10.9617
AANAT	0		0	0.905818	4.69379e-05	2.4158e-05	2.01801	2.01748		0	0.0426157	0.064367	0.0514039	0.404315	0.429004		0	-1.58162	0.211181	0.480863	0	0.7161
AARS	0		0	-2.17394	0.295922	0.295516	9.82997	10.0201		0	-2.25143	0.248549	0.126301	5.1939	5.33946		0	-0.354634	0.415717	0.291571	11.6172	11.7579
AARS2	0		0	-3.77715	0.466895	0.756783	7.25024	7.98648		0	-1.538	0.164174	0.105923	3.03201	3.32625		0	-2.23525	0.227914	0.636846	8.794	8.9665
AARSD1	0		0.146275	4.22761	0.5132	0.818123	7.1006	6.43942		0	0.857337	0.146154	0.15679	3.77283	3.65377		0	3.03228	0.187499	0.431323	9.9441	9.2508
AASDH	0		0	-3.25651	0.422546	0.649958	5.95025	6.27605		0	-0.504953	0.123475	0.113353	3.34401	3.4926		0	0.573998	0.219854	0.356124	7.7588	7.62855
AASDHPPT	0		0	-2.259	0.586004	0.398521	9.15961	9.30857		0	-0.566004	0.123773	0.441989	4.0359	3.87218		0	-2.54321	0.123561	0.369017	8.8775	9.3866
AASS	0		0	-2.66312	0.427307	0.772883	4.24931	4.51541		0	-0.668402	0.390277	0.202241	3.86039	4.04267		0	0.930464	0.730679	1.14169	8.9675	8.5556
AATF	0		0	3.62661	0.257296	0.270493	8.23333	7.92967		0	0.640274	0.11697	0.148268	4.47334	4.42479		0	-0.567917	0.132866	1.05585	10.5775	10.2066
AATK	0		0	-3.1031	0.331038	0.539588	5.16847	5.49035		0	-1.48573	0.260205	0.0602552	0.643546	0.998896		0	-1.18489	2.51061	0.874514	5.3403	5.96295
ABAT	0		0	1.85981	1.24783	0.854125	6.50013	6.21832		0	1.49514	0.262788	0.120207	1.82593	1.63361		0	3.00495	0.603278	1.87395	7.2133	6.064
ABCA1	0		0	-1.74602	1.06228	1.42873	8.85977	9.06227		0	-3.44555	0.533342	1.00424	4.1429	5.29765		0	-2.29777	0.733521	0.825484	9.2182	9.79
ABCA12	0		0	-0.620485	0.000274819	0.00073917	2.47967	2.48046		0	1.06353	0.279022	0.157695	0.741806	0.579214		0	2.95574	1.8143	1.38251	2.1803	1.24755
ABCA13	0		0	-1.62836	0.00483219	1.49738	2.90616	2.93537		0	-2.56149	0.00435167	1.90564	0.143724	0.825432		0	-4.55442	1.91237	4.10774	0.8155	3.72675
ABCA2	0		0	-0.291486	0.190212	0.252755	2.8637	2.87297		0	1.74862	0.179852	0.46935	3.41973	3.05451		0	2.20381	0.452839	1.8382	10.7128	10.1738
ABCA3	0		0	3.11747	0.765792	0.45949	3.76729	3.17875		0	4.72715	0.271594	0.408402	2.22463	1.1344		0.331757	4.94405	1.4635	2.04071	9.0985	6.9316
ABCA4	0		0	-1.14639	8.41167e-05	0.0323827	2.10936	2.1124		0	-0.926915	0.0621368	0.115894	0.269724	0.388043		0	0.318772	1.43645	3.82098	3.6118	2.9469
ABCA5	0		0	0.293804	2.21073	2.03958	6.81058	6.30181		0	1.12279	0.706894	1.06665	3.37803	2.82547		0	1.05054	3.94672	3.95176	7.3373	6.21
ABCA6	0		0.876889	-4.82842	0.142962	3.62275	2.56269	2.84111		0	-2.19696	0.73636	3.83947	1.03764	2.10878		0	-0.837835	3.55938	7.30541	4.5302	4.19345
ABCA7	0		0	0.608835	0.392576	0.548166	3.97642	3.96071		0	0.184682	0.430296	0.257303	1.95442	1.89649		0	0.764791	1.32519	1.13661	8.3993	7.9617
ABCA8	0		0	-1.04556	5.79667	12.791	5.89225	6.64246		0	0.289734	1.37519	3.66585	2.33593	0.968503		0	2.16457	5.25749	8.27174	6.4408	3.86485
ABCA9	0		0.28192	-4.46591	0.0317257	4.92687	3.12488	3.22104		0	-2.18766	0.266163	2.78484	1.41116	1.81646		0	-0.398177	2.49984	6.85699	3.7179	3.15305
ABCB1	0		0	-0.826198	1.23928	2.68214	3.34362	3.48307		0	-0.022907	0.872103	0.621222	0.972454	1.24511		0	1.3165	3.99049	5.60165	5.9227	5.42085
ABCB10	1		9.03286	8.80141	0.455559	0.991253	8.30239	6.84951		3.28282	9.13774	0.130503	0.123532	4.58087	3.32787		5.96835	9.85314	0.24293	0.236572	9.6045	8.4035
ABCB11	0		0	-1.5153	0.000155101	0.000177462	2.42703	2.42852		0	-1.31193	0.000627949	0.134317	0.0138669	0.00715266		0	0.316588	0.153235	0.196051	0	0
ABCB4	0		0	-1.12144	0.382122	1.78128	2.24421	2.24368		0	-1.33948	0.494127	1.35737	1.354	1.43269		0	0.903206	3.44511	4.13255	5.5902	4.5927
ABCB5	0		0	2.82556	15.4642	7.47028	4.14303	2.72458		0	1.02373	5.78931	3.8905	3.93847	2.83317		0	4.16267	13.6132	4.15316	6.352	3.1538
ABCB6	0		0	-1.32864	1.02301	1.42298	5.97599	6.43857		0	-0.429225	0.238347	0.107924	3.23395	3.33842		0	-1.02229	0.443271	0.30909	9.387	9.71725
ABCB7	0		0	3.56463	0.280124	0.242186	8.19443	7.86076		0	3.65409	0.0554339	0.0747541	4.2208	3.87719		0	0.0644325	0.136919	0.278114	8.9784	9.1511
ABCB8	0		0	-0.30322	0.309756	0.41674	2.78256	2.82647		0	-2.81689	0.134302	0.167461	2.90402	3.27547		0	-4.62858	0.238468	0.317113	9.1145	9.77525
ABCB9	0		0	-0.357686	0.168936	0.159832	6.02985	6.12582		0	2.88575	0.205366	0.337533	2.0642	1.32025		0	1.1931	0.317407	1.08417	7.3927	6.9459
ABCC1	0		0	0.217908	0.602083	0.322752	8.37666	8.28209		0	-1.72608	0.143074	0.331836	3.4662	3.59033		0	0.810975	0.30973	0.214448	10.38	10.1401
ABCC10	1		2.06262	-5.36566	0.790957	0.903616	6.7169	7.64104		0	-4.82257	0.140727	0.0884912	2.60602	3.12223		0.755383	-5.29439	0.180117	0.282329	8.5835	9.14225
ABCC11	0		0	-1.36682	0.000118059	9.15092e-05	2.50293	2.50739		0	-2.01388	0.00278794	0.00308622	0.0369594	0.0718036		0	-0.954186	0.438699	0.669445	0.5301	1.1883
ABCC12	0		0	-1.59682	0.000113024	0.987197	2.09132	2.09278		0	-1.33897	1.64681e-05	0.00177495	0	0		0	-2.25293	0.0117313	4.58508	0	0
ABCC2	0		0	-1.93466	0.000229855	0.425474	2.19512	2.20213		0	-0.424107	0.0873925	0.159197	0.562604	0.571569		0	0.911441	0.814073	3.46322	3.6094	3.1495
ABCC3	0		0	1.15026	0.771098	0.72302	5.2645	5.02354		0	0.715369	1.18802	0.413247	2.02479	1.69883		0	1.48755	2.62498	2.64795	7.5978	7.2522
ABCC4	0		0	-2.20361	1.70439	3.85545	5.65005	6.96106		0	-3.02007	0.495482	0.780964	2.79428	3.57		0	-0.442984	1.36089	3.14718	7.8761	8.26095
ABCC5	0		0	-1.92605	0.38128	0.779933	6.46672	6.88472		0	-3.74174	0.057795	0.235663	4.17123	4.55895		0	-0.373055	0.243475	0.556525	9.3628	9.6874
ABCC6	0		0	3.52597	4.16117	3.96341	5.33557	2.64634		0	4.23249	0.466153	1.14478	2.47782	0.729568		0	4.50046	3.92701	2.19759	5.4387	3.45585
ABCC8	0		0	0.261569	0.143963	0.193652	2.81668	2.82045		0	5.12949	1.56016	0.0184415	1.0513	0.0208995		0.184314	4.82207	7.76985	2.87918	4.0606	0.97555
ABCC9	1		7.07919	8.3047	2.19829	1.05876	5.01669	2.44254		0	4.23863	0.223068	0.111354	5.68173	5.01061		4.21713	8.22528	0.794798	2.63933	10.5638	6.9426
ABCD1	0		0	2.30328	0.776815	0.376135	4.81161	4.7335		0	0.649768	0.422245	0.280959	3.15353	3.17635		0	2.19513	0.602296	0.841111	9.7299	9.0721
ABCD2	0		0	1.07444	0.0016508	0.00117887	2.40463	2.4018		0	-0.346149	0.358274	0.565385	0.983883	0.869797		0	1.56863	4.35121	4.53545	4.2247	3.7324
ABCD3	0		0	7.75402e-05	0.335174	0.404977	9.92959	9.9679		0	-0.195234	0.178074	0.348828	4.87344	4.69845		0	1.49424	0.140685	0.403861	9.8471	9.60565
ABCD4	0		0	-3.48031	0.25902	0.434921	7.70907	8.02569		0	-4.04926	0.0966067	0.0799043	3.12567	3.50052		0	-4.43934	0.268908	0.25689	8.8963	9.5344
ABCE1	0		0.364417	-4.36929	0.388603	0.498878	9.25361	9.69377		0	-3.81174	0.0952412	0.209914	4.59119	5.24087		0	-3.60532	0.154104	0.411417	9.9427	10.5401
ABCF1	0		0	-3.34608	0.394579	0.452761	8.57048	9.11956		0	-3.73725	0.144253	0.102246	4.26017	4.64066		0	-1.35893	0.239435	0.331294	11.0383	11.1151
ABCF2	0		0	-2.28959	0.627192	0.668197	7.33298	7.49316		0	-1.44809	0.100876	0.301247	3.97728	4.31029		0	-4.62449	0.184207	0.14286	10.1303	10.5887
ABCF3	0		0.244575	-4.28886	0.245009	0.465257	6.15756	6.65992		0	-2.1923	0.0539874	0.236503	3.97784	4.16057		0.249155	-4.87557	0.114409	0.212262	9.5714	10.1411
ABCG1	0		0	-3.44173	2.41451	3.02634	4.99539	6.70796		0	-3.37369	0.550493	0.5736	2.32188	3.28841		0	-2.34649	1.42167	0.976362	7.9095	8.384
ABCG2	0		0	-0.420055	0.992912	0.951261	2.22519	2.221		0	1.45529	0.241725	1.00883	1.93895	1.25215		0	3.07089	0.682224	2.77614	6.8047	5.4334
ABCG4	0		0	-0.714086	0.0377287	0.0531999	2.49739	2.50956		0	-1.39188	0.0358403	0.0326775	0.079271	0.191208		0	-0.548137	1.47211	1.41071	2.6993	2.59115
ABCG5	0		0	-1.39592	0.000142393	0.0761345	2.39481	2.39738		0	-0.993521	0.0167425	0.259916	0.109418	0.110511		0	-0.245667	0.631667	0.870219	0.8396	1.21325
ABCG8	0		0	-0.106269	7.25498e-05	0.000187092	2.157	2.16033		0	-1.26412	0.00139922	0.0359354	0.0291365	0.0543452		0	-0.214821	0.248764	0.142114	0	0
ABHD1	0		0	-0.770981	0.0151765	0.0805757	2.29454	2.30037		0	3.40788	0.287629	0.0906462	1.57199	1.10491		0	4.46319	2.36745	1.21901	3.7202	2.0839
ABHD10	0		0	-2.92408	0.383661	0.497454	7.44948	7.83823		0	-0.533422	0.158264	0.182253	3.84308	3.95018		0	-1.40383	0.213114	0.161142	8.8906	9.12775
ABHD11	0		0	0.960698	0.581857	0.748293	6.29292	6.16616		0	-0.141706	0.102652	0.108527	3.23697	3.2538		0	-1.18045	0.3101	0.255469	7.887	8.06985
ABHD12	0		0	-2.50511	0.361859	0.442984	8.3562	8.70136		0	-1.09648	0.141314	0.37095	4.64933	4.88714		0	-2.47178	0.292703	0.452628	10.3028	10.8269
ABHD12B	0		0	-1.44376	0.00556084	0.326934	2.99014	3.0331		0	-0.846182	0.0968797	0.138406	0.77544	0.809581		0	-1.17007	0.718426	3.34612	1.3559	1.22185
ABHD13	0		0	0.138224	0.57777	0.287715	3.78544	3.92931		0	-0.637242	0.15227	0.120535	2.9505	3.10804		0	-1.1602	0.232311	0.292145	8.2497	8.52185
ABHD14A	0		0	-2.92654	0.664817	1.12856	6.00306	6.61893		0	0.587451	0.111472	0.390373	3.30248	3.05104		0	-1.81169	0.340703	0.415028	7.9776	8.33085
ABHD14B	0		0	0.0599822	0.93838	0.948118	7.06391	7.07937		0	2.78381	0.177833	0.222612	4.20276	3.71777		0	1.05097	0.295794	0.542949	10.1505	9.7434
ABHD15	0		0	0.431189	0.520214	0.408432	5.27101	5.13533		0	-0.363439	0.209545	0.1187	3.23153	3.12767		0	1.40008	0.213264	0.362761	8.5962	8.5339
ABHD2	0		0.17875	-4.25815	0.401402	1.17475	7.61577	8.35188		0	-3.02448	0.272386	0.474655	4.81716	5.61607		0	-0.623978	0.217078	0.887817	11.5651	11.4166
ABHD3	0		0	3.97934	0.383778	0.475183	7.99994	7.5004		0	2.02823	0.2797	0.57315	4.17055	3.35376		0	3.43249	0.333812	0.409304	8.6049	7.8192
ABHD4	0		0	0.094254	0.355738	0.39228	7.55079	7.60873		0	0.495911	0.253617	0.655387	4.03478	3.80428		0	1.56649	0.292311	0.689417	10.6747	10.2848
ABHD5	0		0	3.95863	0.986281	1.03231	6.25512	5.08248		0	3.30964	0.440428	0.211275	3.91546	3.27964		0	2.30296	0.501738	0.838989	9.3811	8.65455
ABHD6	0		0	2.52198	0.297966	0.474591	5.00251	4.89497		0	0.0864566	0.120735	0.170669	2.59485	2.47952		0	2.16752	0.250486	0.455095	7.7259	7.4341
ABHD8	0		0	2.01667	0.183446	0.133817	5.77814	5.62434		0	1.27409	0.142834	0.410152	3.47178	3.40494		0	3.11996	0.209103	0.620457	9.288	8.6583
ABI1	0		0	-3.53043	0.640555	0.325916	8.85843	9.44278		0	-2.22395	0.103902	0.182734	4.28455	4.41936		0	-2.40208	0.180225	0.172062	9.6345	10.0197
ABI2	0		0	2.23958	0.454355	0.883718	9.65164	9.17148		0	1.68105	0.147292	0.270591	4.43042	4.0527		0	2.4394	0.174762	0.711795	10.7631	9.88455
ABI3	0		0	-2.63373	0.337301	0.422342	5.07494	5.33726		0	-3.57083	0.321573	0.730974	1.47107	2.59283		0	-4.31184	1.02597	1.67235	7.0245	8.49815
ABI3BP	0		0	1.78913	3.51772	8.87336	10.3485	10.2215		0	3.21075	0.925772	0.928647	4.9544	3.63739		0	2.86778	0.634595	4.5244	11.3479	10.3575
ABL1	0		0	0.324303	0.408749	0.529933	9.17217	9.18231		0	-0.0778709	0.171577	0.200883	5.27684	5.32125		0	3.52072	0.307834	0.58877	12.2125	11.6029
ABL2	1		6.24916	-7.47206	0.520982	1.00461	7.31803	8.52754		0	-5.01592	0.178417	0.231619	3.65052	4.64474		0.438063	-5.03225	0.198272	0.520542	9.4396	10.5245
ABLIM1	0		0	-2.06739	3.4119	3.73487	7.73834	8.20458		0	1.06483	0.797003	1.72716	3.72906	3.44064		0	2.5648	1.12186	2.18536	10.1393	8.88045
ABLIM2	0		0	0.478991	0.787903	1.5994	4.23233	4.10675		0	3.81807	0.620416	0.246798	1.32731	0.590172		0	1.90768	2.98961	4.89859	7.867	5.39985
ABLIM3	0		0	-1.64457	2.38713	2.25488	5.06915	5.95549		0	-1.35292	0.698026	0.650886	3.01173	3.54144		0	0.516547	2.24578	1.75249	10.0728	9.53255
ABO	0		0	-1.78694	0.169656	0.335929	2.84407	2.89359		0	-0.944118	0.0156648	0.0299084	0.0945662	0.078037		0	1.45058	1.03323	1.36063	1.7502	1.1797
ABR	0		1.79075	-5.25556	0.770587	0.604523	7.20285	8.04674		0	-3.86088	0.225122	0.271196	3.92864	4.40603		0	-2.70005	0.605399	0.217919	10.876	11.208
ABRA	0		0	0.548108	2.08494	2.44828	2.79184	2.77171		0	3.75055	0.314946	0.0319253	0.718746	0.293587		0	4.46564	4.85122	6.16152	4.8857	0.7847
ABT1	0		0	-3.51025	0.439487	0.29383	5.74748	6.269		0	-0.549489	0.126812	0.174688	3.3392	3.39787		0	-4.55219	0.205085	0.166541	8.978	9.37145
ABTB1	1		3.84304	6.56387	0.874084	0.364705	6.61035	5.39954		0.119988	5.3203	0.266267	0.225548	4.18524	3.34031		0.140685	4.7856	0.403323	0.763948	10.4381	9.1728
ABTB2	0		0	-3.51778	0.581512	0.815104	3.83926	4.17395		0	0.972933	0.294341	0.218508	1.69972	1.55346		0	-0.572249	0.740294	1.7663	7.3982	7.4995
ACAA1	0		0	-2.9278	0.262745	0.63077	8.71614	9.12326		0	0.495856	0.103177	0.121195	4.09284	3.92172		0	-0.291241	0.302007	0.192494	9.7198	9.79565
ACAA2	0		1.22784	-5.02576	1.51311	0.590828	7.78249	8.80988		0	-1.03836	0.486623	0.413942	4.42278	4.56611		0	-2.14622	0.46631	0.312681	10.0891	10.3826
ACACA	0		0	0.325656	0.40774	0.557507	8.13291	8.07744		0	-1.2307	0.20357	0.112013	3.8131	4.09068		0	0.250471	0.398645	1.06473	10.4647	10.4581
ACACB	0		1.28005	4.90903	1.27877	2.03156	6.99228	5.43931		0	1.5136	0.358085	0.989152	3.19182	2.28109		0	3.2784	0.434184	4.19083	9.7456	7.8967
ACAD10	0		0	-1.78857	0.376475	0.476018	4.73891	5.06328		0	-1.4835	0.132286	0.105017	3.12897	3.24822		0	-0.243447	0.233385	0.271243	8.85	8.9565
ACAD11	0		0	2.53054	0.925596	0.590211	7.59949	6.87931		0	1.99062	0.150802	0.205545	4.50304	4.10374		0	4.56926	0.322083	0.549754	9.0382	8.27185
ACAD8	0		0	-1.06503	1.05115	0.92063	6.00726	5.99247		0	0.0707539	0.106517	0.307039	3.36398	3.24928		0	2.90073	0.262064	0.389937	8.8588	8.44345
ACAD9	0		0	3.32369	0.409025	0.664563	7.51036	6.88419		0	1.23715	0.0521565	0.204029	4.44586	4.13871		0	2.5452	0.0845551	0.307066	10.0382	9.65995
ACADL	0		0	3.94846	3.65788	0.745587	2.46535	2.44617		0	2.31075	1.32215	0.501858	0.570579	0.119194		0	3.78254	8.73365	5.44821	3.5555	0.2416
ACADM	0		0	0.146029	0.127298	0.530048	9.29458	9.21676		0	0.818537	0.176406	0.277536	4.85364	4.61573		0	1.11347	0.203153	0.74162	9.8718	9.61425
ACADS	0		0	0.0546624	0.172303	0.339977	5.19006	5.11965		0	0.975925	0.17166	0.493273	3.55409	3.23546		0	0.246898	0.575854	0.728056	8.9852	8.6295
ACADSB	0		0	-1.38214	1.2191	1.68011	5.79654	6.25641		0	1.70715	0.245607	0.0352715	3.02403	2.7924		0	1.29678	0.566814	0.940738	8.5039	8.21085
ACADVL	0		0	-1.67241	0.413369	0.733894	9.51837	9.80754		0	-0.262532	0.209539	0.248794	5.84042	5.86369		0	-3.12782	0.379918	0.339302	11.7045	12.0251
ACAN	0		0	1.00314	4.6672	5.45666	6.12659	4.81577		0	-0.143907	2.99654	5.07592	3.19024	3.20917		0	1.80666	7.54277	15.1443	10.3446	7.44295
ACAP1	0		0	-0.718424	0.230407	0.355533	4.98892	5.08624		0	-1.66554	0.339937	0.600563	1.70081	1.99077		0	-1.51553	2.93452	4.18235	5.9007	6.3422
ACAP2	0		0	-4.0169	0.255322	0.24575	9.39647	9.7024		0	-0.99795	0.0796582	0.129939	4.58571	4.59685		0	-0.493675	0.15391	0.308061	9.8753	9.91755
ACAP3	0		0	-1.10857	1.22733	1.25909	6.02192	6.08249		0	-1.37443	0.31701	0.208877	3.88809	4.11149		0	-0.815603	0.555612	0.422643	10.1592	10.3839
ACAT1	1		2.11385	5.38283	0.456944	1.11232	9.59228	8.71783		0	2.25248	0.167947	0.774562	5.02919	4.32457		1.08993	5.57042	0.278682	0.32321	10.6233	9.63955
ACAT2	0		0	4.06799	0.776107	0.814405	8.53489	7.90792		0	2.33699	0.23442	0.923618	4.26778	3.56288		0	2.68852	0.35086	0.729108	9.5857	9.2218
ACBD3	0		0	-1.41402	0.342653	0.426769	9.79089	9.91818		0	-1.8647	0.116538	0.147779	4.78237	4.90625		0	-2.56862	0.299294	0.251401	10.088	10.4822
ACBD4	0		0	3.24172	0.385356	0.218529	5.94663	5.73496		2.5461	8.15763	0.299535	0.0682024	3.54019	2.5543		3.13853	7.28275	0.564512	1.01026	9.007	7.01695
ACBD5	0		0	-3.84689	0.408481	0.385388	8.8044	9.37602		0	-2.46028	0.195944	0.14569	3.35807	3.77183		0	-2.948	0.278176	0.468559	8.6276	9.0313
ACBD6	0		0	-0.46684	0.473031	0.544574	7.49841	7.52882		0	1.03672	0.113804	0.081126	4.87539	4.70662		0	-1.53708	0.262716	0.346875	8.9479	9.15655
ACCS	0		0	1.42187	0.575622	0.856947	6.10494	5.82329		0	0.605448	0.243263	0.314689	3.31074	3.2747		0	3.48537	0.5886	0.65115	7.9244	7.0912
ACD	0		0	-1.31282	0.415702	0.639082	7.8526	8.07193		0	-0.684324	0.153851	0.633685	3.0382	3.04006		0	-0.569085	0.375251	0.245294	8.8979	8.93555
ACE	1		2.4686	-5.78597	0.0707036	1.13586	3.2968	3.65909		1.0191	-6.31542	0.538543	0.344555	1.28357	2.76284		0	-3.0695	1.23217	0.721289	7.7471	8.2651
ACE2	0		0	0.899785	0.426471	0.00434755	2.63657	2.64504		0	1.85541	0.790193	0.050893	0.239462	0.0397044		0	4.03502	2.27762	0.627313	2.1894	1.07895
ACER1	0		0	-3.48275	0.000287498	0.00135909	2.44427	2.45888		0	0.569674	0.0221505	0.0208818	0.089341	0.0531397		0	4.26441	0.605837	0.328157	1.1359	0
ACER3	0		0	-1.97576	0.749465	0.695196	8.28943	8.59062		0	-3.12796	0.0846909	0.186645	3.13848	3.60287		0	-1.97578	0.240184	0.406565	8.0352	8.1625
ACHE	0		0	-0.45579	0.799697	1.63453	2.31126	2.31634		0	1.10897	0.370809	0.190208	0.882664	0.600381		0	0.667491	3.38433	6.20937	5.4897	5.1326
ACIN1	0		0	-1.48491	0.3131	0.403621	8.00231	8.05456		0	-1.78713	0.0477822	0.150638	4.87536	5.11077		0	-2.41438	0.0848994	0.159577	11.6698	11.8506
ACLY	1		3.67021	-6.20711	0.264658	0.634267	9.92287	10.7339		0.568377	-5.81057	0.111155	0.264263	4.78419	5.52668		0	-4.36501	0.170261	0.416068	11.1586	12.0503
ACMSD	0		0	-1.63643	0.000432412	0.00102606	2.50239	2.51057		0	-0.491988	0.0961355	0.0678058	0.413612	0.502516		0	0.842667	0.381673	0.160883	0	0
ACO1	0		0	-1.27838	0.545361	0.527978	7.38378	7.61506		0	-0.717123	0.142745	0.471972	4.35079	4.40122		0	0.857557	0.188576	0.407945	10.2456	9.94435
ACO2	0		0	3.69965	0.471551	0.503116	9.65021	9.22514		0	1.16812	0.173028	0.1628	5.07931	4.97075		0	1.71332	0.142874	0.37469	11.646	11.4772
ACOT1	1		10.6871	10.5644	1.52444	0.566396	9.32889	7.25826		0	2.84399	0.912345	1.07593	3.04117	1.68337		2.34528	6.61093	0.814371	0.529078	10.2101	8.8084
ACOT11	0		0	1.99275	0.370661	0.420584	5.2037	4.82265		1.93383	7.39122	0.552788	0.865562	4.00666	1.4285		0	3.02566	0.670705	1.59775	7.1961	6.5188
ACOT12	0		0	-0.645737	0.000939024	0.00129381	2.56197	2.56704		0	0.586558	0.0501423	0.042665	0.198802	0.139915		0	3.9593	0.866851	0.151602	0.8631	0
ACOT13	0		0	-0.642803	0.513147	0.91158	7.93468	8.09186		0	-1.03624	0.147938	0.191201	3.09325	3.13947		0	-2.66198	0.176669	0.330815	8.9613	9.5306
ACOT4	1		2.48694	5.73395	2.80674	1.42263	5.19342	2.36987		0	2.75405	0.437542	0.706428	2.62349	1.82778		1.18919	5.65236	1.25809	2.08994	7.2352	5.1944
ACOT6	0		0	-0.68641	0.000297477	0.000345986	2.41403	2.41678		0	-0.230926	0.155676	0.55865	0.744048	0.870028		0	-0.0224585	0.684601	2.11341	1.3207	0.79535
ACOT7	0		0	1.12031	1.92895	1.05068	8.5176	7.82799		0	-0.311261	0.705689	0.687604	3.60029	3.92934		0	-1.12635	0.740725	1.55173	9.6403	10.2835
ACOT8	0		0	0.20243	0.258279	0.235829	6.29338	6.29132		0	0.562106	0.0421637	0.217568	3.93263	3.92512		0	-0.279243	0.148324	0.33052	8.8366	8.7944
ACOT9	0		0	1.19377	0.385969	0.541506	9.57452	9.53861		0	0.770677	0.313322	0.157681	5.11537	5.04281		0	0.686702	0.368501	0.66141	10.0027	9.9624
ACOX1	1		2.06967	-5.46985	0.667656	0.377382	6.26868	6.92988		0	-2.03549	0.177333	0.0977225	3.88411	4.11749		0	0.233959	0.164521	0.254395	9.7834	9.74505
ACOX2	0		0	3.09102	3.14785	1.79533	6.45032	4.49567		0	4.32883	0.927502	0.699773	3.2757	1.64934		0	3.74675	3.95447	5.12684	8.6396	5.7225
ACOX3	0		0	0.931996	1.14502	0.623125	3.53009	3.44152		0	3.55011	0.254352	0.0766623	3.95078	3.36162		0	-0.250663	0.367418	0.460922	8.6952	8.6115
ACOXL	0		0	-1.15434	0.00286735	0.00434564	2.81201	2.82048		0	-2.31366	0.0269817	0.0586297	0.250826	0.337397		0	1.83324	0.781096	1.02253	1.824	1.1589
ACP1	0		0	-2.84241	0.265252	0.680991	9.35973	9.8083		0	-0.923059	0.126216	0.272568	5.29732	5.47903		0	-3.17916	0.231162	0.302342	10.0967	10.3762
ACP2	0		1.53506	-5.10281	1.16862	0.95398	6.24749	7.69149		0	-4.99671	0.144892	0.149811	3.72831	4.5271		3.90866	-7.95174	0.202857	0.30448	9.3513	10.3578
ACP5	0		0	-3.92748	3.2265	8.54453	3.10632	4.66976		0	-4.99736	0.664153	2.78107	2.20067	4.72253		0.699377	-5.24842	2.30481	4.48239	7.3086	9.4018
ACP6	0		1.73705	5.16632	1.83192	3.34368	6.63138	5.01778		0	4.63508	0.23264	0.233419	3.3965	2.54852		0.151471	4.79453	0.499698	0.94931	7.9996	6.6113
ACPP	0		0	-1.34809	0.000238468	0.204314	2.37554	2.3815		0	-2.33513	0.105328	0.387615	0.717101	1.01417		0	-2.12161	1.87234	1.89035	2.3069	3.26665
ACPT	0		0	-1.89726	0.062897	0.116965	3.55825	3.64363		0	0.491694	0.143996	0.304704	0.999446	0.818491		0	-0.528176	0.121284	0.330377	0	0
ACR	0		0	-0.0809516	0.010905	0.00674084	2.24127	2.24511		0	0.267077	0.0128167	0.0067885	0.106662	0.0923993		0	0.951559	0.599091	1.09326	1.4557	0.85975
ACRBP	0		0	0.157727	0.905188	1.1683	2.51911	2.51461		0	-1.01862	0.0924242	0.0937315	0.909953	0.94125		0	-2.19934	1.24281	1.03514	4.2904	4.81005
ACRV1	0		0	-0.938284	1.48355e-05	0.00232884	1.97371	1.97278		0	2.26201	0.209361	0.0920256	0.911584	0.545735		0	4.21698	0.985876	0.928052	3.0417	1.689
ACSBG1	0		0	-2.67398	0.000312067	0.000323303	2.65962	2.67058		0	2.97044	0.0925281	0.0980512	0.754017	0.271224		3.40528	7.51251	0.750717	0.793227	5.3751	3.60315
ACSBG2	0		0	-0.602733	1.681e-05	3.04755e-05	2.09437	2.09557		0	0.172876	0.0629249	0.0662539	0.596259	0.591944		0	3.17715	0.987397	0.408801	1.1775	0.7098
ACSF2	0		0	-2.19806	0.344295	0.299588	6.22826	6.60261		0	-1.25303	0.251458	0.74176	2.74658	2.81242		0	-2.50407	0.280756	0.642053	8.1938	8.8991
ACSF3	0		0	-2.78584	0.00702422	0.0494788	3.18542	3.24188		0	-0.979767	0.0754854	0.158743	2.53214	2.74311		0	-2.36969	0.322377	0.341556	8.491	8.6943
ACSL1	0		1.29025	-4.95197	1.95966	1.72068	8.59105	9.72361		0	-3.86228	0.29496	1.12881	4.10402	5.55739		0	-1.75093	0.476093	1.53758	9.8845	9.97995
ACSL3	0		0	-1.71086	0.501622	0.908192	9.70037	9.90055		0	-1.24571	0.200856	0.181201	4.6146	4.84347		0	-2.96282	0.396408	0.5345	10.3934	10.9954
ACSL4	0		0.0611941	-4.17744	0.537589	0.712446	5.59416	6.20183		0	-2.31656	0.125716	0.342659	4.63763	4.85636		0	-1.79115	0.245374	1.11166	10.2733	10.4896
ACSL5	0		0	-1.31201	1.46513	1.50677	4.58184	5.2306		0	-1.64582	0.347285	1.22284	2.52492	3.3621		0	0.59931	0.984152	1.71273	8.2189	8.0353
ACSL6	0		0	0.398696	0.593159	0.207318	2.73722	2.73899		0	1.93771	0.387755	0.163851	1.16493	0.854385		0	2.88813	3.67979	1.51702	4.0585	2.63055
ACSM1	0		0	0.434021	0.00345174	0.000190694	2.47864	2.48753		0	3.49545	0.556805	0.0237748	0.433953	0.111887		1.11651	5.59246	4.4456	1.8233	3.6432	0.6487
ACSM2A	0		0	-1.10009	0.00317063	0.0500344	2.93194	2.91999		0	-1.65617	0.00712594	0.00254009	0.156426	0.223499		0	0.273558	1.71919	1.08336	0.475	0.2359
ACSM2B	0		0	0.349996	8.46782e-05	0.000106411	2.21859	2.21883		0	0.414009	0.00142934	0.00109181	0.0133285	0		0	0.281793	0.723537	0.664088	0	0
ACSM3	0		0	0.131025	0.242494	0.592472	2.27929	2.27421		0	3.27332	0.543293	0.15052	1.48446	0.86133		0	2.40795	2.86861	4.50883	5.9586	3.92725
ACSM5	0		0	4.02184	5.92632	0.51607	2.623	2.62656		0	0.817043	1.95223	1.42935	1.93943	1.47778		0	2.91392	7.02392	5.42319	7.2608	4.23415
ACSS1	0		0	-1.98481	0.587796	1.161	4.58503	4.77254		0	0.668429	0.313058	0.734014	2.93766	2.84158		0	0.731909	0.921067	2.14069	8.8382	8.72285
ACSS2	0		0	0.477817	0.595474	0.435404	7.3783	7.25176		0	1.71648	0.136986	0.201392	3.89835	3.74418		0	3.87264	0.646183	0.419261	10.063	8.96555
ACSS3	0		0	3.77329	1.4706	2.13418	6.26737	5.26492		0	0.901704	1.00362	0.725787	3.69652	3.32416		0	2.885	3.15378	7.42711	8.3164	6.1016
ACTA1	1		2.39581	5.5562	15.0734	15.9839	10.2401	2.94035		0.546819	5.78674	9.66278	1.20193	5.95871	0.764864		0	3.73757	14.1577	22.846	10.3335	3.2601
ACTA2	1		13.6363	11.1329	0.809748	2.63239	15.4293	12.5292		2.13429	7.63755	1.92285	1.10034	10.3951	6.65723		1.76595	6.12848	0.411279	6.81999	16.7757	13.0741
ACTB	0		0	3.72281	0.084174	0.190947	15.4518	15.2478		0	3.20205	0.0717163	0.0693351	10.591	10.2105		0	2.29842	0.212027	0.455166	17.6616	17.126
ACTC1	1		4.97568	7.04827	10.051	6.35042	9.20344	3.6092		1.88051	7.32642	5.56959	0.815897	4.74679	0.42729		0	3.11623	10.2647	16.7566	11.1685	6.6204
ACTG1	0		0.577999	-4.50828	0.142391	0.155321	14.2151	14.5304		0	-4.45933	0.149591	0.105983	8.77037	9.26068		4.75897	-8.71467	0.23994	0.369417	15.0431	16.4009
ACTG2	1		16.0582	14.1623	0.485897	11.2553	14.9851	8.10043		2.65212	8.29452	0.272521	5.80668	10.075	3.59148		3.61939	7.69833	1.24842	10.5433	16.4091	9.8206
ACTL6A	0		0	0.00934731	0.414639	0.503908	9.54747	9.64965		0	-0.864062	0.268114	0.396109	4.79202	4.70946		0	-1.3046	0.313967	0.280819	9.7696	9.7384
ACTL6B	0		0	0.439479	0.0584679	0.0231504	2.69328	2.70138		0	-0.278129	0.00568161	0.00753667	0	0.0212342		0	1.20056	0.254063	0.14462	0	0
ACTL7A	0		0	-1.72206	4.6191e-05	0.0517642	2.13427	2.13661		0	0.226072	0.0199528	0.0213379	0.145144	0.123743		0	-0.814756	0.021011	0.043549	0	0
ACTL7B	0		0	-1.75109	0.000179592	0.0160741	2.30073	2.30526		0	-1.40009	0.00615005	0.0239608	0	0.0833324		0	0.925519	0.173667	0.118486	0	0
ACTL8	0		0	-0.373095	0.0646843	0.0394845	2.30148	2.30952		0	-1.66022	0.000805042	0.00343282	0	0		0	-1.10994	1.47798	1.41887	0	0
ACTL9	0		0	-0.521818	0.000150693	0.000153196	2.28125	2.28422		0	-0.426707	0.000460295	0.000592813	0	0		0	-0.559699	0.0822408	0.108103	0	0
ACTN1	1		8.17805	8.90077	0.286797	2.76777	13.6245	11.8812		0	4.30166	0.188095	1.54639	7.80603	6.53642		1.33496	5.77224	0.512905	1.44604	15.0588	13.4374
ACTN2	0		0	-0.557329	2.62943	5.08619	2.94785	2.88062		0	2.79476	0.79351	0.322801	1.22002	0.366153		0	1.05936	4.8989	19.1997	7.0716	5.8889
ACTN3	0		0	-1.44516	0.253708	2.86344	2.28966	2.28503		0	-0.464523	0.0205117	0.0224329	0.19122	0.245913		0	-1.15143	0.659137	8.20207	2.3209	2.2269
ACTN4	1		4.92245	6.85258	0.635784	0.772654	11.2258	10.1499		0	3.59715	0.478896	0.324311	7.02917	6.28712		0	4.12818	0.498062	0.470342	14.4138	13.8755
ACTR10	0		0	2.15493	0.185898	0.24643	11.0004	10.8446		0	2.66931	0.0806607	0.26573	5.02527	4.64544		0	0.480818	0.15629	0.275966	10.3012	10.2195
ACTR1A	0		0.481118	-4.43484	0.404942	0.747114	7.67401	8.40161		0	-1.94164	0.162464	0.0755955	4.99695	5.23418		0	-4.21801	0.15835	0.189372	11.2936	11.8023
ACTR1B	0		0	2.27434	0.322764	0.384893	7.86434	7.63726		0	2.71132	0.068094	0.0946812	5.12285	4.86287		0	1.48438	0.172321	0.297317	10.6999	10.3329
ACTR2	0		0.238723	-4.29845	0.340248	0.365909	11.2347	11.7151		0	-4.25983	0.155866	0.165707	5.99724	6.40545		1.0869	-5.56794	0.279509	0.286021	11.8313	12.868
ACTR3	0		0	1.76563	0.232863	0.236474	12.7046	12.5726		0	-0.990075	0.111544	0.0512915	6.02504	6.00052		0	-0.593813	0.179939	0.315241	12.3083	12.3735
ACTR3B	0		0	-3.42201	0.0846304	0.946783	5.09877	5.25012		0	-1.9767	0.12174	0.311787	1.78182	2.32835		2.02561	-6.34411	0.465737	0.342682	5.8084	6.9513
ACTR3C	0		0	-2.18399	0.00014399	0.0385451	2.30681	2.31532		0	-1.53634	0.336572	0.861059	1.14172	1.34025		0	-2.30594	1.68337	2.75234	2.4255	3.13145
ACTR5	0		0	-1.5172	0.498164	0.506645	5.60604	5.81961		0	-2.66569	0.0526566	0.124438	2.61447	2.96653		0	-0.0498319	0.229326	0.180059	7.8668	7.74385
ACTR6	0		0	1.91888	1.03856	0.401753	8.64738	8.27296		0	3.523	0.0752653	0.203215	3.73522	3.09097		0	1.90757	0.163738	0.492049	9.0108	8.7297
ACTR8	0		0	-1.01766	0.207058	0.233577	6.89073	6.84344		0	0.806061	0.0810651	0.116802	3.65927	3.60731		0	-0.35894	0.143867	0.134845	8.9198	8.9244
ACTRT2	0		0	-1.14516	0.000313434	0.0494353	2.23674	2.2383		NA	NA	0	0	0	0		0	-0.8574	0.0265672	0.0442105	0	0
ACVR1	0		0.233465	4.28571	0.567399	0.768953	10.1309	9.39157		0	2.35138	0.184074	0.147971	4.84728	4.42855		0	3.03143	0.542552	0.547677	10.8994	10.3159
ACVR1B	1		3.43627	-6.20662	0.764515	0.504849	6.37942	7.34353		0	-3.48663	0.222527	0.180863	2.26686	2.80301		0	-2.94787	0.301133	0.840043	8.0471	9.10425
ACVR1C	0		0	1.46421	1.0356	0.529796	2.88925	2.9023		0	0.476058	0.327392	0.0981255	0.909713	0.84278		0	0.741191	2.64993	3.03906	4.6605	4.2709
ACVR2A	0		0	-2.40979	0.796908	1.28604	7.30089	7.44768		0	-0.153084	0.190961	0.0835296	3.00878	3.02528		0	-2.77237	0.49734	0.63543	8.0062	8.76475
ACVR2B	0		0	1.51835	0.453016	0.619268	5.8169	5.51817		0	3.49413	0.226795	0.0395884	2.53697	2.11135		0	1.59015	0.369455	0.600859	7.7515	7.42665
ACVRL1	1		8.01932	-8.32928	1.41471	3.21543	3.81294	6.83365		0	-4.56299	0.345857	0.597491	2.08482	3.15458		0	-2.50868	0.68942	2.40726	8.8303	9.37235
ACY1	0		0	0.13198	5.90169e-05	9.62592e-05	2.08515	2.08587		0	-0.992224	0.203253	0.468906	2.77637	3.02008		0	-2.91391	0.261937	0.577589	7.9665	8.5586
ACY3	0		0	-1.6631	0.000472566	0.000735681	2.56056	2.57105		0	-1.6851	0.00346009	0.196079	0	0.129595		0	-2.62413	1.65026	2.71236	0.9421	2.1486
ACYP1	1		4.3056	6.59631	1.15421	1.03533	9.8807	8.15765		0	4.12917	0.416551	0.200737	4.7115	4.01675		0.846805	5.36973	0.842908	0.520039	8.1349	7.00195
ACYP2	0		0	1.14137	1.14465	1.30775	6.93348	6.54126		0	2.74527	0.195067	0.145989	2.71978	2.42561		0	-0.420212	0.377832	0.983794	6.7512	6.6361
ADA	1		3.85627	-6.38749	1.53328	1.22246	5.79773	7.24858		0	-4.23347	0.200348	0.490895	2.17974	3.34837		1.39109	-5.81852	0.508331	1.10576	6.8954	8.5819
ADAD1	0		0	-1.05278	0.0658021	1.16161	2.44913	2.45509		0	-1.00668	0.000803691	1.80701	0	0		0	-1.16206	0.11159	2.88892	0	0
ADAD2	0		0	-0.199004	1.22241	1.31829	4.61491	4.68404		0	-1.68854	0.00791371	0.0353073	0.0470664	0.131808		0	-0.308986	1.47547	1.7542	1.2061	1.4992
ADAL	0		0	0.686788	0.436178	0.795451	3.22481	2.83681		0	3.00516	0.131566	0.216621	3.25607	3.0057		0.158016	4.80014	0.168244	0.691145	8.3207	7.1641
ADAM10	0		0.19413	-4.26094	0.29407	0.697251	9.95731	10.5753		0.451384	-5.68172	0.0607831	0.10834	4.59257	5.24508		0	-1.34001	0.45443	1.32182	9.7726	10.0893
ADAM11	0		0	0.278681	0.277575	0.633771	2.80326	2.73647		0	4.51042	0.341319	0.166629	1.57488	0.797592		0	3.9452	1.0756	2.39965	5.9249	4.28315
ADAM12	1		4.51169	-6.63908	5.1716	6.67512	7.00573	10.8498		1.90868	-7.36061	1.36391	2.01355	2.63682	6.01865		3.25912	-7.38635	4.74327	3.72125	7.6171	11.8646
ADAM15	0		0	-1.42334	0.459578	0.376614	5.82503	6.09335		0	0.671941	0.168711	0.167402	5.23384	4.91964		0	3.26681	0.238202	0.462591	11.6368	11.0258
ADAM17	1		6.56204	-7.66118	0.276112	0.331143	7.42883	8.27863		0	-4.80012	0.0948536	0.193785	3.83423	4.50455		0	-3.34916	0.332583	1.12319	8.3842	9.1304
ADAM18	0		0	0.131822	9.27576e-05	7.9766e-05	2.28859	2.28909		0	-0.655485	0.00290765	0.0207574	0	0		0	-1.71083	0	0.336847	0	0
ADAM19	1		8.545	8.77543	0.676554	2.99404	9.03392	6.93842		0	4.7338	0.398884	0.37672	4.97625	4.03347		0	2.38864	1.03416	2.38679	11.2886	10.3128
ADAM2	0		0	-1.03175	0.000273602	0.000289568	2.42875	2.43486		0	1.03969	0.000554007	0.000278229	0	0		0	0.365193	0.204968	0.0534972	0	0
ADAM20	0		0	-1.48212	0.000400452	0.0211134	2.59381	2.606		0	2.65188	0.400183	0.154372	1.92157	1.43402		0	0.768094	0.576741	0.640863	1.344	1.07105
ADAM21	0		0	-0.426445	8.19344e-05	0.000158736	2.19226	2.19462		0	1.6553	0.398583	0.187237	1.20165	0.813539		0	1.04458	1.02227	1.95085	2.6911	2.25235
ADAM22	1		13.6744	12.1088	3.93009	1.77288	7.7679	2.53683		2.13886	7.64322	0.382917	1.43933	5.04803	1.73893		6.50554	10.3818	1.19764	3.95952	8.9983	4.1238
ADAM23	0		0	2.50205	4.58083	1.71251	3.14951	2.90406		0	-0.388806	2.21583	1.51817	0.834656	1.9299		0	-0.284429	13.6632	9.0456	5.3613	7.1659
ADAM28	0		0	-1.15024	2.64645	3.11204	3.97885	4.92746		0	-2.86369	0.480216	0.358343	1.96571	2.83221		0	-2.74294	2.10253	3.10424	5.1236	6.1798
ADAM29	0		0	-0.374969	0.0115558	0.0165071	2.93978	2.95271		0	1.47324	0.116336	0.0102066	0.0735045	0.118535		0	-0.974273	0.737551	0.882616	0	0.36245
ADAM30	0		0	-1.16599	0.00189822	0.00249688	2.73097	2.73999		0	-1.19645	0.00219752	0.0024872	0.0291824	0.066215		0	0.18524	0.0709462	0.0484097	0	0
ADAM32	0		0	-1.96011	0.0137275	0.156539	3.1212	3.15528		0	0.309615	0.553115	0.214132	1.89055	1.90381		0	0.30068	1.72483	1.29069	3.5182	3.15475
ADAM33	0		0	-0.362674	1.09033	1.22515	8.76272	8.80891		0	1.07829	0.720595	1.83922	4.75869	4.12515		0	3.541	3.69239	7.86926	9.7057	7.14435
ADAM7	0		0	-1.47652	0.00028722	0.000436853	2.50239	2.5072		0	0.258155	0.0130258	0.0037019	0	0		0	-0.997841	0.0304637	0.578882	0	0
ADAM8	0		0	-2.65454	0.60763	1.07197	5.07494	5.40905		0	-2.62117	0.459981	0.455022	1.57473	2.5031		0	-4.47679	1.40976	2.59281	6.3649	9.00535
ADAM9	0		0	-1.2983	0.594632	0.636973	11.1443	11.1738		0	-0.795133	0.230403	0.270455	5.86415	5.95487		0	-0.307929	0.429414	0.769404	11.5599	11.6295
ADAMDEC1	0		0	-0.332597	5.2907	6.44729	2.52534	2.53076		0	-2.23501	1.16468	3.94735	0.518324	2.43485		0	-1.68247	7.30174	10.295	4.1194	5.0863
ADAMTS1	1		10.5993	9.57969	0.882336	1.09529	11.6378	9.70614		0.279961	5.49393	0.480263	0.978632	6.44825	4.5819		0.339115	4.95014	0.913456	1.95297	12.8037	10.8696
ADAMTS10	0		0	2.37869	0.931936	0.598874	7.18557	6.75129		0	1.69075	0.969233	1.58988	3.84373	2.93561		0	3.8601	1.18781	3.35324	9.4729	8.25025
ADAMTS12	1		3.31813	-6.03954	1.98002	5.62443	4.90835	7.69184		0.390927	-5.61527	0.739715	1.43111	1.60528	3.7246		1.15438	-5.62365	1.79819	2.40189	5.6981	8.19945
ADAMTS13	0		0	-1.80378	0.309752	0.586007	2.91783	2.96078		0	0.205682	0.186912	0.426508	1.31571	1.23234		0	3.49753	0.805095	3.20981	7.0733	5.5815
ADAMTS14	1		6.05499	-7.59174	0.251568	1.43096	4.7876	5.76886		0.884655	-6.16311	0.166503	2.50134	0.44749	3.28389		4.99195	-8.92893	2.21453	2.57815	5.0203	8.523
ADAMTS15	0		0	2.50945	2.82567	1.64599	3.49672	2.69378		0	1.37232	0.679648	1.56603	1.73332	0.737398		0	4.16967	1.09523	6.18035	6.608	4.10595
ADAMTS16	0		0.984336	-4.94433	0.00137009	1.64403	2.46601	2.53731		0.0908419	-5.28881	0.01313	1.9896	0.144217	2.50941		3.77544	-7.8347	2.53963	5.31719	1.7466	7.3523
ADAMTS17	0		0	1.76424	3.4133	1.95159	2.09479	2.08866		0	0.795861	0.594683	1.31581	1.91011	1.28257		0	3.64565	1.20517	2.87793	6.8184	5.28555
ADAMTS18	0		0	-1.57524	0.0711269	1.00983	2.75423	2.7645		0	-1.73953	0.115496	0.318016	0.275744	0.494107		0	0.780635	1.76064	4.42567	3.481	2.6343
ADAMTS19	0		0	0.426656	2.15651	0.610777	3.18435	3.19427		0	-1.43183	0.22444	0.245089	0.094978	0.302482		0	-0.722015	3.72468	6.40797	0.421	0.4133
ADAMTS2	1		10.7494	-9.69208	3.37581	3.76986	6.40724	10.6935		1.96766	-7.43249	0.933887	1.39435	2.0359	5.44428		4.44241	-8.42717	1.73074	1.71512	7.4154	10.614
ADAMTS20	0		0	-1.74405	0.000604451	0.020354	2.53099	2.53961		0	-1.00384	0.0545859	0.106258	0.00824273	0.0333807		0	-2.44995	0.167482	3.0899	0	0.5915
ADAMTS3	0		0	0.796765	2.3556	2.00197	2.4787	2.47557		0	-0.626002	0.592749	0.349225	1.22408	1.51136		0	0.0107245	3.35241	3.74181	6.0731	5.7302
ADAMTS4	0		0	-0.761525	3.76786e-05	3.86204e-05	2.07374	2.07346		0	-2.89943	0.784947	0.91605	3.50045	4.87133		0	-2.43799	0.939047	1.97769	9.2983	10.2672
ADAMTS5	1		5.43294	-7.08798	4.96148	6.91071	6.69032	10.2919		0	-3.75353	0.798601	2.48744	1.77426	3.05408		0	-3.33596	2.16299	4.5209	7.1445	9.01955
ADAMTS6	0		0	0.425087	1.46975	2.0955	5.22284	5.028		0	2.35728	0.778376	0.812161	3.28354	2.38888		0	0.613643	0.936743	3.67499	7.5602	7.54
ADAMTS7	0		0	-3.14014	0.0355974	0.0925715	3.28182	3.36974		0	-2.23254	0.600708	0.401336	2.10543	2.56642		0	-3.96219	1.19211	1.28831	8.2166	9.43655
ADAMTS8	0		0.187475	4.36129	5.89354	2.13095	4.32051	2.7301		1.65424	7.05433	1.23363	0.0871474	1.76817	0.0757895		5.84856	9.73722	5.51556	3.08018	7.8014	2.3288
ADAMTS9	0		0	2.41046	3.27617	2.70667	6.49188	5.38424		0	-0.0244716	0.454994	0.565947	3.4269	3.7859		0	0.18522	0.738281	3.6528	9.274	8.758
ADAMTSL1	1		3.01765	-5.88181	1.59255	4.55915	3.17348	5.78416		0	-2.85454	0.786577	3.35141	1.90647	3.73669		1.50795	-5.91499	3.23701	2.25249	6.953	9.5643
ADAMTSL2	0		0	-2.15328	0.00594706	0.357772	2.41158	2.42486		0	-2.55907	0.0583018	0.654467	0.847976	1.31821		0.645851	-5.20416	2.50396	2.35999	5.4322	7.29775
ADAMTSL3	0		0	-1.61901	1.09123	2.63496	2.61317	2.62148		0	0.547907	0.953505	1.01707	0.941561	0.573738		0	-0.980994	3.67101	10.9251	6.0581	6.08645
ADAMTSL4	0		0	-3.63002	0.226987	2.32666	4.92832	5.18169		0	-1.35071	0.81625	0.994309	2.62473	2.79711		0	1.0072	1.79644	1.98092	9.0917	8.7374
ADAMTSL5	0		0	-2.16603	0.00316065	0.219821	2.61954	2.64136		0	1.23628	0.565466	0.213804	1.1556	0.964195		0	-0.0482885	4.95152	3.06742	5.3644	5.34735
ADAP1	0		1.05528	-4.7888	0.201885	0.243604	6.11667	6.48312		0	-3.07551	0.125384	0.341856	1.15973	1.73631		0	-2.29239	1.50954	2.32534	5.7361	6.59385
ADAP2	0		0	-3.69676	1.39168	2.72846	7.41081	8.67159		0	-4.80497	0.332553	0.490288	3.09614	4.04035		0.0877303	-4.74116	1.23663	1.2816	7.3944	8.66925
ADAR	0		0	-3.02146	0.181545	0.396116	11.0457	11.4717		0	-3.2274	0.0393366	0.195531	5.77812	6.11989		0	0.123904	0.0809777	0.171521	12.6029	12.6195
ADARB1	0		0	-2.89602	1.4375	2.02248	5.86406	7.2228		0	-3.62016	0.330575	0.478315	2.27041	3.22313		0	-2.30118	1.08673	1.50969	8.4836	9.4819
ADARB2	0		0	-1.98158	0.000219263	0.00109313	2.50204	2.50716		0	-1.37712	0.00215621	0.0164241	0.125103	0.168462		0	-2.07691	0.375106	1.79428	0	0.49765
ADAT1	0		0	-2.61993	1.02927	1.29578	5.02525	5.91602		0	-1.2058	0.200032	0.151011	3.0212	3.23982		0	-0.112918	0.460036	0.728921	7.2304	7.4069
ADAT2	0		0.00627264	-4.14278	0.322522	0.803298	3.64323	4.36152		0	-3.03752	0.0973768	0.201015	1.79016	2.15527		0	-2.85565	0.544557	0.482094	6.6273	7.2841
ADAT3	0		0	-2.00316	0.5047	0.956187	3.71001	4.17317		0	-1.80155	0.107928	0.173517	1.16941	1.515		0	-1.44621	0.775127	0.93043	5.5377	5.75615
ADCK1	0		0	-0.313934	0.445888	0.341125	5.98161	6.07896		0	-0.104541	0.083474	0.175926	2.23751	2.15938		0	-0.740206	0.314007	0.452198	7.3996	7.55625
ADCK2	0		0	3.21914	0.878166	0.50631	7.86389	7.26255		0	2.18977	0.155668	0.194269	4.27804	3.7823		0	2.6062	0.23241	0.242792	9.9075	9.46435
ADCK5	0		0	-0.383408	0.324384	0.407188	2.6028	2.60382		0	-1.85884	0.157339	0.111909	2.52293	2.73356		0	-1.63502	0.375842	0.465019	7.2855	7.6857
ADCY1	0		0	0.183647	4.85371	3.74527	6.48506	6.20082		0	-0.193671	1.50608	2.13713	2.90609	3.35696		0	0.551398	9.01891	4.87853	9.6055	8.53285
ADCY10	0		0	-1.0209	0.000321472	0.000405161	2.62231	2.62817		0	-1.30862	0.0277607	0.0513505	0.375675	0.462906		0	1.56802	0.587747	0.573645	1.6684	1.58235
ADCY2	0		0.338483	4.40645	8.68589	5.29607	6.43567	2.36179		0	2.0817	1.94557	1.33494	1.94316	0.565455		0.858819	5.3797	3.06188	8.48787	8.9024	4.9038
ADCY3	0		0	-1.56129	0.462716	1.01634	6.91449	7.08319		0	0.361046	0.171402	0.131876	3.71375	3.66225		0	1.88452	0.216108	0.861413	10.5324	10.0113
ADCY4	0		0	-3.10578	0.988451	1.25688	4.32502	4.74973		0	-3.30383	0.240594	0.301865	1.62293	2.28181		0	0.217326	1.06269	1.91863	7.3158	7.25125
ADCY5	1		6.3236	8.11305	3.89854	1.22595	5.02886	2.1062		5.7276	12.9699	0.418285	0.600527	4.4412	0.672529		5.33995	9.25305	0.995438	8.68171	10.8323	3.00335
ADCY6	0		0	-0.479329	0.42971	0.341498	5.58862	5.70071		0	1.16536	0.244061	0.22454	3.86601	3.75168		0	2.94685	0.326842	0.745635	10.5582	9.90325
ADCY7	1		5.27816	-7.17261	2.48507	1.73689	5.10311	7.32981		0	-4.68888	0.239288	0.342048	3.25762	4.20405		0	-4.63811	0.769433	0.933456	8.4357	9.80975
ADCY8	0		0	-2.40286	0.00030063	0.136671	2.54056	2.54712		0	-0.338939	0.703972	0.360131	0.0334501	0.190099		0	-1.55533	5.25682	5.38326	0.9655	2.76605
ADCY9	1		4.70934	6.71949	0.576461	0.983987	8.27456	7.14		2.27923	7.81859	0.192676	0.156928	4.12847	2.94629		4.04919	8.07603	0.223031	0.644025	11.0482	9.43965
ADCYAP1	0		0	0.742669	0.655976	0.491132	2.28707	2.28983		0	0.839355	1.19029	0.722958	0.541102	0.454519		0	4.30481	6.6284	2.18096	4.3292	2.0274
ADCYAP1R1	0		0	-1.63691	0.000270378	0.949732	2.60389	2.6127		0	-4.3317	0.090583	0.343823	0.307072	0.949661		0	-1.28326	1.4983	4.69687	1.56	1.8266
ADD1	0		0	-1.0631	0.136253	0.263949	10.192	10.3024		0	0.830881	0.145698	0.104952	5.85591	5.77678		0	3.00163	0.213799	0.254192	12.8825	12.4605
ADD2	0		0	-0.692889	0.13911	0.0579976	3.61555	3.66045		0	-0.582368	0.104897	0.152147	0.374104	0.326452		0	-1.43329	1.82669	5.59606	3.2022	4.3484
ADD3	1		13.2357	-11.3493	1.56691	1.04035	8.91964	11.4174		1.99633	-7.4675	0.363352	0.462168	3.21307	4.77107		3.09902	-7.24893	0.438588	1.07962	8.5579	10.4416
ADH1A	0		0	0.417575	0.0104168	0.00127115	2.41449	2.41759		1.29455	6.63179	0.503572	0.088426	1.77929	0.621116		0	2.81116	2.46773	1.86115	1.3618	0
ADH1B	0		0	-0.398364	6.5015	8.64861	2.96299	2.95339		0	1.20451	5.37424	7.1355	2.86278	0.14509		0	4.63003	9.8031	10.2523	7.0794	2.01965
ADH1C	0		0	-2.65408	0.0821393	4.17828	2.7232	2.74872		0	-1.35218	0.782929	3.25562	0.219302	0.29812		0	-0.642124	1.8043	5.83014	1.8735	1.8435
ADH4	0		0	0.41297	0.128343	0.192083	7.64174	7.56979		1.1248	6.43612	0.291608	0.0553145	1.72671	0.919173		0	0.923949	1.80716	1.37775	0.4777	0
ADH5	0		0	4.18158	0.335153	0.205894	11.1266	10.6475		0	4.36572	0.203203	0.337732	6.46621	5.57759		5.07161	9.00267	0.366088	0.0801911	12.2551	11.1983
ADH6	0		0	-0.535398	6.22214e-05	0.000106835	2.40837	2.41446		0.944397	6.23078	0.519351	0.167764	2.06356	0.802763		1.88379	6.22619	1.56111	0.773889	2.2328	0
ADH7	0		0	0.510821	0.0150165	0.00050786	2.57113	2.58064		0	0.704612	0.00412085	0.00303004	0.035959	0		0	-0.550101	0.0667813	0.198427	0	0
ADHFE1	1		12.6673	10.9656	2.04905	1.46853	6.58764	2.81429		2.12944	7.63151	0.419894	0.78989	4.01799	1.47346		3.77258	7.83219	0.651815	2.22151	8.1893	5.1857
ADI1	0		0	-1.03348	0.459646	0.669684	10.1011	10.2719		0	0.414695	0.223408	0.382273	5.13869	5.01511		0	-0.348798	0.406799	0.326091	10.6193	10.5777
ADIG	0		0	-0.852163	0.0727338	0.111378	2.74424	2.76078		0	-0.842404	0.002098	0.00272756	0	0		0	-0.302687	0.0732764	0.0435003	0	0
ADIPOQ	0		0	-2.37826	0.000173904	3.50405	2.40513	2.40928		0	-1.66467	0.0203269	3.11201	0.676447	0.857191		0	-0.570723	1.50173	2.87609	0	0
ADIPOR1	0		0	1.73763	0.385625	0.339882	8.64336	8.29595		0	1.91293	0.123291	0.100637	5.70981	5.33755		0	1.08744	0.130781	0.114493	11.1857	11.0419
ADIPOR2	0		0	-1.41524	0.400948	0.422338	7.8485	7.7476		0	-0.081417	0.0831394	0.23131	4.27213	4.36494		0	-1.85366	0.170095	0.164648	10.4409	10.67
ADK	1		6.29471	-7.88861	1.42473	0.668171	7.0346	8.39991		0	-3.10632	0.519346	0.360629	3.31999	3.92339		0	-3.8729	0.453281	0.886	6.9675	8.1796
ADM	0		0	-2.60547	2.36852	3.16536	9.62833	10.6832		0	-1.90205	2.15308	1.61546	3.52612	4.73616		0	-1.0726	1.83343	4.19382	8.7996	9.46995
ADM2	0		0	-1.61501	0.0365935	0.0312161	3.55697	3.61216		0	-0.566212	0.192714	0.152076	0.926908	1.04393		0	0.194058	2.93411	6.05325	6.6778	6.53875
ADNP	0		0	0.354473	0.180232	0.228923	10.2454	10.2003		0	-2.78225	0.0838455	0.0913594	4.72679	5.0912		0	0.778295	0.155177	1.1443	10.9626	10.971
ADNP2	0		0	1.66577	0.380398	0.589482	8.95454	8.66834		0	0.90342	0.0666299	0.253179	3.84321	3.64924		0	2.05561	0.177143	0.447046	9.406	8.837
ADO	0		0	-3.79074	0.668753	0.490732	7.71305	8.41455		0	-2.99102	0.133868	0.175445	3.2365	3.58159		1.54737	-5.94762	0.176887	0.263223	8.6832	9.48895
ADORA1	0		0	-0.911916	0.230768	0.459234	4.95345	4.93189		0	2.47208	0.220355	0.249351	0.823119	0.210804		0	1.80624	1.05864	4.45663	6.3532	5.01575
ADORA2A	0		0	-0.479097	0.120074	0.145412	2.3374	2.33647		0	-1.52825	0.109546	0.414091	1.52306	1.71359		0	0.376166	0.493015	1.11708	7.0228	6.7041
ADORA2B	0		0	-1.94397	6.52234	4.8971	3.73722	6.30771		0	-4.07695	1.1787	0.323976	2.26756	3.59814		0	-4.29965	3.81611	2.46299	5.2971	7.803
ADORA3	0		0	-0.326308	2.83842	3.75536	3.07109	2.91793		0	-0.117673	0.364571	0.543066	1.88036	2.09398		0	-2.22655	1.43558	1.85651	6.8998	7.5239
ADPGK	1		5.76482	-7.26529	0.405364	0.504984	7.78492	8.92783		2.25491	-7.78809	0.0871915	0.099525	3.99105	4.90528		4.55514	-8.52908	0.161592	0.334483	8.9205	10.5029
ADPRH	0		0	3.22217	0.523915	0.25668	4.63008	4.28179		0	2.16028	0.350262	0.507118	3.25492	2.70153		0	3.99537	0.271125	1.22343	9.4504	8.42775
ADPRHL1	0		0	-2.27805	0.00554859	0.310475	3.08326	3.11357		0	-1.7052	0.158683	0.511062	0.936754	1.47409		0	-3.23713	1.09523	4.10029	4.3684	5.66075
ADPRHL2	0		0	0.841564	0.395918	0.722894	8.38326	8.22244		0	1.16077	0.162409	0.261601	4.46507	4.27376		0	0.325822	0.138608	0.465867	10.0101	9.863
ADRA1A	0		0	3.65026	1.8216	0.063836	2.71447	2.70995		1.29471	6.63199	2.18058	0.439871	4.70514	1.78719		8.42413	12.406	7.38247	0.956875	7.3488	0.49195
ADRA1B	0		0	0.0391536	1.34184e-05	1.82292e-05	1.88692	1.88795		0	-0.360383	0.727815	0.582347	0.973331	1.14759		0	0.228695	3.01842	1.62697	5.0739	4.9877
ADRA1D	0		0	-1.76346	0.00205006	0.000583743	2.88011	2.89478		0	-1.45985	0.253053	0.086929	0.146322	0.373202		0	-1.20814	4.28616	2.80729	2.8267	4.117
ADRA2A	0		0	-0.672362	3.1954	3.51603	2.25067	2.25745		0	-3.13371	0.270279	2.37375	0.34068	2.45523		0	-0.768318	5.02661	5.97354	4.8358	5.7219
ADRA2B	0		0	-0.323715	0.044567	0.0892919	2.38774	2.3941		0	1.2913	0.651112	0.19912	0.45606	0.288683		0	3.95979	3.50155	2.12507	5.527	3.93015
ADRA2C	0		0	1.03382	0.736848	0.864819	4.52684	4.3642		0	2.72812	3.01348	1.59755	2.2767	0.614895		0	2.79781	7.41808	7.38823	6.4151	5.40225
ADRB1	0		0	3.23888	4.7211	0.740894	2.68222	2.66744		0	2.51615	0.55889	0.066198	0.547031	0.409453		0	3.05158	5.14937	1.14182	2.4151	1.90975
ADRB2	1		8.94908	8.99686	3.52767	2.75674	7.09784	2.63194		3.48067	9.41312	0.459278	0.435779	4.18269	1.70775		4.48923	8.46947	1.03995	1.40304	8.0566	5.41955
ADRB3	0		0	-0.491662	0.138544	0.479912	2.67925	2.68978		0	2.9167	1.28999	0.00632683	0.293353	0.231762		0	3.62473	6.38928	2.9203	3.1911	0.66525
ADRM1	0		0	-1.42826	0.237999	0.519496	8.17413	8.25747		0	-0.560005	0.110146	0.222603	5.206	5.23662		0	-1.72626	0.0947845	0.376941	11.093	11.3232
ADSL	0		0	0.797444	0.289105	0.497305	9.57469	9.51617		0	-0.284163	0.125045	0.12126	4.96396	4.92805		0	-2.44928	0.136997	0.310566	10.118	10.4619
ADSS	0		0	1.9548	0.34706	0.789709	8.01841	7.65702		0	2.42458	0.0616896	0.0820086	4.59817	4.37392		0	-0.817883	0.174499	0.275799	9.8066	10.0126
ADSSL1	0		0	1.61976	4.46071	3.68023	4.63475	3.82472		0	1.38561	0.940234	0.680374	1.56425	1.08587		0	-1.98499	3.56038	2.71242	6.6126	7.73685
AEBP1	0		0.188516	-4.27961	5.34755	4.66653	8.87699	11.2893		0	-2.7484	5.16977	3.79941	5.34033	6.33414		0	-3.03005	7.60481	4.07511	13.2591	13.7806
AEBP2	1		2.29141	5.48299	0.349818	0.444588	9.32108	8.48231		0	4.73376	0.141341	0.0686233	4.23787	3.6102		0	2.23539	0.196387	0.758	9.6961	9.05675
AEN	0		0	-2.57779	0.542849	0.426665	5.73906	6.06467		0	-1.37845	0.729772	0.269041	3.06052	3.36083		0	-3.61597	0.766227	0.689686	8.3674	9.2813
AES	1		3.0164	5.87262	0.477384	0.599913	9.79544	8.86683		2.38615	7.9535	0.1915	0.190571	7.2871	6.05547		0.921688	5.43178	0.252484	0.566244	13.5124	12.3765
AFAP1	0		0	-0.783454	0.110814	0.233491	3.67518	3.63505		0	-0.935608	0.386083	0.148939	4.66319	4.66574		0	3.15465	0.344637	0.70135	11.5276	10.8374
AFAP1L1	0		0	-0.20761	3.82796	3.55996	3.8056	5.06033		0	-2.07234	0.519792	0.549929	2.85126	3.13562		0	4.08959	0.989604	0.479091	9.3661	8.4576
AFAP1L2	0		0	-1.7219	0.772316	1.39549	2.2783	2.29263		0	-2.90097	0.38234	0.846572	1.26153	2.23862		0	-1.97786	0.831684	3.34522	7.3833	8.19105
AFF1	0		1.35244	4.95531	0.318858	0.76014	11.1849	10.5701		0	2.12826	0.172416	0.289091	5.07029	4.67744		1.001	5.49715	0.282332	0.705065	11.4404	9.98045
AFF2	0		0	-2.31383	0.000224668	0.0118149	2.35714	2.36648		0	-2.25959	0.26513	1.38262	0.108243	0.76051		0	-2.9732	3.27615	6.83203	3.19	5.6709
AFF3	0		0	3.79028	4.30711	4.03127	6.01066	2.65135		0	2.36352	0.45818	0.622465	2.33898	1.55969		0	3.08358	1.14159	6.09462	8.0044	6.17205
AFF4	0		0.524186	4.46887	0.152626	0.189604	10.4645	10.1658		0	-0.338401	0.0713473	0.133245	5.43555	5.48368		0	2.63217	0.264124	0.748452	11.5743	11.0549
AFG3L2	0		0	-0.267658	0.302596	0.423489	10.8581	10.8023		0	-1.08421	0.15466	0.181478	4.91601	4.8321		0	-1.97941	0.206452	0.307578	10.1007	10.4067
AFM	0		0	1.57351	1.30887	0.000105702	2.22375	2.22356		0	1.67159	0.468957	0.00158041	0	0		0	0.445928	1.52426	0.786574	0	0
AFMID	0		0	-1.43391	1.99053e-05	0.0363096	2.10037	2.10046		0	-1.67217	0.0745167	0.145585	2.84	3.01425		0	-4.36761	0.388143	0.502203	7.6565	8.2231
AFP	0		0	1.6169	1.92835	0.601219	2.24348	2.23331		0	-0.0612264	0.37623	0.148611	0.212276	0.339874		0	0.567065	6.32133	5.34896	3.2436	3.74015
AFTPH	0		0	1.63202	0.374853	0.247988	8.65794	8.53275		0	2.49966	0.0887143	0.0413467	4.26563	3.96555		0	2.26203	0.233278	0.280606	9.5121	9.15425
AGA	0		0	-0.472661	0.708678	1.20739	7.58384	7.72969		0	-0.60559	0.185023	0.493719	3.31894	3.60469		0	2.43399	0.220401	0.318603	8.3696	8.02655
AGAP1	0		0	-0.574873	0.999164	1.56176	6.56832	6.43643		0	-1.47259	0.1659	0.115452	3.4662	3.70315		0	1.16023	0.601095	0.417125	8.5573	8.2915
AGAP11	0		0	-1.77075	0.704423	0.25992	7.66479	7.89429		0	2.37013	0.735569	0.751061	2.63463	1.52984		4.21734	8.22549	1.49738	2.39788	6.7013	3.576
AGAP2	0		0	-0.594393	0.619734	0.849768	4.40701	4.44043		0	-2.92671	0.0962565	0.125327	1.51133	1.80102		0	-2.314	0.751904	1.58292	6.5861	7.4576
AGAP3	0		0.170147	-4.24443	0.347411	0.49913	7.21062	7.64807		0	-3.5217	0.1515	0.14011	4.10235	4.69839		0	-3.6442	0.251021	0.456675	10.5976	11.1242
AGAP4	0		0	-4.01225	0.308479	0.658698	4.10127	4.35824		0	-2.40476	0.0861972	0.116699	2.11513	2.3983		0	0.0703416	0.408056	0.557633	7.2228	7.2097
AGBL1	0		0	-1.89578	0.00645526	0.74977	2.19689	2.19842		0	-0.837129	0.126694	0.396253	0.107489	0.226941		0	-0.965542	0.575275	3.67099	0.4777	0.2359
AGBL2	0		0	1.04388	0.000646712	0.000243564	2.33335	2.33497		0	2.84855	0.149122	0.0905349	0.632062	0.303791		0	2.74265	0.970227	2.18774	3.5361	2.57925
AGBL3	0		0	2.11699	0.489181	0.20905	3.29442	3.22208		0	2.14661	0.13279	0.105992	1.39214	1.1477		0	4.24127	0.376371	0.611009	3.6353	2.60655
AGBL4	0		0	-2.46939	0.000962063	0.0115931	2.69522	2.70742		0	2.00448	0.298986	0.0935959	0.669339	0.494482		0	4.08502	1.70093	1.06852	2.4373	1.4482
AGBL5	0		0	3.84254	1.08801	0.48648	5.99571	5.10842		0	3.45727	0.132688	0.238015	4.12655	3.47245		0	3.87066	0.334865	0.228893	9.6283	9.10655
AGER	0		0	-0.551552	0.0812928	0.10886	3.00903	3.0253		0	-0.0905904	0.159646	0.190244	1.83062	1.98911		0	0.00417303	0.586907	0.625382	5.9007	5.6875
AGFG1	0		0	-1.91779	0.604968	0.507994	8.02925	8.22701		0	-0.707666	0.116569	0.308939	4.13027	3.99804		0	-1.81579	0.231093	0.137474	10.0088	10.2404
AGFG2	0		0	-0.320823	0.205451	0.616559	2.9763	2.9969		0	1.43457	0.194327	0.256136	2.37819	2.13406		0	1.47358	0.54298	0.645963	8.9367	8.4878
AGGF1	0		0	0.224526	0.399683	0.288755	8.5063	8.30309		0	-1.2306	0.17385	0.0469598	3.91909	4.06661		0	0.144676	0.167888	0.441338	9.6287	9.60855
AGK	0		0	1.39983	0.370261	0.240709	7.61753	7.31161		0	0.104554	0.0701901	0.223658	4.02719	3.89556		0	0.510077	0.100882	0.559443	9.1252	9.18115
AGL	0		1.5972	5.09871	0.933692	1.16676	9.78089	8.77737		0	4.38347	0.508614	0.200303	4.22261	3.64126		0	3.86899	0.726933	1.57071	10.1139	8.4932
AGMAT	0		0	-3.11185	0.0843986	1.09141	2.30066	2.33823		0	-4.87472	0.032363	0.0241511	1.79041	2.03243		3.4974	-7.59227	0.941745	2.40225	2.3196	5.6657
AGPAT1	0		0	-0.966522	0.778819	0.629178	7.24106	7.53507		0	0.816014	0.138168	0.124221	4.5947	4.52335		0	0.0912231	0.168087	0.155167	11.2308	11.179
AGPAT2	0		0	-1.78484	0.353196	0.920784	5.80595	6.04684		0	-0.982948	0.317054	1.26604	3.29178	3.91168		0	-0.697925	0.827349	1.80424	8.8782	9.0286
AGPAT3	0		0.498114	-4.44564	0.447816	0.734312	7.09204	7.78378		0.386458	-5.61037	0.0739834	0.0611779	3.3431	3.85907		0	-3.91713	0.215629	0.291132	10.2562	10.6524
AGPAT4	0		0	-1.61353	1.63767	2.52595	5.10613	5.87163		0	-1.68003	0.2556	0.869708	2.81012	3.23364		0	-0.397182	0.296227	2.05472	8.8362	9.1456
AGPAT5	0		0	0.178038	1.80292	0.765298	9.19438	8.69776		0	0.106298	0.139932	0.0767304	3.77047	3.64119		0	1.68017	0.329163	0.733635	9.7995	9.5702
AGPS	0		0	-0.209651	0.894059	1.04609	7.74746	8.01787		0	-1.00997	0.094425	0.0778745	4.06467	4.14874		0	-1.23623	0.140709	0.267452	9.8853	9.9413
AGR2	0		0	-1.01095	0.000412303	0.0195875	2.57721	2.57994		0	-2.82494	0.00695032	0.0593989	0.0546843	0.206601		0	-1.05978	0.897788	2.70833	0	0.2103
AGR3	0		0	-1.26677	0.000471015	0.000675575	2.54109	2.55102		0	0.328472	0.000633633	0.000238357	0	0		0	-0.68814	0.113761	0.457095	0	0
AGRN	0		0	-2.74561	0.903854	1.25013	6.03569	6.30341		0	-4.61264	0.297667	0.443441	2.60613	3.53969		0	-3.84704	0.638495	1.66411	10.5116	11.9413
AGRP	0		0	-0.900024	4.87108e-05	8.057e-05	1.9407	1.94072		0	-0.96116	0.134694	0.157856	0.760929	0.724031		0	-1.26951	0.158159	0.823558	0	0
AGT	0		0.969314	4.77863	5.14524	3.82861	7.63964	4.80607		0	0.824312	1.91228	2.67396	2.73784	2.0733		0	1.25536	4.79384	6.07858	8.2554	7.21965
AGTPBP1	0		0	-0.748672	1.12009	1.3701	7.51154	7.49071		0	-1.36375	0.286129	0.441495	3.60647	3.70321		0	-0.227281	0.582419	1.08345	8.3246	8.27735
AGTR1	0		1.70413	-5.15493	2.33412	5.62656	3.11569	6.18427		0	-4.0957	0.779437	2.15345	0.612824	3.25267		0	-1.94153	4.02793	3.99408	5.1956	6.4069
AGTR2	0		0	0.356537	0.870744	0.767736	2.86262	2.85939		0	2.12824	0.0768862	0.000803616	0	0		0	2.01807	2.81583	0.504058	0	0
AGTRAP	1		3.32419	-6.02206	0.512235	0.765191	6.39555	7.28324		0	-2.94669	0.442676	0.37352	3.82302	4.49047		0	-4.65748	0.287618	0.950226	8.8059	9.76505
AGXT	0		0	-0.934901	0.000298202	0.00212061	2.33616	2.34108		0	-1.46757	0.000386949	0.00324675	0	0		0	-1.88572	1.4146	5.66521	0	0.59235
AGXT2	0		0	0.781552	0.000687107	0.000118293	2.28473	2.28772		0	1.6579	0.026329	0.000583025	0.0113526	0		0	-0.68488	0.467839	0.377144	0	0
AHCTF1	0		0	3.35452	0.392475	0.517245	8.44001	7.94668		0	3.44274	0.113736	0.0628804	4.5761	4.26487		0	3.8285	0.261059	0.381799	10.3936	9.9164
AHCY	0		0	-3.40687	0.394367	0.696503	8.55845	9.06756		0	-3.12928	0.189496	0.263331	4.83594	5.5333		0	-3.17262	0.296683	0.178189	10.8	11.2339
AHCYL1	0		0	-2.97509	0.279041	0.393622	10.9799	11.4452		0	-1.35608	0.156646	0.154379	5.18531	5.29619		0	-0.037666	0.199382	0.122008	11.2658	11.2849
AHCYL2	0		0.483212	-4.46275	0.178916	0.688202	3.44369	3.84406		0	-4.59206	0.159807	0.124053	2.65395	3.23847		0	-2.55712	0.461769	1.81724	7.9807	8.8482
AHDC1	0		0	0.829091	0.896811	0.787053	6.15716	6.13098		0	0.961495	0.305158	0.382482	3.44372	3.15077		0	4.07361	0.414274	0.479532	11.1577	10.4261
AHI1	0		0	-1.5493	0.56129	0.745793	8.44786	8.66655		0	-0.795535	0.197624	0.398904	4.06315	4.28986		0	-1.32913	0.314974	0.382851	8.6652	8.86615
AHNAK	0		0	-3.4795	0.689384	0.95131	10.6547	11.5675		0	-0.361924	0.314226	0.383915	7.22844	7.13446		0	1.33301	0.676401	0.461604	14.9282	14.4855
AHNAK2	0		0	3.11075	3.43844	5.08181	10.1071	8.81177		0	1.09061	1.86405	0.93815	5.26034	4.49153		0	3.68604	2.94457	4.438	12.7672	10.4561
AHR	0		0	-2.9347	0.754574	1.73662	9.2167	10.0611		0.193635	-5.40008	0.399769	0.2913	4.51812	5.70067		0	-0.732438	0.715303	1.17958	9.9719	10.1538
AHRR	0		0	-2.95008	0.0822918	3.04459	2.27311	2.28363		0	-3.45799	0.0940721	1.3541	0.266974	1.12545		0	-3.37462	1.15993	4.33188	3.7359	5.3906
AHSA1	0		0	1.83358	0.255696	0.456691	9.49388	9.20531		0	2.34152	0.101219	0.155733	5.5626	5.28301		0	-0.833135	0.159231	0.51113	11.1534	11.1068
AHSA2	0		0	-2.47426	1.0554	0.419695	8.26248	8.50003		0	0.0325336	0.279095	0.29595	4.92983	4.92143		0	1.03571	0.752864	1.38876	8.4605	8.4119
AHSG	0		0	-2.4291	0.00205628	0.00432465	2.80744	2.82688		0	2.05654	0.0177967	0.000658448	0	0		0	0.988456	2.35571	1.78117	0.5612	0
AHSP	0		0	-1.10203	0.000161973	0.000326876	2.37729	2.38568		0	-0.626758	0.0128133	0.016638	0	0		0	-1.12857	0.309473	1.17718	0.4462	0.25605
AICDA	0		0	0.263945	0.897744	0.467276	2.23737	2.23355		0	0.591854	0.0895515	0.0220682	0.975857	1.05072		0	1.53405	3.37133	1.05316	0.6324	0.57705
AIDA	0		0.125443	4.2208	0.249609	0.306288	11.9253	11.4461		0	2.69578	0.0630695	0.087417	5.76992	5.55987		0	1.75074	0.220187	0.227509	10.7236	10.479
AIF1	0		0	-2.69974	1.59772	2.0037	9.21453	10.0317		0	-2.45033	0.569831	0.607328	4.51378	5.25193		0	-3.12665	1.72825	2.28984	8.639	9.4691
AIF1L	0		0	-0.16877	7.0882	8.86562	4.19335	3.92582		0	0.107728	1.94214	3.31943	1.82142	1.21905		0	3.19806	3.08467	5.93146	8.6154	6.5943
AIFM1	0		0	0.0712189	0.782655	0.571278	6.72488	6.79154		0	-0.968846	0.0558196	0.271543	3.78994	3.94667		0	-0.834453	0.197544	0.468035	9.4998	9.33685
AIFM2	0		0	-1.29878	1.48347	1.32401	4.4705	4.89641		0	-0.381042	0.300654	0.355813	2.27908	2.39241		0	-0.262474	0.816027	1.27722	8.3988	8.2118
AIFM3	0		0	-1.06028	0.000182144	0.0755782	2.07994	2.08279		0	-1.82895	0.121465	0.11425	0.576664	0.841481		0	-3.503	1.35517	0.385519	3.2332	4.1789
AIG1	1		4.71926	6.74793	0.809393	2.12763	9.471	8.05823		1.10307	6.41118	0.271813	0.37658	5.35139	4.08293		0.44807	5.04056	0.264086	0.729797	9.9782	8.8236
AIM1	0		0	-2.76593	3.97933	5.63651	6.63416	7.82812		0	-3.97912	0.527646	0.683177	2.7025	3.90035		0	-1.36449	1.62431	3.22073	8.7665	9.86575
AIM1L	0		0	-0.882205	0.17295	0.125009	3.39753	3.43003		0	2.72305	0.18234	0.0067543	0.0963247	0.0564347		0	4.28882	4.68219	1.20127	3.5448	1.6727
AIM2	1		5.03014	-6.95164	1.89239	6.72017	2.97751	6.50459		0	-4.29236	0.417976	2.66583	0.814764	2.82877		1.25282	-5.70477	3.33799	7.26277	3.3485	7.69835
AIMP1	0		0	-0.43995	0.382396	0.284347	9.87494	9.84311		0	1.694	0.0621526	0.141717	4.49408	4.10353		0	-0.194311	0.125127	0.183167	10.0407	10.0853
AIMP2	0		0	-2.87569	0.667712	0.568775	8.79638	9.29042		0	-3.68628	0.232943	0.270173	2.99412	3.70093		0	-4.38827	0.280687	0.307626	8.4468	9.1433
AIP	0		0	0.675786	0.401069	0.302332	8.08497	7.96996		0	1.65631	0.0937676	0.180889	4.77168	4.58315		0	-0.931825	0.278813	0.524734	10.5713	10.5382
AIPL1	0		0	-1.75302	4.18545e-05	0.000151335	2.17661	2.17875		0	-0.682948	0.02345	0.0273401	1.10085	1.15358		0.194425	4.83045	1.31324	0.14093	0.5972	0
AIRE	0		0	1.37187	0.000941876	0.000147775	2.29121	2.29109		0	-1.4263	0.0135669	0.305893	0.23042	0.28577		0	-2.54705	0.144758	2.00966	0	0.7215
AJAP1	0		0	-0.260905	0.30893	0.149719	2.15189	2.15336		0	-2.38779	0.0530418	0.0982349	0.234368	0.443574		0	-2.58447	1.07224	4.50349	1.5725	2.9083
AK1	0		0	-1.95974	0.694514	1.39061	8.57762	9.26919		0	-1.79855	0.128121	0.446913	3.7599	4.17286		0	-3.71709	0.466951	1.20485	9.6984	10.4863
AK2	0		0	0.470091	0.263892	0.791841	9.39884	9.49805		0	-1.10076	0.088624	0.222897	5.3626	5.40084		0	-2.58525	0.125792	0.648269	10.5944	10.9728
AK3	0		0.979972	4.73377	0.387681	0.676633	11.7036	11.0005		0	4.56654	0.249813	0.11454	4.95131	4.29894		0	2.77349	0.245097	0.698513	11.0747	10.3322
AK5	0		0.421976	-4.49291	0.155229	1.74144	2.41587	2.75224		0	-2.9227	0.285536	2.52349	0.745839	2.33123		0	-3.74904	3.36636	8.7871	3.856	7.4458
AK7	0		0	-0.91708	0.000126382	0.00670055	2.31438	2.31247		0	1.53502	0.101596	0.015951	0.175962	0.120296		0	2.18994	1.47225	0.92024	3.1906	2.2068
AKAP1	1		24.0545	16.1553	0.675329	0.970203	11.2538	8.04348		7.13248	15.6847	0.194034	0.229414	5.75283	3.15944		8.03002	11.9714	0.279926	1.06175	12.3372	9.0895
AKAP10	0		0	1.49869	1.07202	0.579677	9.47179	8.93719		0	1.37177	0.758194	0.555416	4.65901	4.42787		0	2.75487	0.689981	2.4406	9.3742	8.62275
AKAP11	0		0	1.43554	0.360843	0.709961	9.35246	9.21492		0	0.024991	0.239555	0.157047	4.24148	4.39389		0	2.8831	0.390701	0.344713	10.3711	9.8404
AKAP12	0		0	3.64152	0.534311	3.85677	10.7901	9.79642		0	2.65362	0.27954	2.13645	5.43638	4.42284		0.351655	4.96059	0.571151	3.09799	11.871	9.53085
AKAP13	0		0	-3.50978	0.382711	0.575795	10.2818	10.8519		0	-2.4786	0.318145	0.166877	5.26185	5.91853		0	0.742125	0.36442	0.596527	11.7689	11.7718
AKAP14	0		0	-1.20173	0.0118665	0.016758	2.94582	2.9606		0	-0.99932	0.0111458	0.0816645	0.0953415	0.0524059		0	-1.13859	0.273291	1.0379	0	0.2359
AKAP2	0		0.222776	4.32738	0.26697	1.64747	11.4313	10.9725		0	2.07011	0.225239	0.907018	5.01155	4.6428		0	2.95174	0.67165	3.44969	10.8735	10.0382
AKAP3	0		0	0.76557	0.00176581	0.000459269	1.98513	1.98282		0	3.91106	0.229568	0.0564753	0.717655	0.319933		1.4829	5.89424	1.43766	1.61622	5.419	3.346
AKAP4	0		0	-0.979643	0.0036818	0.00260498	2.80094	2.80875		0	2.33304	0.07047	0.0003013	0.0170464	0		0	3.65575	2.02076	0.175694	0.4647	0
AKAP5	1		4.72155	6.75177	1.41319	1.72162	6.383	4.25674		0.0714076	5.26794	0.391552	0.435618	3.43975	2.15228		0	4.31311	1.52576	4.36338	9.0341	6.95865
AKAP6	0		0	4.03168	1.84227	0.426163	2.45532	2.42289		2.51643	8.11956	0.308794	1.40589	4.43774	1.11315		3.0965	7.24676	1.19492	4.11587	10.4367	5.7949
AKAP7	0		0	0.674729	0.492499	0.985382	7.55096	7.18527		0	0.739597	0.0775784	0.379322	2.72612	2.54025		0	-0.637331	0.259437	0.402599	7.4654	7.7265
AKAP8	0		0	2.10383	0.312929	0.243018	8.00438	7.87848		0	1.11386	0.083313	0.208999	3.98936	3.92373		0.00191199	4.66978	0.130053	0.144227	9.8048	9.36245
AKAP8L	0		0	2.03036	0.313263	0.557687	7.08909	6.5916		0	1.25683	0.0663637	0.316087	4.76191	4.40338		0	0.713097	0.178671	0.217999	10.1463	10.1473
AKAP9	0		0	-1.45683	0.986828	0.403259	8.67744	8.85512		0	-1.60761	0.0958829	0.228614	4.21274	4.50426		0	-0.398168	0.335326	0.777366	9.7954	9.92365
AKIRIN1	0		0	0.276399	0.484004	0.718094	8.20877	8.1337		0	3.348	0.0713891	0.0682862	4.66574	4.34147		0	0.301021	0.118423	0.395368	10.034	9.99355
AKIRIN2	0		0	-0.882077	0.369568	0.556835	7.69993	7.87704		0	-0.362832	0.105397	0.179515	3.79203	3.80516		0	-3.08157	0.124907	0.330017	9.2095	9.86845
AKNA	0		0	1.98388	1.41381	1.8241	6.39844	5.98935		0	0.292528	0.152037	0.857255	3.72805	3.82344		0	0.991944	0.398438	1.18406	9.8779	9.82165
AKNAD1	0		0	-1.29322	0.0100528	0.0950835	2.97026	2.96255		0	0.698084	0.0368061	0.0648644	0.397259	0.294877		0	3.85451	0.97688	1.04795	3.9104	2.46855
AKR1A1	0		0	-3.13085	0.227389	0.694511	9.86591	10.4462		0	-4.10225	0.142219	0.147567	5.31336	5.94655		0	-3.02467	0.167721	0.505308	10.6925	11.3412
AKR1B1	1		8.78331	-8.91174	0.475774	0.372866	8.93943	10.1327		0	-4.69711	0.0972166	0.776365	4.23165	5.34905		3.28839	-7.41158	0.358123	0.787359	9.6409	11.4312
AKR1B10	0		0	1.02238	0.870501	0.675348	2.38258	2.38767		0	0.28552	0.71004	1.09142	0.950963	0.825319		0	1.48471	3.47548	3.89426	4.0611	2.7266
AKR1C1	0		0	-3.43559	3.03177	5.85404	6.92807	8.60319		0	-2.84736	1.60401	2.866	1.71246	3.13477		0	-2.06094	3.15416	4.79869	6.2248	7.37775
AKR1C2	0		0	-3.50389	3.21053	5.57305	6.5817	7.79465		0	-2.7287	1.10094	1.51021	1.29544	2.53261		0	-2.43148	2.22507	6.817	4.1784	5.5152
AKR1C3	0		0	0.120459	5.3278	6.18287	7.98753	8.11744		0	-0.790564	2.00816	2.79925	3.57641	3.51619		0	0.287568	1.91721	4.10845	8.4647	8.2936
AKR1C4	0		0	-2.205	0.00017713	0.000428095	2.49084	2.49582		0	-2.16877	0.00246137	0.0354671	0	0.0510246		0	-1.26878	0.267894	0.601226	0	0
AKR1D1	0		0	0.254467	0.00391984	0.000995067	2.58507	2.59402		0	-0.373243	0.0231926	0.0392119	0.595485	0.645439		0	2.45774	1.72961	0.570286	0.4874	0
AKR1E2	0		0	-2.06264	0.36074	0.484608	4.05332	4.25226		0	-1.51358	1.66898	1.40656	2.83544	2.82099		0	-0.899862	2.39009	3.70089	4.7374	5.60855
AKR7A2	0		0	-3.72772	0.613393	0.675642	8.34493	9.06009		0	-2.27798	0.193237	0.270747	4.01452	4.3077		0	-3.79716	0.390642	0.476234	9.5996	10.0475
AKR7A3	0		0.737202	-4.59136	0.189682	0.286495	5.76963	6.12592		0	-2.16718	0.139778	0.396303	1.52465	1.87611		0	-1.20487	1.02693	0.390183	3.481	3.6179
AKT1	0		0	0.949671	0.444685	0.437038	8.93344	8.82981		0	0.492072	0.081393	0.0830299	6.11856	6.07201		0	0.117617	0.170137	0.241422	12.4361	12.2827
AKT1S1	0		0	-3.67117	0.758128	0.651298	5.9397	6.57002		0	-4.07008	0.154265	0.155013	3.36029	3.94771		0	-4.57555	0.210205	0.37559	9.962	10.5412
AKT2	0		0	-0.137438	0.617214	0.590261	7.2167	7.35751		0	-0.676377	0.134112	0.201074	4.34349	4.3039		0	-1.61046	0.195311	0.243164	11.2976	11.4583
AKT3	1		2.9391	5.83236	0.991254	2.59588	9.80017	8.60288		0	4.34928	0.0856938	0.660667	5.87848	5.06326		0.575972	5.14637	0.390363	1.94713	11.191	9.2691
AKTIP	0		0.663296	4.54628	0.498695	1.00868	8.06767	7.43721		0	3.72475	0.212208	0.319622	4.16928	3.3945		0	2.75248	0.279301	0.361336	8.8822	8.50105
ALAD	0		0	3.63852	0.381949	0.470286	7.9176	7.48152		0	1.54409	0.151655	0.126254	3.72566	3.45764		0	3.01718	0.24859	0.345569	10.4378	9.97145
ALAS1	0		0	0.965665	0.386895	0.520761	8.22133	8.0903		0	0.21423	0.0703817	0.483897	4.12322	3.90829		0	0.0232344	0.100057	0.302362	9.9133	10.0627
ALAS2	0		0	-0.342738	0.0154126	0.0444746	2.38686	2.39172		0	0.0873477	0.0211879	0.0757857	0.317343	0.210144		0	-1.63541	0.588256	2.32865	0.5726	0.74875
ALB	0		0	-1.39154	0.00833371	0.434688	2.72087	2.73078		0	-1.08433	0.110165	0.679701	0.312435	0.409481		0	0.704958	4.89097	7.8658	2.1546	0.99895
ALCAM	1		9.24661	9.0009	1.0754	3.47786	11.6727	9.42751		0	4.72894	1.03953	1.25183	6.13227	4.597		0	4.50315	0.946497	2.69269	11.5969	10.1476
ALDH16A1	0		0.774059	-4.61825	0.364802	0.47269	5.50355	6.05198		0.338056	-5.5574	0.263039	0.268589	2.31438	3.34142		2.17446	-6.46816	0.280655	0.414402	8.6301	9.6265
ALDH18A1	1		2.99712	-5.93652	1.18018	0.892458	8.24925	9.45924		2.1839	-7.69925	0.184751	0.178256	3.81553	4.83015		2.10063	-6.4064	0.187719	0.575721	9.7418	11.0494
ALDH1A1	0		0	2.05027	6.75653	5.00513	7.7661	5.95852		0	1.65549	3.57288	3.23185	5.30773	3.86556		0	1.92719	7.58544	5.30817	10.4334	7.98005
ALDH1A2	0		0	-2.04148	3.36375	6.5572	2.46267	2.47039		0	-1.1184	1.98083	2.66865	0.311185	1.36226		0	-1.32472	4.47605	6.71798	4.2254	4.55855
ALDH1A3	0		0	-3.66221	4.46774	11.0863	3.72021	5.49121		0	-1.01356	1.51631	3.51954	1.6813	2.03791		0	-1.73562	3.89862	9.82493	6.5346	7.48495
ALDH1B1	1		26.3425	17.8292	1.41051	1.50357	9.49657	4.68852		4.25112	10.5389	0.467592	1.03573	7.60542	4.1134		5.53221	9.43465	0.492698	1.67597	13.8988	10.4029
ALDH1L1	0		0.392324	4.48183	1.65467	0.690983	5.47326	4.65335		0	3.49782	1.15826	2.696	2.99395	0.283775		2.83355	7.02295	4.25218	7.00586	9.0441	2.76485
ALDH1L2	1		3.77199	-6.27714	1.39035	4.00919	4.03584	6.77683		0.212862	-5.42095	0.230402	0.528867	1.95862	3.29484		0	-3.74043	1.19192	2.39771	7.3616	9.27425
ALDH2	0		0	3.5655	1.27098	1.96617	9.48208	8.58392		0	3.34869	0.557462	1.70558	4.9811	3.80494		0	2.42852	0.966573	1.46069	10.982	10.0252
ALDH3A1	0		0	2.63099	0.0960019	0.00779326	2.51008	2.50582		0	2.88475	0.475079	0.466761	0.749905	0.0515985		8.46466	12.4513	2.36475	1.24664	5.9791	1.2053
ALDH3A2	1		5.93026	7.85654	1.92336	0.636936	10.032	8.15272		0	4.20142	0.715882	1.01294	5.70865	4.36335		5.3564	9.26861	0.581921	0.518376	11.9897	9.89375
ALDH3B1	0		0	0.19485	0.345469	0.323312	6.42934	6.42253		0	0.422513	0.178532	0.151591	3.07533	3.14268		0	0.363744	0.54057	2.37202	9.2428	8.9992
ALDH3B2	0		0	-2.10739	0.000300037	0.000340753	2.61812	2.63005		0	-1.0626	0.000278803	0.00306387	0	0		0	-1.29697	0.568804	1.19726	1.2789	1.39475
ALDH4A1	0		0	2.67336	1.67242	0.826997	3.25756	2.6404		0	2.37405	0.952038	0.808254	3.25843	2.2185		0	3.62499	0.880241	1.39577	9.7121	8.58005
ALDH5A1	0		0	-2.00463	0.995518	3.0099	2.54454	2.53167		0	0.599989	0.208003	0.540543	1.73786	1.64813		0	-0.539572	0.855909	3.82236	6.6728	7.52665
ALDH6A1	0		0	2.99956	0.727383	0.934605	8.77262	8.23753		0	2.55512	0.157274	0.139304	4.11569	3.84547		0	4.09203	0.539509	0.631546	8.1555	7.34505
ALDH7A1	0		0	0.556691	0.327701	0.363098	8.93043	9.02688		0	-2.66636	0.278308	0.0734667	3.28838	3.76723		0	-2.71551	0.275854	0.332428	9.5466	10.0047
ALDH8A1	0		0	1.97084	1.96608	0.898612	2.50411	2.46546		0	2.22288	0.226813	0.390907	1.72334	1.04254		0	3.9605	1.2001	1.90203	4.9299	3.22745
ALDH9A1	0		0	-3.41573	0.187896	0.34145	10.4367	10.6291		0	-0.729891	0.0738619	0.275972	5.18011	5.22812		0	0.331878	0.14961	0.342422	10.8029	10.7305
ALDOA	0		0.524407	4.46693	0.39452	0.516954	13.1261	12.6185		0	3.06495	0.126967	0.465808	8.74519	7.90667		0	1.00431	0.246926	0.890589	14.8518	14.9317
ALDOB	0		0	0.774744	0.750642	0.12139	3.15296	3.1916		0	0.652209	0.257843	0.15186	0.514863	0.340634		0	2.06206	4.27099	2.14909	2.3045	1.52645
ALDOC	0		0	-1.71357	2.41152	2.19405	2.98004	3.57884		0	-0.225701	1.31558	0.88852	1.36639	1.80738		0	-2.84122	4.20797	3.37123	5.6335	7.2914
ALG1	0		0	-2.41856	0.0997625	0.105039	6.05792	6.19193		0	-1.23971	0.0853237	0.04723	2.64418	2.74577		0	-1.57697	0.14896	0.185761	8.8318	9.03345
ALG10	0		0	0.299286	0.429325	0.278981	2.62679	2.63661		0	0.524577	0.128424	0.0896595	3.06614	3.05955		0	-0.736048	0.409996	0.493193	6.0678	6.2044
ALG10B	0		0	-2.23472	0.802363	1.0038	5.06751	5.35326		0	1.08072	0.10724	0.0743747	3.1434	3.00167		0	0.553941	0.344548	1.42277	7.6039	7.82405
ALG12	0		0	-1.2661	0.57172	0.607522	4.85093	5.01174		0	-2.44281	0.142827	0.0671843	3.71333	3.96513		0	-1.2275	0.257248	0.182245	9.3635	9.41935
ALG13	0		0.252483	4.29671	0.279036	0.390665	9.20392	8.6709		0	2.68009	0.0699384	0.158439	4.97685	4.60771		0	2.12783	0.230234	0.150497	9.0772	8.8434
ALG14	0		1.16577	-4.86999	0.69448	0.668716	6.82647	7.76893		0	-5.08753	0.121399	0.144703	2.94977	3.69007		1.45683	-5.87276	0.33693	0.482393	6.6483	7.67095
ALG1L2	0		0	-0.820957	0.0415227	0.0850649	2.42084	2.43042		0	2.226	0.134937	0.133497	1.64543	1.26646		0	-2.23958	0.103968	0.433665	0	0.22295
ALG2	0		1.85063	-5.23192	0.213561	0.450342	9.14385	9.69405		0.400229	-5.62544	0.0715731	0.185913	3.60905	4.30604		0.428817	-5.02461	0.178202	0.276036	8.8051	9.50615
ALG3	0		0	-2.35768	0.415203	0.797823	6.40317	6.84382		0	-3.143	0.148411	0.404136	3.67799	4.23788		0	-3.47421	0.200639	0.62124	9.2827	9.75345
ALG5	0		0.60702	-4.53876	0.393821	0.356821	9.39729	9.95491		0	-1.3734	0.285285	0.150496	3.88464	4.20827		0	-3.95931	0.219347	0.330477	8.4525	8.95035
ALG6	0		0	-2.50925	0.508094	1.07058	6.98542	7.56171		0	-0.272147	0.141992	0.237793	3.19145	3.23765		0	-1.99432	0.277418	0.401835	7.4892	7.875
ALG8	1		3.81846	-6.27168	0.365042	0.628859	6.75486	7.69494		0	-1.84218	0.14371	0.416987	3.91298	3.92912		0.680938	-5.23316	0.151653	0.486241	8.4986	9.4851
ALG9	0		0	0.667743	1.29631	1.01045	6.92041	6.80263		0	1.42002	0.153501	0.208538	3.46327	3.17376		0	2.85446	0.223203	0.163561	9.0891	8.69605
ALK	0		0	-2.80518	0.0187739	1.56725	2.42757	2.44576		0	-2.33861	0.0188989	0.383285	0.0907234	0.254586		0	-1.96424	2.2195	3.18767	0.4462	1.50015
ALKBH1	0		0	2.80371	0.335598	0.353957	8.30022	7.98212		0	1.39077	0.101309	0.181965	3.06405	2.6938		0	1.60919	0.199625	0.27782	8.3568	7.97865
ALKBH2	0		0	-1.87771	0.582002	0.889855	5.96204	6.27852		0	0.00984476	0.193918	0.19122	3.34229	3.24118		0	-1.90616	0.283772	0.60007	8.1618	8.262
ALKBH3	0		0	-1.52893	0.964598	0.864559	7.07049	7.26453		0	1.48563	0.131958	0.232055	3.81302	3.42231		0	0.52731	0.214578	0.486846	8.5775	8.6419
ALKBH4	0		0	-2.72676	0.172678	0.164338	4.00899	4.17078		0	-2.45042	0.0612716	0.0866971	2.65692	2.81162		0	-2.27775	0.23993	0.155312	8.2491	8.43775
ALKBH5	0		0	2.93561	1.82811	0.863759	9.93569	9.47961		0	1.01757	1.0057	0.472583	6.57182	5.98838		0	1.35184	0.688342	0.713457	12.2639	12.0425
ALKBH6	0		0	2.44599	0.969446	0.809036	8.1715	7.54237		0	0.913927	0.24886	0.103963	3.40079	3.26242		0	1.80636	0.429749	0.359116	7.581	7.14305
ALKBH7	0		0	0.0603407	0.524724	0.363024	8.74096	8.86033		0	0.858498	0.23298	0.237478	3.89922	3.8191		0	-1.07956	0.406364	0.826508	9.2815	9.4403
ALKBH8	0		0	-3.44486	0.327057	0.364099	4.31082	4.72988		0	-1.97918	0.192353	0.247395	2.18924	2.49309		0	-1.47666	0.328296	0.486656	7.2345	7.67235
ALLC	0		0	-1.46752	0.000161519	0.000268364	2.45148	2.4563		0	-1.44061	0.00210453	0.101171	0	0.0425194		0	-1.42462	0.156342	1.78148	0	0
ALMS1	0		0	0.48371	0.250328	0.353199	8.66844	8.54374		0	-0.448891	0.210248	0.163889	3.8881	4.08144		0	1.86914	0.324271	0.343829	9.2056	8.9375
ALOX12	0		0	1.48969	3.79234e-05	2.07724e-05	2.03398	2.03183		0	-2.73299	0.12447	0.0704221	1.21516	1.43448		0	1.71538	0.986422	1.02957	2.6842	2.436
ALOX12B	0		0	-0.183988	3.7703e-05	4.90118e-05	2.18251	2.18421		0	-1.07217	0.0132275	0.263773	0	0.0903168		0	-0.575125	0.543178	0.567359	0	0.5962
ALOX15	0		0	0.355399	0.00561277	0.0128507	2.29828	2.29366		0	-0.110115	0.0411646	0.0148052	0.24627	0.271595		0	2.34696	1.55953	1.11895	1.537	0.7366
ALOX15B	0		0	-1.22239	8.59555e-05	0.0418152	2.25845	2.26348		0	-1.45068	0.0421676	1.24372	0.132745	0.280271		0	-1.74521	2.77059	3.11393	2.895	3.7745
ALOX5	0		0	-1.7793	3.75325	4.73767	6.0422	7.64353		0	-1.82775	0.495497	0.411517	2.56979	3.25815		0	-1.67925	1.56012	2.26967	7.2417	8.09695
ALOX5AP	0		0	-2.66878	4.15505	5.10729	6.27751	7.855		0	-1.82995	0.800788	0.699067	3.01774	3.60487		0	-3.74649	1.53302	2.77991	6.8428	8.85045
ALOXE3	0		0	-1.66972	0.000169968	0.000484429	2.33278	2.33669		0	-0.124463	0.00172766	0.0015835	0.0226963	0.021531		0	-0.436641	2.15357	0.376324	0.8316	1.04395
ALPI	0		0	1.41885	0.0264462	0.00621192	2.25845	2.25314		0	-0.972357	2.49301e-05	0.000100506	0	0		0	0.443291	0.102036	0.0252327	0	0
ALPK1	0		0	2.35117	0.197505	0.261579	5.93902	5.76532		0	1.19334	0.298369	0.207447	3.31676	3.06092		0.0246441	4.68871	0.386689	0.566583	8.9621	8.17275
ALPK2	0		0	0.39287	10.7473	5.57474	2.82132	4.51173		0	-0.752304	3.44432	1.59029	0.605206	2.29071		0	-2.66866	14.5281	5.75727	3.4034	7.53715
ALPK3	1		4.25389	6.61505	3.75732	2.7991	6.46053	3.04926		0	4.03871	1.41461	1.04626	3.61291	1.72129		0	3.46065	2.09606	4.11106	10.767	8.58295
ALPL	0		0	-3.90084	0.582151	3.84144	2.92957	3.05976		0	-2.77651	0.31204	5.95694	0.955005	2.59655		0	-4.28562	1.67664	6.99469	7.0022	8.9625
ALPP	0		0	-1.26389	0.0159593	0.110066	2.40864	2.41335		0	-0.318527	0.0148408	0.0152087	0.402882	0.427111		0	-1.79755	0.0321627	0.560551	0	0
ALPPL2	0		0	-0.144767	0.223788	0.0562808	3.25136	3.28132		0	-0.713082	8.56106e-05	9.16426e-05	0	0		0	-1.81408	0.0500349	0.266399	0	0
ALS2	0		0	-2.31391	0.346544	0.981427	6.49465	7.08141		0	-2.02643	0.0855361	0.108869	3.53981	3.6799		0	-0.998943	0.155114	0.285734	8.7746	8.97215
ALS2CL	0		0	0.286124	0.304382	0.180142	6.41417	6.35738		0	4.50529	0.332189	0.591812	2.3795	1.03357		0	3.78227	1.66366	3.38964	8.2234	5.85475
ALS2CR11	0		0	1.96278	1.05107	0.384024	3.38254	3.30904		0	0.287711	1.33435	1.31628	2.15529	2.45937		0	1.30139	1.15381	3.8668	4.8883	4.36365
ALS2CR12	0		0	-1.92125	0.00194671	0.00357857	2.68479	2.70009		0	-0.765607	0.322723	0.10049	0.964664	1.1992		0	0.351305	0.845671	0.624721	2.3181	2.1791
ALX1	0		0	-2.41652	0.0875397	1.79342	2.12063	2.12293		0	-0.249019	0.578628	0.451817	0	0.0879873		0	-2.30919	1.40945	9.20379	0	0.8375
ALX3	0		0	-1.96997	0.00467138	0.199036	2.08925	2.09381		0	-1.49842	0.121967	0.177827	1.94868	2.37872		0	1.9975	0.449142	2.66333	5.0244	4.406
ALX4	0		0	-0.984206	2.23816e-05	0.000920239	2.02344	2.02284		0	-2.94229	0.00913771	0.320951	0.184526	0.581718		0	-2.52279	0.957146	7.1113	0.4448	0.67695
AMACR	0		0	-4.0156	0.408199	1.04253	4.98971	5.35099		0	-3.44178	0.148915	0.687687	2.863	3.46115		0	-1.94803	0.268009	0.712455	8.141	8.5728
AMBN	0		0	-1.49737	0.000111949	0.00763509	2.32519	2.32784		0	-0.858584	0.00114141	0.0146173	0	0		0	-0.847995	0.224141	1.9217	0	0
AMBP	0		0	-1.04414	0.000198078	0.000784564	2.29943	2.30093		0	-1.89509	0.0127988	0.433103	0.14307	0.289922		0	-1.10646	3.01054	3.71494	0.6044	1.20495
AMBRA1	0		0	-3.50204	0.133205	0.0896801	7.3974	7.59154		0	0.0227168	0.0837402	0.1106	3.70494	3.76829		0	1.68124	0.192565	0.270456	9.8019	9.4918
AMD1	0		0	1.09553	0.281427	0.227806	9.34096	9.20481		0	1.39014	0.0902721	0.205655	5.19923	4.82097		0	0.347198	0.274558	0.630816	10.4834	10.1439
AMDHD1	0		0	-0.51543	0.0632244	0.79948	2.22084	2.22077		0	-0.309067	0.258535	0.375709	0.631942	0.45846		0	1.36001	2.9006	2.07594	4.0518	3.67955
AMDHD2	0		0	-1.30257	0.815287	0.845974	4.7079	4.82238		0	-0.820027	0.222223	0.520312	3.76359	3.73957		0	-1.02608	0.28259	0.602506	8.1158	8.30785
AMELX	0		0	-1.44595	0.000468611	0.401322	2.57433	2.57841		0	3.92544	0.197225	0.0573657	0.730457	0.299593		0	-0.491771	0.128524	0.439553	0	0
AMELY	0		0	-0.60578	0.000117176	0.00012147	2.15289	2.15526		NA	NA	0	0	0	0		0	-0.441658	0.00627052	0.00982802	0	0
AMFR	0		0	-1.38134	1.24639	0.99829	4.41999	4.67378		0	-1.46214	0.144794	0.109607	5.14736	5.2522		0	-1.48314	0.291253	0.203524	10.8253	11.0717
AMH	0		0	-1.09692	1.41691	1.30452	2.3649	2.39003		0	-0.707481	1.47579	2.56117	1.20153	1.35178		0	0.191074	4.00677	3.25941	4.5249	4.26375
AMHR2	0		0	-0.707414	0.0213014	0.0162754	2.87525	2.89391		0	-0.471367	0.00462616	0.00969827	0.0115881	0.0308649		0	1.30992	1.01542	0.557029	0.4483	0.2359
AMIGO1	0		0	-1.93629	0.0344691	0.486574	3.12974	3.14663		0	2.07142	0.468742	0.493441	1.61221	1.18181		0	1.45325	1.61652	3.80044	5.5547	5.2383
AMIGO2	1		14.2397	11.2234	2.65401	5.03796	10.2576	5.92064		0	3.38043	0.66119	2.80581	4.11369	2.08942		0	4.15897	1.30314	5.82921	10.0128	7.01465
AMIGO3	0		0	-1.66373	0.455822	0.392262	6.73967	7.07533		0	0.721232	0.138312	0.158346	2.38482	2.27255		0	0.0416245	0.647107	0.572309	7.4644	7.28105
AMMECR1	1		5.48994	-7.21347	1.58747	1.36966	6.58178	8.37082		1.15789	-6.47427	0.158641	0.219357	2.20657	3.18046		1.9253	-6.2607	0.786507	0.743331	6.9427	8.6218
AMMECR1L	0		0	-2.24338	0.330564	0.333751	8.6884	8.78805		0	-4.10477	0.0871098	0.0840474	3.29282	3.74453		0	-1.77623	0.234244	0.294308	9.2314	9.41895
AMN	0		0	-0.826148	0.483036	0.688542	4.13107	4.08799		0	-1.84717	0.014674	0.0647492	0.0772665	0.162197		0	-3.8961	0.732215	0.679506	0.5178	1.802
AMN1	0		0	4.18541	2.2558	0.890012	3.84021	2.42332		0	5.03251	0.351413	0.110233	3.55044	2.61363		0	4.40714	0.266839	0.433486	7.62	7.0018
AMOT	0		0	-1.78196	0.000225635	0.000990883	2.48943	2.49553		0	-0.177428	0.208658	0.685658	2.83093	2.99359		0	1.71696	1.0105	3.39288	8.9934	8.34755
AMOTL1	0		0	3.64704	0.491519	0.577971	10.2534	9.65888		0	3.68564	0.0830337	0.449187	5.1634	4.30015		0.0854359	4.73924	0.371292	1.16473	11.9643	10.347
AMOTL2	0		0	-0.181251	1.29186	1.61227	8.36843	8.28121		0	0.352072	0.832962	0.515361	3.79727	3.33094		0	-0.00949472	0.557517	1.35608	10.0704	9.9801
AMPD1	0		0	-0.736544	2.15949	3.47058	2.02904	2.03126		0	0.296385	0.0482676	0.0137445	0.062698	0.0762976		0	-1.73962	0.836888	13.4535	0	0
AMPD2	1		8.65431	-8.73222	0.292397	0.997847	6.19317	7.57779		1.57269	-6.95745	0.221997	0.317576	3.23376	4.74134		2.27541	-6.55253	0.463022	0.517103	9.6363	10.9467
AMPD3	0		0.614746	-4.51629	1.88117	3.61258	4.46318	6.09528		0	-4.89254	0.298896	0.180747	1.7206	2.63777		0.0252383	-4.68921	1.49984	2.40961	6.2832	7.85375
AMPH	0		0	0.207004	4.68554	8.04701	6.93945	6.85639		0	-1.64653	0.883765	3.64957	2.6698	3.20979		0	0.676548	4.76447	4.34335	8.8127	8.45785
AMT	1		2.05215	5.37696	1.42441	1.37459	5.91794	4.41262		0	4.17451	0.236069	0.299101	3.61897	2.63427		0	4.31	0.901468	1.4181	7.6281	6.26205
AMZ1	0		0	-1.34071	0.0586851	0.115472	2.94888	2.97104		0	-2.85513	0.120929	0.281852	0.780994	1.23594		0	-1.64395	1.29489	5.36543	2.8049	3.4138
AMZ2	0		0	2.11803	0.639136	0.35428	10.6215	10.158		0	2.2535	0.324079	0.0955517	5.29156	4.88162		0	3.56971	0.234732	0.115434	10.5297	10.2301
ANAPC1	0		0.507056	-4.46254	0.207535	0.604318	7.1341	7.54118		0	-2.91792	0.0373029	0.0961605	4.01948	4.27481		0	1.44792	0.279462	0.325983	9.1938	8.89615
ANAPC10	0		0	-0.854021	0.706712	1.03174	8.00777	8.0676		0	0.614256	0.0629287	0.0977041	3.6512	3.57731		0	-0.567226	0.173299	0.357346	7.0135	7.18075
ANAPC11	0		0	-0.452664	0.365077	0.390128	10.974	11.0859		0	0.71095	0.394051	0.243291	5.54939	5.30411		0	-1.83014	0.328708	0.631644	10.6031	10.8143
ANAPC13	0		0	1.14647	0.200891	0.250374	10.715	10.6075		0	-0.804969	0.0830566	0.197552	4.90191	5.03295		0	-2.20779	0.165681	0.207208	9.8425	10.2352
ANAPC16	0		0	2.2147	0.330296	0.2172	10.8086	10.5472		0	4.3449	0.388741	0.0745787	4.71312	4.06231		0	3.14109	0.274773	0.252719	10.9357	10.4218
ANAPC2	0		0	-0.646847	0.64484	0.620471	6.36878	6.45576		0	-1.79451	0.130967	0.164027	3.66909	3.76844		0	-0.0641589	0.195161	0.20789	9.7833	9.70275
ANAPC4	0		0	-0.063615	0.333145	0.171218	9.16259	9.11603		0	0.676242	0.127768	0.12306	4.22044	4.06084		0	2.02248	0.170317	0.182951	8.945	8.61945
ANAPC5	0		0.15243	-4.26408	0.166892	0.131216	10.4507	10.7794		0	-2.99239	0.110943	0.108721	5.44657	5.64472		0.253214	-4.87898	0.124302	0.118596	11.0436	11.4862
ANAPC7	0		0	1.24347	0.347603	0.204228	8.53024	8.37198		0	2.13617	0.113405	0.242847	4.70672	4.33234		0	0.739231	0.269172	0.181191	10.2741	10.1311
ANG	1		6.30892	7.75429	2.02087	1.2713	5.73031	3.18308		0.44684	5.67672	0.300899	1.0355	4.01651	2.16491		0	4.45249	0.394031	3.01419	8.8385	6.79225
ANGEL1	0		0	-2.61061	0.217872	0.325999	5.93734	6.31097		0	-1.91389	0.0876286	0.201662	3.08902	3.40158		0	-0.69856	0.284774	0.316403	8.8215	8.90335
ANGEL2	0		0	4.01415	0.455715	1.09644	8.54692	7.82179		0.32366	5.54166	0.0485362	0.0841598	4.30922	3.69453		0	2.5	0.205825	0.377009	9.2109	8.90025
ANGPT1	0		0	2.54687	4.32657	1.40172	4.92733	3.72771		0	0.127655	2.69941	0.445163	2.53193	2.71246		0	0.797447	2.99949	3.89502	8.1137	7.4743
ANGPT2	0		0	-3.51973	1.79065	2.24131	4.58496	5.92107		0	-2.95748	0.38107	0.625683	2.34574	3.06404		0	-1.50913	1.73996	1.81196	8.0172	8.3781
ANGPT4	0		0	-1.64106	0.00437618	0.0367671	2.34684	2.35515		0	-2.11135	0.0168684	0.0319794	0.438743	0.523274		0	0.105609	1.29829	1.92839	0.6044	0
ANGPTL1	0		0	4.05693	7.85913	3.7379	6.08171	3.33322		0	3.66261	5.29686	0.634608	3.97118	2.40415		0	2.61293	15.4709	10.5112	9.549	5.4343
ANGPTL2	1		8.42741	-8.64959	2.49057	2.31333	8.31212	10.8835		0	-4.70608	1.02976	1.68327	4.31903	6.7715		0	-3.53634	0.830298	2.62528	10.9984	12.6193
ANGPTL3	0		0	-0.998709	0.00470165	0.00526697	2.85323	2.86139		0	-2.43192	0.123727	0.172361	1.20414	1.68587		0	-0.426299	0.676709	1.49506	0.5061	0
ANGPTL4	0		0	-3.42904	0.846459	2.51951	4.43632	4.72355		0	-1.0759	1.18362	2.67328	2.4246	2.83611		0	-1.40765	2.46053	3.07578	8.1421	8.9393
ANGPTL6	0		0	-1.78094	0.00468307	1.23203	2.1767	2.17779		0	1.31689	0.194066	0.194108	2.81732	2.60893		0	-3.71403	0.864895	1.64659	1.7701	3.10385
ANGPTL7	0		0	-1.43364	5.96537e-05	0.132129	2.11191	2.11205		0	-4.5775	0.0494324	0.0909928	0.929942	1.30504		0	1.89829	3.96604	1.57632	1.0705	0.6487
ANK1	0		0	-1.94655	0.255346	1.46907	3.46065	3.49334		0	-0.183133	0.589175	1.35498	1.39822	1.14248		0	-1.4852	5.32312	6.04686	7.6046	8.3123
ANK2	0		0	3.11693	4.23278	6.42583	8.2067	6.78162		0	1.99294	0.40342	1.55444	3.94499	3.26904		0	3.6185	2.83756	4.48511	10.3707	8.44165
ANK3	0		0	-0.459271	6.18231	5.36807	6.23664	5.91463		0	-0.7112	0.645129	0.732089	1.71925	2.21324		0	1.49479	3.79351	4.95095	7.3767	5.736
ANKAR	0		0	-1.29646	0.012586	0.0276283	3.27008	3.26999		0	2.63691	0.226867	0.18474	2.4864	2.13204		0	3.3502	0.502018	0.643521	5.3779	4.60345
ANKDD1A	1		6.72034	7.69733	1.01764	1.93019	7.12201	5.17557		1.50215	6.87422	0.264374	0.140036	3.08603	2.19555		2.06003	6.37267	0.493672	0.97766	8.9472	7.2123
ANKFN1	0		0	-1.46723	0.00328918	0.0202289	2.51765	2.52746		0	-2.25108	0.0289981	1.09426	0	0.292078		0	-3.78591	0.393793	1.6899	0	1.11925
ANKFY1	1		4.73113	-6.82465	0.546839	0.47311	8.19644	9.17984		0	-4.4785	0.202793	0.176777	3.34833	4.25033		0	-3.70593	0.173379	0.352455	9.9816	10.5915
ANKH	0		0	-1.56533	2.74424	1.2954	10.5564	10.4272		0	-1.12798	0.307759	0.405722	4.10749	4.56694		0	-0.696857	0.313143	1.54688	11.1516	11.5778
ANKHD1	1		3.22652	5.98811	0.224931	0.269121	10.145	9.51006		0	1.33948	0.103419	0.104179	5.0226	4.81458		1.10734	5.58484	0.215711	0.240506	11.0899	10.1956
ANKIB1	0		0	-3.44072	0.207603	0.333109	9.8656	10.2585		0	-2.82676	0.051206	0.152236	4.45669	4.84648		0	-1.14511	0.262151	0.515609	9.8957	10.1034
ANKLE1	0		0	-1.84247	0.0101973	0.245315	2.72003	2.72739		0	-0.197363	0.0500664	0.0959623	1.645	1.67998		0	0.969594	0.591516	0.890937	4.7955	4.5613
ANKLE2	0		0	-3.61946	0.301381	0.301324	7.44567	7.71434		0	-2.51072	0.152231	0.298293	4.33669	4.69326		0	-4.45401	0.139726	0.233697	10.4067	10.9063
ANKMY1	0		0	-1.33705	0.0761143	0.14144	4.54753	4.56208		0	0.680611	0.176259	0.133681	2.14277	1.99735		0	2.30865	0.24477	0.323837	7.532	7.20685
ANKMY2	0		0	-3.17803	0.396157	1.15306	8.59487	9.18506		0	-2.65805	0.164604	0.341941	3.38634	3.83392		0	-0.66345	0.396955	0.247179	8.6366	8.7365
ANKRA2	1		4.7269	6.82789	0.364471	0.308778	8.31328	7.34332		0.201213	5.40825	0.140174	0.0578474	3.91728	3.31915		0.0245333	4.68859	0.0856781	0.658927	8.4841	7.33395
ANKRD1	0		0	-0.307049	0.0011351	0.00261416	2.38415	2.38722		0	0.829135	0.771372	0.382749	0.646716	0.38052		0	-2.31445	4.73965	14.537	3.0931	6.11575
ANKRD10	0		0	0.260787	0.875652	0.811072	9.55143	9.44528		0	-0.139528	0.186719	0.221306	6.02447	6.02028		0	1.30185	0.348722	0.388712	10.9486	10.712
ANKRD11	0		0	-4.01678	0.174856	0.260666	8.28223	8.57453		0	-1.37384	0.178043	0.207114	3.40492	3.43685		0	0.528133	0.154801	0.368857	11.2874	11.2962
ANKRD12	0		0	1.5072	1.2275	0.515185	8.30978	8.11668		0	2.25887	0.165248	0.127	4.3481	4.02232		0	1.39457	0.28441	1.40745	10.0296	9.74625
ANKRD13A	0		0	-1.0409	0.336698	0.392762	9.78719	9.82758		0	-0.0790058	0.146359	0.215704	4.47453	4.3897		0	-0.927659	0.177238	1.09503	10.4282	10.6173
ANKRD13B	0		0	0.718824	0.461159	0.901067	5.47092	5.03735		0	0.401392	0.203446	0.261355	2.62879	2.62012		0	2.67592	0.427685	1.05845	8.694	8.37435
ANKRD13C	0		0	-2.26632	0.223392	0.394081	8.31884	8.48841		0	-1.59037	0.116199	0.297014	3.73019	3.9626		0	-1.37414	0.106318	0.17691	9.1889	9.2869
ANKRD13D	0		0	-3.49521	0.863684	0.59393	5.7186	6.39788		0	-2.3642	0.0881536	0.146657	3.64476	3.89443		0	-3.32072	0.187244	0.26503	9.293	9.74995
ANKRD16	1		3.79214	-6.38229	0.185124	0.982496	3.40862	4.1176		0	-1.60655	0.0870232	0.160741	2.23818	2.31946		0	-2.96908	0.394616	0.319247	6.353	6.8368
ANKRD17	0		0.151198	-4.25387	0.307603	0.275351	9.38809	9.79771		0	-3.0891	0.0634108	0.187023	4.45976	4.82632		0	-0.181421	0.287703	0.782297	10.5716	10.3985
ANKRD2	0		0	-0.770922	0.938508	2.99212	2.51901	2.52924		0	-1.34188	0.359785	0.840693	0.0665137	0.223513		0	-1.83464	4.98322	8.8775	0.5172	1.79595
ANKRD22	0		0	0.522865	2.97471	1.9704	2.69919	2.71584		0	-0.242823	0.290356	0.520575	0.657843	0.68919		0	-1.38594	4.6773	8.40528	4.6181	4.8608
ANKRD23	0		0	-1.24869	1.93019	3.68123	3.36657	3.45415		0	-0.879514	0.160072	0.146838	2.24411	2.48228		0	-1.32321	0.452915	7.83855	5.1643	5.2061
ANKRD24	0		0	-0.483285	0.0138897	0.0146235	2.4432	2.44611		0	1.06094	0.405397	0.361679	0.736096	0.401356		0.307436	4.92397	1.8412	1.2569	5.8992	4.7528
ANKRD26	0		0	-1.05274	0.406327	0.471276	3.56603	3.64708		0	0.0981283	0.137655	0.17288	2.99699	2.87673		0	0.6522	0.396203	0.737754	7.2656	7.0482
ANKRD27	0		0	-0.13445	0.785947	0.631472	8.73797	8.82103		0	-1.60377	0.208942	0.150113	3.43564	3.64301		0	0.0498479	0.283353	0.28884	9.6011	9.56525
ANKRD28	0		1.64426	-5.13439	0.836159	0.920318	8.74954	9.90992		2.41404	-7.98892	0.203491	0.0825987	3.49218	4.29352		0.242794	-4.87031	0.454697	0.871164	9.2248	10.3674
ANKRD29	0		1.02809	4.7804	4.19098	4.48017	7.51869	4.23537		1.6796	7.08452	0.751815	0.18171	3.43448	2.07637		2.25783	6.53786	1.4157	2.82302	8.583	5.04805
ANKRD30A	0		0	-0.394027	0.000212197	0.000320732	2.4204	2.42289		0	-0.714129	0.00218047	0.00293688	0.0134732	0.0218664		0	-0.614861	0.0219823	0.0446896	0	0
ANKRD30B	0		0	-1.57214	0.0321559	0.0679859	3.24199	3.25304		0	-0.353248	0.0916626	0.0665473	0.0356033	0.0598751		0	-1.85654	0.592232	3.1363	0	0.41145
ANKRD31	0		0	-0.912507	0.000897909	0.000734885	2.54397	2.55415		0	1.43029	0.164964	0.124367	0.606888	0.300688		0	2.14131	0.824486	0.80698	1.3333	0.55885
ANKRD33	0		0	-1.80255	0.000414468	0.000486903	2.59381	2.60496		0	-1.50132	0.00178464	0.00812488	0	0.0354083		0	-1.99376	0.0940437	1.5478	0	0.2416
ANKRD34A	0		0	0.387159	0.347296	0.123949	2.28518	2.28179		0	2.75609	0.109076	0.0740048	1.24057	0.897004		0	2.88594	0.871615	0.92643	6.6561	5.77635
ANKRD34C	0		0	1.11671	0.174443	0.000176621	2.32009	2.32149		0	0.292595	0.0927941	0.106016	0.0397556	0.0170084		0	3.4855	4.13048	0.209124	0.5033	0
ANKRD35	0		0	0.372616	2.75321	2.03924	5.67977	5.19299		0	2.68346	0.719119	0.469823	1.62996	0.667743		0	2.21225	3.62434	2.44997	8.2151	6.59415
ANKRD36	0		0	1.5528	1.2099	1.13395	6.55516	6.35375		0	1.23418	0.22658	0.441543	4.25642	3.72776		0	2.4288	0.549353	0.375023	7.8695	7.5063
ANKRD36B	0		0	2.08371	1.42484	1.13919	9.51823	8.89111		0	1.6082	0.18898	0.345313	3.54699	3.24088		0	2.77413	0.708813	0.827277	5.1406	4.58535
ANKRD37	0		0	1.36676	1.57132	2.09074	7.2261	6.80324		0	0.125057	0.480755	0.72416	3.34376	3.36791		0	-0.519111	0.712128	1.65063	6.8881	7.01275
ANKRD39	0		0	-0.655827	0.534064	0.583125	3.81725	3.90157		0	-1.03215	0.142959	0.102076	2.97912	3.14406		0	-2.88546	0.208404	0.655488	6.9345	7.58005
ANKRD40	0		0	3.01189	0.38261	0.309674	8.37364	7.95334		0	3.67531	0.107293	0.288615	5.18766	4.5822		0	3.65091	0.158283	0.29259	11.1217	10.4696
ANKRD44	0		0	2.94014	0.793933	1.77189	8.39341	7.83558		0	0.117261	0.0977038	0.268881	4.15751	4.00965		0	0.874416	0.792193	2.59358	6.977	6.62435
ANKRD45	0		0	2.95968	2.75766	0.512259	2.62621	2.59721		0	4.02438	1.06521	0.0327658	1.02973	0.775629		0	4.07117	6.73758	3.32998	4.7989	2.35245
ANKRD46	0		0	-1.07771	0.558804	1.19632	7.70735	7.96342		0	1.39507	0.258021	0.158493	3.37787	2.97731		0	0.0439435	0.257932	0.68427	8.002	7.8474
ANKRD49	0		0	2.56504	0.427497	0.518405	7.92224	7.68233		0	2.39161	0.100998	0.246449	3.53467	3.19238		0.45447	5.04602	0.199211	0.122935	7.9837	7.4252
ANKRD50	0		1.2275	4.88089	0.965419	1.41065	10.2373	9.21401		0	2.33934	0.518371	0.476073	4.66521	4.17609		0.806613	5.33665	0.571668	0.786383	10.5963	9.26005
ANKRD52	0		0	-3.79504	0.252601	0.287116	5.48596	5.76225		0	-5.03946	0.140019	0.066977	3.03912	3.53203		0	-3.51516	0.265208	0.380512	10.0331	10.5474
ANKRD53	0		0	-0.604083	0.100223	0.0893481	2.68066	2.72397		0	2.0073	0.176273	0.0988679	0.989411	0.675231		0	3.38339	2.0456	1.66183	5.5978	3.63345
ANKRD54	0		0	0.0147624	0.69032	0.758475	6.43394	6.44867		0	-1.89142	0.125245	0.0632169	3.70668	3.78145		0	-0.512065	0.150805	0.323009	9.0516	9.17655
ANKRD55	0		0	-1.65654	0.0809899	0.755407	2.48827	2.49161		0	-1.33714	0.00547604	0.0645889	0.0578695	0.0624106		0	-0.749023	1.15264	1.1962	0.9572	0.9657
ANKRD6	0		0	2.89849	2.36702	2.18283	6.89132	5.53014		0	-0.467356	0.343978	0.532232	2.55321	2.27863		0	3.50531	0.854993	1.94945	8.266	6.9927
ANKRD7	0		0	-1.50205	0.000293436	0.000204515	2.33335	2.33783		0	-2.25881	0.237487	0.423161	0.722356	1.22279		0	-0.623187	1.68688	2.74279	2.1408	2.09505
ANKRD9	0		0	1.50078	1.2511	1.57809	9.63817	9.25972		0	-0.476693	0.384632	0.457542	3.40819	3.37396		0	-0.21237	0.743215	0.837137	7.3234	7.21605
ANKS1A	0		0	2.52149	0.618885	0.802338	9.25775	8.75598		0	1.64934	0.385968	0.201672	3.51896	3.14797		0	3.38097	0.478478	0.691564	10.3358	9.5386
ANKS1B	0		0	0.785939	1.60387	3.56881	3.10752	2.77318		0.824178	6.09517	0.527216	0.739945	3.3679	1.40557		5.00672	8.94258	0.811227	2.37063	6.363	3.1231
ANKS3	0		0	-1.20535	0.295474	0.343915	5.854	6.03774		0	0.74025	0.141001	0.106047	2.85039	2.76693		0	-0.337917	0.220476	0.528579	8.6863	8.7474
ANKS4B	0		0	0.548452	7.98733e-05	2.50765e-05	2.15879	2.15931		0	-1.01491	0.0224058	0.052767	0.907104	0.935733		0	1.28035	0.457708	0.383276	0.5202	0
ANKS6	0		0	-0.248207	0.385234	0.365505	7.01107	7.17874		0	-1.40525	0.272874	0.468968	3.03273	3.21634		0	-0.486021	0.522411	1.11624	9.0832	9.28725
ANKZF1	0		0	-0.28748	0.399018	0.412746	6.59825	6.54316		0	1.40398	0.186063	0.218145	3.76091	3.36651		0	0.461499	0.261057	0.197917	9.0599	9.0545
ANLN	0		0	3.97581	1.641	5.02694	10.6557	9.76963		0	0.999632	1.05035	0.900447	5.78854	5.11422		0	1.66704	1.47234	1.21069	11.1108	10.6009
ANO1	1		4.57441	6.66653	3.77395	5.05296	7.39641	2.75906		0.51219	5.74848	1.2512	0.816858	4.23628	1.9003		0	3.00358	1.94272	7.77374	11.0402	7.8387
ANO10	0		1.76849	5.20887	0.57558	0.604233	7.87026	7.07563		0.997333	6.29066	0.226542	0.210767	4.9729	4.0436		0	4.51739	0.277916	0.315093	10.112	9.542
ANO2	0		0	-1.68193	8.11424e-05	0.390137	2.36538	2.36669		0	-0.716622	0.281158	0.303623	0.899901	0.826079		0	0.177041	1.69724	3.3327	3.861	3.265
ANO3	0		0	3.28965	2.66375	0.0308056	2.4232	2.40316		0	3.33311	2.17251	0.486963	1.80924	0.385693		0	3.47239	7.89187	7.5372	6.2233	1.98155
ANO4	0		0	-2.20653	0.136279	1.65625	2.77014	2.79781		0	-3.05947	0.107035	2.42443	0.0857744	2.28785		0	-2.10365	2.11828	9.75867	1.1987	1.7605
ANO5	0		0	2.23359	3.77269	2.79923	3.08763	2.76052		0	5.13689	2.27329	0.475719	2.79269	0.224164		0	2.89568	13.8959	7.33024	7.9055	2.3208
ANO6	0		0	0.115388	0.374306	0.266021	9.86442	9.76053		0	0.360541	0.111346	0.0748753	5.5593	5.54673		0	1.78781	0.323748	0.480713	11.5873	11.2105
ANO7	0		0	-2.39551	0.000416665	0.0649422	2.40668	2.41641		0	-1.56194	0.0583632	0.122914	0.439907	0.634039		0	-4.37372	0.717483	1.27021	3.5126	4.8953
ANO8	0		0	0.626333	1.15017	1.16463	4.15195	4.11993		0	0.140333	0.38187	0.708687	2.96502	3.14015		0	2.99832	0.570342	0.902629	8.894	8.09705
ANO9	0		0	-0.51422	0.0214693	0.0580147	2.22008	2.22442		0	-1.45892	0.173849	0.658813	0.537106	0.817446		0	-0.418969	3.02805	4.86521	3.7069	3.57335
ANP32A	1		2.11773	5.38049	0.213706	0.47071	9.83744	9.19084		0	3.49717	0.114225	0.161887	5.25159	4.85224		0	-0.529388	0.105175	0.281947	11.1287	11.1935
ANP32B	0		0	0.134893	0.14506	0.260389	12.6135	12.7709		0	-1.29343	0.147534	0.366155	4.30269	4.33766		0	-2.15387	0.232614	0.573106	11.4733	11.6763
ANP32C	0		0	-0.370897	0.000419659	0.000432606	2.5522	2.55422		0	1.82852	0.063728	0.0124807	0	0		0	-1.17306	0.29375	0.874406	2.6779	3.01825
ANP32D	0		0	-1.18667	0.0184712	0.0125474	3.28126	3.34985		0	3.86461	0.145767	0.0201104	0.364156	0.18586		0	-0.61281	0.127458	0.326344	0	0
ANP32E	0		1.98197	5.30635	0.2092	0.302669	11.2872	10.7759		0	4.02557	0.130409	0.332039	5.25561	4.36457		0	3.19024	0.183206	0.192567	11.0753	10.6989
ANPEP	1		11.5717	-10.6531	0.871311	6.76388	3.06642	7.99937		1.27455	-6.60857	0.453377	1.5118	1.07312	3.42916		1.43956	-5.85853	2.81365	5.63508	6.8923	11.0279
ANTXR1	1		4.16518	-6.46435	0.988575	1.27411	9.98023	11.5425		0	-3.57775	0.397674	1.86112	4.64731	6.44958		0.857777	-5.37884	0.717388	0.959687	11.1886	12.4401
ANTXR2	0		0	-3.13114	2.03618	1.72372	9.63803	10.8118		0	-2.231	0.739878	0.262609	4.9641	5.50694		0	0.317504	1.26745	0.992363	11.0618	10.7886
ANXA1	0		0	-2.41101	0.825636	3.70403	11.4779	12.5577		0.484895	-5.71843	0.413353	0.350301	6.57266	7.69553		0	-2.09157	0.672161	2.32986	11.954	12.9174
ANXA10	0		0	1.03587	0.00374499	3.38546e-05	2.14703	2.14649		0	-2.05591	0.114331	0.104475	0.254243	0.538029		0	-2.24145	0.0877612	1.3276	0	0.25605
ANXA11	1		6.02933	-7.51557	0.479797	0.380487	9.58335	10.6325		0	-2.96237	0.217373	0.166112	4.94111	5.28102		0	-2.39476	0.139225	0.424121	11.1799	11.7462
ANXA13	0		0	2.42844	0.835906	0.00709136	2.12474	2.1226		0.275247	5.48875	0.46722	0.013898	0.753855	0.117093		2.63601	6.85561	5.44318	1.14031	4.3602	1.18355
ANXA2	1		8.11821	-8.4119	0.349039	0.960211	12.4795	14.0526		3.171	-8.98456	0.112471	0.248113	7.23191	8.63174		1.77044	-6.13221	0.216156	1.73598	12.0038	14.2255
ANXA3	0		0	-2.24539	1.55735	4.97459	2.38469	2.43199		0	0.62019	1.20523	1.43313	1.01352	0.474542		0	-0.0420466	2.28283	5.90616	4.8821	5.769
ANXA4	0		0	-2.11363	0.700516	1.1245	9.98299	10.4989		0	0.757893	0.264299	0.264801	4.72774	4.58416		0	1.55643	0.377365	0.28883	10.3928	10.0682
ANXA5	0		0.196081	-4.26284	0.242343	0.58967	11.6517	12.3139		0	-3.20278	0.160453	0.148542	7.6833	8.17337		0	-1.29487	0.181647	0.659139	13.2974	13.5537
ANXA6	1		5.05736	6.90032	0.748358	1.67948	10.3322	9.02896		0.785198	6.05149	0.0890659	0.345069	7.33135	6.09685		0	3.88277	0.172006	0.71148	13.9734	13.023
ANXA7	1		3.01867	-6.04509	0.67642	0.334804	9.64179	10.4038		0	-1.89735	0.634759	0.287671	4.99229	5.32699		0	-2.74926	0.166422	0.332705	10.6841	11.2143
ANXA8	0		0	2.07859	2.64824	0.194771	3.40808	3.34826		0	0.794868	0.304495	0.104331	0	0		0	1.25805	8.12382	3.87846	1.9384	1.8444
ANXA9	0		0	0.164193	0.0764689	0.0316339	2.25127	2.25441		0	0.46819	0.0994816	0.109391	1.49076	1.48217		0	3.40125	0.268816	0.798826	4.4945	3.7593
AOAH	0		0	-1.19241	1.55836	2.73802	5.03353	5.16297		0	-1.67132	0.709642	1.28953	2.76632	4.03212		0	-2.92806	2.98415	1.95311	6.8106	7.65935
AOC2	0		0	-1.44122	0.0140261	0.641367	2.23834	2.2383		0	1.43938	0.121041	0.105249	1.10618	0.868261		0	1.70394	0.721273	2.44326	4.2441	3.70385
AOC3	1		17.591	13.2475	1.2643	4.73789	11.2026	6.03784		1.70624	7.11641	0.712929	2.84747	6.60193	2.11106		10.3829	14.7317	0.986107	1.74889	13.9758	8.56715
AOX1	0		0	-1.30269	4.2115	6.34201	3.97988	4.28699		0	1.54784	2.7057	3.28213	3.58134	1.4256		0	3.55577	5.76768	7.45273	9.2369	5.78605
AP1AR	0		0	-0.970901	0.697778	0.749037	6.08062	6.02029		0	-0.94388	0.140679	0.221313	2.59445	2.82507		0	0.481914	0.298726	0.1465	8.4639	8.44485
AP1B1	0		0	-3.14004	0.319942	0.351129	6.72332	7.18794		0.044044	-5.23833	0.0874223	0.181106	4.31213	4.92097		0	-4.00191	0.132452	0.283486	11.0583	11.5402
AP1G1	0		0	-2.96978	0.357436	0.277705	7.75533	8.16116		0	-1.61172	0.121761	0.141263	4.01633	4.22608		0	-1.96855	0.171227	0.35348	10.0005	10.4621
AP1G2	0		0	2.37411	0.902609	1.06568	6.8942	6.4008		0	2.47465	0.233989	0.467568	3.99306	3.32265		0	1.7235	0.729872	0.661238	9.125	8.76925
AP1M1	0		0	-1.89538	0.316004	0.406931	8.64685	8.91468		0	-1.38219	0.125164	0.342709	4.64474	5.12247		0	-2.03112	0.143719	0.121291	10.8794	11.0571
AP1M2	0		0	0.832997	9.54367e-06	1.57741e-05	1.93575	1.93488		0	0.751189	0.179696	0.0522383	0.0795684	0.0452271		0	-1.56754	1.82387	3.43559	0.5843	1.4287
AP1S1	1		2.74395	-5.84853	0.661853	0.38903	6.13377	6.88443		0.613006	-5.86001	0.0808	0.19857	3.72467	4.75022		1.55364	-5.95278	0.315366	0.369841	8.8967	9.8476
AP1S2	0		0	1.6208	0.689442	1.56548	10.3139	10.4305		0	-1.26639	0.619034	0.216608	4.8079	5.07702		0	0.260847	0.631301	0.745092	9.5165	9.7428
AP1S3	0		0	-2.25738	0.00619463	0.0835479	3.02949	3.0662		0	-0.427639	0.039249	0.0425087	2.04963	2.0027		0	2.43894	0.515742	0.563752	5.1561	4.7562
AP2A1	0		0	-3.69879	0.288433	0.157705	6.13505	6.3932		0	-2.51501	0.283949	0.0576211	4.47287	4.67394		0	-4.08351	0.230917	0.0941699	11.2469	11.6593
AP2A2	1		7.40997	-8.07834	0.279555	0.32509	8.29505	9.29061		0	-3.30208	0.122138	0.146765	3.93371	4.16236		0	-2.78976	0.125691	0.216403	10.5966	10.9521
AP2B1	0		0	-1.24703	0.958886	0.808516	8.04737	8.33352		0	-1.10766	0.0886578	0.34416	4.8796	5.30879		0.326549	-4.93977	0.11725	0.117795	11.7434	12.2122
AP2M1	0		0	-0.784916	0.248229	0.324934	10.9735	11.12		0	-0.207467	0.159019	0.341234	6.99443	6.82376		0	-0.680329	0.14314	0.447899	13.2388	13.1419
AP2S1	0		0	-3.29026	0.720227	0.365478	10.1678	10.7655		0	-4.43964	0.265576	0.156863	5.42023	6.07244		0.890274	-5.40562	0.433839	0.88135	10.0703	11.0806
AP3B1	0		0	-3.70795	0.473528	0.365792	7.82352	8.20846		0.56708	-5.80913	0.121558	0.0607616	4.41028	4.91565		0	-1.44498	0.143271	0.331851	9.9731	10.0855
AP3B2	0		0	1.05643	1.04109	1.67485	2.80503	2.80444		0	4.07033	0.867118	0.426922	1.54674	0.308354		0.697058	5.24647	7.66372	5.77906	7.333	2.1439
AP3D1	0		0	-0.909966	0.415421	0.293165	10.1254	10.0677		0	-0.162096	0.131177	0.230569	4.61953	4.6955		0	-0.667683	0.223759	0.331969	11.7861	11.9301
AP3M1	0		0.449596	-4.42198	0.582589	0.742508	7.23308	7.93791		0	-2.02368	0.273185	0.0713407	3.62023	3.78219		0	-2.67754	0.174798	0.272495	9.2323	9.8611
AP3M2	0		0	1.3476	0.485764	1.05534	7.21884	7.09985		0	-0.701269	0.225542	0.274177	3.68417	3.73611		0	0.382805	0.28268	0.581311	9.1924	8.8448
AP3S1	0		0.346073	-4.39732	0.346679	0.244562	11.2429	11.7608		0.0599663	-5.2555	0.124586	0.109282	5.21998	5.89126		0	-3.75183	0.15114	0.443923	9.993	10.5787
AP3S2	0		0	0.0713307	0.477337	0.609854	8.36887	8.40139		0	3.43602	0.128129	0.0724566	3.62178	3.34614		0	1.95032	0.174123	0.263544	10.558	10.3142
AP4B1	0		0	-4.13466	0.508927	0.674348	6.99254	7.60292		0	-2.20404	0.133666	0.169192	3.09449	3.35558		0	-3.87755	0.224376	0.203832	8.2437	8.776
AP4E1	0		0	2.04985	0.565358	0.330483	7.57296	7.1991		0	1.31314	0.164085	0.123291	3.60569	3.47984		0	3.82369	0.27579	0.344348	9.0974	8.46035
AP4M1	0		0	-1.20084	0.242609	0.312789	4.43246	4.46891		0	-1.22309	0.0744303	0.149174	3.52364	3.57037		0	-0.709364	0.234457	0.212005	8.6465	8.64285
AP4S1	0		0	2.12608	0.89596	0.874359	5.14621	4.72623		0	2.73478	0.0769663	0.17551	3.34108	2.85637		0	0.633257	0.336954	0.497662	6.8322	6.57945
APAF1	0		0	-2.81667	0.772827	0.584973	7.07212	7.37425		0	-1.43916	0.0763209	0.106455	3.32911	3.38952		0	-1.23213	0.226427	0.815684	8.7573	9.10995
APBA1	0		0	-2.93826	1.21326	2.11552	2.81661	3.67853		0	-2.62733	0.190828	0.701996	1.81244	2.84564		0	1.74262	0.777175	2.35467	7.9027	7.20345
APBA2	0		0	0.308769	1.43048	1.24247	3.86093	3.77999		0	0.332108	1.79443	1.34874	0.583401	0.553292		0	0.0303945	5.34674	5.27691	4.2594	4.4401
APBA3	0		0	0.349944	0.462599	0.11114	7.8665	7.82737		0	0.260777	0.171053	0.376234	3.35699	3.03214		0	1.93063	0.271397	0.38548	8.9487	8.44765
APBB1	0		0	3.34196	0.296323	0.238443	3.69806	3.40239		1.6391	7.03629	0.260306	0.177941	4.72547	3.45119		2.19317	6.48385	0.245857	0.5429	10.8896	9.71955
APBB1IP	0		0	-3.17724	3.47003	4.71142	7.47557	8.91897		0.174024	-5.37883	0.50465	0.87151	1.77007	3.42527		0	-3.47056	1.83426	2.33961	6.6376	8.05185
APBB2	0		0	-2.5055	0.91847	1.198	8.53233	8.85492		0	-3.60852	0.240996	0.384007	4.03154	4.7756		0	-0.0295286	0.344641	1.04547	10.4224	10.2382
APBB3	0		0	2.37121	1.14523	0.645589	4.62389	4.41181		0	1.05273	0.270887	0.254609	4.19285	3.82503		0	3.67554	0.392739	0.797161	9.0538	8.1346
APC	0		0	0.0710519	0.269666	0.340942	8.66494	8.57724		0	-3.28565	0.16741	0.0405502	3.73372	3.99054		0	0.894178	0.325347	0.635456	9.7224	9.5213
APC2	0		0	-0.8587	0.146572	0.186948	4.17839	4.17673		0	-1.2985	0.0296912	0.128138	0.810821	0.922614		0	-3.10912	0.924359	4.18258	3.4748	5.2506
APCDD1	0		0.937705	-4.75647	4.23638	3.23453	7.21299	8.50187		0	-0.527778	1.95085	1.63925	2.91003	2.75141		0	-1.2337	4.56495	1.45384	8.6614	9.2065
APCDD1L	1		4.17087	-6.71664	0.34603	3.67253	4.32571	5.86895		0	-3.74075	0.51024	1.79113	0.931282	2.42418		0	-3.18157	7.3588	15.7109	3.7692	9.4238
APCS	0		0	-1.42081	8.72791e-05	0.000197159	2.13219	2.13384		0	0.0678557	0.000804568	0.000754397	0	0		0	0.360431	1.83141	0.954391	0	0
APEH	0		0	0.677934	0.373257	0.536086	7.32075	7.16402		0	1.19371	0.0734127	0.361471	4.5805	4.0695		0	0.244506	0.0934584	0.501579	10.5947	10.5912
APEX1	0		0	-0.696595	0.231383	0.50217	11.1027	11.265		0	0.506932	0.0810876	0.48775	5.65428	5.86052		0	-2.62374	0.165728	0.202409	11.3807	11.6183
APEX2	0		0	-1.21685	0.549864	0.859869	5.96244	6.24389		0	-2.53638	0.40953	0.224179	3.3477	3.90096		0	-2.02888	0.342941	0.482168	9.1615	9.5964
APH1A	1		15.009	-12.0499	0.411019	0.334225	6.62814	8.01726		4.0183	-10.1894	0.0351316	0.0754619	5.36919	6.21914		6.10537	-9.98657	0.104866	0.180628	10.974	11.9446
APH1B	0		0	-0.712905	0.799861	1.02764	5.09296	5.15702		0	0.802121	0.088978	0.0946577	3.49041	3.29273		0	0.41678	0.19731	0.483469	8.4627	8.27345
API5	0		0	1.17977	0.369732	0.514713	9.85027	9.58611		0	2.0264	0.0555599	0.164159	5.45383	5.25764		0.864663	5.38453	0.153625	0.161364	11.2146	10.6501
APIP	0		0	0.509867	0.599361	0.415607	7.5624	7.44943		0	2.56517	0.119082	0.22534	4.3743	3.94408		0	0.784507	0.236535	0.283451	8.2918	8.2616
APLF	0		0	-1.12571	0.000789082	0.00123335	2.76121	2.76922		0	-0.207778	0.252759	0.112499	2.44631	2.43199		0	-0.396802	0.304073	0.439006	5.8987	6.1074
APLN	0		0	1.14134	1.07914	1.22743	6.24048	5.84121		0	-0.703613	1.87234	3.02911	3.22541	3.14351		0	1.49791	1.96299	2.30504	9.2594	9.1663
APLNR	0		0	-2.23769	3.16573	4.62693	3.82813	5.05401		0	-2.89512	0.751956	0.785993	1.55078	2.54391		0	-0.998647	3.4604	3.62508	8.4983	8.58335
APLP1	0		0	3.87682	2.89656	1.9512	4.20211	2.3124		0	2.11779	1.48162	1.41554	2.78572	1.79785		0	2.46573	2.36773	3.41799	9.1218	7.2701
APLP2	0		0	-1.25156	0.570881	0.745645	10.5534	10.649		0	-0.672072	0.218425	0.44846	6.68875	6.82748		0	4.03316	0.325898	0.324947	13.6928	13.1173
APOA1	0		0	0.773477	0.0171758	8.74979e-05	2.34147	2.34795		0	1.56173	0.0734823	0.0157753	0.188661	0.152131		0	-2.60959	2.36571	2.97173	1.5835	2.91245
APOA2	0		0	-0.963752	0.00011497	0.000153046	2.42507	2.42797		0	-2.44827	0.0398391	0.0336129	0.125626	0.366843		0	-0.568689	3.44577	4.59142	0	0
APOA4	0		0	-1.09239	0.140427	0.166109	4.20814	4.26414		0	0.0983007	0.000244358	0.000211479	0	0		0	0.281135	1.46475	0.292491	0	0
APOA5	0		0	-2.56079	0.0803849	0.183068	3.81235	3.89083		0	-1.19339	0.00128826	0.00423925	0	0.0338877		0	-0.507239	0.671698	0.691545	0	0
APOB	0		0	-0.986327	0.000133767	0.00727533	2.30357	2.30451		0	-0.228357	0.12	0.296748	0.123425	0.123824		0	3.67185	6.99637	3.57117	4.141	1.45155
APOBEC1	0		0	-1.47294	5.01403e-05	6.30788e-05	2.15398	2.15753		0	-1	0	0.00051766	0	0		NA	NA	0	0	0	0
APOBEC2	0		0	-1.47385	1.35115	4.10559	2.69041	2.70001		0	0.545144	0.170436	0.20176	1.27114	1.18686		0	-1.20538	2.74701	12.5575	1.2995	1.29185
APOBEC3A	0		0	-0.35538	0.16435	0.247322	2.63886	2.64197		0	-1.57408	0.0569209	0.0821963	1.6805	1.86379		0	0.590872	2.01826	3.30938	3.423	3.19715
APOBEC3B	0		0	1.11913	2.7364	3.82673	6.71805	6.90924		0	-0.976329	0.659486	1.08016	2.09966	2.48243		0	-0.334111	2.6067	2.728	7.3073	7.49125
APOBEC3C	0		0	2.17975	0.375962	0.227512	8.01281	7.72049		0	1.29305	0.100753	0.311498	4.13218	4.06756		0	1.59071	0.415556	1.64978	8.8723	8.3005
APOBEC3D	0		0.383218	-4.38236	0.000642335	0.000792064	2.72685	2.74958		0	0.745261	0.138265	0.339127	2.6672	2.51933		0	2.88163	0.713381	3.34523	7.448	6.374
APOBEC3F	0		0	3.66698	2.45864	1.0564	5.25037	3.67533		0	2.44972	0.120271	0.434243	2.92988	2.48764		0	3.09625	0.488833	1.6371	8.485	7.7145
APOBEC3G	0		0.937993	4.73754	2.35773	2.19248	8.83288	6.97852		0	1.67053	0.26791	1.16851	3.51928	3.16735		0	1.8085	0.766852	2.82861	9.2552	8.29395
APOBEC4	0		0	1.01135	6.12977e-05	5.16562e-05	2.19058	2.19032		0	2.99428	0.474716	0.356721	1.66391	0.784818		0	2.73632	0.207039	0.0806948	0	0
APOC1	0		0	-3.33598	1.84027	1.44562	8.06696	8.86895		0	-4.24914	2.70549	3.43277	3.24289	5.15289		0.998273	-5.49487	3.25722	4.23683	6.9602	9.5163
APOC2	0		0	-0.878737	0.121376	0.205922	4.92585	4.95076		0	-3.83687	0.267435	1.31491	0.515556	2.36923		1.10209	-5.58046	3.14273	5.41649	2.1603	5.9358
APOC3	0		0	-0.61425	0.0358673	0.146521	2.43148	2.43604		0	0.715003	0.00338913	0.000716244	0	0		0	-0.546754	2.36299	2.84403	0	0
APOD	0		0	-0.875211	3.99148	8.21784	4.54981	4.54615		0	-0.516679	1.24096	1.50618	1.95498	2.20127		0	0.0577132	2.65432	9.53418	8.2586	7.21055
APOE	0		0	-1.54839	1.9109	1.34155	8.70625	9.33479		0	-3.58953	3.2257	3.02398	5.53244	7.2901		0	-3.87718	3.50361	3.37558	10.6093	12.4889
APOF	0		0	-0.440753	0.000373041	0.000439404	2.47553	2.47964		0	-2.36591	0.00867598	0.0174729	0.217548	0.312828		0	0.511805	0.214338	0.0854692	0	0
APOH	0		0	-0.754892	0.000232668	0.00127688	2.3786	2.37769		0	-0.900847	0.000456945	0.00254405	0	0		0	-0.725499	2.33281	3.54191	0	0
APOL1	0		0	0.693772	1.89291	1.99941	8.44783	8.19345		0	-1.07528	0.787262	0.939004	4.2919	4.15402		0	0.800846	1.27494	4.36312	11.6936	11.14
APOL2	0		0	0.25883	0.456016	0.392854	7.79328	7.7004		0	-0.206542	0.146285	0.222601	4.61564	4.53324		0	0.816607	0.418498	1.23472	10.6803	10.3506
APOL3	0		0	1.65103	2.05716	2.62531	7.99087	7.30366		0	0.453776	0.653709	1.97161	4.17055	3.19502		0	2.28491	1.24948	3.43372	10.3907	9.40365
APOL4	0		0	-2.17267	0.35029	0.623243	4.02407	4.15609		0	-0.969184	0.194259	0.32945	2.99177	3.2821		1.77904	-6.13935	3.06497	2.27818	6.1624	8.4734
APOL5	0		0	-1.20008	7.91563e-05	0.00594059	2.40943	2.41337		0	-2.18944	0.00647628	0.0112629	0.0544707	0.132342		0	-1.29731	1.10979	1.22895	0.4801	0.7847
APOL6	0		0	1.88174	2.24559	2.11956	7.31594	6.84992		0	-0.155036	0.841168	0.80449	4.36221	4.50012		0	1.33357	0.621836	2.7256	10.5769	10.1312
APOLD1	1		2.94875	5.82673	1.07542	1.56708	9.50058	8.30738		0	0.884617	0.778746	1.18037	4.45538	4.39155		0	4.53977	0.875772	1.82898	10.4777	8.66955
APOM	0		0	1.05303	0.0329144	0.0378431	2.54401	2.54204		0	-0.954766	0.0917021	0.188012	1.60995	1.6874		0	1.8567	0.516378	0.825846	5.0768	4.9183
APOO	0		0	0.771041	1.05207	0.927802	8.31587	8.29925		0	-0.349244	0.628746	0.43417	3.52186	3.72554		0	-2.05978	0.601126	0.626133	7.7732	8.35285
APOOL	1		3.22945	5.99163	0.722362	0.848548	8.85591	7.88675		0	4.38321	0.174439	0.126452	3.39055	2.84317		0	3.4816	0.879163	0.55701	7.6961	6.76265
APP	0		1.86666	-5.29133	0.929608	0.771819	10.0415	10.9762		0.976298	-6.2669	0.345147	0.190749	6.51321	7.38826		0	-4.61533	0.73975	0.412268	13.4716	14.4275
APPBP2	0		0	-2.89215	0.503669	0.311561	8.36972	8.64726		0	-0.0572041	0.172873	0.0998011	4.40632	4.36666		0	0.371373	0.139709	0.519253	9.8284	9.82695
APPL1	0		0	0.343212	0.424493	0.42479	7.43924	7.30039		0	2.29799	0.0899138	0.100155	4.93366	4.72679		0	1.11535	0.194494	0.297741	10.3661	10.2995
APPL2	1		3.58638	-6.39661	1.85134	0.827412	5.73326	7.53555		0	-5.13296	0.130508	0.0947603	4.06909	4.70562		0	-3.1593	0.175231	0.490869	9.2597	9.84745
APRT	0		0.943036	-4.72242	0.371427	0.447536	8.0197	8.4791		0	-1.68465	0.20585	0.489774	5.13387	5.35708		0	-4.19385	0.424045	0.708691	9.5243	10.2233
APTX	0		0	2.16575	0.65223	0.482449	7.48787	6.95362		0	1.2214	0.124107	0.199602	3.86926	3.57932		0	1.31094	0.215816	0.216258	8.9722	8.73965
AQP1	0		0	0.855109	2.21432	3.63316	9.04804	8.51409		0	1.24745	1.60482	0.603828	5.93372	5.64891		0	4.08423	1.4827	2.51906	12.7946	11.2017
AQP10	0		0	-0.58185	9.09746e-05	0.000321873	2.14791	2.14906		0	1.51516	0.00353009	0.00353047	0.0762296	0.0216234		0.152098	4.7951	0.544798	0.137255	0.8972	0
AQP11	0		0	0.589399	0.0418091	0.0129544	1.87756	1.87696		0	-0.844609	0.21056	0.222373	1.79632	1.78709		0	-2.62041	0.487011	2.08896	3.8104	4.6839
AQP12A	0		0	-1.01713	0.0195936	0.0767127	3.56997	3.61684		0	-0.617644	0.00011258	0.000368677	0	0		0	-1.28422	0.00492143	0.0799943	0	0
AQP2	0		0	-0.336666	0.154064	0.0840631	3.12772	3.17573		0	-1.61352	0.000330881	0.00303672	0	0.0184144		0	0.327361	0.838404	0.0781003	0	0
AQP3	1		2.00343	-5.38019	0.538448	2.55295	3.73681	4.56444		0	-1.77453	0.277327	1.29011	0.851834	1.35151		0	-3.40599	1.75913	2.32458	5.462	6.4341
AQP4	0		0	0.602152	1.9025	1.50653	2.56038	2.56578		0	2.48022	1.83067	0.033299	0.117381	0.0141205		0	1.57327	11.6896	6.34842	1.0705	0.6828
AQP5	0		0	-2.88807	0.00600802	0.0205743	2.56553	2.59181		0	-1.28613	0.0420486	0.219638	0.092325	0.0710344		0	-1.92148	1.89709	3.12664	0.9042	2.0463
AQP6	0		0	-1.25969	0.0184494	0.0775336	2.86711	2.88416		0	-1.01642	0.0288153	0.0435323	1.0202	1.1424		0	0.132541	2.95185	1.07733	1.7285	1.6787
AQP7	0		0	-2.17589	0.0834171	0.726944	3.4725	3.52133		0	-1.07712	0.264457	0.963061	0.889241	1.26955		0	2.42862	2.10996	4.81193	3.4522	1.26355
AQP8	0		0	-0.365534	3.56983e-05	5.74956e-05	2.08796	2.09154		0	0.170367	0.0166625	0.044977	0.137748	0.108439		0	2.03392	0.604671	0.677512	1.3234	0.9999
AQP9	0		0	-2.64551	0.0723335	1.3841	2.03045	2.03073		0	-1.56526	0.445486	2.8544	0.3004	0.751279		0	-2.05502	4.14337	6.17802	2.9243	4.44985
AQR	0		0	3.75233	0.332196	0.361434	8.13784	7.85853		0	1.86109	0.0672024	0.0980614	4.41621	4.2285		0	3.00233	0.224258	0.562853	9.7774	9.22725
AR	0		0.667823	4.56667	5.00304	5.15746	7.94097	5.81406		0	4.78136	1.74825	1.46014	3.66589	1.91745		1.80967	6.16467	2.43708	5.15743	7.1894	2.69955
ARAF	0		0	0.940285	0.628312	0.378966	7.28806	7.33889		0	-1.5235	0.23231	0.170024	4.64729	4.99343		0	-2.21441	0.18895	0.212556	10.5875	10.953
ARAP1	1		4.03512	-6.39985	0.286463	0.363313	6.28628	7.1058		0	-4.56385	0.0930727	0.202763	4.10063	4.70587		0	-4.07867	0.239044	0.194893	11.0771	11.5966
ARAP2	0		0	-1.30937	1.19969	1.46863	4.04915	4.36446		0	-1.44916	0.545267	1.08053	1.71118	2.62732		0	-1.24718	3.12886	3.36547	5.6971	6.38755
ARAP3	0		0	1.83661	2.00377	2.18598	6.52147	6.02849		0	0.556786	0.170682	0.308105	2.76562	2.82903		0	1.35578	0.435042	1.68694	9.3689	8.56375
ARC	0		0	-2.39127	0.251729	4.32006	2.3111	2.32486		0	-1.53376	0.0487211	1.13711	0.188094	0.406579		0	-3.42964	1.3441	2.94616	3.5722	5.03445
ARCN1	0		0	-3.14254	0.464238	0.246043	10.4031	10.8412		0	-3.36764	0.156395	0.179499	5.42081	5.92494		0	-1.64471	0.178323	0.286865	11.8029	11.858
AREG	0		0	-0.0665259	0.959225	1.52661	2.70789	2.71075		0	-0.449811	0.6867	1.0557	0.434499	0.941466		0	0.811424	3.09104	4.08218	3.9289	2.95855
ARF1	0		0	-1.20274	0.211019	0.200947	11.4798	11.5163		0	-0.159978	0.0485761	0.0665401	7.03644	7.05338		0	-2.79484	0.163487	0.115097	13.0153	13.278
ARF3	1		2.50533	-5.59968	0.356963	0.449552	8.88012	9.66064		0	-3.36515	0.131666	0.0982979	4.92572	5.13918		0	-3.34471	0.164184	0.0860704	11.4489	11.6818
ARF4	0		0	-2.72365	0.350685	0.440561	12.6041	12.9504		0	-3.51509	0.263941	0.110525	6.86188	7.33202		0	-1.84409	0.457796	0.809918	12.1846	12.8261
ARF5	0		0	-1.72261	0.386261	0.316903	7.43671	7.77098		0	-1.90589	0.110519	0.184313	5.88994	6.2058		0	-3.58721	0.213931	0.268089	11.2884	11.778
ARF6	0		0	-3.20854	0.261742	0.363315	11.0838	11.4419		0	-1.14374	0.140841	0.173232	5.10638	5.2086		0	-1.59433	0.263711	0.366677	11.414	11.535
ARFGAP1	1		4.24786	-6.56077	0.219234	0.821009	7.01353	7.8383		0	-3.87536	0.0742777	0.574984	4.33813	4.88782		0	-4.26332	0.132977	0.714415	10.5891	11.5033
ARFGAP2	0		0	-2.67665	0.537771	0.350963	7.40407	7.702		0	1.75488	0.120809	0.220766	4.86099	4.60054		0	-0.222903	0.222454	0.267754	10.8546	10.6721
ARFGAP3	0		0	-2.39928	0.35826	0.497224	9.76388	10.177		0	-2.56118	0.319409	0.168708	5.01603	5.50406		0	-1.76048	0.139734	0.393976	10.5527	10.9249
ARFGEF1	0		0	-0.952551	0.31423	0.293049	8.57386	8.61276		0	-1.6352	0.073464	0.172533	4.47637	4.72977		0	-0.720669	0.187643	0.5112	10.0625	10.1045
ARFGEF2	0		0	-0.485405	0.234634	0.260086	9.06941	9.21648		0	-1.75074	0.0728653	0.184635	4.22516	4.48489		0	2.12581	0.232103	0.600798	10.2257	9.843
ARFIP1	0		0	-2.68843	0.622097	0.318981	8.88715	9.16847		0	-0.92773	0.119445	0.188082	4.21975	4.30291		0	-0.0588874	0.211537	0.368739	9.5166	9.46745
ARFIP2	0		0	-2.71622	0.814073	1.04953	7.01788	7.53596		0	-0.52461	0.0873209	0.150453	3.3176	3.27907		0	-0.790355	0.23428	0.332605	9.756	9.7827
ARFRP1	0		0	-2.33282	0.223317	0.222894	6.65496	6.83116		0	-2.79542	0.189235	0.156872	3.72968	4.07023		0	-2.95755	0.371229	0.497757	9.6218	10.0531
ARG1	0		0	-1.47677	0.000376691	0.000517315	2.59585	2.6003		0	-0.534328	0.105575	0.072686	0.638672	0.604218		0	-1.33069	0.60397	1.38251	0.4462	0.76715
ARG2	0		0	3.41953	7.2606	3.2901	5.72551	3.59127		0	2.61939	0.811589	0.179079	3.50822	3.31322		0	1.01178	2.46299	1.8846	8.0391	7.18935
ARGLU1	0		0	-0.0427656	0.641974	0.440558	11.4756	11.4425		0	-0.0273469	0.187351	0.204641	5.77041	5.73202		0	2.22882	0.415262	0.600989	10.7033	10.3535
ARHGAP1	0		0	2.26713	0.377616	0.81048	11.5723	11.4034		0	1.22865	0.1863	0.464381	5.85378	5.46358		2.82402	7.01478	0.167952	0.486107	13.016	11.6033
ARHGAP10	0		0	2.35646	0.392272	0.250408	7.20657	7.08355		0	3.02872	0.333657	0.246327	4.91078	4.22521		4.45104	8.43496	0.349588	0.257011	10.6262	9.4857
ARHGAP11A	0		0	2.91634	1.07983	0.299688	3.16611	3.00455		0	0.91955	0.802196	0.41073	4.36816	4.13409		0	1.28307	1.14791	0.67027	9.6553	9.26485
ARHGAP15	0		0	1.76709	4.72979	2.92259	5.55132	4.64757		0	0.221166	1.3682	0.701382	3.07862	3.13726		0	0.054307	2.53003	2.32385	6.2606	6.5052
ARHGAP17	0		0	-2.00456	0.649568	0.370384	7.70521	8.10198		0	-3.89157	0.161083	0.122089	3.21603	3.73394		0	-1.02946	0.15861	0.73029	10.0754	10.5122
ARHGAP18	0		0.988565	-4.73929	1.37268	2.25796	7.99445	9.47838		0.937893	-6.22347	0.365306	0.294485	3.39302	4.67518		1.35162	-5.78605	0.760944	0.720237	8.273	9.53055
ARHGAP19	0		0	-3.5196	0.732121	0.452519	4.82447	5.43742		0	-1.65546	0.118627	0.295708	2.14641	2.40537		0	-4.11112	0.437292	0.81455	7.7053	8.6284
ARHGAP20	1		3.35087	6.05927	3.74924	4.25822	7.59561	4.13095		0	3.22382	1.03967	1.23448	3.60253	2.32918		2.99556	7.16062	2.80872	2.17522	8.8749	5.8698
ARHGAP21	0		0	-1.1972	1.04929	0.614746	9.66515	9.90539		0	0.714738	0.362994	0.230928	5.08866	4.92728		0	3.53271	0.740363	0.288919	10.9083	10.3846
ARHGAP22	0		0	-3.79748	0.692308	3.72183	2.38539	3.03933		0	-3.7585	0.301351	0.901211	2.02133	2.99874		0	-2.74365	1.04105	2.7614	7.272	8.3347
ARHGAP23	0		0	-1.67143	0.787802	0.491594	6.92914	7.23742		0	0.246586	0.151112	0.286426	3.64773	3.52579		0	2.18378	0.170669	0.729364	10.8431	10.1433
ARHGAP24	0		0	-4.10023	1.7772	2.40234	6.96602	8.27292		0	-4.53315	0.467545	0.430081	2.58181	3.64088		0	-2.74302	1.02855	1.00606	8.1314	8.6609
ARHGAP25	0		0	1.23985	2.40961	1.76246	5.22287	4.82754		0	-0.318277	0.417485	0.487793	2.67824	2.91698		0	-1.28004	1.38999	1.51029	7.9275	8.3173
ARHGAP26	0		0	-2.78078	0.618009	0.909721	4.81803	5.36931		0	-2.65986	0.254251	0.392371	2.16228	2.46727		0	-1.39491	0.700983	1.11582	8.0501	8.21475
ARHGAP27	0		0.608768	-4.51621	0.260019	0.360186	6.13872	6.62432		0	-5.08987	0.329493	0.197927	2.60918	3.30298		0	-1.92147	0.835177	1.05521	7.8846	7.82405
ARHGAP28	0		0	-3.9191	4.50658	5.45681	5.58711	8.42508		0	-2.18451	1.20345	1.01183	3.31574	4.16483		0	-1.09824	1.05441	3.32699	8.6403	9.44255
ARHGAP29	0		0	0.653748	1.68989	2.35029	9.58715	9.57291		0	0.366163	0.49256	0.416945	3.88581	3.64105		0	2.73793	0.909652	1.8609	10.1988	9.2497
ARHGAP30	0		0	-1.61533	0.940708	0.963176	7.18989	7.3756		0	-2.76443	0.343153	0.486876	2.49217	3.25233		0	-3.10073	1.90943	1.76171	8.2371	9.0669
ARHGAP31	1		6.21914	-7.46943	0.78135	1.10406	5.05438	6.80347		1.11478	-6.42459	0.103774	0.236491	2.82985	3.99584		0	-3.61315	0.538068	0.677979	8.9879	9.61825
ARHGAP32	0		0.0235779	-4.26433	0.0499532	1.45665	2.64022	2.6554		0	-3.34642	0.484938	0.651447	2.02471	2.75132		0	-4.07029	1.70447	0.943219	7.3584	8.4515
ARHGAP33	0		0	2.38806	2.136	1.09363	5.13697	4.80527		0	1.94695	0.242147	0.0964917	2.71713	2.54047		0	4.41181	0.662901	0.582047	9.5111	8.6529
ARHGAP36	0		0	-0.197887	0.380661	0.263536	2.33081	2.33497		0	-1.23516	0.00520679	0.012813	0	0.0165616		0	-1.80735	1.6451	5.47592	0.668	1.39215
ARHGAP39	0		0	-2.76387	0.0258754	0.378183	3.01641	3.10463		0.752239	-6.01488	0.19133	0.0973614	0.841706	1.74762		0.0970918	-4.74902	0.778908	1.15609	6.3725	7.9092
ARHGAP4	0		0	-2.84073	0.440188	0.49168	5.90301	6.25318		0	-2.4262	0.324675	0.482457	3.12757	3.58787		0	-2.13786	1.2312	1.93866	8.8347	9.39035
ARHGAP42	0		0	3.36621	2.28663	2.30393	6.8338	5.8396		0	1.29034	0.608557	1.11317	4.1008	3.836		0	3.90406	0.942067	1.61744	8.5282	7.16735
ARHGAP5	0		0.835098	4.64863	0.397086	0.640627	9.22496	8.4168		0	3.31916	0.0736973	0.337396	5.5834	4.88954		0	2.57276	0.410502	0.943666	11.0777	10.3424
ARHGAP6	0		0.0115027	4.14569	2.80725	3.71978	8.44034	6.72719		0	4.19081	0.531079	0.728645	3.5391	1.95455		0	3.51173	0.831369	3.11771	9.2808	7.1026
ARHGAP8	0		0	-1.56301	0.000387163	0.31718	2.41782	2.42289		0	-2.40068	0.0399326	0.276197	0.247752	0.587296		0	-2.18498	1.45464	3.13636	1.0705	1.97255
ARHGAP9	0		0	-3.50124	1.46895	1.43626	5.12588	6.34955		0	-2.74146	0.356903	0.572215	1.96389	2.50901		0	-3.84314	2.12643	2.08208	6.4541	7.98635
ARHGDIA	1		2.32361	-5.55737	0.627073	0.492176	7.98801	8.88382		0	-3.36846	0.270228	0.1121	5.54288	6.01932		2.43547	-6.68669	0.200672	0.242856	12.3766	13.056
ARHGDIB	0		0	3.76504	0.834395	1.54261	11.1884	10.4421		0	1.11508	0.259398	0.633352	5.94474	5.68815		0	-0.16319	0.809256	0.796966	11.3982	11.5033
ARHGDIG	0		0	-1.73897	0.286305	1.25892	2.38128	2.38131		0	1.60026	0.0892522	0.0648136	0.287478	0.095238		0	-1.2657	0.636004	3.81084	0.9913	0.87315
ARHGEF1	0		0	-1.85723	0.171229	0.267067	7.68568	7.82275		0.747043	-6.00908	0.126228	0.0685265	3.74102	4.39845		0.0347234	-4.6971	0.18758	0.236325	10.7508	11.4235
ARHGEF10	0		0	-0.463526	2.34003	1.98013	8.88566	8.68913		0	-0.449601	0.276914	0.318786	4.00419	3.9774		3.62244	7.70102	0.314523	0.314704	10.4571	9.44155
ARHGEF10L	1		5.96059	7.33198	0.743098	1.26526	8.32643	6.73965		0.192494	5.39884	0.400498	0.420645	4.72645	3.44544		1.74019	6.10715	0.448517	1.1628	11.1132	9.54155
ARHGEF11	1		2.15963	-5.4009	0.142906	0.22605	5.81812	6.29674		0	-3.52733	0.0479211	0.196569	3.91604	4.36915		0	0.477817	0.233542	0.291933	10.4484	10.2689
ARHGEF12	0		0	0.114629	0.471436	0.360051	10.4524	10.2959		0	1.49784	0.086284	0.230099	5.51637	5.26607		0	2.41387	0.318345	0.966978	11.782	11.3279
ARHGEF15	0		0	-3.3038	0.00772769	0.248221	3.1481	3.18798		0	-3.70348	0.262329	0.233646	1.11287	1.67048		0	-0.125601	0.937703	1.97695	8.1848	7.8317
ARHGEF16	0		0	1.29986	0.0788461	0.0229835	2.7586	2.76468		0	0.710307	0.338333	0.0795221	0.223966	0.36754		0	2.8519	4.44452	1.60972	4.5646	3.0868
ARHGEF17	0		0	3.74576	0.808648	0.956567	7.44155	6.7702		0	3.38506	0.193964	0.508655	4.62561	3.95316		1.80765	6.16297	0.277154	0.601102	12.0939	10.5816
ARHGEF18	0		0	-1.66691	0.441983	0.263449	8.35219	8.55989		0	-1.81829	0.095021	0.245391	3.40174	3.7517		0	0.000858348	0.142693	0.171219	10.1497	10.1098
ARHGEF19	1		2.74316	-5.78034	0.532433	2.27642	3.18048	4.61757		0	-5.10349	0.290505	0.997491	1.15428	3.02625		0	-4.19237	1.50249	2.19042	7.1735	8.77465
ARHGEF2	0		0	-2.13684	0.184984	0.408769	9.54512	9.89229		0	0.68955	0.0996997	0.502316	5.40638	5.16609		0	2.05364	0.115927	0.279412	11.7769	11.4801
ARHGEF3	0		0	0.419578	1.70689	1.842	8.52438	8.30888		0	-0.100947	0.355348	0.665335	3.56355	3.29222		0	1.4296	0.48642	1.4221	9.2572	8.86395
ARHGEF33	0		0	-0.71272	0.000218266	0.000248177	2.35842	2.36376		0	-1.06415	0.108548	0.116963	0.557273	0.809139		0	-1.59444	1.19468	1.93092	3.0132	3.80585
ARHGEF37	1		4.24076	6.68831	2.88002	1.63414	7.10271	4.09064		1.28942	6.62581	0.317358	0.783894	3.28242	1.33076		3.47787	7.57535	0.917035	3.28458	9.3576	5.3144
ARHGEF38	0		0	-1.08453	7.78603e-05	0.0104466	2.09728	2.09839		0	0.988639	0.00447184	0.0024167	0.0495671	0.0446933		0	1.4255	0.00806185	0	0	0
ARHGEF4	0		0	0.535298	1.62562	2.25747	2.51891	2.42		0	2.26892	0.771477	0.851373	1.72115	0.607891		0	3.24158	4.26469	7.23931	7.8026	5.41575
ARHGEF5	0		0	1.50568	0.647775	0.134968	4.86616	4.82789		0	1.7872	0.517556	1.20675	2.52717	1.88077		0	3.58969	2.70858	3.23273	7.2857	5.2896
ARHGEF6	0		0	-1.91313	1.64779	2.52301	9.02183	9.90531		0	-2.08592	0.168264	0.315089	4.18359	4.59844		0	0.168648	0.235407	1.04387	10.0686	10.1238
ARHGEF7	0		0	-1.56524	0.78717	0.842874	8.95656	9.14098		0	-1.97756	0.267669	0.166778	4.11715	4.4029		0	1.07257	0.371217	0.396022	10.0833	9.83595
ARHGEF9	1		5.44594	7.1979	1.46423	1.23503	7.6664	5.5885		1.63409	7.03031	0.218853	0.127851	4.03953	3.10466		3.04863	7.20589	0.52845	0.731788	10.3212	8.731
ARID1A	0		0	-0.358198	0.265766	0.444374	9.57336	9.64341		0	-2.84954	0.108828	0.0506575	3.69926	3.9778		0	1.69112	0.269253	0.343483	11.3206	10.8725
ARID1B	0		0	0.305758	0.843034	0.689598	8.53377	8.305		0	-1.10702	0.103636	0.228929	3.93571	3.85627		0	0.683052	0.153518	0.505647	10.8446	10.6756
ARID2	0		0	-2.34809	0.416072	0.429964	7.36817	7.5894		0	0.0238327	0.0759826	0.0377836	3.97973	3.92888		0	1.88874	0.223401	0.44091	9.19	8.88905
ARID3A	0		0.676126	-4.5546	0.298064	0.454524	3.92252	4.16746		0	-3.72564	0.130965	0.211729	1.35152	1.82737		1.23993	-5.69414	0.595213	0.566824	5.6519	7.0324
ARID3B	0		0	0.0713179	0.659084	0.567875	4.861	4.82228		0	0.326702	0.138164	0.612744	2.02367	1.63977		0	2.10508	0.443046	0.716972	6.7591	6.31645
ARID4A	0		1.17835	4.87194	0.3428	0.352013	7.47381	6.85715		0	4.84958	0.0729078	0.11071	3.64541	3.00711		0	3.53656	0.267966	0.97706	9.4603	8.63765
ARID4B	0		0	2.09832	0.226342	0.45646	9.83514	9.51951		0	3.16384	0.10355	0.0771872	4.25566	3.90479		0	1.97437	0.206328	0.540522	9.7767	9.53745
ARID5A	0		0.382068	4.41976	0.593659	0.420222	7.10222	6.51892		0	2.35266	0.616708	0.244254	4.14065	3.73966		0	2.99215	1.07204	0.889071	10.4351	9.79325
ARID5B	1		3.03382	5.88445	0.501062	1.34123	10.4825	9.38677		0	3.25526	0.25281	0.478975	4.87767	3.9376		0.465767	5.05539	0.384631	0.729137	11.1478	10.0273
ARIH1	0		0	2.2603	0.283641	0.378243	9.01539	8.78885		0	2.04897	0.0651311	0.0607746	5.04168	4.73817		0	3.73413	0.0828346	0.294589	10.7433	10.3403
ARIH2	0		0	2.35537	0.286578	0.426873	8.33909	8.0137		0	2.12641	0.117188	0.28381	4.83964	4.36256		0	2.93614	0.0896098	0.143229	10.9341	10.7404
ARL1	0		0	-2.25547	0.467776	0.348822	9.17871	9.49494		0	0.650366	0.141659	0.0443576	5.14537	5.06659		0	-0.92953	0.232641	0.275423	10.8099	10.9035
ARL10	0		0	-0.147867	0.841025	1.2465	7.68967	7.66703		0	-1.62868	0.17204	0.286325	2.90111	3.43116		0	1.08578	0.51227	0.693582	6.4385	6.2471
ARL11	0		0	-3.82907	0.125155	0.469058	3.16951	3.40856		0	-3.78549	0.0294753	0.109786	0.79444	1.21782		0	-4.56327	1.41129	1.39136	4.6274	5.89515
ARL13B	0		0	2.87309	0.536384	1.35287	7.84098	7.51702		0	1.139	0.145481	0.167755	3.45619	3.25349		0	3.58502	0.252244	0.616623	8.4068	7.8998
ARL14	0		0	-1.15573	0.000986022	0.0012566	2.63173	2.64369		0	1.21458	0.273135	0.00384671	0.0644946	0		0	-0.772414	0.666135	2.02449	0	0
ARL15	0		0	1.00922	1.08626	1.16223	9.05925	9.13668		0	-2.42051	0.198274	0.1429	3.71883	3.98088		0	1.31773	0.51642	1.67491	8.2089	8.06795
ARL16	0		0	-2.53431	0.279419	0.347626	6.97319	7.10389		0	1.34749	0.233029	0.282304	4.158	4.02119		0	-1.90128	0.325182	0.487657	9.0096	8.9494
ARL17A	0		0	0.861348	0.416531	0.73505	7.42383	7.39404		0	1.73864	0.213922	0.310913	5.1377	4.60601		0	3.01421	0.295681	0.302337	6.6987	6.15955
ARL2	0		0	-0.895404	0.510777	0.648859	7.53918	7.84603		0	-0.388443	0.176447	0.316526	5.32765	5.25769		0	-3.13138	0.169929	0.743133	10.4635	10.9372
ARL2BP	0		0	-2.89629	0.677113	0.626307	7.84289	8.42009		0	-2.82409	0.244314	0.267881	4.64138	5.12989		0	-3.58207	0.272253	0.322111	10.1639	10.8232
ARL3	0		0	-3.10697	0.408331	0.303627	9.37343	9.82979		0	-2.45537	0.139705	0.0641001	2.47872	2.71398		0	-2.32493	0.245729	0.76392	9.0209	9.55025
ARL4A	0		0	2.90823	1.29587	2.30148	8.64762	7.97549		0	0.61498	0.398074	0.32994	3.6095	3.67321		0	-1.45427	0.743191	0.641749	8.6061	8.8933
ARL4C	1		7.66065	-8.18705	3.78275	4.62083	7.18868	11.1401		3.12809	-8.92619	0.924509	0.996988	2.7026	6.55966		3.44612	-7.54784	2.83256	2.5607	8.4752	12.1883
ARL4D	1		4.36799	6.55229	0.810534	1.25767	7.62148	6.24201		0.0909055	5.2889	0.635878	0.92103	4.697	3.20812		0.147309	4.79112	0.600034	1.40486	9.848	8.219
ARL5A	0		0	-1.60981	0.252958	0.169169	9.78493	9.96617		0	-0.181367	0.110345	0.141386	4.87072	4.89421		0	-0.385324	0.221409	0.304064	9.5142	9.44365
ARL5B	0		0.0371774	-4.29131	1.71363	0.442116	7.95685	8.84198		0	-2.82709	0.208081	0.16595	3.38032	3.86922		0	-1.7679	1.02985	0.838571	6.6183	7.01165
ARL5C	0		0	-0.971207	2.48146e-05	0.00784421	1.88796	1.88795		0	2.41664	0.158446	0.0328765	0.411019	0.197552		0	4.03669	0.491194	0.320026	1.0113	0
ARL6	0		0	-0.419993	0.577262	0.736954	3.51608	3.56729		0	0.100661	0.114008	0.228584	2.30053	2.24871		0	-1.76328	0.165754	0.50221	5.7661	5.9802
ARL6IP1	0		0	2.17352	0.579693	0.813555	11.3001	11.0009		0	1.3196	0.319043	0.306889	6.57682	6.31063		0	0.0229452	0.364546	0.467213	12.007	12.0716
ARL6IP4	0		0	1.38325	0.186895	0.138994	9.27126	9.12409		0	2.2566	0.109168	0.13769	5.82483	5.41161		0	-1.32374	0.310928	0.623202	11.4218	11.4806
ARL6IP5	0		0	-2.0926	0.547555	0.533236	11.6217	11.8927		0	0.612924	0.179335	0.221648	6.1048	5.94591		0	0.217285	0.340856	0.708555	11.6934	11.7502
ARL6IP6	0		0	1.78136	0.208187	0.539738	9.63487	9.36287		0	0.0896798	0.233988	0.374874	3.34028	3.30449		0	-1.44284	0.347731	0.417599	8.3403	8.41885
ARL8A	0		0	-0.149263	0.200039	0.30575	6.60866	6.4541		0	0.958329	0.0928744	0.153896	4.21045	4.06011		0	-0.219238	0.147803	0.196355	9.9711	10.0689
ARL8B	0		0	3.31464	0.380182	0.214019	11.4082	11.0095		0	1.52345	0.121709	0.301308	5.78393	5.432		0	3.95451	0.117844	0.237053	11.3618	10.9024
ARL9	0		0	-1.55672	0.245777	0.905023	2.37396	2.38749		0	-1.54968	0.14264	0.246845	0.675201	0.860558		0	-1.53117	2.42908	1.92918	3.7692	4.271
ARMC1	0		0	4.06925	0.362934	0.337686	10.3249	9.66884		0	2.54243	0.108449	0.20918	4.99684	4.51434		0	2.37821	0.231767	0.613289	9.9372	9.4929
ARMC2	0		0	0.246337	0.000831422	0.000116778	2.29377	2.29594		0	-2.28572	0.111913	0.151183	1.53671	1.8125		0	-2.79055	0.395319	0.381462	5.0236	5.6705
ARMC3	0		0	-0.788001	2.79337e-05	4.72454e-05	2.1085	2.10968		3.18347	9.00156	0.329642	0.0925125	1.67829	0.164082		0	4.17018	1.64271	0.735234	1.7635	0.3028
ARMC4	0		0	-0.310638	0.0337232	0.0515082	2.2017	2.20512		0	2.5262	0.198976	0.252021	1.38631	0.99285		0	0.88022	2.11782	6.64899	5.0355	3.94485
ARMC5	0		0	-0.510986	0.69205	0.557865	6.60141	6.42991		0	-1.47732	0.0789466	0.28255	2.84932	2.94817		0	-2.69973	0.198996	0.543665	8.4005	8.91275
ARMC6	0		0	-2.23666	0.190554	0.303713	5.79713	5.9715		0	-3.80624	0.185069	0.248596	3.23975	3.90992		1.11944	-5.59492	0.216015	0.20505	9.0483	9.64585
ARMC7	0		0	-0.924206	0.121082	0.130343	6.81734	6.83881		0	-2.53677	0.18703	0.0652048	2.45484	2.57848		0	-2.35074	0.180417	0.280488	8.1444	8.3714
ARMC8	0		1.7248	5.18304	0.415234	0.44116	8.00696	7.17676		0	2.85716	0.0497354	0.244148	4.67387	4.01103		0	2.60102	0.0816818	0.317321	9.7742	9.54195
ARMC9	0		0	-0.354712	1.02206	1.10751	5.56172	5.30189		0	-2.13465	0.368386	0.758411	2.77325	3.32753		0	-1.08465	1.10369	1.46946	8.0018	8.2309
ARMCX1	0		0	0.574352	0.312499	0.561585	10.2029	10.1905		0	1.28634	0.178717	0.412194	4.62111	4.30342		0	0.416168	0.271008	0.573117	9.8415	9.65865
ARMCX2	0		0	-0.874893	1.97426	2.87011	9.45938	9.71148		0	1.05118	0.390332	0.990397	4.39421	4.28703		0	-2.21984	0.693487	0.71969	9.9347	10.6092
ARMCX3	0		0	-1.44664	0.238763	0.424725	10.0171	10.0919		0	-0.145243	0.0840506	0.45522	5.16238	5.30234		0	-0.516732	0.161679	0.762301	10.6891	11.0157
ARMCX5	0		0	-2.16947	1.08945	0.894527	5.47004	5.66665		0	1.07522	0.0700399	0.310458	2.88226	2.79737		0	-0.678603	0.229003	0.561315	7.7883	8.00445
ARMCX6	0		0	0.131544	0.349065	0.367175	10.427	10.4064		0	0.0668001	0.178345	0.329874	4.20073	4.04333		0	-0.125256	0.216368	0.528199	7.7107	7.79675
ARNT	0		0	-2.89643	0.225371	0.30721	8.17939	8.44432		0	-2.31488	0.0524858	0.182867	4.61535	5.04449		0	0.797745	0.104611	0.207113	10.6474	10.53
ARNT2	0		0	3.773	2.14084	4.49099	6.28202	4.63491		0	2.05075	0.880985	1.00071	2.94586	2.5437		0	4.48319	2.3485	1.71812	10.0588	7.9356
ARNTL	0		0	-1.87948	0.780979	0.60622	6.33339	6.52605		0	-1.93566	0.154318	0.280536	2.55527	2.81304		0	0.398736	0.229435	0.896235	7.7052	7.66735
ARNTL2	0		0	-1.3451	1.6718	3.51246	4.8404	5.23832		0	-1.53062	0.346795	1.46218	3.06639	3.34818		0	0.388709	1.29253	3.37042	6.7702	7.42545
ARPC1A	0		0	0.756902	0.442991	0.573794	10.0716	10.0426		0	-0.0902355	0.123224	0.247873	5.60628	5.46962		0	-2.02858	0.193436	0.392037	11.1179	11.3339
ARPC1B	1		2.3123	-5.49034	0.824802	1.11607	9.17429	10.3592		0	-4.94001	0.402236	0.284138	5.12671	5.95352		3.9324	-7.97274	0.490721	0.422775	10.9105	12.4839
ARPC2	0		0	-0.527348	0.284106	0.372845	12.7311	12.7941		0	-0.94261	0.225047	0.157244	6.723	6.8149		0	-3.39737	0.225795	0.197699	12.3231	12.639
ARPC3	0		1.86787	-5.24531	0.195188	0.269185	11.1423	11.6251		0	-2.36664	0.0794274	0.101831	6.66621	6.958		0	-4.05159	0.156804	0.5577	10.8953	11.7506
ARPC4	0		0	-0.181452	0.245022	0.536614	8.56238	8.40719		0	-0.214085	0.0815403	0.0891284	6.10805	6.22526		0	-2.2342	0.09299	0.43074	11.8892	12.1058
ARPC5	0		0	2.06439	0.213521	0.474979	12.2773	12.0427		0	3.41131	0.142079	0.0860685	6.84704	6.60784		0	0.0468027	0.285729	0.553451	12.3488	12.4726
ARPC5L	0		0	0.0882971	0.264714	0.318826	9.48274	9.39729		0	-0.382351	0.191872	0.322216	3.57612	3.60503		0	-2.44694	0.232868	0.462126	9.5527	10.0061
ARPP19	1		8.7756	8.69775	0.23983	0.320412	11.1729	10.2324		2.20443	7.72488	0.167347	0.0692434	6.54209	5.76011		0.753879	5.29315	0.219847	0.402298	12.3052	11.4205
ARPP21	0		0	-0.00891284	0.907058	0.981848	2.77702	2.7915		0	-0.195278	0.308104	0.100542	0.0752185	0.175549		0	-1.94247	4.11209	11.0167	1.5324	2.5171
ARR3	0		0	-1.00851	0.0144534	0.0230381	2.8604	2.87778		0	0.561831	0.0653389	0.0497523	0.540103	0.53844		0	-0.0341792	0.0772053	0.141576	0	0
ARRB1	1		2.38773	-5.53779	0.250071	0.664707	5.09567	5.87988		0	-2.5176	0.52212	0.585205	2.02638	2.93188		0	-1.38678	0.965341	1.25787	7.9518	8.2087
ARRB2	0		0	-2.50828	0.580642	1.23598	6.03402	6.44317		0	-1.65346	0.211018	0.207305	3.7587	4.03714		0	-1.25344	0.536661	0.831118	9.6353	10.041
ARRDC1	1		3.13661	-5.94986	0.106205	0.319582	3.76677	4.20213		0	-4.83711	0.168544	0.0647032	3.00209	3.42969		0	-2.60862	0.220295	0.700088	8.0253	8.62905
ARRDC2	0		0	0.564589	0.8555	0.433896	6.58711	6.40297		0	1.29799	0.330755	0.65442	3.92252	3.61416		0	0.775008	0.600738	1.00405	9.7508	9.7638
ARRDC3	0		0	1.93482	0.605254	0.856286	9.37159	8.95357		0	-1.06048	0.38393	0.392969	5.62701	5.93003		0	1.74828	0.70172	0.86983	10.8542	10.2907
ARRDC4	0		0	-1.63182	2.8241	2.40256	7.48924	7.80283		0	-0.0448338	1.31952	1.13681	3.37249	3.30107		0	0.281365	2.84588	1.24667	8.789	8.71145
ARSA	0		0	-1.81544	0.0553771	0.198426	2.28495	2.30069		0	-2.13639	0.22355	0.222304	3.0046	3.28819		0	-1.98376	0.420649	0.943304	9.1187	9.4038
ARSB	0		0	1.65306	0.365422	0.230534	3.58973	3.41228		0	0.127478	0.279176	0.125809	4.04531	3.97844		0	3.404	0.38742	0.316486	10.0311	9.39145
ARSD	1		2.20253	5.47563	0.893605	0.76973	7.88614	6.8144		0	1.27037	0.436741	1.03073	3.55462	2.96983		0	1.62994	0.681232	0.626218	10.0832	9.6474
ARSE	0		0	-0.31354	0.839421	0.894365	2.20998	2.21457		0	-2.29189	0.941594	1.08116	0.232125	1.35957		0	-2.88409	7.37889	11.3105	1.536	6.13075
ARSF	0		0	1.19265	0.3786	0.092567	2.35089	2.34972		0	-0.292664	0.317659	0.40654	0.3594	0.300202		0	1.96283	4.80233	1.75381	1.7603	1.06385
ARSG	0		0	-1.84186	0.0174098	0.720028	2.54763	2.56366		0	0.425633	0.555436	0.218928	1.64761	1.65444		0	-0.156576	2.41538	0.990332	5.8052	5.75775
ARSI	0		0	-2.48357	0.953168	2.21068	2.18384	2.79044		0	1.02652	0.370903	0.558845	2.7776	2.46561		0	0.236746	1.274	6.08333	8.3598	8.6991
ARSJ	0		0	-1.88769	1.15064	1.8205	3.15933	3.46072		0	-2.62577	0.854101	0.710661	2.16821	2.92084		0	-1.72625	2.16016	3.25227	7.3398	8.39425
ARSK	0		0	-1.72764	0.989665	1.26162	3.83503	4.30021		0	-1.79117	0.206962	0.126386	2.71628	2.73059		0	-0.177201	0.252011	0.663646	7.8522	7.9014
ART1	0		0	-1.0872	0.000193118	0.000293783	2.3464	2.34618		0	0.625328	0.0199814	0.00844408	0.0850285	0.0898161		0	-1.65921	0.199402	5.02835	0	0
ART3	0		0	-0.117868	1.10034	1.794	2.28317	2.28567		0	1.71743	0.339634	0.106181	0.448042	0.303858		0	-0.363127	2.94025	6.37897	2.0833	1.4019
ART4	0		0	1.44072	1.04426	0.0628026	2.51327	2.51086		0	1.83679	1.69061	0.717987	0.457461	0.272175		1.86344	6.20933	6.49111	1.62077	3.0978	0
ART5	0		0	-1.27185	0.00101081	0.0018922	2.26256	2.26736		0	-1.46632	0.0373414	0.276219	0.08306	0.114877		0	-0.365509	2.23015	3.60766	1.6235	1.1748
ARTN	0		0	1.87641	0.775824	0.544047	2.6619	2.54976		0	4.62954	0.767347	0.346323	2.36822	0.762114		1.61652	6.00475	1.67706	2.93362	6.7611	3.6859
ARV1	0		0	3.78785	0.663259	1.04396	8.63951	7.76582		0	2.89082	0.0791117	0.1049	3.72644	3.37397		0	3.36421	0.240078	0.373569	8.4502	7.9207
ARVCF	0		0	1.13016	0.31832	0.34251	6.8592	6.8433		0	3.62211	0.43446	0.247003	2.82505	2.09848		0	2.31377	0.729056	2.70704	8.9579	7.5953
ARX	0		0	-0.289449	1.88457	1.15992	3.22305	3.28373		0	-0.247193	0.00319641	0.00576971	0.0900567	0.0971729		0	-2.25491	0.501145	5.17268	0.4647	1.1089
AS3MT	0		0	3.8939	1.21277	0.514491	4.90224	4.22572		0	2.61939	0.146309	0.584935	3.29352	2.63712		0	2.85556	1.15344	1.05288	8.0711	7.26175
ASAH1	0		0	-0.846714	0.79437	0.620747	11.3438	11.5609		0	-1.22731	0.258909	1.04779	5.73483	5.84085		0	0.40803	0.76567	0.367723	11.0827	11.0166
ASAH2B	0		0	-0.667914	0.352784	0.453661	2.24768	2.24551		0	0.000534979	0.0980168	0.133721	1.90527	1.78706		0	-0.104182	1.50183	2.29793	2.4437	2.7322
ASAP1	0		0	-3.3826	0.414403	0.54177	9.8621	10.3894		3.35503	-9.23754	0.142906	0.0903421	4.01248	5.07921		0	-0.843777	0.257117	0.776916	10.6618	10.721
ASAP2	0		0	-1.91647	0.464872	0.800834	8.99873	9.20292		0	0.425838	0.298053	0.157616	4.14376	4.01256		0	-0.260382	0.516642	0.807358	9.7366	10.1644
ASAP3	1		10.4148	-9.45758	0.953481	1.34792	5.76276	8.02422		3.94205	-10.0767	0.177403	0.339039	2.43959	4.3543		6.88638	-10.766	0.448431	0.52143	7.8385	10.0408
ASB1	0		0	-0.529649	0.253101	0.936534	6.45415	6.46576		0	0.597863	0.18316	0.360867	3.30929	3.16933		0	0.0928678	0.354468	0.566784	9.3822	9.51325
ASB10	0		0	-1.0111	6.34355e-05	0.432694	2.25505	2.2544		0	-0.131482	0.00164739	0.00182968	0	0		0	-1.81125	0.0812379	6.83135	0	0
ASB11	0		0	0.184685	0.893014	0.705169	2.34918	2.35216		0	-0.563024	0.380687	1.24979	0.694721	0.807938		0	-0.242687	1.19732	3.29096	0	0
ASB12	0		0	-1.28518	0.357687	1.10294	2.81838	2.83533		0	4.14618	0.0750625	0.0559917	0.543277	0.17567		0	2.96549	0.998008	3.99222	3.1678	0.89545
ASB13	0		0.718893	-4.59912	0.573457	0.578154	5.61858	6.27068		0	-1.22758	0.17722	0.616048	2.43097	2.79049		0	-1.60548	0.513887	0.598563	7.7391	7.9091
ASB14	0		0	0.470288	0.00635742	0.00302941	2.3086	2.30686		0	2.91714	0.123205	0.0854693	2.45972	2.06054		0	-1.1721	0.553173	2.13416	3.1657	3.6045
ASB15	0		0	-1.31066	0.00132386	0.345419	2.46478	2.46981		0	0.0183762	0.0127416	0.00357419	0.0827031	0.119601		0	-1.84984	0.0239252	5.87277	0	0
ASB16	0		0	-1.04891	0.000394065	0.0411187	2.29705	2.30176		0	4.33525	0.171212	0.0549093	2.44406	2.06389		0	4.57843	0.745811	4.16981	5.873	3.15295
ASB17	0		0	-0.701986	0.000153226	0.000151056	2.35202	2.35602		0	0.785144	0.107344	0.0799067	0.20627	0.0991134		0	1.69642	0.0304903	0	0	0
ASB2	1		42.6367	28.4417	0.807481	2.1553	10.0557	2.56366		5.90695	13.2929	0.128278	1.5759	6.20329	0.624144		6.43224	10.3088	0.339167	6.90414	12.2086	5.2797
ASB3	0		0	-3.55946	0.435798	0.478835	7.92391	8.39557		0	-2.07523	0.0747688	0.317279	3.80644	4.23105		0	-1.64779	0.128005	0.700784	7.9203	8.29405
ASB4	0		0	0.133136	0.547457	0.712783	2.76035	2.77411		0	-0.468565	0.0324274	0.0501233	0.467977	0.515299		0	-1.5042	0.4868	3.26775	0	0.2347
ASB5	0		0.129439	4.33088	12.0711	3.9952	4.21161	2.75983		0.569313	5.81162	3.01056	0.0279637	1.72783	0.104502		0	0.627583	8.32981	17.0727	5.2692	4.31895
ASB6	0		0	-2.71147	0.935071	0.589735	5.67495	6.36541		0	-2.37174	0.0924736	0.168653	3.32114	3.61957		0	-0.579346	0.105621	0.257226	9.6889	9.60895
ASB7	0		0	2.03121	0.817304	0.766284	6.78555	6.29489		0	0.828413	0.139151	0.053267	3.4457	3.36214		0	3.07555	0.195356	0.250485	8.7985	8.5123
ASB8	0		0	0.532956	0.509905	0.580369	7.13605	7.1423		0	2.64343	0.139549	0.0816788	4.18374	3.81946		0	1.31399	0.229127	0.564765	9.754	9.26475
ASB9	0		0	0.41715	0.176648	0.0505927	2.66015	2.67841		0	-1.0879	0.381738	0.516564	1.12837	1.3584		0	-1.29819	1.46706	2.4319	4.2862	5.08515
ASCC1	0		0	-3.33288	0.513808	0.689598	6.65954	7.26296		0	-0.323183	0.184192	0.0819305	3.3307	3.3992		0	-0.303033	0.234453	0.193119	8.7607	8.78395
ASCC2	0		0	-0.248533	0.287095	0.446838	7.39647	7.47399		1.70382	-7.11347	0.0644738	0.0323694	3.71901	4.26109		0	-2.36918	0.0980893	0.301102	10.4509	10.6436
ASCC3	0		0	0.85242	0.551576	0.673677	7.93938	7.95598		0	1.9891	0.20388	0.20878	5.02645	4.57592		0	0.0936465	0.437098	0.623706	9.7602	9.9703
ASCL1	0		0	-1.68941	0.000118911	0.00125029	2.41564	2.42073		0	-3.68535	0.00130449	0.00788659	0.0105216	0.0905183		0	-2.7491	0.0922605	1.71875	0	0.7907
ASCL2	0		0	-2.10647	0.0219564	0.184009	2.67181	2.69295		0	-0.923617	0.0754312	0.137944	0.357938	0.441393		0	-3.6458	1.81163	3.03518	2.9022	4.48525
ASCL3	0		0	1.02441	3.18017e-05	1.82721e-05	2.01432	2.01264		0	1.24815	0.0853343	0.114379	0.680694	0.470113		0	2.45228	0.23639	0.0795094	0	0
ASF1A	0		1.1102	4.82311	0.581698	0.677338	8.66276	7.84201		0	3.31034	0.165798	0.381269	4.41421	3.56853		0	2.13066	0.166019	0.313931	9.2382	8.7565
ASF1B	1		5.17491	7.12303	2.31421	1.5968	7.13684	4.86563		0	2.86342	0.960609	1.25162	4.82079	4.06477		1.28639	5.73236	1.22424	0.558061	10.4189	9.20185
ASGR1	0		0	-1.59431	0.00358386	0.104933	2.06794	2.07327		0	-4.0412	0.0368499	0.0417456	0.28882	0.660099		0.876372	-5.39424	1.48726	0.898473	3.7563	5.07015
ASGR2	0		0	-2.56015	0.00218821	0.0340001	2.58839	2.59321		0	-0.0726104	0.106322	0.0318942	0.291798	0.334014		0	-1.91923	2.06225	1.77352	2.8042	4.02735
ASH1L	0		0	0.226643	0.137884	0.526374	9.77088	9.52137		0	1.46157	0.0715274	0.15438	5.15421	4.86932		0.119183	4.76758	0.276879	0.583099	11.2053	10.0986
ASH2L	0		1.2991	4.93203	0.330057	0.389911	9.83482	9.12398		0	3.74711	0.272014	0.187494	4.43874	3.84234		0	4.16695	0.228647	0.247622	10.7923	10.2208
ASIP	0		0	-1.02086	0.000155115	0.0540522	2.03999	2.04051		0	-4.28092	0.152977	0.246754	0.47142	1.21925		0	-2.91836	0.415926	0.99267	0.7465	1.3663
ASL	0		0	-3.45335	0.8566	1.49425	5.70942	6.68276		0	-4.30172	0.153993	0.0942364	2.98903	3.55811		0.439866	-5.03379	0.443847	0.455104	8.4461	9.21725
ASMT	0		0	-1.65473	0.000650838	0.00393573	2.78222	2.79288		0	0.580646	0.0887648	0.0845721	0.985827	0.954392		0	2.085	0.929304	1.02433	1.7181	0.94335
ASMTL	0		1.33412	5.00484	1.13155	0.79111	9.64683	8.46014		0	2.65519	0.128703	0.379702	4.24737	3.75161		0	3.04298	0.341006	0.687282	10.4506	9.774
ASNA1	0		0	-1.24433	0.376001	0.486529	8.23411	8.5212		0	-0.488358	0.200915	0.60229	4.93584	5.32212		0	-0.282851	0.165023	0.262911	10.5647	10.6279
ASNS	0		0	2.49103	0.587141	1.80315	8.79001	8.27293		0	1.19508	0.250023	0.262391	4.33547	4.11229		0	0.669154	0.558677	1.44428	9.4562	8.96475
ASNSD1	0		0	0.44529	0.220628	0.316982	9.22896	9.1436		0	0.621612	0.101803	0.0910354	4.5415	4.422		0	-0.155223	0.115501	0.143828	9.9438	9.9053
ASPA	0		0	-1.3745	4.61969	7.52716	2.37771	2.39601		0	1.46321	2.81201	2.98336	3.1095	0.658193		0.413482	5.01179	3.35807	4.92779	6.1128	1.91185
ASPDH	0		0	-0.610977	0.242675	0.236186	4.35167	4.35392		0	-0.95606	0.223215	0.14873	0.880535	1.02698		0	-0.286813	0.34472	0.523143	0.4832	0.26075
ASPG	0		0	1.64009	0.000819832	0.000506753	2.15768	2.15485		0	-0.50355	0.0580787	0.0379657	0.0312629	0.0358634		0	-1.78674	0.594545	2.54551	0	0.2103
ASPH	0		0	-0.255359	0.458431	0.753672	10.2866	10.4525		0	-0.623243	0.221535	0.216367	6.69662	6.59271		0	2.41189	0.220063	0.392343	12.3594	12.0425
ASPHD1	0		0	-0.192325	0.859002	2.06063	3.29183	3.13221		0	1.05087	0.871253	0.917456	1.33159	0.608311		0	0.0456603	5.44699	4.19464	6.573	5.42895
ASPHD2	0		1.76483	-5.44803	0.00131394	0.599428	2.79209	2.84337		1.12959	-6.44166	0.0637987	0.259787	1.03743	2.08378		3.68691	-7.75729	0.557805	0.979905	5.5395	7.32985
ASPM	0		0	1.92637	2.36311	3.01984	9.67054	8.87605		0	-0.731034	0.919919	0.468986	4.51021	4.67589		0	-0.85702	1.71808	0.589836	9.4801	9.53315
ASPN	0		0	0.919544	1.60432	6.44932	10.9323	10.8121		0	-1.80659	1.15404	5.23103	5.09832	6.53245		0	0.205464	1.83243	9.81044	10.311	10.4182
ASPRV1	0		0	-0.52536	0.0456854	0.0501309	3.04357	3.06032		0	0.647598	0.2948	0.246942	1.14839	1.05906		0	2.98281	0.757997	1.41977	6.3395	5.48385
ASPSCR1	0		0	-2.34036	0.896821	1.08414	5.24262	6.14694		0	-2.03236	0.308668	0.25216	3.55396	3.84806		0	-2.48032	0.357144	0.592365	8.8336	9.2275
ASRGL1	1		5.13662	7.05628	1.72581	1.37646	6.38893	4.45148		0	3.64323	0.361639	0.5072	2.03956	0.989993		0.386755	4.9896	0.554249	1.27932	7.3499	6.0919
ASS1	0		0	2.3895	1.76202	8.07492	8.69066	7.91555		0	0.785969	0.629419	0.970331	4.15381	4.17087		0	1.06318	0.802999	5.9461	10.0111	9.62245
ASTE1	0		0	1.39005	0.597294	0.574661	6.33738	6.19807		0	0.847171	0.0706411	0.110336	2.69271	2.59109		0	0.510249	0.118353	0.225188	7.5602	7.5098
ASTN1	0		0	1.91811	2.66177	0.944804	2.25859	2.25248		0	4.32315	1.76882	0.126404	1.49192	0.263811		0	4.03447	6.17879	10.6929	7.6792	2.51325
ASTN2	0		0	0.995042	1.79468	1.89863	4.41373	4.19442		0	-0.387543	0.0844421	0.344764	5.58974	5.70019		0	-0.333877	1.1914	4.09364	7.066	6.58865
ASXL1	0		0	0.395085	0.436915	0.535631	8.67972	8.58919		0	-2.49638	0.0765095	0.033137	4.90085	5.10784		0	2.76519	0.122241	0.112657	11.0618	10.8996
ASXL2	0		0	-3.64753	0.299437	0.184544	9.81094	10.1483		0	-4.04408	0.0630738	0.0591976	3.25467	3.56166		0	0.931873	1.06576	2.02045	8.6144	8.31975
ASXL3	0		0	0.693639	1.32826	0.53776	2.53455	2.54627		0	2.79588	1.16026	0.110808	0.601041	0.348743		0	2.29833	7.05091	6.99109	5.3618	0.8586
ASZ1	0		0	-1.56351	0.00112841	0.00124751	2.65538	2.67048		0	-2.89583	0.000376713	0.0117872	0	0.0880511		NA	NA	0	0	0	0
ATAD1	0		0	0.160418	1.96031	0.936654	8.91665	8.66853		0	1.13676	0.553443	0.351323	3.98082	3.84139		0	0.402248	0.479414	1.44921	9.3057	9.4022
ATAD2	1		9.97042	9.26546	0.637266	1.5732	9.69483	7.82459		0	3.32856	0.313123	0.898429	5.30008	4.65076		2.7748	6.97306	0.486716	0.740095	11.0398	9.63635
ATAD2B	1		2.88549	-5.85315	0.838022	0.715649	5.37542	6.30228		0	-1.61331	0.152016	0.0699587	3.25461	3.44266		0	-2.13468	0.318036	0.943373	7.2873	8.0783
ATAD3A	0		0	-3.45688	0.554006	0.517186	6.65042	6.96407		0	-4.25079	0.290585	0.515391	2.84546	4.00204		0.0324675	-4.69524	0.396779	1.01601	9.1346	10.4326
ATAD3B	0		0	-4.11027	0.368413	0.564617	5.89619	6.37954		0	-2.63424	0.884978	0.190173	3.76253	4.33617		0.626734	-5.18835	0.57282	0.856892	7.9564	9.1732
ATAD3C	0		0	1.82312	0.524197	0.21527	3.40596	3.26368		0	0.868655	0.118105	0.0504772	1.37433	1.35859		0	-0.367044	1.62467	1.16416	4.0896	4.11
ATAD5	0		0	1.33403	0.10499	0.0516251	2.50043	2.50014		0	-0.195252	0.211304	0.164918	2.9821	2.70854		0	2.2792	0.719538	0.839627	6.9894	6.49425
ATCAY	0		0	-0.108332	1.02794	1.15994	3.29621	3.3549		0	2.61507	0.199735	0.052739	1.58338	1.38082		0.160173	4.80193	3.96247	3.09731	3.9681	1.1966
ATE1	0		0	0.747079	0.569688	0.520722	6.38109	6.36826		0	2.13371	0.105571	0.145966	3.71594	3.56263		0	1.7026	0.845867	1.24267	7.1957	6.62945
ATF1	0		0.158447	-4.27375	0.481144	0.351874	9.0376	9.64161		0	-2.06636	0.117163	0.207991	3.5103	3.69598		0	-3.96592	0.247543	0.485102	8.2891	8.7556
ATF2	0		0	2.17498	0.268697	0.343785	9.89851	9.67081		0	2.09702	0.0836429	0.0872314	5.01539	4.60146		0	1.49028	0.516699	1.10698	8.7583	8.2774
ATF3	1		11.3701	9.92026	1.4507	3.51478	9.5211	6.40729		0	3.07651	1.03548	1.91973	4.48446	2.25146		0	3.76099	1.52533	3.66772	10.7232	8.8736
ATF4	0		0	1.02204	0.317739	0.251826	11.7949	11.6728		0	2.05371	0.181246	0.164948	7.61327	7.40621		0	1.41232	0.288437	0.444945	12.9445	12.5841
ATF5	0		0	-3.0687	0.347486	1.08817	6.90917	7.3105		0	-3.52135	0.241721	0.545964	2.8224	3.53646		0	-2.8975	0.516167	0.593882	9.6123	10.3426
ATF6	0		0	0.859833	0.817911	0.439132	8.18469	8.29057		0	2.48207	0.170608	0.148567	4.61784	4.29194		0.661681	5.21729	0.326543	0.116818	10.5329	10.1044
ATF6B	0		0	-4.01845	0.067294	0.236356	4.49512	4.65589		0	-3.21649	0.155956	0.0616543	4.09777	4.40979		0	-3.61133	0.229532	0.189224	10.4849	10.9712
ATF7	0		0	-2.34602	0.430287	0.328791	6.56064	6.88389		0	-0.401615	0.175691	0.0658906	3.95918	3.89472		0	2.27409	0.365708	0.471097	10.6666	10.2402
ATF7IP	0		0	0.198378	0.215358	0.286483	10.4144	10.5368		0	1.49494	0.108317	0.119667	5.04119	4.74251		0	2.10342	0.449932	0.476744	9.9628	9.4028
ATF7IP2	0		0	-2.5245	0.469773	1.36486	2.80119	2.86758		0	0.715227	0.352595	0.376459	1.6809	1.44718		0	-2.23952	1.09459	2.31641	4.4283	4.97565
ATG10	0		0.834569	4.72711	0.957049	0.545895	6.28898	5.30471		0	0.191563	0.0875819	0.181909	2.92429	2.94256		0	2.34802	0.289685	0.32915	7.0314	6.6787
ATG12	0		0	0.66953	0.201133	0.377566	9.97971	9.88281		0	-1.26055	0.0734732	0.0791063	4.33016	4.34958		0	-0.807887	0.115461	0.359048	9.3663	9.2994
ATG16L1	0		0	2.53725	0.309861	0.422454	5.63127	5.26097		0	1.86763	0.0929065	0.285389	3.70575	3.24348		0	2.15974	0.208227	0.400841	9.5734	9.1559
ATG16L2	0		0	0.715621	1.53903	1.82388	5.57857	5.52489		0	0.754877	0.19511	0.089454	3.55485	3.36597		0	2.46601	0.69805	0.986583	8.8855	8.31835
ATG2A	0		0	-0.732996	0.275955	0.160283	7.12122	7.20146		0	0.356244	0.145388	0.181111	3.00792	2.87859		0	2.34906	0.213834	0.276692	9.9269	9.43955
ATG2B	0		0	-0.00222725	0.245723	0.598656	8.71762	8.70012		0	0.357775	0.0357297	0.097523	3.77804	3.70111		0	1.58045	0.309981	0.397894	9.829	9.59325
ATG3	0		0	3.24203	0.1184	0.256234	10.8701	10.6174		0	0.853271	0.146604	0.236994	5.14599	4.91071		0	1.0191	0.1609	0.275423	9.9093	9.74185
ATG4A	0		0	0.857002	1.4579	0.856117	7.11669	6.68268		0	0.24107	0.124978	0.162513	3.15557	3.00337		0	-0.0621857	0.186928	0.34296	8.3103	8.33815
ATG4B	0		0	-1.37859	0.257367	0.497293	7.7578	7.92645		0	-0.349932	0.124221	0.119667	3.90755	3.90675		0	-1.96358	0.19645	0.192013	9.8909	10.0737
ATG4C	0		1.83692	-5.24562	0.516688	0.55357	6.52665	7.01275		0	-4.53727	0.0635053	0.11226	3.06321	3.60491		0	-3.63656	0.0987033	0.26409	7.5133	7.93805
ATG4D	0		0	2.73779	0.254916	0.288255	6.69555	6.3919		0	2.71274	0.212765	0.329317	3.69206	3.18248		0	3.48003	0.263652	0.272798	8.5106	8.06275
ATG5	0		0	1.39268	0.292079	0.607959	8.53978	8.42478		0	2.91621	0.125764	0.106226	4.46872	4.0219		0	0.199715	0.160685	0.121696	9.7156	9.63375
ATG7	0		0	-1.43132	0.382388	0.622713	6.84466	6.93049		0	-4.7137	0.0951102	0.0935978	4.12227	4.48736		0	-3.2132	0.105678	0.195234	9.5277	9.8788
ATG9A	0		0	-1.01442	0.311761	0.6443	6.9956	7.04636		0	0.747677	0.116644	0.147593	3.93591	3.85413		0	-0.665218	0.171828	0.28944	10.8534	10.83
ATG9B	0		0	-1.71426	0.000278256	0.028577	2.4182	2.41943		0	-1.14215	0.0563444	0.0665239	0.112786	0.259192		0	-2.66209	0.848507	2.77602	3.1004	3.99725
ATIC	0		0	1.47946	0.362462	0.860479	9.26452	9.01773		0	-1.01939	0.118036	0.219341	3.43246	3.33162		0	-0.0104007	0.206478	0.429596	10.4279	10.1535
ATL1	1		6.10495	7.43724	1.24909	3.38958	8.62751	6.57078		0.891215	6.17051	0.435542	0.395154	3.84827	2.36231		1.85214	6.19994	0.743056	2.7864	9.1122	6.3829
ATL2	1		3.16026	6.16168	0.634399	0.274023	10.1756	9.34419		0.611209	5.85801	0.26563	0.0777374	4.82275	4.25089		1.66713	6.04655	0.352461	0.273951	10.163	9.3064
ATL3	0		0	2.21425	0.508013	0.372602	11.1714	10.8241		0	4.39968	0.157377	0.180767	6.26935	5.70421		0	1.20303	0.644788	0.649346	9.3157	9.03785
ATM	0		0	-2.42474	0.722037	0.467403	8.67618	9.06586		0	-1.864	0.142615	0.162418	4.48234	4.63745		0	1.31246	0.361738	0.925242	9.9987	9.94485
ATMIN	0		0.569074	-4.55426	0.669316	0.403725	8.06373	8.6515		0	-2.64957	0.43549	0.332237	3.76284	4.24001		0	-3.82047	0.165071	0.129761	9.6848	10.1224
ATN1	0		0	0.114689	0.348859	0.338843	3.28557	3.34594		0	0.285102	0.341601	0.0732278	3.6902	3.50398		0	3.48631	0.174681	0.785802	12.7015	11.8883
ATOH1	0		0	0.793583	1.3228e-05	2.93383e-05	1.96467	1.96351		0	1	0.000309923	0	0	0		0	-0.0616748	0.0129987	0.0123664	0	0
ATOH7	0		0	-1.16345	0.000327668	0.0166665	2.61993	2.62044		0	-1.17018	0.0158427	0.0295898	0.0905473	0.167197		0	0.808324	0.693664	0.839929	1.0616	1.1347
ATOH8	0		0	-1.10959	0.486195	0.944808	3.04837	3.05629		0	-1.19626	0.139753	0.526946	0.598111	0.595205		0	0.226742	2.29274	3.83807	7.2725	7.4033
ATOX1	0		0	-3.07242	0.426393	0.451861	8.9067	9.4617		0	-3.92499	0.12181	0.236332	5.4118	6.00176		0	-3.78911	0.274764	1.03275	9.1778	10.0685
ATP10A	0		0	-0.816838	0.908907	1.56815	6.69492	7.09686		0	-2.69819	0.637255	0.714612	2.84809	3.70997		0	0.0470722	1.1767	3.6386	8.8215	8.88935
ATP10B	0		0	-1.752	0.00464105	0.0598113	2.43218	2.4488		0	-1.61186	0.00121241	0.0116427	0.0306763	0.0526553		0	0.79618	0.498722	0.222427	0	0
ATP10D	0		0	-3.16423	1.9608	1.84013	7.56141	8.51596		0	-3.52272	0.396723	0.393844	3.3896	3.97863		0	-3.02271	0.461053	1.06839	8.933	10.0755
ATP11A	1		2.572	-5.64627	0.795802	0.890335	7.89447	8.82037		0	-3.59457	0.178126	0.369858	2.53761	3.07463		0	-1.69162	0.501449	0.913657	9.0246	9.4565
ATP11B	0		0	0.142809	0.411304	0.28064	8.56744	8.52826		0	-0.232539	0.115693	0.258658	4.71043	4.60997		0	0.0880566	0.177328	0.284281	10.0853	10.0288
ATP11C	0		1.59811	5.10062	0.468331	0.57247	9.32051	8.79185		0	2.86136	0.142732	0.348007	4.42844	3.84104		0.68339	5.23518	0.214728	0.265863	9.7763	8.9826
ATP12A	0		0	0.326074	1.94535e-05	2.60395e-05	2.12172	2.12152		0	1.54238	0.0029971	0.000451439	0.00479938	0		0	0.0639051	0.567258	0.432113	0	0
ATP13A1	1		3.77433	-6.33759	0.475596	0.390328	7.55404	8.32835		0	-4.46052	0.0732222	0.282144	3.56567	4.36526		3.73102	-7.79585	0.199576	0.112978	10.0603	10.887
ATP13A2	0		0.852943	-4.65908	0.642873	1.04342	4.65648	5.61857		1.98027	-7.44788	0.208786	0.0746997	2.77965	3.53604		3.30095	-7.4224	0.513403	0.515888	8.9184	10.252
ATP13A3	0		0	-0.886717	0.390321	0.543013	9.71664	10.0598		0	-1.61694	0.253074	0.207294	5.38178	5.60644		0	0.903808	0.647093	0.273967	10.6163	10.6532
ATP13A4	0		0	-1.68082	0.00111496	0.001801	2.77344	2.78808		0	-1.09227	0.0263101	0.168927	0.480209	0.502574		0	0.0221151	0.643899	0.586875	0.9527	1.26355
ATP13A5	0		0	-1.27823	0.0094181	0.204504	2.44469	2.4485		0	-0.392587	0.0136985	0.00498916	0.0190236	0.0479088		0	0.666248	0.298902	0.107296	0	0
ATP1A1	0		0	-2.12041	0.194145	0.425541	9.82746	10.048		0	-1.86855	0.102791	0.149739	6.06245	6.34793		0	-1.63994	0.200386	0.242426	12.8692	13.1357
ATP1A2	0		0	-0.6447	5.29475	8.22123	2.92344	2.90601		0	3.91251	3.66646	0.386041	2.23644	0.493515		0	1.53413	12.6883	15.8534	7.8866	5.6971
ATP1A3	0		0	-1.07528	0.000148648	0.000242513	2.28965	2.29232		0	1.76237	0.134364	0.0184288	0.162941	0.122219		0	-0.566989	2.74198	9.60948	4.2045	4.80785
ATP1A4	0		0	-0.68949	0.000317635	0.000341698	2.43148	2.43675		0	0.464293	0.321351	1.02161	0.395745	0.0270371		0	2.95579	1.19946	1.0057	1.3828	0.547
ATP1B1	0		0	2.01114	1.56826	2.64114	11.902	11.1419		0	1.7143	0.551445	0.778469	5.34064	5.16066		0	0.131868	1.00945	2.68422	10.8366	10.87
ATP1B2	0		0	-0.533492	0.0407932	0.135252	2.60055	2.60576		0	-0.870067	0.0839004	1.36789	1.17023	1.1394		0	-0.881545	4.95047	5.26812	5.4205	5.15035
ATP1B3	0		0.163275	4.23956	0.27492	0.405967	11.6773	10.9487		0	0.625309	0.401404	0.173494	5.88139	5.5614		0	0.00129442	0.232289	0.520158	11.1911	11.1781
ATP1B4	0		0	-1.12778	0.607581	1.94437	2.70834	2.72589		0	-1.5792	0.0148828	0.0389909	0.669481	0.832892		0	-1.18395	2.23784	9.30341	0.4792	0
ATP2A1	0		0	-0.454689	1.38161	3.14917	3.04483	3.07298		0	0.354406	0.500261	0.398951	0.673891	0.526933		0	-1.2353	3.15538	13.4424	3.9208	4.3728
ATP2A2	0		0	1.83529	0.419537	0.554197	10.9716	10.6788		0.593932	5.83883	0.280637	0.0493306	6.4157	5.60844		0	2.64908	0.523245	0.990021	13.3654	12.6958
ATP2A3	0		0	1.96237	1.54017	1.78334	4.93339	4.76955		0	3.57029	0.43149	0.79366	2.91905	1.70225		0	1.82859	0.769654	3.70174	9.9821	8.3754
ATP2B1	1		5.42398	-7.10009	0.760895	0.933487	8.07942	9.63135		0	-4.30835	0.477636	0.343372	4.18439	5.12655		3.61278	-7.69252	0.583386	0.449385	9.4429	10.7971
ATP2B2	0		0	1.70357	3.67957	1.02856	2.57467	2.58617		0	1.51154	1.03825	0.0996619	0.11979	0.0964029		0	0.818259	7.78286	7.01664	2.6844	2.24655
ATP2B3	0		0	0.439418	0.37272	0.152056	2.87789	2.87914		0	-0.185404	0.0565831	0.170301	0.261261	0.158428		0	3.16558	1.68755	3.36454	3.7793	1.8246
ATP2B4	1		6.41538	7.57636	0.634656	0.820961	11.1479	9.70201		2.91778	8.64357	0.211019	0.280352	6.65882	4.91194		2.88644	7.06774	0.499145	1.49707	13.5355	11.1449
ATP2C1	0		0	-3.52229	0.378245	0.397708	7.38171	7.74409		0	-3.49479	0.0748459	0.046705	4.79245	5.07851		0	-3.71653	0.124038	0.166551	10.4098	10.8326
ATP2C2	0		0	-1.63582	0.000428614	0.247492	2.71031	2.7188		0	-0.494818	0.0481833	0.0853422	0.449018	0.457511		0	0.736589	1.11274	0.916291	2.1869	2.0156
ATP4A	0		0	-0.963925	3.88148e-05	6.93965e-05	2.0008	2.00101		0	-1.02319	0.00155719	0.00653216	0.0437015	0.0473104		0	-1.16561	0.120754	0.213187	0	0
ATP4B	0		0	-1.7261	0.000172036	0.0106326	2.32378	2.32856		0	0.0944471	0.00933132	0.00686938	0.0613554	0.082588		0	-2.16336	0.0478416	0.190515	0	0
ATP5A1	0		0	-1.74958	0.239694	0.189368	12.926	13.0716		0	0.630062	0.256125	0.414073	7.27341	6.90788		0	-0.801469	0.170845	0.280428	12.8936	12.7697
ATP5B	0		0	-1.73608	0.299312	0.301918	10.9479	11.2041		0	0.281548	0.136529	0.288258	7.39694	7.30182		0	-3.93924	0.234279	0.1818	12.9739	13.5274
ATP5C1	0		0	-1.46326	0.342685	0.371789	11.3101	11.6029		0	1.39125	0.182041	0.191393	6.46398	6.21303		0	-2.38665	0.253195	0.446316	10.9465	11.2151
ATP5D	0		0	-1.06057	0.571945	0.697897	9.0258	9.0936		0	0.592193	0.172787	0.165437	5.0827	5.00482		0	-1.5751	0.708301	0.90896	10.0769	10.4513
ATP5E	0		0	-1.70899	0.273738	0.227814	13.2243	13.4097		0	-1.45115	0.075507	0.0984038	8.18447	8.39053		0	-3.50995	0.2385	0.74016	11.5042	12.2196
ATP5F1	0		0	0.297234	0.189552	0.273217	12.606	12.6294		0	1.13202	0.171187	0.0851672	6.11211	6.07302		0	-0.972651	0.205964	0.188858	11.1556	11.1679
ATP5G1	0		0	2.69442	0.373107	0.558595	8.69442	8.31192		0	1.92935	0.16529	0.512269	6.32438	5.67718		0	-0.998357	0.23995	0.719161	9.8869	9.8583
ATP5G2	0		0	-1.46221	0.140004	0.338525	11.467	11.5995		0	2.3902	0.151906	0.126359	7.28118	6.8852		0	-1.6763	0.335617	0.405056	11.7342	12.1259
ATP5G3	0		0	1.5107	0.381149	0.422663	11.341	11.1057		0	1.54742	0.18621	0.351574	5.02214	4.57287		0	-1.04878	0.180185	0.334232	11.3538	11.3502
ATP5H	0		0	0.687664	0.302529	0.159787	12.3019	12.3633		0	1.8174	0.18242	0.202116	7.34506	7.04298		0	-0.252085	0.239864	0.522775	11.1381	11.0292
ATP5I	0		0	1.54021	0.292222	0.361332	11.9734	11.6742		0	1.23294	0.136274	0.162026	8.0423	7.66551		0	-0.623221	0.344682	1.42363	10.3496	10.3842
ATP5J	0		1.09487	4.80139	0.157118	0.304668	12.5153	12.0656		0	2.96753	0.125941	0.162287	6.10439	5.82425		0	0.181335	0.162786	0.381253	10.9684	10.9118
ATP5J2	0		0.628345	-4.5429	0.247028	0.252904	10.9944	11.465		0	-2.1054	0.165453	0.249863	6.64026	6.95071		0	-4.32841	0.282623	0.673625	10.119	10.9757
ATP5L	0		0	0.409327	0.397739	0.227165	12.164	12.1698		0	1.68106	0.232853	0.268283	6.06233	5.5434		0	-0.292612	0.243092	0.283836	11.1855	11.1647
ATP5O	0		0.940682	4.71352	0.163481	0.235995	12.449	11.9536		0	4.2868	0.124945	0.21864	7.4225	6.64637		0	1.00543	0.258503	0.333831	11.6932	11.5206
ATP5S	0		0	2.00971	0.601706	0.44591	7.76652	7.54062		0	4.17928	0.147813	0.197131	3.57411	2.88879		0	0.994204	0.376554	0.439937	6.5341	6.16875
ATP5SL	0		0	0.185454	0.538091	0.203918	9.28276	9.2991		0	1.45121	0.226166	0.0888321	4.20837	3.88628		0	-1.60641	0.189126	0.31752	9.7165	10.0009
ATP6AP1	0		0	-4.06004	0.392739	0.423742	9.00815	9.5818		0	-4.18684	0.104265	0.202412	5.24185	5.68526		0	-4.43748	0.127376	0.367259	11.4296	11.9589
ATP6AP1L	1		2.77476	5.79712	1.83641	1.52807	7.74316	6.45077		0	0.160296	0.171726	0.268636	2.28189	2.32976		0	3.5534	0.372675	0.713802	6.2222	5.56975
ATP6AP2	0		0	-0.708019	0.301221	0.458005	13.0411	13.1319		0	-1.59093	0.152934	0.158022	6.56387	6.87147		0	-1.44001	0.183335	0.465321	12.0088	12.3415
ATP6V0A1	0		0	0.672417	0.407007	0.472852	6.34089	6.36464		0	0.268296	0.172195	0.254512	4.1961	4.30488		0	1.92101	0.101068	0.618789	10.5738	10.1024
ATP6V0A2	0		1.81269	-5.25971	0.816893	0.682155	4.24127	5.03297		0	-3.74028	0.0739112	0.114325	3.12056	3.39522		0	-3.98273	0.184969	0.24467	8.4997	8.93965
ATP6V0A4	0		0	-0.017143	3.58599e-05	3.9635e-05	2.09823	2.09902		0	-0.591464	0.000910934	0.0117735	0	0		0	-1.84058	0.441737	1.36097	0	0
ATP6V0B	0		0.814178	-4.64788	0.22844	0.653369	9.84342	10.6889		0	-3.41584	0.210658	0.192951	5.84326	6.2153		0	-2.60315	0.258554	1.02004	10.7753	11.2446
ATP6V0C	0		1.00532	-4.7997	0.302517	0.226665	9.98404	10.5344		0	-2.14734	0.148818	0.182503	4.85533	5.23103		0	-3.43469	0.152997	0.403489	11.1283	11.4758
ATP6V0D1	0		0	-3.88808	0.395629	0.682264	9.21904	9.87231		0	-2.8721	0.16762	0.477397	4.97898	5.32095		0	-3.74321	0.284514	0.30416	10.4337	10.9823
ATP6V0D2	0		0	-2.19481	5.7384e-05	2.60343	2.2016	2.20864		0	-3.22027	0.0474361	1.55665	0.548241	1.65871		0	-4.6238	2.37375	8.22252	0.9042	4.57405
ATP6V0E1	0		0	-0.154057	0.153312	0.260607	11.9455	12.009		0	-1.57326	0.0720298	0.211722	6.78007	7.08011		0	-2.03074	0.184365	0.408482	11.3864	11.6235
ATP6V0E2	1		3.37031	6.06505	1.4174	1.67212	7.55626	6.10467		0	3.26189	0.138009	0.97601	4.10487	3.2952		0.379104	4.98327	0.381112	1.61093	10.1865	8.84295
ATP6V1A	1		2.33895	-5.5126	0.454754	0.550135	9.68798	10.6818		0.21915	-5.42782	0.0967254	0.384325	4.4497	5.46947		1.52757	-5.93123	0.277596	0.242983	9.6952	10.5106
ATP6V1B1	0		0	-1.79354	0.00943741	0.0306799	2.87504	2.89302		0	-1.14182	0.244873	0.25856	0.769892	0.947489		0	-2.39605	2.27143	1.78486	4.4413	5.31825
ATP6V1B2	0		0	-0.14257	0.612673	0.537046	9.33879	9.38254		0	-3.41227	0.378531	0.285648	5.23186	5.8327		0	-0.952001	0.20778	0.42611	11.0908	11.0564
ATP6V1C1	0		0	-0.133862	0.44496	0.399748	8.91389	8.87215		0	-1.69984	0.132708	0.468549	4.28272	4.53426		0	0.307623	0.155881	0.180673	10.3353	10.169
ATP6V1C2	0		0	-1.24477	0.00191084	0.0605928	2.74083	2.75837		0	-1.47027	0.24651	0.229467	3.8998	4.0622		0.430506	-5.02602	0.258808	0.3555	6.1804	6.8158
ATP6V1D	0		0	2.30064	0.237879	0.40927	9.8817	9.66417		0	1.42693	0.100368	0.452995	5.06181	4.84029		0	-1.40418	0.208404	0.241741	10.1462	10.1786
ATP6V1E1	0		1.65563	5.17311	0.272128	0.220936	10.9774	10.4747		0	2.67413	0.147527	0.367858	6.37038	5.76708		0	2.26684	0.228714	0.295475	11.6665	11.2655
ATP6V1F	0		0	-3.38852	0.420242	0.249997	10.0499	10.5778		0	-3.34433	0.129361	0.266062	5.76711	6.24802		0	-4.10969	0.267075	0.468878	10.4537	10.8832
ATP6V1G1	0		0	-3.71671	0.326932	0.249946	10.5068	10.9745		0	-2.53727	0.114831	0.152726	5.48234	5.7412		2.04845	-6.36305	0.140483	0.123186	10.4003	11.0236
ATP6V1G2	0		0	0.483141	0.579946	0.352183	1.96885	1.96698		0	1.4825	0.56098	0.292473	1.02402	0.740726		0	1.68374	1.58121	2.9495	5.4033	4.6411
ATP6V1G3	0		0	-1.96179	0.000483528	0.029249	2.59677	2.61263		0	-3.13825	0.00139365	0.0519181	0	0.16137		0	-2.81941	0.035034	1.0826	0	0.2347
ATP6V1H	0		1.03575	4.78243	0.324021	0.359171	9.48681	8.95569		0	0.779963	0.134896	0.384622	4.87905	4.53811		0	3.23229	0.17324	0.151639	10.353	9.86285
ATP7A	0		0	3.17778	0.70041	0.77555	8.036	7.70607		0	0.395296	0.124445	0.244852	3.39623	3.28554		0	0.154331	0.336752	0.402796	8.7009	8.6331
ATP7B	0		0	-0.706288	0.00992553	0.0332658	1.88216	1.88289		0	-3.3573	0.073381	0.189042	0.597496	1.16167		0.0609842	-4.71906	1.3102	1.07256	4.941	6.35015
ATP8A1	0		0	0.211058	2.01543	1.65895	3.04394	3.23262		0	1.82547	1.18934	0.738926	2.58205	2.08669		0	1.7877	2.81307	3.78847	7.7216	6.1603
ATP8A2	0		0	-2.55286	0.000108503	1.26392	2.30847	2.31708		0	-0.333385	0.177655	0.390197	0.31076	0.23807		0	-2.41312	4.0923	2.32785	1.9202	4.13555
ATP8B1	0		0	1.62308	0.389198	0.453851	9.11312	9.06904		0	3.55477	0.41687	0.415159	3.91429	2.75614		3.4603	7.56013	0.790687	1.11413	9.769	7.8665
ATP8B2	0		0	1.53141	0.479143	0.603198	8.99675	8.62923		0	1.85384	0.15682	0.259479	5.58402	5.24735		0.145159	4.78935	0.222303	0.592197	11.8229	11.0357
ATP8B3	0		0	1.50123	0.52161	0.565261	2.80028	2.76708		0	3.38258	0.240546	0.129598	1.19897	0.6403		0	4.09984	0.898847	0.860344	7.5135	6.47535
ATP8B4	0		0.680698	4.68229	5.45885	2.05343	5.39837	2.76234		0	4.2645	1.48604	0.43207	3.92136	2.69109		3.42051	7.5257	2.88771	1.27292	9.3485	6.4988
ATP9A	1		4.23515	6.66903	0.464252	3.16478	9.60377	8.22549		0	1.97394	0.25245	1.6378	4.87983	4.49628		0	3.88793	0.43347	3.63346	11.2751	9.95155
ATP9B	0		0	0.46005	0.964985	0.591811	5.06606	5.05773		0	1.33416	0.171672	0.205665	3.68516	3.22295		0	3.31191	0.179527	0.529764	8.762	8.1124
ATPAF1	1		7.67296	8.23979	0.241589	0.784513	9.48013	8.48681		0.250839	5.46231	0.0843827	0.191859	5.23335	4.30828		0.456701	5.04788	0.142686	0.500176	10.7318	9.99395
ATPAF2	0		0	1.36222	2.77555	1.22136	5.61973	5.42026		0	-0.213415	0.698334	0.393561	3.16015	3.21851		0	-0.457731	0.575091	0.526514	8.4507	8.3854
ATPIF1	0		0	0.533639	0.362928	0.423495	9.74857	9.75007		0	-0.418568	0.267931	0.147339	5.91683	5.92294		0	-2.26984	0.275513	0.676372	10.2783	10.4868
ATR	0		0	0.0739252	0.201251	0.295448	8.70334	8.6907		0	-0.965725	0.0471569	0.196529	3.9322	3.81697		0	0.398514	0.140617	0.525449	8.834	9.0267
ATRIP	0		0	0.590481	0.192486	0.211341	3.03281	3.02423		0	1.66723	0.0880135	0.131209	3.03847	2.70308		0	1.69996	0.148572	0.286644	8.2428	8.0385
ATRN	0		0.909862	-4.75548	0.602584	0.399221	7.14886	7.77595		0	-4.33638	0.0471315	0.208628	4.09402	4.78851		0	-3.60836	0.211325	0.398543	10.021	10.5696
ATRNL1	0		0	-0.351398	0.836354	1.43913	2.52105	2.53161		0	-0.719206	2.21024	1.95732	2.19961	2.56417		0	0.513589	9.46123	4.44426	4.7657	4.7184
ATRX	0		0	2.92492	0.802476	1.97069	9.54941	9.02681		0	0.963567	0.354154	0.280082	4.84618	4.6117		0	1.7954	0.775317	1.3238	10.5565	10.211
ATXN1	0		0	-1.57252	0.494597	0.645367	9.10127	9.24377		0	-1.97237	0.183435	0.341771	3.91893	4.31203		0	-1.75082	0.387582	0.41048	9.884	10.2866
ATXN10	0		0.383025	-4.40925	0.271911	0.21845	10.6431	10.9507		0	-2.84857	0.158587	0.0493482	4.87285	5.09557		0	-4.25124	0.126186	0.185132	10.7005	11.1398
ATXN1L	0		0	-0.835163	0.336075	0.422338	9.00914	9.03324		0	0.0864764	0.170519	0.153168	3.48841	3.4263		0	1.39382	0.30255	0.711663	9.8557	9.76475
ATXN2	0		0	4.07064	0.227316	0.256933	7.98469	7.42697		0	1.92788	0.0905373	0.0830442	4.08649	3.91285		0	2.57141	0.171842	0.346998	9.9358	9.50925
ATXN2L	0		0	0.165384	0.665751	0.366444	5.3933	5.32816		0	-2.17852	0.21088	0.0906972	4.14423	4.3981		0	1.053	0.137817	0.295085	11.5567	11.3054
ATXN3	0		1.69218	5.14209	0.264523	0.426718	8.18729	7.70249		0.631891	5.88088	0.0709855	0.0875057	4.07174	3.34758		0	2.22543	0.238585	0.321619	9.1464	8.6888
ATXN3L	0		0	-0.455846	0.000145545	0.000130968	2.34245	2.34552		0	-2.37082	0.0112627	0.144054	0.025496	0.18143		0	0.0887335	0.0216769	0.0122409	0	0
ATXN7	0		0	2.53817	0.239777	0.291627	9.56261	9.30886		0	1.62799	0.0662945	0.0784579	3.91215	3.65524		0	2.0638	0.208599	0.605725	9.1332	8.92675
ATXN7L1	0		0	-0.374897	0.342779	0.29667	2.74311	2.79532		0	-0.559033	0.159306	0.16769	2.85318	2.78353		0	0.865689	0.16588	0.543098	7.291	7.1299
ATXN7L2	0		0	-1.56872	0.000108545	7.92012e-05	2.18832	2.19261		0.104811	-5.30395	0.0746033	0.159638	1.24762	1.83174		0	-4.55863	0.561217	0.631431	6.0372	6.7368
ATXN7L3	0		0	-3.22213	0.29542	0.388479	6.27594	6.69276		0	-3.55843	0.126159	0.0950858	3.87904	4.26088		0	-3.14663	0.115795	0.397294	10.1047	10.5748
ATXN7L3B	0		0.14632	-4.2439	0.289472	0.289217	8.43467	8.80389		0	-1.20931	0.105048	0.112343	4.85335	5.04012		0	-2.02724	0.157515	0.431955	10.6024	10.801
AUH	0		0	-3.49469	0.567221	0.625137	8.00517	8.49606		0	-1.23807	0.113488	0.665248	3.48529	3.7767		0	0.187323	0.326952	0.50641	7.1665	7.1969
AUP1	1		4.39377	-6.63454	0.347094	0.321769	8.94319	9.66812		0	-3.96356	0.124844	0.221854	5.24318	5.98382		2.72011	-6.92677	0.290017	0.209458	10.6055	11.3626
AURKA	0		0	2.11768	1.03195	2.97246	8.6882	8.27985		0	-0.993919	0.584711	0.412542	3.87548	3.99025		0	-2.02247	0.72055	0.854672	8.7147	9.12065
AURKAIP1	0		0.281254	-4.32607	0.444448	0.471845	9.48469	10.2559		0	-4.33446	0.207913	0.243374	5.01062	5.96142		0.439928	-5.03386	0.324961	0.955077	9.9807	10.9527
AURKB	0		0	-0.914295	3.19425	1.96769	5.58802	6.05237		0	-2.74186	1.60241	1.29232	3.13578	4.08686		0	-4.54766	2.44031	1.55408	7.5623	9.25665
AURKC	0		0	-3.01256	0.0259184	0.217834	2.5537	2.57775		0	-3.18872	0.0685845	0.153043	0.515454	1.10436		0	-4.0405	1.21857	0.815399	3.0188	4.1455
AUTS2	0		0	-1.76163	1.30133	1.42649	9.77826	10.5401		0	-1.76153	0.157809	1.46699	3.50758	4.55837		0	-0.335287	0.62284	1.27492	10.07	9.9342
AVEN	0		0	-0.677127	1.00147	0.719814	7.67992	7.67071		0	0.581026	0.499493	0.11499	3.7513	3.62635		0	-2.51391	0.529756	0.858452	8.2891	8.8924
AVIL	0		0	-2.95276	0.631598	0.837647	6.62202	7.10183		0	-2.7519	0.222224	0.663804	2.03745	2.40129		0	-0.320169	1.55848	3.58906	5.0956	5.0832
AVL9	0		0	-1.89458	0.260969	0.381915	7.96142	8.09305		0	-3.13475	0.0962097	0.0997825	3.92421	4.17454		0	-1.10507	0.516582	0.65805	7.6201	7.56005
AVP	0		0	-0.196017	0.000113033	0.000404764	1.86353	1.86101		0	-0.900369	0.00399916	0.0328836	0	0		0	-1.20228	0.00519064	0.0515738	0	0
AVPI1	0		0	-1.19087	1.11379	0.93046	5.95223	6.04112		0	-0.595767	0.416416	0.348905	2.84121	2.99858		0	-0.43918	0.79318	1.28902	7.9406	8.03205
AVPR1A	0		0	-1.92684	3.05504	2.48842	2.7676	3.83656		1.82716	-7.26181	0.105616	0.292666	0.720121	2.05995		0	-2.92365	2.3074	2.5321	2.9181	4.25995
AVPR1B	0		0	-0.315729	0.00544306	0.0102409	2.13965	2.14444		0	0.0916205	0.00141801	0.000870651	0	0		0	-1.14897	0.19544	0.516138	0	0
AVPR2	0		0	0.64755	0.790775	0.831028	2.91409	2.9494		0	-0.512213	0.144889	0.0824556	0.668345	0.813669		0	0.34709	1.34485	5.82855	4.6605	3.6913
AWAT1	0		0	1.48679	0.00198242	0.000104968	2.36195	2.36125		0	0.976195	0.0667267	0.124467	0.556704	0.421524		0	-0.931528	0.0205348	0.682033	0	0
AXIN1	0		0	0.00495354	0.222401	0.166607	2.81672	2.85871		0	0.237911	0.127642	0.198847	3.41989	3.1523		0	2.19019	0.11567	0.184602	9.9637	9.68305
AXIN2	0		0	-0.127016	1.79082	1.55155	6.38219	6.48066		0	-0.136242	0.832089	0.371061	3.33981	2.99568		0.143281	4.78779	0.640599	1.57802	8.7618	7.46435
AXL	0		0	0.585448	0.918706	2.1059	10.1014	10.0821		0	0.806997	0.258035	1.79581	5.65919	5.12186		0	0.737842	0.435529	2.65774	12.1837	11.9483
AZGP1	0		0	-0.664469	0.151809	0.153569	3.56843	3.6292		0	-0.74432	0.0361733	0.383075	0.0454102	0		0	-0.522805	2.06588	3.48627	0.8972	0.9697
AZI2	0		0	-3.13688	0.312588	0.324366	7.50548	7.80533		0	0.329336	0.0750266	0.14481	4.39059	4.40819		0	-0.352229	0.120941	0.281965	9.7102	9.9014
AZIN1	0		0	-1.82063	0.346943	0.582156	9.98206	10.1082		0	-0.828721	0.135282	0.103906	5.80871	5.87774		0	-1.32026	0.182848	0.252915	11.4248	11.6966
AZU1	0		0	-1.31097	0.000101001	0.000545057	2.30211	2.30174		0	-1.38258	0.00640312	0.0117697	0	0.1131		0	-0.414004	0.592171	1.174	1.0117	0.87975
B2M	0		0	2.96801	0.12158	0.253393	14.9704	14.8073		0	0.695508	0.212122	0.253801	10.0912	9.87776		0	0.206464	0.507317	1.26327	15.6927	15.3855
B3GALNT1	0		0.87827	-4.6871	1.90614	2.1676	5.62625	7.05886		0	-4.06913	0.555191	0.212163	3.12741	3.91527		0	-1.28645	0.900303	2.66113	7.7137	8.6878
B3GALNT2	1		7.98959	8.29848	0.512633	0.932421	9.67416	8.11577		5.1973	12.0516	0.143024	0.0963851	4.92789	3.58753		3.74702	7.80984	0.3427	0.437951	10.2271	8.7255
B3GALT1	0		0	0.533666	1.51139e-05	2.07881e-05	2.11034	2.10974		0	2.28233	0.637289	0.316277	1.19702	0.701041		0	1.40186	3.18152	3.33609	3.7337	2.3477
B3GALT2	0		0	0.652294	1.27558	1.21896	2.84512	2.83639		0	3.36235	0.322515	0.0537395	2.4178	2.19299		0	1.71377	6.06157	7.22443	3.3479	2.12535
B3GALT4	0		0	3.80241	0.354006	0.280519	5.48582	5.10141		0	3.67463	0.238528	0.586799	3.18109	2.53768		0.452636	5.04448	0.261057	0.603262	8.1182	7.0663
B3GALT5	0		0	1.17021	0.0030257	5.67675e-05	2.12177	2.12022		0.54038	5.77959	0.895616	0.0625549	1.63958	0.263574		0.149806	4.79316	5.84777	2.40342	4.2077	0.57875
B3GALT6	1		2.59567	-5.70206	1.14831	0.937274	6.6454	7.8263		2.20416	-7.72452	0.168782	0.140208	2.46365	3.70882		4.86727	-8.8139	0.314562	0.592214	8.365	10.1485
B3GAT1	0		0	0.614389	0.583272	0.262161	2.10337	2.10265		0	1.43884	0.706015	0.0914384	0.175523	0.122518		0	-0.557871	3.64172	5.26036	3.2001	3.20625
B3GAT2	1		5.08013	7.47524	5.11987	1.27738	6.09254	2.71798		0.502727	5.73809	1.10367	0.0104647	1.20965	0		2.71369	6.92132	5.13188	1.44413	6.3079	2.7896
B3GAT3	0		0	-2.7045	0.241583	0.376691	5.32035	5.67188		0	-1.73929	0.168805	0.205203	4.21556	4.43691		0	-2.55303	0.239023	0.634336	9.7383	10.0289
B3GNT2	0		0	-1.09897	0.892835	1.1102	8.24714	8.82228		0	-4.50109	0.348753	0.319653	3.48031	4.35643		0	-1.59306	0.482338	0.60413	8.3813	8.80555
B3GNT3	0		0	1.70084	0.0432061	0.00140513	2.24092	2.24264		0	-0.357628	0.0142226	0.00780837	0.151536	0.170767		0	-2.79835	0.837524	2.73211	0.5726	1.7393
B3GNT4	0		0	-0.292671	0.182029	0.131227	3.7695	3.79616		0	-0.038203	0.0621164	0.0719214	0.917551	0.886872		0	-2.77601	1.15159	3.815	1.1334	2.53795
B3GNT5	0		1.5617	-5.08327	3.00518	3.49839	5.28021	7.81956		0	-4.54674	0.29972	0.465898	2.14482	3.26124		0	-2.74993	1.16993	1.40948	6.8529	7.98565
B3GNT6	0		0	-3.06341	0.00911409	0.0254537	3.30841	3.36429		0	-0.983373	0.0282693	0.0477077	1.00895	0.982764		0	-1.47973	0.0915155	0.315668	0	0
B3GNT7	0		0	-3.8681	0.393238	0.665326	5.1454	5.40451		0	-2.7441	0.31355	0.355474	1.23508	1.97498		1.64627	-6.0293	1.65806	0.817853	5.2679	7.2586
B3GNT8	0		0	1.73407	0.17946	0.0203274	2.64026	2.61567		0	2.50055	0.141759	0.177035	1.84507	1.46089		0	1.96063	0.676894	1.02411	6.3796	5.98725
B3GNT9	0		0	-3.56318	0.701927	1.25902	6.36781	7.18988		0	-2.26174	0.251814	0.65429	3.94328	4.33158		0	-1.94967	0.357476	0.896137	9.2968	9.64225
B3GNTL1	0		0	-2.14528	0.0522715	0.267476	2.75272	2.77777		0	-3.73716	0.134588	0.157253	1.15419	1.77864		2.98838	-7.15445	0.422155	0.380663	5.4122	6.6185
B4GALNT1	0		0	3.01811	1.38813	1.49017	3.34361	2.35504		0	4.52478	0.553347	1.8464	4.24598	2.35278		0	3.44876	0.801676	6.89009	9.895	7.8266
B4GALNT2	0		0	0.122489	7.78603e-05	9.07288e-05	2.20853	2.20907		0	0.485301	0.000360516	0.00032055	0	0		0	-0.370101	0.218427	0.143862	0	0
B4GALNT3	0		0	-1.59692	0.187372	0.498382	3.54893	3.58924		0	-0.184974	0.527155	0.148363	0.361533	0.674767		0	-1.27279	5.10908	6.57125	4.5048	5.6595
B4GALNT4	0		0	-1.39065	0.000136157	0.0010725	2.30008	2.30174		0	0.322697	1.6686	1.69775	0.722102	0.16545		0	0.884187	10.6661	11.1708	6.6377	3.36695
B4GALT1	0		0	-1.99829	0.647713	0.561709	7.23042	7.43737		0	-4.73254	0.366198	0.508725	4.47785	5.51307		0	-2.20525	0.299723	0.5965	11.3688	11.6766
B4GALT2	0		0	-2.8164	0.569858	0.527344	6.39788	6.68963		0	-1.62907	0.194559	0.467348	4.89956	5.20313		0	-1.54178	0.228773	0.923607	10.6046	11.1756
B4GALT3	1		10.3958	-9.55907	0.194351	0.633636	6.27283	7.59714		2.85797	-8.56412	0.0710851	0.0426368	3.33943	3.92625		4.46541	-8.4479	0.125203	0.276577	8.8777	10.006
B4GALT4	0		0	3.37368	0.269753	0.283484	8.16416	7.76068		0	1.8431	0.161848	0.165847	4.17399	3.76139		0	1.1367	0.238093	0.474345	9.629	9.53825
B4GALT5	0		0	-2.62206	0.507472	0.425666	8.88511	9.39251		0	-3.7294	0.116278	0.203493	4.29458	4.94326		0	-1.92985	0.435998	0.393185	10.5216	11.1126
B4GALT6	1		2.278	-5.50298	0.627256	2.22629	2.82529	4.4371		0	-2.49885	0.331037	0.893816	0.483571	1.99557		0	-2.41693	3.47002	5.84569	4.0854	6.31455
B4GALT7	0		0	-2.01788	0.286745	0.382573	6.66785	6.94694		0	-3.85822	0.109453	0.197317	3.66435	4.29369		0.109188	-4.75914	0.156708	0.385907	9.2009	9.79385
B9D1	0		0	1.50193	1.65242	1.3447	4.31695	3.83692		0	0.787659	0.666208	2.02398	3.51366	3.37366		0	0.270947	1.25462	0.807678	7.4187	7.11755
B9D2	0		0	0.28768	0.115863	0.130245	2.23049	2.23002		0	-3.47379	0.13713	0.220947	1.70508	2.34196		0	-4.4374	0.265715	0.859566	5.9354	6.96815
BAALC	0		0	2.5601	6.14708	4.27941	4.73251	2.22979		0	0.695069	2.16316	1.20491	3.62617	3.21936		0	2.65701	5.66781	6.33946	8.4573	6.9175
BAAT	0		0	0.647704	0.00270921	0.000511137	2.314	2.31537		0	0.609782	0.121325	0.013855	0.377007	0.374677		0	-0.696063	2.65636	2.31174	1.6581	2.07715
BACE2	0		0.627709	4.52375	1.20219	2.15075	9.49368	8.59576		0	0.884446	0.694731	0.929192	3.62912	3.41367		0	2.6174	0.784691	1.57074	10.5243	10.1662
BACH1	0		0	-2.607	0.374112	0.705221	8.29137	8.6559		0	-4.66392	0.119536	0.174607	4.65216	5.3592		0	-2.10369	0.363245	0.35594	9.6724	10.0884
BACH2	1		5.19145	-6.96821	0.575631	1.31859	4.51573	5.6812		0.415245	-5.64198	0.157054	0.993188	0.690876	2.85591		0	-4.59423	2.53585	2.43533	5.521	7.5423
BAD	0		0	2.8531	0.351945	0.473788	6.58057	6.2379		0	1.43582	0.0962096	0.252243	5.35176	5.01867		0	0.124667	0.244321	0.712327	10.2926	10.2137
BAG1	0		1.86123	5.28299	0.587736	0.507992	8.44537	7.52701		0	4.14646	0.237926	0.174771	3.83667	3.21201		0	3.36918	0.396683	0.181036	10.3958	9.7061
BAG2	1		5.19914	6.96098	0.884826	1.62838	10.4006	8.8896		1.43662	6.7975	0.324445	0.25577	5.796	4.50021		2.78908	6.98513	0.529432	0.951581	10.8495	9.0293
BAG3	0		0	-1.22734	0.752104	0.933287	8.97136	9.23641		0	1.01453	0.284228	0.361616	3.56915	3.35036		0	-2.1407	0.354185	0.727331	10.4128	10.7979
BAG4	0		0	-1.18558	0.37055	0.671129	9.26116	9.2239		0	0.180691	0.221694	0.173951	3.73935	3.71685		0	-0.129603	0.601941	0.980597	7.1898	7.13905
BAG5	0		0	2.93352	0.199717	0.377338	9.44783	9.10778		0	1.60406	0.100615	0.272911	4.62916	4.39228		0	2.78317	0.23388	0.155439	10.3671	10.1372
BAGE	0		0	-0.259212	0.516061	0.350839	2.83085	2.84413		0	-0.566876	0.070174	0.179867	1.12203	1.13912		0	-1.88507	0.0219126	4.12187	0	0
BAHCC1	0		0	-0.0247343	1.36413	1.03289	5.03469	5.06981		0	1.65768	0.315292	0.275753	2.26289	1.95784		0	3.88306	0.547603	2.40901	9.9777	8.5798
BAHD1	0		0	0.679572	0.514827	0.367941	6.8282	6.80316		0	-0.497539	0.19278	0.238042	3.13999	3.33217		0	3.29421	0.212846	0.638044	9.9428	9.3459
BAIAP2	0		0.634727	-4.59106	0.107906	0.680466	3.22848	3.36815		0	-1.28676	0.674933	0.612976	2.35201	2.75714		0.139565	-4.78465	1.67491	1.11104	8.0179	9.8606
BAIAP2L1	0		0	-2.86066	2.71363	6.42207	2.97045	3.51864		0	-2.58014	0.395836	1.36936	1.58982	2.64144		0	-0.852129	3.47333	5.94963	5.707	6.4315
BAIAP2L2	0		0	0.687236	0.160155	0.103158	3.11994	3.12459		0	0.291001	0.259659	0.355319	0.951762	0.787218		0	2.00263	2.48729	2.43202	4.721	3.66385
BAIAP3	0		0	-0.737543	0.0553154	0.17323	2.98183	3.00613		0	0.132525	0.0223765	0.014826	0.34882	0.364846		0	-3.60013	1.38098	3.26474	3.8025	4.8822
BAK1	0		0	-2.07085	0.270559	0.349676	5.32594	5.541		0	-4.36757	0.127086	0.116187	3.3512	3.8824		0.312288	-4.92796	0.301869	0.500859	8.3659	9.3885
BAMBI	0		0	-2.60473	5.03858	5.66417	4.19294	5.94371		0	-1.46198	1.51025	1.78564	1.64003	2.16998		0	-3.723	5.73128	4.73044	4.8316	7.48935
BANF1	0		0	-0.685758	0.203128	0.304107	10.2876	10.2922		0	-0.130127	0.107794	0.250932	5.34866	5.35149		0	-2.32536	0.181219	0.555973	11.3115	11.511
BANF2	0		0	-1.21262	0.000261865	0.000370417	2.32102	2.32277		0	-0.939035	0.0216357	0.872932	0	0		0	2.66533	0.318704	0	0	0
BANK1	0		0	0.240723	1.46745	0.969006	2.50808	2.51234		0	-2.25729	0.314624	0.477102	0.376879	1.1788		0	0.237069	4.25504	5.00941	3.7317	3.8174
BANP	0		0	-1.56852	0.356872	0.321869	8.27841	8.45382		0	-1.00612	0.0592811	0.167429	3.55051	3.7419		0	0.142416	0.188869	0.221622	8.3582	8.44325
BAP1	0		0	-1.13574	0.162467	0.307561	6.82861	6.97506		0	0.65451	0.0927594	0.14575	4.54559	4.38542		0	0.825249	0.0829402	0.208678	11.2867	11.1594
BARD1	1		16.5111	12.5296	0.720278	0.770717	10.2949	7.80048		1.42105	6.77925	0.202271	0.546498	5.12978	3.28005		1.5868	5.98034	1.06161	2.83233	8.1501	6.07375
BARHL1	0		0	0.372215	0.0118173	0.0223881	2.33292	2.33183		0	-1.96803	0.0154392	0.0262877	0.0693604	0.145331		0	-1.81418	0.00834494	0.0879673	0	0
BARX1	0		0	-1.19123	0.0814427	0.503132	2.42522	2.42501		0	0.0404939	0.927871	1.08787	0.178036	0.125511		0	-0.98329	3.85821	10.6137	2.3242	3.00785
BARX2	0		0	-1.59337	0.00340648	0.0146558	3.38819	3.43488		0	-2.49622	0.00744894	0.025063	0.10089	0.197841		0	-3.77961	0.313514	0.783992	0	1.24105
BASP1	0		0	-1.59629	10.6807	4.89926	10.7426	10.8909		0	-2.09113	2.46152	2.36248	4.62803	5.11059		0	-1.68845	4.12344	4.00453	10.255	11.1052
BATF	0		0	-1.93503	0.529177	0.423062	4.11081	4.39451		0	-2.19123	0.358098	0.523286	0.958342	1.68741		0	-2.21776	2.45005	3.96577	5.2425	6.0728
BATF2	0		0	0.501332	2.69923	1.31001	3.42643	3.47582		0	0.315262	0.651612	1.55428	1.44838	1.10918		0	1.00397	2.45135	5.27897	6.9823	6.8546
BATF3	1		2.6837	5.96189	1.17875	0.366587	6.00203	4.98942		0	1.74483	0.715663	0.894822	2.60213	1.6218		0	2.95212	0.95838	0.889447	7.1788	6.20765
BAX	0		0	-2.23438	0.680118	0.652822	6.14876	6.55402		0	-2.75527	0.26377	0.112135	4.52725	5.0782		1.28733	-5.73315	0.271942	0.369339	9.5292	10.4523
BAZ1A	0		0	0.132208	0.363552	0.567198	8.8326	8.92886		0	0.171225	0.175646	0.261701	3.97961	4.0861		0	0.137458	0.418019	0.532087	9.7085	9.7185
BAZ1B	0		0	1.41788	0.335663	0.33665	8.94359	8.79165		0	-0.372851	0.06606	0.271298	5.13569	5.28378		0	2.0485	0.161042	0.237197	11.5308	11.1433
BAZ2A	0		0	-1.37909	0.366008	0.334596	7.82061	8.08732		0	-0.970585	0.147792	0.0496556	3.85418	3.87378		0	0.551439	0.24833	0.541046	10.8066	10.7644
BAZ2B	0		0	-1.80288	1.26073	0.873837	7.53549	7.72242		0	0.448285	0.383979	0.116001	3.78127	3.80338		0	1.32166	0.637033	1.19833	8.8116	8.2374
BBC3	0		0	-0.246659	0.710188	0.65049	5.41706	5.51323		0	3.39032	0.383273	0.0655579	2.61885	2.00197		0	-1.18664	0.465386	0.917084	7.6515	7.9643
BBOX1	0		0	0.978121	2.70776	1.78137	2.46318	2.46612		0.351194	-5.57181	0.779164	0.459092	0.761781	2.58069		0	2.73135	4.51055	5.69596	4.6714	2.3578
BBS1	0		0	3.71814	0.749301	0.658933	8.20215	7.45834		0	2.10094	0.286229	0.329003	3.79084	3.36607		1.47595	5.88852	0.392132	0.744208	9.8458	8.7618
BBS10	0		0	1.30985	0.266699	0.287322	7.37516	7.20137		0	2.85295	0.119075	0.157446	3.69099	3.26704		0	-0.277091	0.188897	3.45109	8.7226	8.6244
BBS12	0		0	-2.89167	0.593078	0.703295	3.21875	3.67957		0	-3.51681	0.238829	0.0706532	1.61812	1.96956		0	-2.60493	0.416813	0.377622	6.2744	6.91025
BBS2	0		0	-2.15215	0.82194	0.555611	7.24454	7.36512		0	-0.548218	0.359324	0.526899	3.82108	3.75411		0	0.729336	0.369464	0.271954	9.144	9.01075
BBS4	0		0	-0.49163	0.626688	0.347071	7.24818	7.37235		0	-0.738436	0.088427	0.126278	3.39117	3.4801		0	1.03417	0.131768	0.467397	8.6666	8.575
BBS5	0		0	-1.34671	0.0305911	0.0530449	2.69449	2.70042		0	-1.95107	0.0427271	0.0422449	4.7504	4.91663		0	0.679045	0.256057	0.67732	7.8024	7.79145
BBS7	0		0.868475	4.71942	0.839826	0.611831	7.79283	6.91498		0	2.12588	0.0924272	0.210782	3.73821	3.33936		0	3.85974	0.15354	0.15548	8.7403	8.28335
BBS9	1		6.9868	-7.82491	0.303954	0.584142	5.95519	6.88157		0	-3.95662	0.259381	0.289111	3.12534	3.92267		0	-2.34381	0.241891	0.511297	7.7689	8.24895
BBX	0		0	2.44482	0.278393	0.452177	9.75816	9.51918		0	2.44421	0.125215	0.175793	4.81689	4.36884		0	2.50712	0.283429	0.65209	10.6287	10.2094
BCAM	0		0	1.87813	0.435284	0.0874461	4.35383	4.36992		0	0.121878	0.604392	0.566748	2.64698	2.50922		0	0.319774	0.729258	1.44027	10.2275	10.0318
BCAN	0		0	-0.957579	0.207874	0.361217	3.56767	3.62638		0	3.56398	0.151958	0.0328954	0.740505	0.40199		0	3.16216	2.25069	7.4593	6.4621	3.2517
BCAP29	0		0	2.28923	0.313682	0.532679	9.70624	9.25564		0	-0.273889	0.0953492	0.169546	4.05162	3.99167		0	1.55751	0.160614	0.224035	10.5562	10.3117
BCAP31	0		0	-2.95276	0.263691	0.331366	10.0322	10.386		0	-2.48161	0.195484	0.119141	5.90643	6.17001		0	-2.41765	0.200806	0.611736	11.8202	12.2398
BCAR1	0		1.63283	-5.12068	0.215212	0.580437	6.25402	6.93703		0	-4.89116	0.285239	0.105816	3.87482	4.52843		0	-3.89115	0.243597	0.539561	10.5533	11.2673
BCAR3	0		0	-1.78029	1.31316	1.32706	7.1643	7.61832		0	-0.534111	0.254363	0.466768	3.52966	3.51811		0	-0.370596	0.534262	2.0672	9.1956	9.2811
BCAS1	0		0	-1.93508	0.0986392	0.815567	3.1579	3.22742		0	-1.20115	0.334971	0.436333	0.423549	0.659607		0	-1.6338	4.3814	4.51271	2.0275	3.4822
BCAS2	0		0	2.8424	0.0962351	0.376784	10.049	9.79764		0	1.17739	0.134427	0.0635252	4.92074	4.71758		0	0.156281	0.19695	0.261261	9.4998	9.5269
BCAS3	0		0	2.22122	0.679098	0.290551	5.47949	5.46757		0	1.57189	0.256119	0.132836	3.97178	3.59742		0	3.41185	0.272544	0.226807	9.131	8.74555
BCAS4	0		0	0.173717	0.904548	1.08026	4.45715	4.24109		0	0.630509	0.515835	0.9162	2.47781	2.34183		0	-2.23556	0.489048	1.27807	10.106	11.0885
BCAT1	0		0	-4.08988	5.66479	4.97846	8.59237	11.427		0	-3.88704	1.55016	1.02155	2.95399	4.88752		0	-4.49738	2.24557	1.80205	9.1622	11.2536
BCAT2	0		0	4.07686	0.81208	0.916501	6.53979	5.74369		0	1.01592	0.227079	0.156124	4.03639	3.91405		0	0.313654	0.328759	0.622044	9.2715	9.0193
BCCIP	0		0	-3.87715	0.896112	0.606212	7.72469	8.47267		0	-1.67936	0.170471	0.227704	4.2588	4.59947		0.609736	-5.17423	0.22524	0.268141	9.1965	9.80065
BCDIN3D	0		0	1.80356	0.27621	0.041631	3.3195	3.32846		0	1.35303	0.122689	0.0659701	2.3172	2.20564		0	2.26825	0.168041	0.374278	7.4391	7.0428
BCHE	1		12.1862	10.7649	8.16213	5.55747	10.7101	2.60792		2.71346	8.37439	0.893892	2.19442	6.4576	1.9826		1.01054	5.50504	6.36667	8.11289	11.2809	6.2568
BCKDHA	0		0	-0.951498	0.548436	0.464069	6.99756	7.16896		0	-1.36505	0.126523	0.222808	3.81261	3.88023		0	-2.46163	0.410331	0.621476	9.6991	9.7998
BCKDHB	0		0	2.5685	0.603829	0.592598	5.12004	4.38983		0	2.37093	0.159676	0.0804959	3.98873	3.52507		0	2.46818	0.521467	0.520531	8.2082	7.8236
BCKDK	0		0	-0.745068	0.795293	0.544705	6.19021	6.4679		0	0.36059	0.173315	0.170798	3.96953	3.87256		0	-1.60381	0.157246	0.298023	10.4822	10.5182
BCL10	1		3.96094	-6.34617	0.248806	0.504161	8.35012	9.16222		0	-4.34969	0.111539	0.20565	3.29408	4.01231		2.0821	-6.391	0.170806	0.311069	8.1735	9.19335
BCL11A	0		0	-1.7152	0.625375	2.2389	2.6872	2.71685		0	-0.518662	0.160186	0.181305	0.230816	0.298835		0	-3.16684	1.72506	5.66832	2.3181	3.3025
BCL11B	0		0	2.06387	4.38561	3.7859	5.14028	2.88715		0	1.11556	1.03354	1.09505	1.739	1.24707		0	1.84506	5.34875	4.69286	7.2072	5.53865
BCL2	0		0	2.79934	1.54238	1.66655	7.47041	6.78212		0	1.45593	0.445429	0.620113	3.86764	3.40673		0	2.53657	0.393599	1.68787	9.3532	8.31925
BCL2A1	0		0	-1.62562	2.74131	4.91185	2.80879	3.77833		0	-1.04772	0.898698	0.837788	0.904899	1.5168		0	-3.75954	2.17633	3.00183	3.8966	5.9128
BCL2L1	0		0	-2.73859	0.455899	0.662116	6.25406	6.71408		0	-1.07106	0.106406	0.231114	4.45048	4.46123		0	0.97382	0.30585	0.369397	10.9517	10.7171
BCL2L10	0		0	-2.54237	0.000785657	0.00436263	2.80981	2.82206		0	-2.2036	0.00866314	0.169379	0.0799703	0.166566		0	0.502753	0.818623	0.457366	0.4777	0.52785
BCL2L11	0		0	1.62497	0.53167	0.847469	8.78625	8.40907		0	-3.53428	0.221032	0.167195	3.89587	4.28737		0	0.475728	0.323879	1.22983	9.5954	9.551
BCL2L12	0		1.46056	-5.04241	0.402497	0.384172	3.97346	4.52551		0	-2.99229	0.103633	0.0706802	2.92939	3.20988		0.424368	-5.02087	0.451459	0.552536	7.7858	8.70445
BCL2L13	0		0	3.64409	0.399884	0.497779	8.67226	8.16645		0	2.24428	0.0592707	0.164965	4.21555	4.05208		0	0.969701	0.206701	0.550666	10.2867	9.97785
BCL2L14	0		0	-0.844969	0.000516474	0.0023011	2.61272	2.61433		0	-0.707758	0.0752654	0.162102	0.458036	0.386425		0	-0.600524	1.83362	3.65269	1.1987	1.31825
BCL2L15	0		0	-1.25598	0.000177677	0.000824117	2.3356	2.33797		0	-0.240377	0.0317431	0.0587613	1.2642	1.27007		0	1.35774	0.568435	1.01091	2.714	2.52555
BCL2L2	0		0.834427	4.67969	0.404967	0.357422	8.13046	7.62706		0	2.62578	0.151113	0.394717	4.83956	4.27651		0	4.59886	0.244189	0.624208	11.0846	10.2812
BCL3	0		0	-0.172374	0.565001	1.01455	6.95272	7.28799		0	-4.96772	0.270768	0.248275	2.85328	3.68533		0	-1.55773	0.565875	0.794996	9.3651	9.66025
BCL6	0		0	3.52119	0.851557	0.858687	10.6639	9.84223		0	0.461402	0.465849	0.24607	4.82639	4.85116		0	3.80784	0.661431	0.935691	10.8866	10.1703
BCL6B	0		0	-0.460943	0.633399	0.939682	7.05521	6.896		0	-1.93086	0.746912	0.553064	2.88904	3.09727		0	1.46903	0.91945	1.41592	9.2326	8.84835
BCL7A	0		0	1.41365	0.251655	0.20075	3.43297	3.32934		0	2.36786	0.273299	0.230423	2.64734	2.3859		0	1.37682	0.438931	1.20991	8.4681	8.07235
BCL7B	0		0.188313	4.25359	0.400331	0.693214	7.69771	7.11164		0	2.45299	0.113324	0.234746	4.6364	4.2018		0	4.4715	0.191485	0.163343	10.6994	10.1906
BCL7C	0		0	3.92087	0.345039	0.245233	7.93862	7.55978		0	3.35867	0.196759	0.114892	5.3713	4.80018		0	0.254383	0.22236	0.804684	10.2843	10.1645
BCL9	0		0	1.26087	0.0854833	0.0300457	3.38503	3.37592		0	1.86931	0.168202	0.287598	2.73732	2.33633		0	2.74284	0.345064	1.04313	9.8385	9.03585
BCL9L	0		0	-0.641481	0.422305	0.852769	6.05159	6.01749		0	-1.6042	0.24895	0.451429	2.84056	3.16338		0	2.13801	0.358751	0.72251	10.9367	10.7479
BCLAF1	0		0	-0.175794	0.172536	0.151359	11.3553	11.4126		0	0.308526	0.0660443	0.198059	5.3443	5.11268		0	0.14268	0.11949	0.244583	11.3433	11.3314
BCO2	0		0	1.56461	0.494768	0.48507	2.20247	2.1987		0	2.82604	0.357448	0.0429195	1.37222	1.12543		0	3.35618	1.62255	1.45438	4.8182	3.70745
BCOR	1		3.84874	6.31294	0.800598	0.943706	7.46626	6.31288		1.25722	6.58857	0.232089	0.0843455	3.88381	3.22412		0	4.20161	0.439814	1.01433	10.4618	9.7025
BCORL1	0		0	-0.734959	0.152221	0.238471	6.82244	6.90084		0	-2.37888	0.112931	0.0767252	1.35969	1.69465		0	1.54617	0.467101	0.541143	8.7544	8.3431
BCR	0		0	-2.04667	0.581119	0.877414	5.70314	6.08416		0	-0.369459	0.0984362	0.752407	3.08478	3.26272		0	-0.0809417	0.196907	0.423525	9.6844	9.69385
BCS1L	0		0	2.28727	0.516916	0.601352	7.41657	6.91866		0	1.163	0.103785	0.161426	3.74662	3.487		0	0.707296	0.256454	0.163717	8.8541	8.69535
BDH1	0		0	2.97121	2.84267	1.29998	3.31438	2.39229		0	2.02515	0.585551	0.545406	2.43526	1.67544		0	3.93523	1.60994	3.89137	8.2401	5.57465
BDH2	0		0	-3.72109	0.85738	0.682516	8.47893	9.02656		0	-1.62083	0.386424	0.260688	3.29619	3.53249		0	-2.94952	0.546109	0.409782	8.1873	8.8261
BDKRB1	0		0	-1.73409	0.898533	1.50116	2.18923	2.26634		0	-1.79176	1.04055	1.74703	0.951415	2.02199		0	-3.84832	3.41022	3.11635	4.4767	6.2322
BDKRB2	0		0.0552099	-4.17325	3.19178	4.28116	5.71538	7.59454		0	-2.28739	1.09477	0.965752	1.50987	2.58336		0	-1.72273	2.09094	2.94542	7.5771	8.5732
BDNF	0		0	2.75667	4.11175	1.78683	3.41284	2.55299		0.0228548	5.21524	1.25226	0.270802	2.6913	1.02813		0	1.0471	4.21039	3.07087	6.9326	6.094
BDP1	0		0	1.57137	0.546119	0.249036	9.74562	9.42275		0	1.19067	0.109157	0.0782286	4.36555	4.19103		0	2.91635	0.278943	0.753123	9.8856	9.17935
BECN1	0		0	3.82532	0.386025	0.27341	9.68097	9.1738		0	3.17206	0.113868	0.082112	4.52714	4.24504		0	3.17254	0.0819928	0.172271	10.9031	10.5394
BEGAIN	0		0	1.89295	1.77576	1.42481	2.17661	1.96441		0	1.3715	1.48474	0.656122	1.04251	0.744118		0	1.14946	5.69739	6.48505	6.1528	5.23985
BEND2	0		0	-0.615509	0.0239366	0.0233887	2.97527	2.97418		0	-1.39966	0.01162	0.0191936	0.47039	0.509434		0	-0.24812	0.599545	1.91102	0	0
BEND3	0		0	-0.755419	0.329156	0.264065	5.06843	5.19039		0	-1.84771	0.0868339	0.101631	1.08906	1.352		0	-1.71376	0.44527	0.358287	6.5069	6.89025
BEND4	0		0	-1.02153	0.000181296	0.526304	2.31044	2.31458		0	-1.89272	0.00263603	0.00585732	0.0484193	0.0642549		0	-2.16223	0.992031	4.61354	0.5218	1.60435
BEND5	0		0	1.4979	1.89487	2.89247	5.48711	5.02407		0	0.742303	0.276662	0.717702	2.56325	2.3262		0	4.64753	0.509399	5.32653	7.6481	6.0416
BEND6	1		5.05068	-6.89898	1.39459	3.20454	3.7126	6.59064		0	-3.17628	0.629527	0.958251	1.95636	3.51622		0	-1.21275	1.58227	4.2849	7.2063	7.9594
BEND7	0		0	-1.7621	1.02848	1.73519	2.87873	3.16068		0	-0.124888	0.76627	0.934275	1.82286	1.66744		0	-1.60134	1.97074	3.39777	5.8879	7.0648
BEST1	0		0	-0.272547	0.391041	0.448931	3.6388	3.76801		0	0.766376	0.391592	0.472037	2.32526	2.11568		0	2.84584	1.03858	1.13868	6.8078	5.8816
BEST2	0		0	1.74613	3.48474e-05	2.12705e-05	1.91625	1.91344		0	0.0662159	0.0159159	0.0667628	0.254037	0.163385		0	-1.04365	0.337894	0.798176	0.5218	0.6828
BEST3	0		0	-0.696642	0.535971	0.860091	2.40855	2.41754		0	-0.481436	0.0171	0.0358851	0.628191	0.576628		0	-3.33868	1.06832	11.88	1.0117	2.49275
BEST4	0		0	0.303492	0.00650404	0.00255209	2.50064	2.49905		0	-0.1892	0.116275	0.0823658	0.461769	0.538821		0	0.817709	0.860252	1.48864	3.0112	2.55515
BET1	0		0	-3.5024	0.395969	0.52902	8.10855	8.52053		0	-2.83694	0.103039	0.177331	4.27968	4.67813		0	-3.58212	0.181634	0.339094	8.6997	9.2592
BET1L	0		0.35654	-4.36688	0.660632	0.795216	6.89188	7.62508		0	-1.35869	0.24062	0.21836	3.95354	4.05122		0	-1.92853	0.2507	0.265054	10.5957	10.7729
BEX1	1		4.99824	7.45706	13.7694	3.1608	8.53147	2.55833		0.31131	5.52815	4.34658	1.23441	4.05229	0.645994		0	3.51358	8.71055	6.99254	5.8976	2.45965
BEX2	0		0	3.40322	8.68039	4.15364	6.16539	3.51769		0	1.4194	2.47913	1.27244	1.52295	1.29726		0	3.12345	5.85502	5.4464	5.959	3.39835
BEX4	0		0	0.226585	2.42373	2.10874	7.28859	6.92274		0	1.12485	1.25062	1.06825	4.013	3.56053		0	1.06999	1.58685	1.0097	8.6904	8.399
BEX5	1		3.76735	6.59355	9.00446	2.96991	7.72357	2.32643		0	3.76196	2.15288	1.17345	2.47436	0.283167		0.849803	5.37223	4.55555	4.90601	6.7132	2.6529
BFAR	0		0	1.10706	0.573811	0.326581	9.20792	9.14021		0	1.25136	0.150803	0.142532	4.34669	3.99814		0	-0.453871	0.107703	0.108271	10.3926	10.3759
BFSP1	0		0	4.16876	0.642661	0.0705017	3.05814	2.73966		0	4.57286	0.234548	0.171795	1.5811	0.889648		0	4.23706	0.620297	1.10394	6.7113	5.5844
BFSP2	0		0	-2.07917	0.000157393	0.000165018	2.42584	2.43613		0	-0.409421	0.0178924	0.0235092	0.128352	0.112675		0	-0.0678704	0.894867	1.26648	0.9813	0.78745
BGLAP	0		0	-3.00333	0.398278	1.81977	3.14425	3.5038		0	-1.02861	0.17683	0.227223	1.20085	1.51838		0	-4.45087	0.63085	1.37865	5.1732	6.36885
BGN	0		0	1.26259	0.855129	3.94796	10.8242	10.9996		0	-1.21076	0.343457	1.61742	6.75979	7.57701		0	0.7292	0.64252	5.14505	14.8002	15.1304
BHLHB9	0		0	1.5606	0.991848	1.05298	4.45645	3.60952		0	2.08672	0.106067	0.632494	2.70504	2.11009		0	2.35848	0.338123	0.479327	7.5767	7.0042
BHLHE22	0		0	1.76011	6.0192	4.60872	4.14942	2.7287		0	0.496953	1.46848	0.949473	1.37351	1.07593		0	3.30577	6.15475	5.57623	6.9282	3.97325
BHLHE23	0		0	-0.623535	6.61578e-05	6.83294e-05	2.21151	2.21241		0	1	0.000591751	0	0	0		0	-1.99809	0	0.14897	0	0
BHLHE40	0		0	-2.61743	1.53026	1.62964	10	10.9402		0	-4.09453	1.18833	0.705619	4.73708	6.10152		0	-3.43864	1.36037	1.18306	11.1016	12.1822
BHLHE41	0		0	0.127958	4.3208	3.81436	9.10609	8.90868		0	0.162276	0.75766	1.75913	3.8946	3.45705		0	0.535721	1.26539	4.3516	9.4285	9.5209
BHMT	0		0	1.17888	1.07829	0.0105705	1.99105	1.99068		0	0.075294	0.144301	0.292388	0.582304	0.481965		0.620057	5.18281	2.65568	1.3288	2.9138	0.77885
BHMT2	1		2.05685	5.50473	6.13667	2.77982	7.96379	3.9321		0	2.31941	0.908166	2.30364	3.84176	2.34884		1.29292	5.73776	7.10294	3.80299	9.291	4.6888
BICC1	1		4.3789	-6.56322	1.78564	2.53828	5.33797	7.04838		0	-4.56914	0.616202	0.520921	3.04559	4.57415		0	-2.57575	1.39089	2.32944	6.5573	7.4846
BICD1	0		0	-0.524189	0.929197	1.23534	6.88695	6.8653		0	-1.37566	0.124453	0.304669	2.2048	2.62411		0	-1.15916	0.819578	0.81369	7.0496	7.4791
BICD2	0		0	0.384031	0.329745	0.228717	9.76389	9.85774		0	-1.44552	0.135902	0.419993	4.50922	4.54696		0	0.864572	0.161325	0.208948	10.8259	10.5717
BID	1		5.28207	-7.02783	1.34116	1.66941	4.32298	6.34769		0.252373	-5.46401	0.120656	0.234539	2.55869	3.32945		4.35787	-8.35109	0.576325	0.452375	7.529	9.1824
BIK	0		0	0.451062	0.0117533	0.00498787	2.45185	2.45861		0	0.710618	0.0864543	0.0521943	0.476239	0.511128		0	-1.89109	1.78786	1.66626	1.236	2.19075
BIN1	0		1.14266	-4.83191	0.464403	1.03092	7.19878	8.06522		0	-2.07178	1.09212	0.504322	4.26181	4.71472		0	-3.42793	0.914814	1.72359	10.5859	11.5815
BIN2	0		0	-3.21606	1.04693	0.801029	5.1343	5.90807		0	-2.35379	0.336401	0.495224	1.83929	2.70138		0	-2.79473	1.80039	1.91269	6.5683	7.55125
BIN3	0		0	-3.23299	0.661849	0.341511	6.3974	6.91593		0	-4.87245	0.161172	0.125108	3.05067	3.59965		0	-3.77472	0.184285	0.472055	8.3791	8.89795
BIRC2	1		8.09302	-8.42325	0.317739	0.349596	9.55841	10.4164		0	-2.27291	0.0765665	0.286253	4.44522	4.73688		0.459413	-5.05019	0.13852	0.33093	9.5002	10.3537
BIRC3	0		0	4.07502	2.06712	1.84005	6.91559	5.7394		0	1.34291	0.496443	2.24986	3.40008	2.64037		0	2.96567	1.362	3.47457	8.5778	6.98585
BIRC5	0		0	0.142343	2.17608	3.69606	8.14209	8.52175		0	-1.50972	1.47835	1.07753	4.05705	4.60437		0	-3.48253	1.54657	1.42004	8.784	9.59985
BIRC6	0		0	-2.3503	0.162757	0.206916	8.98078	9.24186		0	-1.69543	0.0918561	0.064684	5.02127	5.19788		0	0.314535	0.39745	0.481204	10.584	10.5317
BIRC7	0		0	0.574457	0.413733	0.498181	5.36098	5.29766		0	-2.18497	0.0784354	2.73604	0.143163	0.825092		0	-2.56236	1.62177	11.8003	1.3333	2.69825
BIVM	0		0	-4.00175	1.23662	0.82538	6.67982	7.56779		0	-2.91869	0.269832	0.318635	3.59595	3.95726		0	-0.894516	0.370265	0.364497	8.7862	8.8292
BLCAP	0		0	-2.14326	0.337799	0.450299	9.01611	9.24561		0	-1.13322	0.0882848	0.123162	5.03976	5.24812		0	-2.65633	0.158446	0.498057	10.3992	10.8673
BLID	0		0	-1.06773	2.45268e-05	0.0324704	1.97584	1.97611		0	-0.0432064	0.583062	1.88209	2.03338	1.68701		0	0.289957	0.108337	0.153426	0	0
BLK	0		0	0.747118	0.0903472	0.00418223	2.11351	2.11172		0	-1.86073	0.0261138	0.0597222	0.0416671	0.263522		0	-2.06994	1.6847	9.24621	0.5061	1.26355
BLM	0		0	-1.04942	1.54406	2.04955	4.16817	4.50796		0	-2.75753	0.420812	0.337955	1.85648	2.5003		0	-3.24082	1.01474	0.570306	6.5781	7.2896
BLMH	0		0	-0.570902	1.01591	0.862051	7.38022	7.30889		0	-1.3184	0.192154	0.130975	3.75069	4.14005		0	-2.88967	0.192847	0.420292	9.6482	10.0909
BLNK	0		0	3.38742	2.7099	3.72564	6.94789	5.42629		0	1.17639	0.45902	0.319893	2.15906	2.0989		0	2.65824	1.13878	2.02117	7.1131	6.10265
BLOC1S1	0		0	1.3064	0.502166	0.245047	9.49072	9.26419		0	3.39549	0.146027	0.0861568	6.16004	5.96391		0	-0.465252	0.504885	0.965445	10.293	10.359
BLOC1S2	1		10.5733	-9.85242	0.667294	0.496215	7.42713	9.03095		0.35685	-5.57803	0.106772	0.110176	2.68337	3.32437		4.65702	-8.62164	0.222751	0.547063	7.5589	9.44285
BLOC1S3	0		0	-1.96277	0.464517	0.296776	5.41783	5.721		0	-3.32117	0.0558179	0.168865	2.46087	2.77288		0	-2.95677	0.21388	0.238814	8.1331	8.58075
BLVRA	0		0	-0.652925	0.616416	0.438986	9.29445	9.3631		0	-0.292697	0.314917	0.172143	5.12277	5.19138		0	-0.3872	0.399514	0.827973	9.916	10.1212
BLVRB	0		0	2.45253	0.529871	0.90728	9.42808	9.12204		0	2.05934	0.320425	0.468482	6.02688	5.22916		0	2.67245	0.361136	0.895223	10.6308	9.8027
BLZF1	0		0	-0.0520357	0.457104	0.32995	7.47253	7.37693		0	-0.616891	0.0736811	0.126004	4.06288	4.21511		0	1.80924	0.238819	0.311299	9.0447	8.9169
BMF	0		0	2.41176	0.348201	0.317608	4.9614	4.65797		0	1.59153	0.360775	0.190429	3.44621	3.08107		0	4.26646	0.480335	0.718199	9.864	8.9994
BMI1	1		5.06484	-7.10919	0.66427	0.404382	9.49686	10.6671		0	-1.48498	0.31096	0.342701	4.49314	4.79969		0	-3.00238	0.457857	0.472414	9.8108	10.6049
BMP1	1		3.87811	-6.31084	0.900306	1.26016	6.92905	8.46873		0.125093	-5.32584	0.440531	0.614542	4.07396	5.4695		0.602511	-5.16823	0.594189	0.904925	10.4764	11.4604
BMP10	0		0	0.475035	8.27191e-05	0.000104504	2.14221	2.14141		0	1.41262	0.209682	0.000826904	0.0316158	0.0366395		0	1.73839	1.48307	0.189648	0	0
BMP15	0		0	-0.889658	9.65658e-05	0.000212216	2.29626	2.30299		0	-1	0	0.000425152	0	0		0	-0.480058	0.0160971	0.0291933	0	0
BMP2	0		0	-0.257446	2.23287	2.41019	3.49568	3.54753		0	-1.65805	0.885221	1.33685	1.6483	1.62337		0	-0.345076	2.90052	3.55549	6.5582	6.3802
BMP2K	1		5.91575	-7.33965	0.685894	0.852482	6.85041	8.07323		1.66552	-7.06774	0.118064	0.204908	4.22062	5.30149		0.115567	-4.76454	0.769328	0.510009	7.7514	8.71205
BMP3	0		0	-1.87407	1.9489e-05	4.09309e-05	2.17274	2.17567		0	-2.69312	0.0139566	0.0165219	0.328657	0.422787		0	-2.40489	0.53543	5.91759	0	0.75705
BMP4	0		0	-3.50765	0.381903	1.8432	2.62082	2.73228		0	-0.980303	0.52537	0.754622	1.27497	1.50291		0	-1.47654	1.7418	3.55095	6.695	7.6457
BMP5	0		0	-1.49509	0.149066	2.5602	2.59395	2.61378		0	-0.961524	0.0565947	0.0237131	0.0245021	0.101126		0	-3.28652	0.44193	16.2412	0	1.44175
BMP6	0		0	-0.826932	0.523573	1.94259	2.26237	2.26572		0	-0.405981	0.244076	0.674805	1.08162	0.927984		0	-0.583922	1.17402	3.53601	5.966	6.0026
BMP7	0		0	-3.74602	0.0659259	2.72076	3.19909	3.2344		0	-1.93027	0.0408793	1.29868	1.17086	1.49673		0	-3.54896	1.86459	16.0327	1.5277	3.51775
BMP8A	0		0	-1.41266	0.00642002	0.0893371	2.34673	2.3554		0	-2.0933	0.0565994	0.240021	1.71816	2.06018		0	-1.38684	0.844776	2.3454	6.3627	6.45605
BMP8B	0		0	-2.82488	0.398368	1.7042	4.47948	4.73905		0	-0.0456753	0.255469	0.870389	1.19594	1.14235		0	-1.04734	2.73328	2.9704	4.514	4.90395
BMPER	0		0	1.1424	1.71057	0.38106	2.95666	2.9569		0	0.0922547	1.94304	1.45909	1.59131	1.71672		0	3.99919	3.03455	3.9158	7.1425	5.60415
BMPR1A	0		0.314288	4.33827	0.984772	1.25597	9.51152	8.33526		2.87773	8.5903	0.254893	0.107668	5.29797	4.21467		0	2.90773	0.37612	2.85529	9.5468	8.4762
BMPR1B	0		0	0.0696833	5.47759	5.29901	4.37957	5.15918		0	-0.0724442	2.40321	1.58441	1.81179	2.44934		0	0.582061	7.50186	7.4383	7.018	6.68795
BMPR2	0		0	0.0065	0.378593	0.716043	9.57004	9.61162		0	1.03556	0.142325	0.15952	4.43348	4.43595		0	1.23966	0.300774	0.766486	11.1759	10.6707
BMS1	1		2.68453	-5.76515	0.3188	0.240015	7.60296	8.33732		0	-4.9313	0.0683131	0.0761978	3.29656	3.80384		0	-3.51217	0.21361	0.263605	9.8937	10.2953
BMX	0		0	-1.00854	0.000598342	0.0497603	1.98775	1.98754		0	0.143144	0.158158	0.140671	0.619626	0.621419		0	2.93418	2.03985	3.93288	4.923	3.2298
BNC1	0		0	-2.99953	0.00083323	1.85031	2.6037	2.62159		0	-3.21043	0.0102511	0.886058	0.0428111	0.772481		0.31119	-4.92705	0.619107	12.3946	0.5301	3.82045
BNC2	0		0	-1.61335	1.52352	2.56593	9.30427	9.77294		0	-0.689073	0.333878	0.780547	3.99313	4.22006		0	0.602865	0.386022	0.870961	10.1051	10.1038
BNIP1	0		0	-0.346768	0.338273	0.29281	5.9204	5.92876		0	-3.79629	0.0755861	0.0794154	2.95452	3.41065		0	-2.66253	0.272658	0.630271	7.6345	8.14235
BNIP2	0		0.52777	4.49105	0.212582	0.190213	9.15472	8.58575		0	5.0688	0.0771624	0.0537755	5.22989	4.69252		0	4.0314	0.120101	0.28739	10.3294	9.79915
BNIP3	0		0.863393	-4.69935	3.36738	2.90225	8.12719	9.42524		0	-4.21512	0.599284	0.511166	3.4883	5.08601		1.78656	-6.14555	1.5601	1.89699	8.2069	10.0503
BNIP3L	0		0	1.87245	0.365896	0.549395	11.6152	11.3476		0	0.12132	0.261397	0.155195	6.1207	6.0843		0	0.946326	0.257373	0.883775	11.8783	11.5584
BNIPL	0		0	-2.32121	0.000393475	0.000586771	2.59024	2.6003		0	-0.751549	0.0314848	0.106798	1.45442	1.60789		0	-2.0208	0.907217	0.33734	2.0412	2.48775
BOC	0		0	2.78471	2.13505	4.10588	9.09192	8.0155		0	4.19534	1.10039	0.498715	4.24574	3.00149		0	1.81623	1.56034	4.86346	10.6465	8.9943
BOD1	0		0	-0.498735	0.312978	0.26179	10.0383	10.1014		0	-2.05152	0.111788	0.0858539	4.48394	4.79886		0	-2.18857	0.151951	0.18896	10.1105	10.3045
BOK	0		0	0.289214	3.01633	2.58092	3.65023	3.70644		0	-0.853603	1.49737	0.587444	1.79652	2.56833		0	-1.09251	3.79708	5.15182	8.2972	8.98165
BOLA1	0		0	2.3813	0.477627	0.565561	5.50967	5.02125		0	2.75	0.156157	0.262639	4.17004	3.69916		0	3.56908	0.281171	0.330267	8.3764	8.03115
BOLA2	0		0	-2.67927	0.524913	0.480049	8.78754	9.10459		0	-1.61493	0.150767	0.344081	4.30405	4.78393		0	-4.20343	0.200596	0.801965	9.4079	10.1944
BOLA3	0		0	-0.549748	0.584173	0.605152	10.0496	10.2151		0	0.0953541	0.301179	0.342727	4.40212	4.48198		0	-3.9611	0.378727	0.342685	7.6794	8.1427
BOLL	0		0	1.01687	0.00817878	2.87681e-05	2.06215	2.06124		0	-1.9625	0.0176336	0.0973687	0.49599	0.652039		0	-1.92714	0.0261295	2.23883	0	0
BOP1	0		1.3242	-4.947	0.444567	1.24833	4.67956	5.39974		0	-3.97962	0.230214	0.353497	3.44362	4.06182		0	-4.39561	0.490741	1.48358	7.9079	9.0614
BPGM	0		0	-2.74597	0.500878	1.2284	5.35254	5.70491		0	-4.0938	0.0805868	0.0963151	3.54844	4.0128		0	-3.11516	0.272338	0.203809	8.7133	8.86875
BPHL	0		0	-2.79281	0.355895	0.286463	5.75738	6.01187		0	-2.8927	0.2243	0.0657941	2.7309	2.86456		2.55298	-6.78567	0.264945	0.1551	7.5314	8.30765
BPI	0		0	3.80584	2.76261	0.198627	2.68875	2.44693		0	5.12489	0.266935	0.00622466	0.516335	0.136542		0	3.16294	4.87919	3.65239	3.4321	1.6808
BPNT1	0		0	0.489126	0.354701	0.39271	4.966	4.75463		0	1.55432	0.0352083	0.0701081	3.45551	3.32769		0	0.798638	0.119938	0.262379	8.9724	8.7297
BPTF	1		4.01925	-6.39656	0.268287	0.326216	9.45996	10.104		0	-2.57805	0.171375	0.12974	4.04701	4.52895		0	0.0472607	0.250614	0.956904	10.0841	9.9562
BRAF	0		0	2.56457	0.764311	1.10483	5.86744	5.15798		0	0.349231	0.109247	0.072257	3.88026	3.76249		0	-1.53841	0.402026	0.290496	6.8412	6.8482
BRAP	0		0	0.372448	0.713126	0.356792	6.74912	6.68195		0	1.60561	0.0908481	0.0498731	3.45572	3.24187		0	-0.866204	0.136844	0.20356	9.0685	9.13635
BRCA1	0		0	0.300703	0.656665	0.808302	6.78548	6.68605		0	0.0784228	0.191996	0.417462	3.08858	3.03477		0	1.31595	0.262725	0.550517	8.649	8.51355
BRCA2	0		0	1.04587	0.87563	1.0215	4.42496	4.32856		0	-0.711441	0.615179	0.571909	2.73943	2.99758		0	1.17214	1.52975	1.60083	7.1257	6.8944
BRCC3	0		0	0.418576	0.145709	0.212027	8.4223	8.30273		0	-1.07563	0.0605216	0.157224	3.24972	3.37128		0	-0.345691	0.152245	0.542703	8.3563	8.5807
BRD1	0		0	-1.09939	0.500837	0.29151	7.98918	8.05594		0	-1.87605	0.122408	0.0655189	3.96053	4.21824		0	0.92972	0.168007	0.479322	9.8845	9.73255
BRD2	0		0.873128	-4.67676	0.474869	0.623357	9.50102	10.3183		0	-1.78055	0.132495	0.233215	5.31787	5.52522		0	-0.980655	0.170405	0.188276	12.0927	12.1951
BRD3	0		0	2.32037	0.335258	0.319682	9.42418	9.18195		0	0.372808	0.101709	0.176154	3.79394	3.81018		0	2.57457	0.319265	0.443396	10.3134	9.7472
BRD4	0		0	0.583999	0.196369	0.23363	9.93668	9.88199		0	-1.12244	0.1426	0.338807	3.68547	3.96858		0	3.0897	0.207921	0.374472	11.3212	10.7767
BRD7	0		0	1.03683	0.462795	0.602638	8.3292	8.11294		0	2.45567	0.132876	0.140808	4.49544	4.14594		0	1.0033	0.234513	0.0753617	9.5719	9.52215
BRD8	0		0	3.47742	0.350043	0.257564	9.38763	8.84343		0	0.688341	0.196563	0.0801353	4.33436	4.30867		0	3.23106	0.118473	0.328214	10.4795	9.9703
BRD9	0		0.501469	-4.48671	0.393767	0.305059	7.07889	7.68817		0	-3.04009	0.136137	0.196702	3.62663	3.98765		0	-1.89585	0.186533	0.385509	9.5369	9.9318
BRDT	0		0	-1.36162	0.000904014	0.0010087	2.6062	2.61808		0	-0.219614	0.0102772	0.00600815	0.339054	0.37134		0	-0.861454	0.106099	0.487925	0	0
BRE	1		4.6764	-6.77915	0.615015	2.27685	7.56922	8.8431		0	-4.17661	0.146033	1.27401	4.70411	6.36348		0.351016	-4.96006	0.386761	0.612607	8.8421	9.90595
BRF1	0		0	-1.6743	0.209417	0.459216	4.42982	4.49925		0	-2.04289	0.126344	0.102132	3.51274	3.73986		0	-2.44296	0.223718	0.218605	9.5326	9.88815
BRF2	0		0	-0.250926	0.417904	0.548837	6.73315	6.71614		0	3.44535	0.131686	0.0570356	3.5844	3.23321		0	0.28009	0.161538	0.295635	8.9719	8.98785
BRI3	0		0	-2.77231	0.288683	0.333824	10.2658	10.5851		0	-1.82284	0.281475	0.359066	6.25788	6.63882		0	-2.13095	0.341226	1.14357	10.609	10.9273
BRI3BP	0		0	-0.232387	0.913921	1.29394	7.21661	7.36957		0	1.02839	0.378175	0.290344	2.78947	2.40009		0	-1.3234	0.527305	1.06914	5.3479	5.97235
BRIP1	1		9.82131	9.21776	1.20418	3.24568	8.41836	5.56129		0.0488064	5.24358	0.215226	0.40891	4.29435	3.30383		2.80466	6.99838	0.874023	1.23063	8.6329	6.65215
BRIX1	0		0	1.18436	0.176982	0.133972	6.20068	6.09253		0	-0.769085	0.0822622	0.304651	4.62052	4.80035		0	-1.49533	0.236948	0.490358	9.1477	9.53645
BRMS1	0		0.484368	-4.43679	0.587935	1.04319	6.40888	7.05188		0	-2.8685	0.0898215	0.288515	3.84085	4.35795		0	-3.39097	0.202447	0.853281	9.4602	10.1245
BRMS1L	0		0.194105	4.2782	0.331163	0.311131	9.02445	8.49564		0	3.61484	0.212038	0.118436	3.13278	2.43451		0	2.16065	0.287249	0.42677	8.391	8.11325
BRPF1	0		0	-1.06065	0.195576	0.370047	7.24821	7.23176		0	-0.364763	0.0935846	0.125492	3.12344	3.36941		0	2.18062	0.0990044	0.266264	9.6501	9.4766
BRPF3	0		0	-1.01724	1.19516	1.28389	3.9447	4.38132		0	-3.35659	0.176066	0.0700386	2.67062	3.09374		0	2.17862	0.300152	0.634025	9.8965	9.3813
BRS3	0		0	0.979333	0.799312	0.000652639	2.55713	2.56127		0	2.14313	1.28598	0.028467	0.0749782	0.0994295		0	3.58923	5.62225	0.0288097	0	0
BRSK1	0		0	-1.10145	0.273863	0.275808	5.84207	5.99891		0	2.04608	0.544565	0.520566	2.61099	1.85724		0	2.68405	0.474231	3.40856	8.0852	7.5448
BRSK2	0		0	-0.983138	6.89665e-05	0.0422817	2.16587	2.16568		0	2.09155	0.45576	0.350935	0.890817	0.197048		0	2.94771	3.62399	3.746	4.1966	1.98745
BRWD1	0		0	-0.393991	0.498383	0.60508	5.71069	5.6882		0	0.324605	0.166962	0.138801	5.12023	5.04452		0	1.6483	0.210532	0.419533	9.9899	9.7061
BRWD3	0		0	-1.58572	0.132663	0.178958	5.70557	5.79443		0	0.148144	0.0518022	0.267554	3.30637	3.28861		0	-0.187415	1.16875	0.816449	7.1858	7.2302
BSCL2	0		0	-3.20075	0.59901	0.508374	7.24987	7.69614		0	-1.58319	0.165954	0.148949	4.22889	4.48907		0	-1.96306	0.258147	0.247365	10.2271	10.4177
BSDC1	0		0	-1.48236	0.285233	0.455403	9.31774	9.54528		0	-0.329819	0.11234	0.310236	4.83071	5.05282		0	1.48906	0.157593	0.119221	10.8902	10.7837
BSG	0		0	-2.92847	1.50367	0.945737	8.48892	8.90877		0	-1.2804	0.24249	0.244943	6.84595	7.05429		0	-1.48334	0.561357	0.44195	13.1469	13.3184
BSN	0		0	1.15067	0.0246652	3.21176e-05	1.81543	1.81225		0	1.94083	0.141309	0.144213	0.811458	0.479677		0	3.32105	2.04885	3.4147	6.1985	4.77155
BSND	0		0	-1.99672	0.000125548	0.00518865	2.31421	2.3179		0	0.0471868	0.00525959	0.00982944	0	0		0	2.8511	0.592733	0.0819135	0	0
BSPRY	0		0	3.71852	2.13031	0.000243908	2.55382	2.54263		1.40106	6.75585	0.781564	0.0772307	1.89404	0.248511		4.51754	8.495	7.2713	1.45762	6.8339	1.98235
BST1	0		0	-2.76377	0.496037	0.780676	3.33146	4.02475		0	0.515897	0.449261	0.577398	2.85365	2.61092		0	0.286548	0.881946	1.8788	7.2608	7.04365
BST2	0		0	0.986098	5.49611	5.6503	7.71227	7.45192		0	1.41933	1.53441	1.1097	5.15676	4.72037		0	-0.0305153	2.57506	3.44517	10.6441	10.4902
BTAF1	0		0	-0.82471	0.545359	0.217715	8.79395	8.81608		0	0.0268372	0.19088	0.221051	4.57049	4.55781		0	2.00318	0.54224	0.888408	9.2951	9.0957
BTBD1	0		0	-3.96349	0.254532	0.369212	10.413	10.7749		0	-1.27945	0.169175	0.141697	5.07097	5.40369		0	-3.70241	0.191085	0.310755	10.3841	10.7899
BTBD10	0		0	1.69148	0.499033	0.330871	7.84554	7.49253		0	5.01803	0.0676081	0.133958	4.61282	3.99534		0	4.41392	0.294108	0.10346	9.5451	9.0224
BTBD11	0		0	-0.974453	1.24166	2.73386	2.60933	2.62334		0	-2.29322	0.6809	0.93314	0.394543	1.21526		0	-3.04777	4.35112	4.41681	3.5431	6.3947
BTBD16	0		0	-0.141511	9.2961e-05	0.000130419	2.02748	2.02715		0	4.88276	0.238135	0.0126103	0.415064	0.0982303		0.911002	5.42294	1.40124	0.55303	2.1178	0.445
BTBD17	0		0	-1.2428	0.00150035	0.019911	2.04105	2.04267		0	-0.827328	0.00164111	0.00359263	0	0		0	-1.27713	0.0695421	0.487428	0	0
BTBD18	0		0	-1.34708	0.00184669	0.0305755	2.64136	2.65246		0	-0.24215	0.0836159	0.350263	1.12478	1.16428		0	0.971448	0.380422	0.399823	1.1359	1.04395
BTBD19	1		2.41608	-5.54458	1.20161	1.68508	4.6784	6.32502		0	-3.31948	0.301623	0.867272	2.82957	3.90237		0	0.045989	1.10339	1.06108	5.6474	5.25065
BTBD2	0		0	-1.20986	0.173429	0.159661	6.8072	6.86		0	-0.529787	0.232282	0.213569	4.71664	4.81555		0	-2.70505	0.364435	0.247979	11.1694	11.4669
BTBD3	0		0	-1.73827	0.508722	1.47918	7.73163	8.10744		0	-0.794065	0.232245	0.447098	3.92254	4.32793		0	-0.710788	0.355055	1.21016	9.2405	9.4458
BTBD6	0		0	2.45624	0.369114	0.466054	9.29344	9.01722		0	1.48897	0.175643	0.180468	5.36099	4.95442		0	-0.751103	0.295049	0.735864	10.9639	11.1629
BTBD7	0		0	0.749648	0.27771	0.415932	8.31804	8.37631		0	1.75487	0.0549134	0.113457	4.04538	4.00129		0	1.19575	0.348335	0.379914	9.8547	9.55
BTBD8	0		0	-0.968982	0.000875472	0.00110834	2.55081	2.5567		0	1.27113	0.19479	0.320053	2.78384	2.57448		0	3.12707	1.14201	0.64114	3.2596	2.2969
BTBD9	0		0	-3.72341	0.459656	0.641963	5.62819	5.9998		0	-1.79396	0.149777	0.358596	2.49159	2.67533		0	-0.551706	0.310901	0.390124	8.5699	8.7117
BTC	0		1.64948	5.54241	3.9734	0.187658	4.00104	2.73957		0.708931	5.96667	1.50346	0.732258	2.92332	0.208578		9.97874	14.2278	2.47244	1.24927	6.4425	0.57465
BTD	0		0	-2.25284	0.158117	0.297956	4.19479	4.37717		0	-1.06556	0.310949	0.23638	3.01408	3.23032		0	-1.45374	0.455215	0.27404	8.043	8.43265
BTF3	0		0	-0.283595	1.56991	0.133581	13.3678	13.1488		0	1.37371	0.230332	0.124455	7.70275	7.59986		0	-0.114117	0.296876	0.620724	12.854	12.8488
BTF3L4	0		0	-0.0323004	0.143756	0.452933	9.50501	9.59293		0	-0.564294	0.0626449	0.226274	4.45325	4.38919		0	-1.86997	0.0657913	0.292655	9.6838	9.8745
BTG1	1		7.21134	7.93229	0.325821	0.635207	12.5843	11.5412		0	2.9225	0.277591	0.508221	5.4039	4.78114		0	3.42205	0.257676	0.361031	12.2719	11.7206
BTG2	0		0	3.18531	1.47205	3.21762	8.08969	7.1188		0	2.24368	0.384327	1.87257	4.88397	3.71756		0	3.5602	0.976791	3.05057	11.0266	9.0811
BTG3	1		4.91582	6.88157	0.418904	1.39256	11.4628	10.1553		0.467724	5.69972	0.311775	0.319855	5.57724	4.60851		0	3.27912	0.995448	0.706267	10.5837	9.5881
BTG4	0		0	1.47567	1.93123e-05	1.9277e-05	1.97041	1.97046		0	2.83118	0.231858	0.0290437	0.187281	0.0907219		0	2.48393	1.7494	1.06812	1.5215	0.34735
BTK	0		0	-2.73827	0.196275	0.502771	6.06414	6.30033		0	-2.02362	0.278391	0.7331	1.98571	2.3145		0	-2.72312	1.64859	1.5759	6.5221	7.5278
BTLA	0		0	-0.463581	0.00808791	0.0357778	2.1025	2.10308		0	-0.93999	0.140239	0.590806	0.341279	0.382752		0	-0.544366	2.02503	5.52951	2.6381	2.4791
BTN1A1	0		0	0.825166	1.87043e-05	1.9355e-05	1.86311	1.86151		0	0.83464	0.0507567	0.0503735	0.268191	0.102596		0	0.400188	0.711885	1.0325	0.9186	0.79055
BTN2A1	0		0	-0.210582	0.55071	0.30785	8.39441	8.42041		0	1.55631	0.227153	0.172202	4.11798	3.8593		0	1.14506	0.264366	0.450391	10.2118	9.9936
BTN2A2	0		0	1.83684	0.467678	0.674338	7.40382	6.99524		0	2.27593	0.154684	0.445232	3.1457	2.71167		0	2.72691	0.348569	1.05077	8.8324	8.0741
BTN3A1	0		0	-3.42422	1.30301	0.798619	7.53208	8.29838		0	-2.74475	0.492207	0.293489	3.56085	3.99466		0	-1.26565	0.898472	1.56356	9.1486	9.9402
BTN3A2	0		0	-1.43732	1.01714	1.38274	10.0137	10.3287		0	-1.54607	0.697542	0.452081	3.68971	3.59126		0	-1.90472	1.44417	1.07874	10.1	10.2805
BTN3A3	0		0	-1.68789	1.27324	1.49819	7.62623	8.34352		0	-2.08745	0.582145	0.432965	3.4208	3.67143		0	-1.04897	1.06519	1.27644	9.1775	9.5299
BTNL2	0		0	-0.476752	1.34279e-05	0.000255358	1.94735	1.94716		0	3.69001	0.218219	0.00125905	0.180617	0		0	3.63075	0.292352	0.0145692	0	0
BTNL3	0		0	-1.02887	0.0849824	0.0466533	3.75573	3.83112		0	1.24648	0.147031	0.0109144	0.0426791	0.0422398		0	2.12847	2.99892	0.797519	0.4083	0
BTNL8	0		0	-0.485365	0.10173	0.124543	2.25127	2.25215		0	2.74109	0.549496	0.0206224	0.148902	0.114343		0	2.10405	5.45032	5.91108	2.5181	0.34735
BTNL9	0		0	1.64378	2.54261	3.74228	5.76983	4.85944		0	1.70563	0.906827	1.39012	2.35327	1.23081		0	3.15029	2.09608	6.30967	7.7809	5.98815
BTRC	1		5.76465	-7.33355	0.520768	0.478971	5.62592	6.52166		0	-3.43796	0.215458	0.0606052	2.36208	2.7236		1.20216	-5.663	0.220276	0.327146	7.8357	8.7581
BUB1	0		0	2.98177	2.01299	3.00246	7.41402	6.72359		0	-0.482714	1.15102	0.797973	4.06392	3.93528		0	-0.125498	1.297	0.964744	9.3877	9.4442
BUB1B	0		0	1.71966	1.734	3.41729	8.78511	8.73379		0	-0.641452	0.904417	0.62315	3.46572	3.71353		0	-1.24427	1.51379	0.811321	8.8887	8.97965
BUB3	0		0	-2.70816	0.685174	0.527844	10.6913	11.033		0	-1.15139	0.230408	0.294027	5.38	5.65626		0	-2.95552	0.393923	0.248352	10.5077	11.047
BUD13	0		0	-0.908614	0.398712	0.329434	7.3562	7.64436		0	0.15122	0.113018	0.371206	3.36666	3.38662		0	0.702088	0.163467	0.16919	8.8166	8.75225
BUD31	0		1.15653	-4.8405	0.199699	0.284294	9.53338	10.0128		0	-2.64602	0.122576	0.110908	4.11486	4.5461		0	-4.09685	0.20952	0.504977	9.9818	10.5905
BVES	1		2.68733	5.68823	1.3789	2.00262	7.66828	5.67749		2.1854	7.70114	0.211665	0.174441	3.94848	2.73842		0	4.32157	0.334992	2.29003	10.0869	8.6886
BYSL	1		5.00825	-7.02956	0.110041	0.589832	6.60136	7.23719		0	-4.43293	0.0960388	0.223533	2.36226	3.17285		0.777702	-5.31277	0.160866	0.875428	8.0754	9.0344
BZW1	1		7.08419	-7.97575	0.245304	0.236078	10.8162	11.6445		0.0709159	-5.26739	0.107165	0.171517	5.64166	6.45101		2.87765	-7.0603	0.164896	0.244774	10.9976	11.9012
BZW2	1		2.81783	-5.95499	1.76687	0.788062	9.07075	10.4159		0	-4.44062	1.0704	0.53901	3.89849	4.94852		2.1084	-6.41291	1.19508	0.49012	8.8681	10.3791
C10orf10	0		0	2.31424	3.94996	2.30038	8.59566	7.63213		0	0.5026	1.9742	2.57195	4.61661	4.57509		0	3.11716	2.98691	2.14654	11.0849	10.2508
C10orf107	0		0	-1.26303	0.0028325	0.088886	2.82653	2.83762		0	0.85218	0.608701	0.419486	0.542445	0.345664		0	2.88631	2.55961	1.78541	3.168	2.3617
C10orf11	0		0	-2.46706	1.80239	1.41658	4.57166	5.73764		0	-1.50894	1.11232	0.354758	2.86902	3.52642		0	-1.25721	1.20842	2.4853	5.2125	5.6538
C10orf113	0		0	-2.26231	0.000254388	0.000232913	2.6412	2.65019		0	-2.20439	0.0197765	0.202456	0	0.238536		0	-1.12234	0.00507105	0.0272323	0	0
C10orf128	0		0	-2.13419	1.87552	2.25776	5.12938	5.8129		0	-1.28707	0.227853	0.937083	2.22872	2.46684		0	1.02166	1.14693	1.82578	3.9391	3.0842
C10orf25	0		0	-1.43617	1.17146	1.48492	3.42408	3.59675		0	-0.805339	0.184976	0.217409	1.24788	1.38262		0	2.24642	0.795479	0.697719	6.694	5.83535
C10orf35	0		0	2.62481	0.789241	0.634678	3.60985	2.97827		0	4.58254	0.543323	0.511589	1.9936	0.521577		0	4.6178	1.45647	3.68449	7.0848	4.40795
C10orf53	0		0	0.133281	0.000754408	0.000318601	2.41249	2.41829		NA	NA	0	0	0	0		0	-1.46804	0.00780125	0.0363881	0	0
C10orf55	0		0	-2.10284	0.00336883	0.00477257	2.86292	2.89161		0	-4.41051	0.0862327	0.207724	0.515081	1.01278		0	-2.20092	0.963365	2.96249	3.9605	4.72165
C10orf62	0		0	-1.12837	6.84002e-05	0.00386676	2.24356	2.24596		0	1.31109	0.205512	0.151857	0.459475	0.151207		0	4.13845	1.16062	0.37358	1.374	0.2103
C10orf67	0		0	-1.61437	0.010338	0.036615	2.99368	3.01456		0	-1.88402	0.00656586	0.00713662	0.175467	0.23098		0	-2.48289	0.567514	2.72047	0	0.92745
C10orf71	0		0	-0.839198	0.642269	2.06182	2.42724	2.42994		0	-1.05447	0.0418573	0.0566934	0.0342179	0.0900828		0	-2.30314	2.28883	12.0763	0	1.9653
C10orf76	0		0	-1.44713	0.26986	0.234875	5.948	6.10499		0	-1.92428	0.147993	0.0636027	3.12821	3.32789		0	-0.772165	0.205212	0.0959169	9.0116	9.2203
C10orf82	0		0	-0.607364	0.00265922	0.0367104	2.49277	2.49326		0	-1.38341	0.00627302	0.010749	0	0.0601466		0	-1.9753	0.677713	3.03328	0	0.92225
C10orf88	0		0.319671	-4.33818	0.691052	0.989419	3.85706	4.73319		0	-2.16735	0.0987675	0.0550347	2.29259	2.54068		0	-4.41693	0.216151	0.114493	7.1465	7.7248
C10orf90	0		0	0.397859	0.273246	0.18636	2.39562	2.39643		0	-2.89333	0.16363	0.181271	0.0586964	0.695939		0	-1.53803	4.40638	3.64595	1.4169	2.83115
C10orf91	0		0	-1.24266	0.00189945	0.00221178	2.68136	2.68064		0	-2.43233	0.000177262	0.0306549	0	0.0714974		0	-2.33985	0.175327	2.41962	0	0.4133
C10orf95	0		0	-0.137457	0.0560295	0.0329587	3.72034	3.77923		0	0.809753	0.0923299	0.101838	1.10529	0.904134		0	0.105817	0.760028	0.455607	1.1321	1.19895
C10orf99	0		0	1.97983	0.0322076	0.0534345	15.3719	15.3099		0	-0.431126	0.000851963	0.00109473	0	0		0	-0.234653	0.108566	0.45439	0	0
C11orf1	0		0	3.52735	1.40433	1.96757	6.58623	5.76994		0	2.58501	0.367422	0.572214	3.18508	2.23414		0	4.12778	0.396519	0.691611	7.5711	6.8765
C11orf16	0		0	-0.926849	0.136939	0.136758	3.91474	3.97244		0	2.13111	0.0568168	0.021179	0.535811	0.378428		0	0.400281	0.328576	0.195486	0	0.2103
C11orf21	0		0	-0.210306	0.008921	0.00753187	2.40904	2.41542		0	-0.748003	0.0628988	0.202094	0.466498	0.55087		0	-1.71717	2.46623	4.37253	3.5173	4.03535
C11orf24	0		0.895425	-4.7189	0.580772	0.499842	7.51946	8.32062		0	-3.06906	0.229307	0.104249	4.08296	4.49155		0	-2.65085	0.255526	0.705155	10.2091	11.0398
C11orf40	0		0	0.471452	6.10581e-05	6.95707e-05	2.05821	2.05812		0	1.67015	0.00681136	0.000621806	0	0		NA	NA	0	0	0	0
C11orf42	0		0	-0.307512	0.00010151	0.000215123	2.14496	2.14827		0	-0.444307	0.111569	0.154214	0.631953	0.600748		0	2.53245	0.379445	0.16546	0.475	0
C11orf45	0		0	-1.17865	0.00340401	0.0208727	2.6928	2.69999		0	-1.83861	0.143182	0.271677	0.982787	1.40395		0	-1.74476	1.2143	0.879196	4.8883	5.296
C11orf49	0		0	-3.64151	0.453606	0.529207	6.26339	6.61244		0	-0.0164608	0.167454	0.300921	3.74872	3.6839		0	-2.7322	0.332733	0.35731	8.4928	8.8327
C11orf52	0		0	0.640344	0.0926564	0.0303223	2.46535	2.45987		0	1.61099	0.294055	0.62772	0.944738	0.284778		0	4.16287	0.775381	4.07209	5.1968	2.8081
C11orf53	0		0	-1.83763	0.000369904	0.00216638	2.30536	2.31224		0	-0.490644	0.0134173	0.0179052	0.0758711	0.0619224		0	-2.16933	0.842532	3.61138	0	0.58325
C11orf54	0		0	0.499345	0.566002	0.73358	8.79644	8.76726		0	3.17781	0.15399	0.178705	3.85698	3.39627		0	0.680954	0.284827	0.364742	8.4756	8.4084
C11orf57	0		0	-2.67891	1.07943	0.581246	6.81901	7.05634		0	-1.2592	0.17698	0.327886	3.67402	3.71276		0	-0.306034	0.160303	0.178846	9.3714	9.27245
C11orf58	0		0	-1.70658	0.466679	0.273317	11.132	11.3232		0	3.02189	0.128734	0.159904	5.57706	5.03041		0	0.762161	0.172908	0.140839	11.6109	11.5176
C11orf63	0		0	-2.27398	0.360631	0.863503	2.45596	2.50989		0	-2.57358	0.303377	0.659134	1.2105	2.27193		0	-3.29933	2.2123	1.80061	5.4653	6.263
C11orf65	0		0	-0.512844	0.000360643	0.000447014	2.48283	2.48718		0	0.369077	0.153948	0.316074	0.763511	0.580684		0	-0.922973	0.442339	0.571694	2.1954	2.49275
C11orf68	0		0	-0.598432	0.321896	0.322627	7.51381	7.61521		0	0.0552008	0.114744	0.529751	4.5035	4.40437		0	0.252467	0.231593	0.346613	10.5572	10.2243
C11orf70	0		0	0.73983	1.57827	2.61362	3.15512	3.01485		0	3.85548	0.35127	0.165374	2.58362	1.92652		0	4.27359	0.883924	2.55047	5.9063	4.416
C11orf71	0		0.390523	4.49834	2.29385	0.818503	4.88388	3.71064		0	0.918258	0.326334	0.69577	3.13935	2.95534		0.629723	5.19085	0.508683	0.565329	8.1284	6.95395
C11orf74	0		0	-0.284629	0.388068	0.638087	7.42431	7.42586		0	2.93301	0.218782	0.149804	4.05259	3.45484		0	0.218783	0.342185	0.214759	7.7792	7.58815
C11orf80	0		1.68257	5.14379	1.69018	2.22736	6.84951	5.15941		0	3.76701	0.117185	0.329319	3.30094	2.39553		0	3.58304	0.336581	0.612802	7.239	6.61125
C11orf84	0		0	-0.798667	0.15227	0.186517	5.62341	5.68416		0	-0.313826	0.0949776	0.231994	3.42792	3.53237		0	-1.01189	0.144351	0.270052	9.2654	9.40925
C11orf86	0		0	0.118757	0.044514	0.0307366	2.34343	2.34906		0	0.230888	0.00458228	0.00422875	0	0		0	1.00299	0.653629	0.212086	0	0
C11orf87	0		0	-1.96625	0.0779932	0.743735	2.92335	2.95143		0	-2.38009	0.137316	0.926693	0.0521789	0.620371		0	-1.76466	3.46443	6.78449	1.9633	2.8081
C11orf88	0		0	-0.438854	0.000209093	0.000265039	2.11564	2.11778		0	-0.248491	0.0204435	0.0290372	0.130966	0.167001		0	-4.4596	0.584104	1.37942	0.8084	2.03015
C11orf94	0		0	-2.38993	0.000850054	0.00732296	2.31097	2.32321		0	0.558921	0.449828	0.534242	1.20241	1.17676		0	0.00335993	0.0955607	0.0917907	0	0
C11orf95	1		12.5872	-10.9923	0.926477	0.621375	6.04893	7.84488		0	-2.93638	0.362691	0.451358	2.63787	3.13702		0	-4.29101	0.341107	0.819292	8.4439	9.3772
C12orf10	0		1.19905	-4.95197	0.810717	0.461109	5.52226	6.37696		0	-1.73997	0.239088	0.191128	3.87321	4.26109		0	-3.08184	0.530889	0.406213	9.209	9.8112
C12orf29	0		0	-2.37868	1.15971	0.474666	7.8292	8.13243		0	1.32178	0.154181	0.147834	3.47746	3.14553		0	-1.94451	0.331035	0.992629	8.5559	8.4963
C12orf4	0		0	0.840475	0.493743	0.5698	8.1492	7.98864		0	1.9858	0.134964	0.197584	3.73686	3.5029		0	0.569416	0.30158	0.257464	8.9892	8.8287
C12orf40	0		0	-2.12069	0.0011512	0.00218917	2.7324	2.74715		0	-1.14112	0.00100812	0.489228	0.0268063	0.0357108		0	-1.18853	0.134838	2.64985	0	0
C12orf42	0		0	-1.34711	0.000179357	0.000212156	2.34646	2.34972		0	-0.038767	0.0135444	0.00972175	0.0796197	0.0966458		0	-2.32452	0.289576	3.24912	0	0.82475
C12orf43	0		0	-0.177111	0.486824	0.394533	6.12036	6.01449		0	0.443224	0.0795019	0.0929231	2.83241	2.74071		0	-0.389879	0.18785	0.17972	8.1491	8.0363
C12orf45	0		0	-0.928854	0.405354	0.534647	6.55276	6.62758		0	-0.296204	0.1155	0.463726	3.79464	3.56229		0	-3.36333	0.291453	0.461013	6.9751	7.2221
C12orf49	1		2.99333	-5.90019	0.440668	0.403065	3.61307	4.50292		1.15989	-6.47659	0.138117	0.276442	2.53488	3.63523		5.03023	-8.96435	0.261706	0.202324	7.3942	8.49995
C12orf50	0		0	-0.999213	0.000152628	0.024198	2.0404	2.04062		0	-0.0728975	0.00550862	0.00459938	0.0497669	0.0629507		0	-0.34614	0.814319	0.480486	0.4832	0.63825
C12orf54	1		5.81352	8.57336	4.5274	0.0308766	5.70159	3.06948		2.5948	8.22034	1.58462	0.235519	2.87671	0.096518		5.24314	9.16238	4.82974	1.43739	5.4592	0.63825
C12orf56	0		0	-1.13282	6.24506e-05	0.408328	2.17335	2.17481		0	-1.73867	0.0101463	0.283183	0.0751575	0.169317		0	-2.56585	0.119585	3.36277	0	0.49765
C12orf57	0		0	2.97341	0.397447	0.696854	12.1282	11.5919		0	3.08433	0.223516	0.423214	7.62993	7.03859		0	1.24119	0.38343	0.838381	11.5023	11.2689
C12orf60	0		0	-0.427063	0.192946	0.391589	2.77656	2.77427		0	1.38222	0.274232	0.074949	0.866106	0.799899		0	1.64266	0.775701	0.739257	4.1505	3.7805
C12orf65	1		3.36571	6.11152	0.583963	0.500449	7.17555	6.15323		0	4.0715	0.0421611	0.0746676	3.86414	3.49991		0	4.48182	0.220494	0.171182	9.104	8.43025
C12orf66	0		0	0.835903	0.67165	0.563303	4.4674	4.44871		0	-2.20366	0.151966	0.215957	2.28471	2.63744		0	-2.01248	0.3656	0.531449	5.6724	6.09355
C12orf73	0		0	-0.308066	0.631197	1.08025	5.61661	5.63458		0	-0.441206	0.120067	0.0880469	2.31927	2.33158		0	-2.07822	0.197368	0.351607	6.6135	6.9215
C12orf74	0		0	-1.44769	0.00180546	0.00217864	2.64715	2.65662		0	-2.05692	0.00313763	0.0119028	0.0411448	0.0727778		0	-2.34175	0.0163373	0.316283	0	0
C12orf75	0		0	0.689485	2.79847	2.53906	8.83539	8.57359		0	1.4213	0.980943	0.813878	5.3436	4.99252		0	1.96902	1.21136	3.06682	10.2213	8.81475
C12orf76	0		0.122436	-4.23781	0.795526	0.686489	6.43843	7.09329		0	-1.42593	0.100474	0.144429	1.84878	1.98837		0	-3.74544	0.283708	0.679154	6.4822	7.2029
C12orf77	0		0	1.72587	0.427762	0.000439264	2.53648	2.5396		0	1.76987	0.364303	0.0505857	1.15902	1.1622		0	3.60245	3.55254	1.41739	2.3406	0
C14orf1	0		0	1.13994	0.607828	1.05406	8.27013	8.03464		0	0.158447	0.238081	0.502897	3.52321	3.4712		0	-0.915092	0.2944	0.692127	9.2063	9.17185
C14orf105	0		0	-1.25053	0.00750652	0.0125359	2.96924	2.98391		0	0.0912492	0.103436	0.071321	1.07954	1.08447		0	2.28295	2.44639	0.688042	0.5466	0
C14orf119	0		0	-0.287058	0.186518	0.182146	9.82641	9.8801		0	0.317516	0.102341	0.257418	4.21858	4.19091		0	-2.87225	0.157675	0.325749	10.0388	10.4876
C14orf132	0		0	-0.544506	6.39913	2.49322	9.33245	9.08756		0	3.11714	2.32821	0.303941	5.12514	3.69801		0	2.82987	3.09974	3.14442	11.8729	10.475
C14orf159	1		4.16926	6.5445	0.552277	0.455767	8.99708	7.86275		0	3.55994	0.215311	0.21035	4.79727	4.1103		0	3.6697	0.303461	0.962988	10.5842	9.44605
C14orf166	0		0	-0.552619	0.109104	0.195759	11.834	11.8071		0	0.665155	0.0609691	0.211111	6.3223	6.28603		0	-2.86578	0.235842	0.411059	11.0316	11.32
C14orf178	0		0	0.314777	0.000450415	0.000320109	2.25668	2.26152		0	0.714316	0.0909963	0.0845237	2.0149	1.85818		0	1.69464	0.470262	0.687335	1.3994	0.9768
C14orf180	0		0	1.13845	0.916061	0.0310226	2.88594	2.89524		0	2.04499	1.54065	1.49277	1.14784	0.0200871		1.61211	6.00112	11.6213	2.25197	5.3214	0.2416
C14orf2	0		0	-0.641673	0.175388	0.205337	11.7164	11.7369		0	0.667317	0.109478	0.317731	6.35671	6.25686		0	-3.38929	0.225573	0.495202	9.715	10.0532
C14orf28	1		9.86643	9.28881	1.07453	1.14439	7.24522	5.27001		4.44788	10.841	0.200613	0.103735	3.19506	1.73989		0.916645	5.4276	0.28514	0.551235	7.6949	6.68885
C14orf37	1		3.17297	-6.04198	0.344998	1.77636	3.75366	4.61849		0	-1.65456	0.445413	1.27028	1.78726	2.72899		0	-1.79889	1.80239	4.96423	6.1948	7.6163
C14orf39	0		0	-2.37823	0.000971273	0.0506988	2.63873	2.66088		0	-1.95178	0.0213005	0.0244914	0.0152548	0.11296		1.46618	-5.88047	0.555833	4.16042	0	2.91865
C14orf79	0		0	-2.21075	0.0573271	0.0856674	2.81984	2.84289		0	-1.70107	0.119071	0.241918	2.12649	2.25923		0	-2.8374	0.300132	0.228678	7.0365	7.55135
C14orf80	0		0	-0.809302	0.292641	0.39159	4.71148	4.71166		0	-2.05603	0.44833	0.344477	2.3385	3.08293		0	-3.39082	0.645385	0.815887	7.7188	8.25765
C14orf93	0		0	-0.192264	0.273554	0.259655	2.72701	2.74979		0	-0.803209	0.116895	0.0578812	2.35419	2.3953		0	-0.610737	0.259312	0.407565	7.4472	7.3728
C15orf32	0		0	-0.855857	0.000543297	0.000504654	2.55051	2.55672		0	-1.13409	0.00115747	0.00140776	0	0		0	-2.02252	0.0654544	0.307492	0	0
C15orf39	0		0	-0.343243	0.885959	0.832263	6.24748	6.17219		0	1.52549	0.322386	0.461858	3.79841	3.36845		0	4.53104	0.303695	0.589996	10.8482	10.0291
C15orf40	0		0	3.74606	0.907598	1.74246	7.24188	6.33584		0	0.849431	0.0882438	0.0816435	4.23557	4.25564		0	2.14719	0.19329	0.322381	8.1821	7.6687
C15orf41	1		11.1501	10.0015	0.607083	0.549882	8.41634	6.86102		2.57266	8.1918	0.289319	0.150257	4.67749	3.44294		7.39978	11.2974	0.201197	0.517395	9.433	7.4157
C15orf48	0		0	-1.29607	2.66886	4.52681	3.18947	3.32945		0	-2.01721	0.801579	1.27047	1.10602	1.85048		0	-2.07827	1.74269	4.32894	3.8607	5.08765
C15orf52	1		21.1863	15.3644	1.36618	1.14156	7.82523	3.55355		3.90628	10.0241	0.342125	0.430088	3.39508	1.02404		4.70497	8.66525	0.847088	3.17165	10.7514	6.6873
C15orf54	0		0	0.71135	0.000197397	0.000251526	1.98252	1.98116		0	-1.2772	0.0394363	0.0826442	0.224374	0.338556		0	-2.63003	0.491575	1.27916	0.5925	1.4746
C15orf56	0		0	-0.924083	0.000976612	0.128696	2.31186	2.31489		0	1.80601	0.15535	0.0424071	0.258204	0.115065		0	3.51469	2.88049	1.50483	2.6093	1.1883
C15orf57	0		0	1.49607	0.358426	0.216007	6.00213	5.93743		0	-1.38014	0.130118	0.055463	3.23457	3.4389		0	-1.25715	0.225551	0.215437	8.3464	8.54695
C15orf59	0		0	-1.81293	0.258797	0.551887	2.7582	2.79724		0	-0.941205	0.278334	0.268852	1.18839	1.69161		0	1.10212	2.74432	3.31179	5.5188	5.25895
C15orf61	0		1.88074	-5.40927	1.36003	0.585424	8.4897	9.38935		0	-2.97764	0.131424	0.204218	2.48651	2.7711		1.03747	-5.52722	0.243839	0.593789	6.7644	7.97595
C15orf62	0		0	1.11368	0.000855286	8.49622e-05	2.32599	2.32715		0	3.16794	0.111955	0.0915408	2.30222	1.87152		5.51518	9.41852	0.454046	0.794407	6.3609	4.4481
C16orf45	0		0	3.65287	1.76562	2.22795	8.84308	7.89183		0	4.21961	0.378945	1.21102	4.69508	3.46966		2.64731	6.86526	0.570171	1.12423	10.4979	8.61965
C16orf46	0		0	-2.55172	0.179186	0.606041	3.41583	3.56163		0	-2.51992	0.0438377	0.23968	0.68819	0.944285		0	-2.6291	0.317546	0.682471	4.3416	4.5799
C16orf52	0		0	-2.02046	0.56109	0.256806	9.55704	9.87215		0	1.19444	0.0732816	0.135057	3.34041	3.05446		0	1.88513	0.092501	0.379141	8.5227	8.22715
C16orf54	0		0	-0.402588	0.809845	0.71588	2.99836	3.00133		0	-0.510784	0.145668	0.30492	1.14148	1.26968		0	-1.65599	2.55328	4.69565	4.5499	4.5289
C16orf58	0		0	-1.0849	0.683905	0.330577	6.40048	6.63525		0	-0.0379554	0.173797	0.541669	4.71515	4.75382		0	0.917358	0.151482	0.198248	11.2681	11.1233
C16orf59	0		0	0.563052	0.480604	0.323551	2.81294	2.83833		0	-0.645986	0.671297	0.735286	2.1319	2.64205		0	-1.5126	1.19596	0.790263	7.3129	7.4588
C16orf62	0		0	1.06695	0.597536	0.300523	8.13837	7.99334		0	1.06962	0.186879	0.21422	4.24373	4.12425		0	2.39075	0.129178	0.112051	10.3836	10.1239
C16orf70	0		0.361844	-4.38287	0.248015	0.237572	4.94415	5.44304		0	-2.16826	0.176211	0.332578	2.92264	3.4165		0	-2.30998	0.158913	0.100628	8.5926	8.87855
C16orf71	0		0	-1.89229	0.0107735	0.0138397	3.36075	3.39808		0	0.998031	0.099721	0.133414	0.875399	0.725674		0	2.89103	0.50476	1.61127	4.2799	3.05785
C16orf72	0		0	-2.62178	0.201157	0.266542	9.42278	9.63624		0	0.561814	0.0881377	0.163901	4.70461	4.46411		0	-3.85908	0.143823	0.086155	9.9298	10.2509
C16orf74	0		0	-1.53523	0.168065	0.39092	3.86325	3.91354		0	-2.80494	0.308024	0.388109	0.703128	1.39666		0	-2.59946	1.77962	1.71858	3.5269	4.7088
C16orf78	0		0	0.905907	8.99755e-05	0.000215283	2.49455	2.49316		0	-1.13997	0.00280761	0.0318797	0	0		0	-1	0	0.0122409	0	0
C16orf82	0		0	-0.757883	0.00223971	0.00287351	2.46429	2.46617		0	0.211711	9.741e-05	5.57524e-05	0	0		0	-0.81474	0.0319741	0.0945627	0	0
C16orf86	0		0	-1.65715	0.14922	0.243438	3.97907	4.0499		0	-1.12464	0.245087	0.151992	1.64983	1.54913		0	-0.227807	1.00398	1.58077	6.134	6.45835
C16orf87	0		0	-0.0656863	1.32243	1.19443	3.89099	3.89063		0	0.924767	0.176329	0.326863	2.96355	2.70449		0	-4.37142	0.285264	0.254323	6.5268	7.21925
C16orf89	0		0	4.12386	4.43963	0.149631	2.23799	2.22413		0	2.11921	3.44056	2.57005	2.52858	0.485497		0	3.87973	13.077	5.67589	6.1231	2.81945
C16orf91	0		0	0.820663	0.289754	0.412842	7.0264	6.95179		0	1.08123	0.321071	0.194501	3.49001	3.23698		0	-0.330498	0.13132	0.377814	7.9675	8.11525
C16orf92	0		0	-1.9805	0.000311113	0.00035461	2.45036	2.46004		0	2.61255	0.0579989	0.0150625	0.186456	0		0	1.07529	0.278983	0.0865983	0	0
C17orf100	0		0	-2.7602	0.36998	0.96556	3.22138	3.3608		0	-3.52637	0.110461	0.143719	1.03792	1.53335		0	-1.76005	0.538589	0.862895	5.4527	6.0416
C17orf105	0		0	-1.01109	0.000608346	0.000783221	2.55087	2.55692		0	-0.0904828	0.0201114	0.0223963	0.102435	0.0926921		0	1.14622	0.0765323	0.056807	0	0
C17orf47	0		0	-1.30375	7.34234e-05	8.09503e-05	2.21815	2.2204		0	-1.57243	0.131935	0.443954	0.310885	0.57147		0	-0.591987	1.20361	1.40962	1.3463	1.6871
C17orf49	1		7.47978	-8.17308	0.914755	0.873795	7.66577	9.26033		0	-4.8001	0.0675618	0.201892	4.21529	4.88444		4.34293	-8.33765	0.364642	0.609532	9.1084	10.7115
C17orf50	0		0	-1.9209	9.63808e-05	0.000648974	2.28668	2.28983		0	1.3651	0.137005	0.0843258	0.20781	0.128548		0	1.0681	0.456464	0.303242	0	0
C17orf51	0		0	-0.494456	0.444748	0.811099	7.14938	7.11086		0	-2.18242	0.886716	0.457135	2.75911	3.25218		0	-0.696029	1.01888	1.60149	9.0091	9.21205
C17orf53	0		0	-0.839536	0.11579	0.122633	4.50088	4.55332		0	-2.50458	0.154903	0.197331	1.58072	1.95017		0	-2.68346	0.437974	0.667588	6.7526	7.2628
C17orf58	0		0	-2.57833	1.02872	3.58856	8.15445	8.46295		0	-1.63986	0.351021	0.739487	2.92691	3.17262		0	-0.978602	0.583688	0.431723	7.4431	7.6267
C17orf62	0		0.966093	-4.75176	0.703699	0.675387	7.25378	8.06508		0	-1.66576	0.253024	0.180834	4.38425	4.62983		0	-2.3355	0.245566	0.304045	10.2702	10.6951
C17orf64	0		0	-0.288406	2.68206e-05	0.0001117	2.06661	2.06754		0	-0.787932	0.0512339	0.111659	0.0577416	0.0648373		0	-1.36105	0.671625	1.26686	0.7028	1.32045
C17orf67	0		0	-2.07711	0.0638199	0.111422	2.48648	2.52111		0	-2.29968	0.250405	0.236732	0.902123	1.55934		0	-2.91803	1.31301	0.70869	3.7189	4.54095
C17orf74	0		0	-0.802475	0.000140309	0.00021169	2.24152	2.24339		0	-0.647624	0.00110192	0.00726257	0	0		0	0.336118	1.29151	0.521783	0.3956	0
C17orf75	0		0	3.02746	0.712387	0.577474	5.01022	4.5156		0	3.32293	0.0619475	0.0675012	3.34622	3.07997		0	1.88634	0.132659	0.456698	7.9258	7.64575
C17orf77	0		0	-1.8118	0.0100927	0.0384631	3.06094	3.08366		0	-0.385377	0.0113533	0.017781	0.491075	0.563869		0	1.46201	0.0705506	0	0	0
C17orf78	0		0	-0.647354	0.000110054	0.000116192	2.20821	2.21123		0	0.0633094	0.13354	0.154467	1.14622	1.20839		0	1.51466	0.342694	0.539958	0.4647	0
C17orf80	0		0	1.24579	0.424291	0.347294	7.53422	7.39121		0	1.82531	0.199981	0.0996351	3.86742	3.62601		0	2.09694	0.204459	0.414041	9.4373	9.2388
C17orf82	0		0	0.0948799	0.000300992	0.000334412	2.28189	2.2846		0	4.42758	0.364955	0.130393	1.82374	1.12552		0	4.06509	0.959471	2.64293	4.8469	3.5078
C17orf97	0		0	-2.07395	0.457595	0.876814	3.53609	3.67254		0	-1.60433	0.410062	0.418022	0.92494	1.58795		0	-1.69695	1.46907	1.17324	5.428	6.1171
C17orf98	0		0	-1.08663	0.0158243	0.0363336	2.93342	2.94943		0	-0.242544	0.0388659	0.0254812	0	0.145908		0	-1.32102	0.0458001	0.195739	0	0
C17orf99	0		0	-0.674163	0.0425042	0.134304	2.48395	2.48732		0	-1.38073	0.00699693	0.016736	0.0601889	0.0782723		0	-1.16108	0.254528	1.71254	0	0.2416
C18orf21	0		0	-0.838552	0.320471	0.486306	7.9768	8.04537		0	0.541562	0.117861	0.300386	3.78487	3.85987		0	-0.870318	0.20433	0.375049	7.9393	7.98005
C18orf25	0		0	3.43509	0.454875	0.370418	8.45413	8.05654		0	2.15191	0.126478	0.260636	4.046	3.64754		0	4.64474	0.19191	0.382556	9.3944	8.95935
C18orf32	0		0	-0.618203	0.354616	0.26042	9.40573	9.49066		0	2.86426	0.19887	0.126245	4.86053	4.283		0	0.259892	0.135248	0.169765	9.7927	9.8339
C18orf54	0		0	-0.0788129	1.71905	1.64844	7.05536	7.24976		0	-0.478211	0.123345	0.361961	2.35514	2.62214		0	-0.481159	0.608218	0.496591	7.6489	7.58095
C18orf8	0		0	0.938969	0.495013	0.479946	7.57542	7.13094		0	0.064685	0.123685	0.303109	4.02906	4.03312		0	3.15521	0.182448	0.241332	9.0594	8.76395
C19orf12	0		0	-0.931721	0.486326	0.792132	8.5515	8.62951		0	-2.0949	0.0794696	0.177515	3.3872	3.59535		0	-2.56257	0.203482	0.826624	9.4812	10.0952
C19orf18	0		0	2.59778	0.24391	0.0563374	2.6221	2.60493		0	3.50459	0.285381	0.155201	1.85228	1.09797		0	1.71995	1.02669	1.39547	3.6603	3.20255
C19orf24	0		0	-3.8259	0.517877	0.49919	6.57091	6.91938		0	-3.67192	0.260879	0.222128	3.70694	4.46718		0	-3.35705	0.394022	0.831847	8.9832	9.54995
C19orf25	0		0	1.30566	0.917854	0.68777	5.82695	5.45582		0	1.23918	0.297881	0.143521	3.45049	3.3918		0	-0.138825	0.560329	0.255353	9.3508	9.3338
C19orf33	0		0	-0.990363	0.268558	0.559735	2.42583	2.42749		0	0.378066	0.0490668	0.0617823	0.200457	0		0	-0.375077	1.03294	2.55222	1.8291	1.99705
C19orf43	0		0	-1.83093	0.24814	0.302006	10.552	10.6763		0	0.790362	0.0660322	0.412919	6.41863	6.23123		0	-0.922821	0.262542	0.579229	10.9364	10.8893
C19orf44	0		0	0.835105	0.0820132	0.0532471	2.90147	2.90159		0	0.862036	0.134221	0.316569	2.25533	1.91666		0.513916	5.09523	0.231204	0.237805	8.288	7.53375
C19orf45	0		0	-1.35502	0.000854963	0.0107796	2.17378	2.18181		0	-1.10452	0.000957967	0.00536715	0.0138108	0.0426974		0	0.763104	0.678181	0.23139	0	0
C19orf47	0		0	0.151654	0.0850183	0.055751	4.52941	4.53445		0	0.602389	0.137092	0.152458	3.11439	2.92373		0	-0.72325	0.253892	0.391759	8.6923	8.9208
C19orf48	0		0	-1.00521	1.13039	0.7126	6.86486	6.87744		0	-1.66213	0.405008	0.540906	4.22507	4.95952		0	-3.74961	0.414646	0.809936	9.672	10.3906
C19orf53	0		0	0.841998	0.307496	0.32013	10.3403	10.1545		0	1.21355	0.201239	0.320012	5.42502	5.39139		0	-1.25894	0.249919	0.610441	10.587	10.6515
C19orf54	0		0	1.76345	1.06897	0.9001	6.55821	6.45179		0	-2.48674	0.135614	0.130871	1.78875	2.11884		0	1.32012	0.335115	0.375444	8.6272	8.30535
C19orf57	0		0	3.27222	0.21787	0.098965	2.2106	2.13843		0	1.93923	0.431043	1.25411	2.73911	1.7329		8.42485	12.4068	0.714215	0.512886	8.2763	5.67315
C19orf60	0		0	-3.36531	0.266646	0.377884	7.72067	8.10008		0	-1.46654	0.346098	0.137075	4.52836	4.69406		0	-2.2246	0.500334	0.801849	8.9955	9.3057
C19orf66	0		0	1.9158	1.67999	0.808516	8.44135	7.80371		0	1.4587	0.290325	0.212408	4.09198	3.74668		0	3.87739	0.313374	0.746404	10.125	9.55415
C19orf70	0		0.146605	4.25133	0.473697	0.421587	9.62744	9.20833		0	2.8919	0.176191	0.367815	5.36138	4.55174		0	0.667323	0.319768	0.811531	10.1839	9.91675
C19orf73	0		0	-0.0205114	6.18787e-05	5.82286e-05	2.07765	2.07637		0	-1.59934	0.241475	0.091458	0.69107	0.937865		0	-3.20631	0.683235	1.1063	2.8811	3.8001
C1D	0		0	-1.41017	0.409566	0.30179	8.52745	8.75013		0	0.0686205	0.0598684	0.13811	4.08853	4.0854		0	-2.94767	0.316085	0.319216	7.485	7.83455
C1GALT1	0		0	-2.28455	0.591758	1.88214	6.33464	7.06608		0	-1.9417	0.220229	0.536382	3.41904	3.75484		0	-1.73755	0.480109	0.871594	7.7127	8.53145
C1GALT1C1	0		1.30657	4.92331	0.331903	0.610265	8.81357	8.2788		0	1.65191	0.284742	0.215185	4.2116	4.16993		0	1.54206	0.244091	0.813355	9.0847	8.51235
C1orf100	0		0	1.11437	1.48596e-05	1.46067e-05	1.86145	1.85993		0	0.230193	0.0970836	0.0283059	0.194346	0.343108		0	-1.40503	0.0133121	0.0830588	0	0
C1orf101	0		0	-0.827484	0.0018642	0.000876977	2.88847	2.90359		0	1.96729	0.156909	0.102208	1.2373	1.08442		0	3.60455	0.508054	0.9461	3.7069	2.73755
C1orf105	0		0	-0.102305	2.33575e-05	9.45105e-05	1.99118	1.99139		0	-1.06023	0.0255655	0.0427378	0.189772	0.320185		0	-1.42306	0.0785166	2.07795	0	0
C1orf106	0		0	1.90991	1.62849	0.619083	2.52127	2.51294		0	1.45128	0.386524	0.141738	1.0814	0.978381		0	1.57612	4.73594	2.69589	4.2673	3.34835
C1orf109	0		0	-0.616539	0.157408	0.30935	6.29189	6.31044		0	0.927062	0.0543761	0.110675	3.34028	3.31894		0	2.15634	0.13225	0.566835	8.639	8.34415
C1orf112	0		0	-2.95129	0.884912	1.50382	4.7777	5.33504		0	-1.0793	0.126236	0.160817	3.15279	3.31681		0	-1.34811	0.386158	0.511154	7.4888	7.59905
C1orf115	0		0	1.40629	3.37179	4.15581	4.06776	3.10158		0	2.48054	0.90663	0.57121	2.25666	1.90557		0	2.02495	1.7468	3.59654	8.1603	7.7554
C1orf116	0		0	-1.58744	9.7379e-05	0.000327515	2.21811	2.21916		0	0.897312	0.00324181	0.00203978	0.0754113	0.0732595		0	-1.24226	0.875989	1.02691	1.8689	2.1144
C1orf122	0		0	0.401609	0.484111	0.658198	8.86566	8.91336		0	0.672459	0.140317	0.29902	4.91728	4.85373		0	-0.354344	0.292743	0.653151	9.9887	9.96315
C1orf123	0		0	0.766177	0.302371	0.481891	9.17256	9.11467		0	1.12344	0.123813	0.252583	5.13563	4.88797		0	0.292116	0.205646	0.498804	10.1271	10.0319
C1orf127	0		0	0.431701	0.0344045	0.0276267	2.08056	2.08161		0	-2.2418	0.0122856	0.0531552	0.182193	0.283332		0	-2.13892	1.29557	1.91325	2.961	3.46
C1orf131	0		0	1.26837	0.612903	0.757897	8.28839	8.094		0	0.945092	0.0647949	0.0610659	2.99978	2.83755		0	-0.373234	0.219813	0.38151	7.6681	7.92085
C1orf158	0		0	-2.26091	5.73093e-05	0.000133842	2.14807	2.15218		0	-2.2526	0.000278616	0.025091	0	0		0	-1.1261	0.0981429	0.769631	0	0
C1orf159	0		0	-2.17028	0.0097279	0.0162854	2.48219	2.50922		0.822948	-6.09378	0.100494	0.112497	2.00734	2.73789		0.759185	-5.29754	0.279125	0.445918	6.8411	7.7165
C1orf162	0		0	-2.98159	3.09856	3.79174	5.17059	6.9308		0	-1.88996	0.595738	0.633118	2.96055	3.72153		0	-3.53441	1.98893	1.74582	6.779	7.90565
C1orf168	0		0	0.824259	0.150276	0.00244015	2.74519	2.75686		0	2.156	0.133944	0.0276646	0.199757	0.0626958		0	2.60336	1.4993	0.371209	1.0117	0.64325
C1orf174	0		0.788458	-4.65149	0.503229	0.446136	8.39447	8.94988		0	-4.98988	0.0964194	0.101304	3.69068	4.31517		0.481269	-5.06827	0.201728	0.372574	8.4516	9.38605
C1orf186	0		0	-1.40269	0.137201	0.265686	2.73829	2.7817		0	-0.0544209	0.390949	0.237551	1.26296	1.18126		0	3.18757	4.95693	2.11107	3.7031	1.5595
C1orf194	0		0	-0.166394	0.000852687	0.00143962	2.17511	2.17638		0	-2.38165	0.0397554	0.0358318	0.33611	0.542877		0	0.92954	0.499132	0.461625	0.4801	0
C1orf198	0		0	1.64412	0.840754	1.90583	8.95487	8.43483		0	0.182237	0.404017	0.781711	4.28996	3.93354		0	0.372453	0.758562	0.810599	10.5239	10.4193
C1orf204	0		0	-1.50435	0.0479629	0.285112	2.33674	2.34623		0	-2.44704	0.167375	0.416146	1.98158	2.30606		0	0.0736874	0.868064	0.715996	5.4399	5.1977
C1orf21	1		2.43437	5.54847	0.999691	1.88524	9.69965	8.2615		0	3.97512	0.316329	0.504729	4.14764	2.90144		0	4.57898	0.313527	2.67714	11.3278	9.8074
C1orf210	0		0	-2.43306	0.00132758	0.00266563	2.96076	2.97171		0	-0.62652	0.0406448	0.0635068	1.1919	1.20899		0	2.21306	0.515243	0.338184	0.8631	0.2103
C1orf216	0		0	0.346283	0.513646	0.761995	7.40663	7.42067		0	1.13516	0.158045	0.173439	4.02309	3.96283		0	1.95696	0.298315	0.297398	10.1483	9.97825
C1orf226	1		4.64489	7.42133	2.78998	0.354086	4.47192	2.05256		0.0175164	5.20934	0.58969	1.10846	3.24696	0.830267		3.77965	7.83845	1.28267	3.70372	9.4066	5.6245
C1orf228	0		0	-0.386518	0.112726	0.0370227	3.16039	3.19039		0	-1.91909	0.206055	0.435262	0.645739	1.20686		0	-1.13782	0.943661	1.87588	3.0717	3.4783
C1orf27	0		0	-1.83192	0.526591	0.397759	8.15852	8.29364		0	3.15853	0.0300467	0.0547411	3.63719	3.37518		0	0.893854	0.145137	0.304761	8.7171	8.62685
C1orf35	0		0	2.40208	0.25692	0.495529	6.26857	5.81262		0	4.06365	0.106817	0.103222	3.54619	3.02266		0	2.63882	0.283068	0.181437	8.5828	8.31395
C1orf43	0		0	-1.13467	0.110353	0.171312	12.0425	12.1297		0	1.1529	0.0754333	0.0477778	6.23448	6.24307		0	-0.564026	0.122011	0.0439473	11.8982	11.9622
C1orf50	0		0	-3.56627	0.25975	0.509913	6.11229	6.45531		0	0.296797	0.0294413	0.100866	3.25074	3.28729		0	-2.18076	0.162177	0.460565	7.2246	7.3686
C1orf52	0		0	-3.84801	0.150099	0.426108	9.2829	9.70145		0	-2.87204	0.0962419	0.126086	3.01342	3.33314		0	-2.63825	0.133912	0.360878	8.438	8.72025
C1orf53	0		0	-2.12194	2.13138	3.15104	3.10758	3.51451		0	-3.53053	0.433408	0.395364	1.1466	1.93165		1.06414	-5.54925	1.22901	1.98153	3.6068	6.0603
C1orf54	0		0	2.20345	1.24166	1.97295	10.4576	9.75469		0	3.50803	0.714861	0.520006	5.73244	4.74662		0	3.74804	0.591205	1.17117	9.1831	8.22795
C1orf56	0		0	-3.37666	0.364367	0.688448	4.87287	5.32762		0	1.52895	0.108708	0.186562	2.721	2.65899		0	1.95024	0.400906	0.484011	7.8788	7.3976
C1orf61	0		0	0.240476	0.739296	0.977368	2.8624	2.86362		0	3.32092	0.537092	0.0593633	0.57657	0.211818		0.253143	4.8789	2.67396	3.3828	4.4272	1.22215
C1orf64	0		0	0.474693	0.0647685	0.00358978	2.58507	2.59348		0	2.41487	0.00309175	0	0	0		0	-0.373412	0.28673	0.376196	0	0
C1orf68	0		0	-0.395074	0.000434664	0.000263964	2.27766	2.28249		0	1.23293	0.00579331	0.000215192	0	0		0	1.95527	0.0397179	0	0	0
C1orf74	0		0	1.39248	0.0695452	0.0353867	2.78416	2.78846		0	2.11448	0.160548	0.135495	1.84933	1.47923		0	2.52106	0.520677	0.256809	6.4066	5.81075
C1orf87	0		0	-1.29252	0.000163836	0.000158928	2.32141	2.32485		0	-0.566691	0.00130336	0.00266474	0	0.0157054		0	-1.09112	0.482108	1.19333	0.3956	0.2103
C1orf94	0		0	-0.459085	0.226348	0.672596	2.35213	2.3533		0	2.75227	0.74616	0.00680364	0.0834899	0.0280819		0	3.85747	5.65249	0.951618	1.9786	0.2347
C1QA	0		0	-1.67581	3.56251	5.27677	9.55756	10.568		0	-2.44041	0.868625	1.01175	6.08182	6.90764		0	-3.3434	2.31243	2.41499	11.2192	12.4069
C1QB	0		0	-1.56243	3.60769	6.1182	9.33423	10.4824		0	-2.65423	1.08398	1.17486	5.80919	6.64817		0	-3.91762	2.45581	2.19719	11.0728	12.4512
C1QBP	1		4.85731	-6.84953	0.533181	0.547374	8.94603	10.0071		0.181167	-5.38652	0.0826249	0.344846	4.36847	5.36309		3.26186	-7.38872	0.208639	0.509877	9.386	10.6807
C1QC	0		0	-1.74477	3.90512	4.3682	10.0718	11.1226		0	-3.08346	0.723936	0.910672	5.94127	6.92818		0	-4.00814	2.17682	1.7653	10.9725	12.3639
C1QL1	1		8.28615	8.50015	1.68999	1.9601	6.29605	3.08132		0	5.10053	1.41752	1.7513	4.65648	1.83802		1.07929	5.56166	1.2145	4.31719	10.1759	7.5758
C1QTNF1	0		0	-0.608592	1.88462	1.14192	3.4921	3.77318		0	-2.26796	2.41254	0.891368	2.52106	3.67754		0	1.38252	3.64067	1.02672	10.0342	9.6781
C1QTNF2	0		0	3.56467	3.59246	5.18996	6.08952	3.52355		0	2.91971	0.558405	0.549133	2.79027	1.96954		0	3.89915	0.749233	3.64745	8.7278	7.17745
C1QTNF3	0		0	-3.26618	2.45665	7.87457	7.3069	8.65544		0	-2.29824	1.15283	1.80657	2.55711	4.02565		0	-2.39031	2.64178	11.9605	8.0334	10.4462
C1QTNF4	0		0	-0.0674476	0.863687	0.888122	2.62052	2.632		0	0.82444	0.704333	0.115144	0.134759	0.293802		0	0.134608	3.76138	2.68805	2.0432	1.80355
C1QTNF6	0		0.712822	-4.63773	0.413651	2.53578	3.4903	4.16768		0	-3.16449	0.198546	0.967018	2.69623	3.71676		0	-3.71822	0.482901	2.27028	8.3873	9.19035
C1QTNF7	0		0	0.0983552	2.29466	3.15153	2.42838	2.42801		0	-1.48729	0.740344	0.884721	1.85559	2.04564		0	1.54332	4.97678	10.2673	7.2134	5.7887
C1QTNF9	0		0	-0.914752	0.000151809	0.000174857	2.37285	2.37622		0	-1.24841	0.031496	0.0963029	0.358636	0.40723		0	0.490605	2.33197	4.0965	2.0423	0.98445
C1R	0		0	1.24198	2.78366	2.8216	10.3643	9.93266		0	-0.154189	1.04353	0.693349	6.92612	6.87722		0	1.80918	1.73362	1.64782	13.6959	13.1023
C1RL	0		0	1.52601	2.63386	1.47766	7.53893	6.99909		0	1.65821	0.584039	0.172256	4.64914	4.26822		0	4.00049	1.21589	1.42634	10.4407	9.03715
C1S	0		0	-0.513794	2.25399	3.75473	11.4119	11.5851		0	-1.36384	1.11396	0.617467	6.68963	6.8759		0	2.09812	2.20807	2.08943	13.4801	12.6463
C2	0		0	-3.26989	4.64433	4.85611	6.17567	8.07919		0	-4.58331	1.21171	0.895684	3.60388	5.12194		0	-4.51661	1.95927	2.83598	8.789	11.122
C20orf141	0		0	0.657107	0.15473	0.0432344	2.81185	2.82535		0	-3.65945	0.0189912	0.214046	0	0.44532		0	-2.3793	0.8887	2.97684	0	1.09405
C20orf144	0		0	-1.13503	0.000128163	0.000139586	2.33265	2.33606		0	2.05791	0.294965	0.303968	1.75975	1.2264		0	2.1366	0.368073	0.232962	0.4846	0
C20orf173	0		0	-2.47738	0.000125298	6.48228e-05	2.25972	2.26566		0	-2.40828	0.00943512	0.11158	0.0755125	0.220465		0	-0.216098	0.0810637	0.0931564	0	0
C20orf194	0		0	-0.823597	0.334909	0.675007	7.82818	8.06836		0	1.11801	0.149879	0.115956	3.38487	3.22906		0	1.4061	0.393674	0.861325	9.3677	9.11905
C20orf196	0		0	-1.35644	0.050593	0.097864	3.0219	3.04234		0	-1.26852	0.128006	0.332766	1.93379	2.29363		0	-2.01324	0.215164	0.268101	5.4268	5.8111
C20orf197	0		0	2.49682	1.6638	0.000475921	2.47272	2.46568		0	2.0258	0.726158	0.0795261	0.68627	0.44406		0	2.18027	4.09606	2.19002	2.9271	2.06265
C20orf202	0		0	-0.994891	0.00843316	0.0172741	2.9224	2.94382		0	-1.41143	0.0201325	0.039889	0.217958	0.226268		0	0.0558109	0.623455	0.586924	2.4108	2.42455
C20orf203	0		0	-0.87237	0.0935777	0.138328	2.49978	2.51019		0	-0.302832	0.0766813	0.17531	0.880051	0.788772		0	3.9347	1.56426	0.76691	1.907	0.66525
C20orf24	0		0	-0.579376	0.218316	0.422226	11.1053	11.3636		0	-1.71644	0.177614	0.257275	5.47552	5.75972		0	-1.68868	0.197827	0.496197	10.0901	10.3753
C20orf27	0		0	-0.241846	1.13354	0.474157	5.41622	5.74683		0	0.577964	1.51805	0.417705	4.3581	4.40317		0	-0.81804	2.42848	0.468939	8.8362	9.6633
C20orf85	0		0	-0.608163	0.000122432	0.00015472	2.21038	2.21204		0	-1.23216	0.0148913	0.277894	0	0.0494543		0	-1.75371	0.0164115	0.184673	0	0
C20orf96	0		0	-1.11375	6.41739e-05	0.00377394	2.23005	2.23363		0	-0.0107987	0.141052	0.396524	1.6074	1.43252		0	2.78511	0.472678	0.577809	7.6416	7.1062
C21orf2	0		0	0.16257	0.231025	0.390888	6.48569	6.45705		0	0.708751	0.166683	0.342108	3.30935	3.08296		0	-0.0483267	0.378751	0.57384	9.2303	9.2035
C21orf33	0		0	-1.75504	0.314508	0.463727	9.10593	9.35551		0	-0.470731	0.119631	0.133837	4.93038	4.95878		0	-3.84311	0.197963	0.126115	10.7146	11.0437
C21orf58	0		0	1.38061	0.921905	0.61158	4.65246	4.15208		0	0.939494	0.513453	0.579559	3.21207	3.21146		0	3.20853	0.873472	0.833135	7.891	7.09725
C21orf59	0		0	-2.33107	0.241819	0.471303	7.54831	7.81124		0	-0.657674	0.0858509	0.352926	3.98215	4.06524		0	-2.11409	0.231773	0.221091	8.9796	9.07145
C21orf62	0		0	0.642495	0.0282809	0.0406005	2.19995	2.19976		0	0.626969	0.0860122	0.127805	2.25516	2.14364		0	1.8679	4.84974	1.63145	1.4966	0.8973
C21orf91	0		0	-0.846917	2.88961	1.07029	8.74791	8.83019		0	1.88111	0.30751	0.479625	3.29442	2.80876		0	-2.23846	1.70852	0.940333	8.6698	8.97105
C22orf15	0		0	-2.15323	0.000386432	0.00473498	2.35703	2.35879		0	0.756569	0.0931742	0.239976	0.401923	0.187452		0	1.2646	1.20509	1.2916	1.4525	1.07105
C22orf23	0		0	-1.6105	0.000143248	0.011833	2.25555	2.25713		0	4.95773	0.442167	0.248312	3.97075	3.22559		2.95418	7.12535	1.02259	0.3589	7.2193	5.77665
C22orf24	0		0	-2.42224	0.000102449	0.000211104	2.1547	2.16205		0	4.64864	0.107939	0.0473272	1.0036	0.509641		0	4.24895	0.910129	0.602558	2.0423	1.27455
C22orf29	0		0	-2.44915	0.564219	0.741922	3.82301	4.18878		0	-1.6748	0.12069	0.121993	2.7498	3.09385		0	-0.319128	0.238299	0.230061	8.8549	8.77945
C22orf31	0		0	-2.32749	7.25302e-05	0.000990449	2.2153	2.21769		0	-2.75131	0.0124451	0.0676571	0.0264616	0.260458		0	-1.20448	0.822539	0.68039	0.8248	1.2449
C22orf34	0		0	-0.596128	0.408565	0.64863	2.84873	2.88268		0	-4.75464	0.131199	0.267015	0.718702	1.69622		0	-4.54092	0.93738	0.725962	1.0616	2.2448
C22orf39	1		3.64207	6.24478	0.438142	0.402484	8.46423	7.52645		0.355118	5.57614	0.125436	0.282687	5.00423	4.14995		2.23067	6.51508	0.257427	0.430206	10.3291	9.18395
C22orf42	0		0	0.55256	0.000157464	0.000176606	2.31186	2.31247		0	-1.32873	0.0133276	0.0133063	0	0.0725452		0	1	0.00470631	0	0	0
C22orf46	0		0	2.68064	0.0558776	0.00519602	2.4329	2.4342		0	-0.219911	0.253848	0.151037	2.4885	2.43622		0.192281	4.82867	0.370616	0.59191	9.8085	8.9391
C2CD2	0		0	-3.6872	1.87787	2.46486	6.94159	8.04318		0	-4.43466	0.402776	0.276427	3.25436	3.98303		0	-0.111751	0.854109	0.323931	9.5051	9.47845
C2CD2L	0		0	-3.73536	0.256069	0.251351	3.227	3.54945		0	-4.36604	0.0431528	0.091505	2.06967	2.52355		0	-3.3998	0.208028	0.147652	8.2294	8.49915
C2CD3	0		0	2.51528	0.968525	0.560018	7.58035	6.96817		0	-0.401822	0.0816963	0.279041	3.07419	3.20321		0	2.68171	0.292884	0.468597	9.4516	9.17135
C2CD4A	0		0	0.525816	0.0237543	0.00352972	2.85539	2.86325		0	1.4507	0.514732	0.0274578	0.64034	0.673334		0	1.85607	2.12255	1.51277	1.828	1.1199
C2CD4B	0		0	0.153269	0.235061	0.202229	4.00149	4.03695		0	-1.83654	0.576004	0.28541	0.382469	1.02454		0	-0.492824	2.01323	2.0089	3.5749	3.8882
C2CD4C	0		0	-1.1101	0.0935096	0.396017	2.99551	3.01849		0	-0.526818	0.266997	1.4233	0.290808	0.231399		0	-0.212859	1.45827	5.56802	4.2843	3.96755
C2orf15	0		0	-0.264126	0.347369	0.321214	8.4066	8.27522		0.968649	6.25821	0.397996	0.0867827	1.89352	1.08082		3.50196	7.59624	1.04099	0.820876	3.8466	2.07035
C2orf16	0		0	-1.38002	0.0081371	0.0829307	2.06868	2.07129		0	1.85418	0.168864	0.0412951	0.793557	0.729009		0	0.649466	1.11074	1.05115	4.8554	4.33785
C2orf27A	0		0.559015	-4.48613	0.176188	0.411279	4.63488	4.95566		0	-4.24049	0.377015	0.38532	1.43512	2.454		0	-0.644275	2.18831	2.39013	5.1037	5.47475
C2orf40	0		0.0237351	4.30764	11.5659	2.20968	3.41055	2.02729		0	4.78967	3.56847	0.615001	2.9491	0.354749		2.16165	6.45739	8.9193	4.58243	8.1555	2.5492
C2orf42	0		0	-2.72869	1.23816	0.896575	5.13648	5.71391		0	-1.44639	0.138816	0.0649613	2.74494	2.98706		0	-0.961608	0.221721	0.218606	7.6254	7.8059
C2orf49	0		0	0.117864	0.251703	0.454639	8.23697	8.28343		0	0.984685	0.0549547	0.117724	3.58964	3.48101		0	-1.74235	0.27424	0.337935	6.8189	6.8191
C2orf50	0		0	-1.24975	6.6686e-05	8.50197e-05	2.26797	2.271		0	-0.474267	0.0233293	0.0234739	0.0608687	0.07713		0	-1.81775	0.455444	1.37501	0.5172	0.99625
C2orf54	0		0	-1.35392	0.00317476	0.0169115	2.57178	2.57688		0	-1.45052	0.0104056	0.0227333	0.239385	0.253195		0	-1.61867	0.284718	0.624727	0	0
C2orf61	0		0	-2.85203	4.37011e-05	6.33995e-05	2.29281	2.29719		0	-0.533618	0.0798301	0.0617669	0.539533	0.575883		0	-1.45048	0.175958	0.760733	0.5202	0.6336
C2orf68	0		0	2.04399	0.687105	0.857288	7.72963	7.52407		0	0.948948	0.276538	0.151037	3.7035	3.60695		0	0.699681	0.306554	0.199213	9.6694	9.52065
C2orf69	0		0	0.862244	0.291956	0.231814	10.2885	10.1553		0	-0.951142	0.102148	0.178877	3.63487	3.81295		0	0.764141	0.175769	0.276881	8.6772	8.57655
C2orf70	0		0	-1.38867	0.000277996	0.000415219	2.6155	2.62073		0	1.26948	0.0309523	0.0217713	0.0883873	0		0	-0.311875	0.77592	1.39794	0.3956	0
C2orf71	0		0	0.182111	2.35565e-05	2.59515e-05	2.0337	2.03344		0	-0.981668	0.000728161	0.00142904	0.0082833	0.0129975		0	-1.30466	0.564728	6.60611	0	0
C2orf72	0		0	-1.70206	0.00208958	0.0271679	2.826	2.839		0	0.129916	0.475345	1.15005	0.278491	0.0748389		0	-0.418301	3.11779	6.04011	2.9834	3.06895
C2orf73	0		0	-1.23554	0.000470893	0.0299647	2.72704	2.73854		0	1.12286	0.0423538	0.00826032	0.134011	0.151698		0	0.147754	1.0155	0.493383	0.8631	1.26895
C2orf74	0		0	-0.591769	2.04745	1.58115	6.29085	6.34759		0	0.584772	0.626561	0.711972	3.10804	2.84051		0	-0.0240678	0.842368	0.429241	7.833	7.78115
C2orf76	0		0	1.93395	0.658363	0.574663	7.41656	6.81355		0	1.2492	0.0888332	0.0662366	2.77212	2.57706		0	0.560471	0.17178	0.274607	6.4742	6.34215
C2orf80	0		0	0.129279	2.76198e-05	4.35217e-05	2.13015	2.13035		0	-1.30131	0.000143666	0.000497442	0	0		0	-2.27108	0.00527908	0.111865	0	0
C2orf81	0		0	-2.11439	0.241333	0.701197	3.57729	3.69649		0	-0.837637	0.284193	0.343071	1.27538	1.39448		0	-2.30454	1.18028	0.679357	6.037	6.41875
C2orf82	0		0	-0.890123	0.0384869	0.523712	3.20151	3.23433		0	-1.28484	0.117285	0.469155	0.770861	0.986372		0	-1.22079	0.716328	4.41517	1.1257	0.9751
C2orf83	0		0	0.286001	0.0148756	0.00168669	2.73636	2.73957		0	-0.0521455	0.0278232	0.0323347	0.898805	0.902174		0	1	0.00562913	0	0	0
C2orf88	0		0.328155	-4.41266	0.328917	2.6664	2.98072	3.33246		0	-1.77004	0.288869	0.449831	2.50073	2.58431		0	-1.41621	1.22909	2.74839	4.924	5.73425
C3	0		0	-1.29959	6.97206	13.2501	7.86576	8.9108		0	-1.77183	2.96819	3.49133	2.62314	3.59904		0	-1.98529	4.46798	10.1369	8.8341	10.3453
C3AR1	0		0	-2.55556	1.91779	2.58995	8.1047	9.0638		0	-3.89969	0.365577	0.397166	2.838	3.90939		0	-3.58283	1.49612	1.33993	7.8489	9.24815
C3orf14	0		0	4.13482	1.27045	3.74981	9.48571	8.41659		0	0.328443	0.506409	0.483933	2.94225	2.62006		0	2.90983	0.811402	2.41079	8.2319	7.1664
C3orf18	0		0	2.42432	0.518771	1.1515	6.31698	5.87289		0	2.90468	0.23478	0.314232	3.09805	2.34252		0	4.20594	0.441649	0.71024	8.8328	8.03815
C3orf20	0		0	-1.67164	0.00192381	0.0485318	2.514	2.51982		0	-0.267314	0.04706	0.0989368	0.342871	0.253529		0	-0.771277	0.407815	1.03299	0	0.2416
C3orf22	0		0	-0.280995	8.41155e-05	9.30786e-05	2.15189	2.15238		0	-1.2074	0.0242331	0.1708	0	0.120187		0	0.725418	0.0212315	0.0122409	0	0
C3orf30	0		0	1.26052	0.000228956	0.000235946	2.37332	2.37364		0	-0.904455	0.121942	0.171358	0.22034	0.191037		0	-1.49319	0.0106044	0.728218	0	0
C3orf33	0		0	-1.44827	0.00106242	0.00745017	2.70664	2.71904		0	1.21941	0.145171	0.0940153	2.34391	2.13107		0	-0.0584264	0.641454	0.63714	6.1239	6.04295
C3orf35	0		0	-0.957992	0.000335251	0.000357122	2.37893	2.38411		0	-0.464187	0.265051	0.0660476	1.72406	1.73855		0	2.13936	0.738767	0.673532	3.2251	2.7794
C3orf36	0		0	0.54765	0.00107968	0.00121071	2.73581	2.7308		0	-2.08547	0.0269063	0.0670916	0.175143	0.34044		0	-0.350524	1.59997	3.84543	2.5181	2.2273
C3orf38	0		0	-2.7802	0.799627	0.509824	7.6095	7.88454		0	-2.31671	0.0689535	0.466686	3.96748	4.34885		0	-1.3366	0.180828	1.01413	8.4525	8.67685
C3orf52	0		0	0.035271	0.372644	0.780658	3.11837	3.1012		0	0.120896	0.557569	0.332635	2.35479	2.22271		0	0.563397	2.22282	3.67608	6.0732	6.16095
C3orf58	1		9.30962	8.92309	0.483524	0.76659	10.7778	9.41091		0.0611151	5.25682	0.363376	0.215402	5.47341	4.56316		0	3.16902	0.545514	1.13645	10.5338	9.78965
C3orf62	0		0	1.79741	0.234903	0.350037	7.61603	7.58115		0	-1.08794	0.239403	0.104437	2.19923	2.49846		0	3.63226	0.293726	0.506536	7.3018	6.9193
C3orf67	0		0	2.08217	0.587178	0.277282	3.49257	3.37799		0	1.03462	0.785533	0.547077	1.89141	1.37037		0	2.65356	3.86081	2.1059	6.6885	5.31425
C3orf70	1		16.8589	12.7279	3.76729	3.93328	10.424	4.92496		3.53886	9.49524	0.260281	0.962628	5.42771	2.53953		5.44145	9.34869	0.573148	3.2586	10.9363	6.8029
C3orf79	0		0	0.548823	0.000215842	0.000202902	2.4131	2.41602		0	-1.81662	0.00642572	0.0268475	0	0.113645		0	-1.10676	0.0207998	0.566345	0	0
C4BPA	0		0	-1.1643	0.00131024	0.555895	2.27055	2.27846		0	0.516875	0.0237967	0.0138672	0.176963	0.123562		0	-0.598614	1.18341	0.687345	0	0.25605
C4BPB	0		0	-2.42984	0.0033602	0.420699	2.60059	2.6183		0	-0.794633	0.0628794	0.889861	0.105534	0.142765		0	-3.44814	1.02401	1.64925	0.4801	1.4421
C4orf17	0		0	1.44627	0.24797	0.0455564	2.66005	2.67299		0	3.8436	0.0378994	0.000681463	0.0757415	0		0.713916	5.2604	0.772174	0.0640209	0.8084	0
C4orf19	0		0	0.250487	0.57178	0.348791	2.38416	2.38716		0	-1.91777	0.0289271	0.341997	1.18964	1.40181		0	-2.24025	0.799035	0.904059	1.1798	1.80905
C4orf22	0		0	-1.19501	0.000283509	0.0043226	2.40901	2.41602		0	-2.7398	0.0194207	0.435548	0	0.253217		0	-3.23683	0.0305971	0.341343	0	0.2103
C4orf26	0		0	-0.988106	2.88719e-05	0.564521	2.03281	2.03244		0	-0.910685	0.0493013	0.157462	1.71107	1.74949		0	-0.9465	0.62992	5.02837	0.9527	0.7469
C4orf3	0		0	3.18766	0.448737	0.448277	11.8204	11.3933		0	3.07603	0.122644	0.279379	6.1899	5.53516		0	1.7138	0.339205	0.241485	12.1782	11.7185
C4orf32	0		0	2.21086	1.95278	3.49939	6.95552	6.23826		0	0.208191	0.459699	0.590795	2.73844	2.60764		0	-0.0831106	1.06355	1.71407	7.8529	7.89945
C4orf33	0		0	-0.390251	0.845285	1.15988	4.40356	4.46348		0	0.546914	0.152661	0.191443	2.86381	2.7613		0	0.467066	0.393992	0.469473	7.0399	7.1662
C4orf36	0		0	-0.645608	0.000761124	0.00116242	2.62409	2.63312		0	-0.0959762	0.212273	0.45321	1.32662	1.17796		0.21387	4.84653	0.69485	1.21949	3.0246	1.2937
C4orf45	0		0	0.0686203	7.16172e-05	7.69806e-05	2.24152	2.24264		0	-1.58055	0.0695892	0.162879	0.507334	0.723964		0	-0.324507	0.0670741	0.116034	0	0
C4orf46	0		0	-0.776248	0.393787	0.396927	12.4128	12.3804		0	-1.19046	0.27436	0.200149	3.78133	3.68653		0	-0.239223	0.350082	0.44046	8.8038	9.02365
C4orf47	0		0	-0.7954	0.646806	0.668972	3.2119	3.22028		0	-0.532863	0.261841	0.761642	0.967055	0.974192		0	-1.5919	1.00877	1.27485	2.8639	3.62355
C4orf48	0		0	-3.90889	1.61083	2.43179	5.65295	6.87089		0	-3.78559	0.981548	0.681751	1.95566	3.09018		1.24359	-5.69717	1.93897	1.90235	3.9832	5.77465
C5	0		0	3.98695	2.1723	2.09682	5.49305	4.21089		0	2.55119	0.368034	0.255051	3.06045	2.55473		0	4.34786	0.48071	0.97224	7.7853	6.5059
C5AR1	0		0	-0.440629	1.45456	2.97234	6.49701	6.74008		0	-3.62708	0.57682	0.355182	2.75267	3.42337		0	-2.64206	1.52347	1.49094	7.747	9.03435
C5orf15	1		6.44348	-7.57157	0.207188	0.310836	9.59915	10.4455		1.16448	-6.4819	0.102632	0.161082	4.52315	5.37802		2.3831	-6.64256	0.147257	0.514562	9.7912	10.956
C5orf22	0		0	3.67302	0.665281	0.54967	9.12285	8.49396		0	0.00237079	0.108822	0.186394	3.83749	3.82362		0	1.67059	0.300936	0.427926	9.2169	8.9927
C5orf24	1		12.9387	11.9283	0.304876	0.113983	11.9091	10.6509		0	4.62248	0.348547	0.139826	5.61675	4.84897		1.50593	5.91331	0.401984	0.648821	11.5013	10.1179
C5orf30	0		0	-0.121626	1.26003	0.599506	6.41806	6.54654		0	-2.64069	0.549207	0.234133	2.23467	3.0879		0	-2.49275	0.76445	0.546285	7.1692	7.84305
C5orf34	0		0	3.13004	1.09017	0.821839	5.03954	4.46483		0	-0.2034	0.436513	0.234382	2.9219	2.97553		0	1.87692	0.481178	0.696676	7.1607	6.88225
C5orf42	0		0	2.02909	0.552168	0.196748	3.09566	3.02454		0	-0.709699	0.125343	0.164069	4.23466	4.36182		0	2.41652	0.272953	0.848822	9.1134	8.5618
C5orf46	0		0	3.32667	11.7507	6.1036	5.84315	2.41587		0	-0.213343	4.61634	4.77384	2.11956	3.20687		0	-0.43317	9.29878	17.3877	4.2904	3.265
C5orf47	0		0	-1.34802	0.00289608	0.006117	2.7738	2.78623		0	0.885616	0.0216256	0.0110402	0.104313	0.0573679		0	1.36461	0.35061	0.293501	0.6324	0.4519
C5orf49	0		0	-1.94009	0.000543376	0.000588495	2.67969	2.68564		0	0.965192	0.320297	0.293077	0.267621	0.108421		0	2.61265	2.60958	3.31779	2.9151	1.20005
C5orf51	1		2.7165	5.7028	0.346849	0.515698	9.46574	8.69348		0	-0.201106	0.193917	0.198492	4.41465	4.23759		0	3.08175	0.279293	0.500379	10.3503	9.9129
C5orf58	0		0	-2.0233	0.000348929	0.437656	2.45197	2.45931		0	-2.28892	0.0544914	0.879297	0.204226	0.653115		0	-3.11841	0.776274	3.97412	1.469	2.8254
C6	0		0	0.617756	0.351428	0.0481359	1.93575	1.93441		0	-1.398	0.147582	2.70521	0.269877	0.150012		0	2.13145	2.56027	4.76382	2.7066	0.66525
C6orf1	0		0	-2.94231	0.384506	0.752416	5.7295	6.1711		0	-2.63954	0.278716	0.325416	3.68788	4.32603		0	-3.62855	0.420478	0.852299	8.4423	9.04215
C6orf10	0		0	-0.274787	4.62467e-05	7.87434e-05	2.3368	2.33713		0	3.35609	0.162036	0.0136703	0.327382	0.0753427		0	2.65164	0.0524026	0	0	0
C6orf106	1		4.90479	6.8163	0.258581	0.486304	8.07878	7.26814		0	5.15194	0.15671	0.152969	5.41028	4.68478		0.526534	5.10567	0.261728	0.263745	12.2877	11.4353
C6orf118	0		0	-0.910962	0.000301235	0.000390628	2.41148	2.4158		0	-0.425965	0.00769292	0.0186524	0.0579407	0.0420173		0	-1.06899	0.603156	1.14324	0.3939	0.77575
C6orf120	0		0	-2.63448	0.367985	0.549904	8.67647	8.94353		0	-1.89463	0.184003	0.197448	3.76653	4.05852		0	-1.66014	0.190541	0.483179	9.4074	9.63095
C6orf132	0		0.335432	-4.50786	0.00220391	1.7257	2.45254	2.5024		0	-2.98884	0.0124303	0.669119	0.326107	0.688716		0	-3.88954	2.55433	5.4135	1.5835	3.9256
C6orf136	0		0	-2.57056	1.54455	1.07847	5.54504	6.36639		0	0.648918	0.154462	0.134698	2.58629	2.32614		0	-2.08192	0.275098	0.366401	7.4875	7.7022
C6orf141	0		0	-1.16418	0.0131238	0.993857	2.69082	2.70494		0	-2.4409	0.0401324	1.28989	0.198248	0.396892		0	0.947602	2.31654	1.83369	1.6768	0.94325
C6orf15	0		0	-0.121534	0.00838516	0.0180261	2.14322	2.14941		0	-0.162405	0.000795713	0.000520196	0	0		0	-3.38323	0.0416167	0.29447	0	0.5284
C6orf163	0		0	-2.0145	0.0378715	0.204014	3.08576	3.12263		0	1.92133	0.240375	0.112867	1.90774	1.66765		0	-0.140099	0.619634	0.62853	2.1606	2.16635
C6orf201	0		0	-0.692309	0.000672182	0.000780093	2.55051	2.5565		0	-0.787918	0.022176	0.0365928	0.295691	0.327055		0	0.908537	0.550892	0.850574	2.9008	2.75265
C6orf203	0		0	2.91146	0.202711	0.494972	8.00648	7.80837		0	3.6724	0.116765	0.150576	3.45196	2.87248		0	0.203519	0.240883	0.318223	7.8625	7.953
C6orf223	0		0	-0.901848	0.200341	0.154951	3.67179	3.79073		0	3.33875	0.568163	0.0384615	0.428932	0.173693		0	3.13862	4.20008	2.44741	2.6883	1.3467
C6orf226	0		0	2.70129	0.552624	0.751991	6.11996	5.58695		0	2.18675	0.167343	0.282558	3.65174	3.15548		0	1.90481	0.328209	1.06866	7.1806	6.68625
C6orf47	0		0	-0.694804	0.217964	0.305244	6.63936	6.47837		0	0.910362	0.134769	0.114288	3.85591	3.65959		0	1.49782	0.160909	0.079875	9.9506	9.7016
C6orf48	0		0	-4.04959	0.600238	0.559978	10.4194	10.9457		0	-1.13446	0.277225	0.3041	6.58493	7.19193		0	-0.549811	0.578811	0.427199	10.732	10.9627
C6orf52	0		0	0.953979	0.393015	0.0335618	2.6936	2.6939		0	-0.88072	0.260449	0.313099	0.544776	0.640284		0	-0.197724	1.37851	1.6229	2.5139	2.4028
C6orf58	0		0	-1.11192	0.000208178	0.000194253	2.32443	2.32708		0	-1.68614	0.00830702	0.0279932	0	0.0642938		0	-3.00393	0.179772	0.637694	0	0.9574
C6orf62	1		2.31214	-5.48513	0.461813	0.698479	9.45307	10.536		0.603187	-5.84913	0.171741	0.15037	5.56208	6.2565		3.7553	-7.81707	0.304492	0.134093	10.9261	11.8085
C6orf89	0		0	-0.505991	0.649994	0.505014	8.96536	9.08602		0	0.29992	0.206605	0.127826	4.70131	4.6373		0	3.4921	0.169439	0.113542	11.6823	11.3107
C7	0		0	3.65543	8.11039	3.19816	5.36969	3.23701		0	0.48315	3.48665	6.00336	2.37556	0.696538		0	3.27764	8.8689	22.7737	9.2399	2.95575
C7orf25	0		0	-0.131959	0.579773	0.634759	5.39004	5.38871		0	-0.629601	0.13627	0.318406	3.46587	3.47549		0	0.866774	0.189777	0.267892	8.3549	8.2222
C7orf26	0		1.08717	-4.82881	0.332438	0.302212	6.81717	7.26274		0	-3.73147	0.128418	0.142741	3.5753	4.03122		0	-1.53501	0.189303	0.367485	9.2027	9.3967
C7orf31	0		0	0.21156	0.834762	1.04503	3.04136	2.99943		0	-0.92087	0.126617	0.165876	1.11554	1.33361		0	0.382266	1.68259	1.54517	6.6983	6.38745
C7orf33	0		0	-0.72942	0.000392173	0.000438576	2.44296	2.44901		0	-0.849407	0.014124	0.0107965	0	0.0577769		0	-1.39129	0	1.05616	0	0
C7orf34	0		0	-2.32725	0.0117544	0.0294999	3.09697	3.11638		0	-1.12779	0.0412394	0.28608	0.110268	0.0983642		0	-0.282174	0.165959	0.458243	0	0
C7orf43	0		0	-2.54094	0.174036	0.136218	5.46173	5.57549		0	-5.01223	0.0641705	0.0642382	2.66077	3.09489		1.94164	-6.27426	0.214312	0.190019	7.6997	8.37395
C7orf49	0		0	-4.06852	0.811296	0.812762	6.67208	7.31654		0	-4.19075	0.0741236	0.0934534	4.46319	4.85665		0	-3.44488	0.163925	0.190304	8.9876	9.28305
C7orf50	0		0	0.558504	0.979862	0.806515	6.8888	6.54259		0	-0.250394	0.261316	0.516141	5.03746	5.22229		0	-0.45927	0.466529	0.742711	10.3611	10.4401
C7orf57	0		0	0.812862	0.300962	0.356425	2.95294	2.94862		0	-0.307053	0.603383	0.567992	0.563963	0.748895		0	2.30589	2.9704	2.22044	3.6741	2.87075
C7orf61	0		0	-2.42981	0.000417744	0.281612	2.22884	2.24186		0	-2.12962	0.0373382	0.351585	0.415737	0.761747		0	-3.89752	0.812232	1.30695	2.8468	3.9912
C7orf69	0		0	-0.895223	0.00247033	0.0425729	2.45623	2.46039		0	-1.75918	0.0659919	0.12226	0.238324	0.482436		0	-3.39096	0.238179	1.90516	0	1.09975
C7orf71	0		0	-0.687807	0.000160826	0.000345226	2.44945	2.4553		0	-3.42498	0.0525009	0.314835	0.323919	0.85208		0	-2.32263	0.0972531	3.52451	0	0.2347
C8A	0		0	-2.57932	0.00262923	0.00316063	2.80756	2.83095		0	-1.16689	0.000116527	0.0269168	0	0		0	-0.527824	0.370775	0.815016	0	0
C8B	0		0	-1.30697	0.000830102	0.028977	2.52071	2.52294		0	0.971158	0.033909	0.000217673	0	0		0	0.371152	0.491953	0.381837	0	0
C8G	0		0	-0.780225	8.65444e-05	0.000170654	2.21737	2.21781		0	0.117205	0.26819	0.159331	0.837902	0.932924		0	0.387002	0.874313	1.96834	2.0492	1.88125
C8orf22	1		5.32387	7.71093	16.5114	3.29925	8.48544	2.26668		1.48729	6.85678	5.20647	0.670538	3.62924	0		3.34981	7.46463	8.83357	6.98659	7.2507	0.26075
C8orf31	0		0	-2.27813	0.000501043	0.11947	2.28501	2.29409		0	-0.764377	0.248465	0.334027	1.32368	1.37645		0	0.180915	1.03578	3.52623	4.2404	4.2214
C8orf33	0		0	-1.38494	0.603384	0.767029	8.04218	8.18005		0	-1.4367	0.266983	0.19779	4.04168	4.20145		0	-0.452843	0.27897	0.832675	10.0412	10.1127
C8orf34	0		0	-1.80902	0.0295482	0.432045	3.0849	3.07044		0	0.794125	0.992449	0.886101	0.435106	0.1037		0	0.339961	4.54937	2.4013	1.7704	2.20385
C8orf37	0		0	0.539011	0.217127	0.244618	3.05337	3.04454		0	0.300962	0.129151	0.115439	2.10993	2.04005		0	2.74989	0.513055	0.817611	6.0894	5.39905
C8orf4	0		0.356015	4.38257	3.78813	3.45283	7.98686	6.20211		0	3.02784	1.57927	1.03765	4.32119	2.92497		0	3.88499	2.00565	2.90268	9.6202	7.5752
C8orf44	0		0	2.38945	0.577979	0.362548	5.17753	4.85572		0	0.296109	0.0884852	0.124524	2.66974	2.55615		0	2.43163	0.218804	0.388129	5.4841	4.8813
C8orf46	1		3.63108	6.89688	4.31101	0.225239	5.13654	2.75293		0.364834	5.58676	0.586614	1.0672	3.23486	1.10908		1.40345	5.8287	1.94073	3.76524	8.1778	4.5797
C8orf48	0		0	1.03047	0.884073	0.89986	2.85856	2.81394		0	-1.64003	0.8612	0.711092	1.37388	1.76686		0	0.535607	3.34432	1.40537	5.5053	5.2363
C8orf58	1		3.58849	-6.24592	0.749802	0.595701	4.96199	5.91117		0	-5.05404	0.138497	0.0790052	2.73903	3.22246		0	-3.1346	0.15885	1.19007	7.7371	8.5066
C8orf59	0		0	3.0662	0.228079	0.435774	11.2231	10.8707		0	1.93152	0.0734463	0.129609	4.88792	4.6864		0	-1.05414	0.206139	1.03227	9.0331	9.2196
C8orf74	0		0	-0.876128	0.000651819	0.00113577	2.56238	2.57197		0	-1.87371	0.000632014	0.00183337	0	0		0	1	0.00393869	0	0	0
C8orf76	0		0	-2.96379	0.785382	0.552762	6.34517	6.69305		0	-4.96625	0.174648	0.0706585	3.1157	3.62138		1.21553	-5.67399	0.112568	0.311666	7.828	8.4087
C9	0		0	-0.438206	0.000280847	0.000331227	2.44189	2.44877		0	-2.22405	0.00754607	0.0577881	0.0500727	0.126588		0	-1.36271	0.835028	3.29419	0	0.93185
C9orf116	0		0	-0.948098	0.0251149	0.0750211	2.43477	2.44493		0	-0.933482	0.310837	0.637873	1.24296	1.37768		0	0.580449	0.487206	0.959386	4.7968	4.67
C9orf131	0		0	0.628528	0.158517	0.0948281	2.76821	2.78201		0	0.432461	0.377239	0.588557	1.94451	1.80344		0	1.85593	0.848721	0.521833	1.3994	0.99625
C9orf135	0		0	2.91733	3.80151	0.302823	2.4156	2.40964		0	2.26586	0.519292	0.163654	0.392563	0		0.336694	4.94816	1.82338	1.02173	2.0275	0
C9orf142	0		0	2.5583	0.763364	0.572518	6.47259	5.76378		0	-0.342308	0.303884	0.216996	4.65841	4.65178		0	-2.10769	0.517583	0.690784	8.6529	8.97025
C9orf152	0		0	-0.884103	0.000562406	0.00056825	2.54141	2.54666		0	-3.08114	0.0172857	0.127024	0.199353	0.547023		0	-2.11554	0.475872	0.523375	0.9018	1.47285
C9orf16	0		0	-1.36595	0.603948	0.742307	7.62952	7.68876		0	-0.842828	0.142945	0.180627	5.06776	5.11502		0	-2.31151	0.332198	0.847731	9.3643	9.76805
C9orf163	0		0	-1.08388	0.00012093	0.00599059	1.71387	1.71312		0	-1.15082	0.0416871	0.081342	0.35175	0.428064		0.353325	4.962	0.761704	0.319649	2.7752	1.9735
C9orf24	0		0	-0.428334	0.0227704	0.111554	2.08889	2.09166		0	0.204235	0.295987	0.442383	1.17047	0.933919		0	4.28993	1.74898	1.02247	3.2456	1.97075
C9orf3	1		11.936	10.4922	0.602879	2.72512	11.5516	8.7435		0	4.81631	0.131556	0.473863	5.59784	4.56997		1.87433	6.21834	0.506717	1.46048	11.41	9.9024
C9orf40	0		0	3.90999	0.818281	1.45478	8.25924	7.20879		0	0.369389	0.253796	0.325933	3.14299	3.01108		0	0.866149	0.437048	1.24926	8.0144	7.94125
C9orf43	0		0	0.884981	0.00190014	6.82457e-05	2.23207	2.23515		0	1.38485	0.263369	0.125805	1.00166	0.808251		0	2.89977	0.782572	0.444894	3.6527	3.1969
C9orf47	0		0	4.00124	2.22893	0.125299	3.2917	2.95695		0	2.95137	0.502948	0.820215	2.11169	1.05293		3.14903	7.29182	1.33212	2.39638	5.5811	2.1946
C9orf50	0		0	-2.45577	0.000176543	0.00721716	2.35934	2.36954		0	-1.75467	0.0479285	0.115172	0.196631	0.370187		0	-1.48082	0.930564	2.12946	0.9608	1.5063
C9orf57	0		0	-0.417443	0.000100366	8.45368e-05	2.22692	2.22743		0	-1.4896	0.0136241	0.0989299	0.113007	0.167056		0	-0.586679	0.0609358	0.121684	0	0
C9orf64	0		0	0.557611	0.256071	0.327987	10.7876	10.897		0	-0.470162	0.14834	0.28416	3.88915	4.05729		0	2.42981	0.1823	0.756801	9.2056	9.02265
C9orf66	0		0	-1.58616	0.000143045	0.000167951	2.34287	2.34719		0	-2.94109	0.0794233	0.0923124	1.12427	1.41492		0	-2.64382	0.985538	1.11061	1.7895	2.7738
C9orf69	0		1.73143	-5.20178	0.475711	0.436467	6.05902	6.90824		0	-3.60343	0.126054	0.12692	3.82638	4.14887		0	-3.55543	0.329171	0.708561	9.6412	10.4578
C9orf72	0		0	4.0121	0.974662	1.72729	6.88061	5.93057		0	3.51872	0.28938	0.552654	4.2986	3.4745		0	3.7263	0.217917	1.00211	8.1686	7.3905
C9orf78	0		0	3.51145	0.329962	0.146953	7.86963	7.53706		0	3.10823	0.0929022	0.0890542	4.98747	4.71938		0	3.36218	0.231819	0.203208	10.9121	10.4944
C9orf84	0		0	-1.7577	0.000164928	0.00108721	2.33771	2.34246		0	-1.40729	0.132039	0.343715	1.80777	1.90733		0	-2.05368	0.29121	1.87868	0.4483	0.9697
C9orf85	0		0	-2.53626	0.276781	0.386607	7.94893	8.28607		0	-2.64216	0.0677153	0.39311	2.99171	3.53874		0	-2.42642	0.25029	0.363976	7.3123	7.6846
CA1	0		0	0.193236	0.0460205	0.0272086	2.82621	2.8392		0	1.05062	0.175658	0.119664	0.573931	0.404746		0	-0.546163	0.420742	1.69253	0	0
CA10	0		0	-1.0078	0.117449	0.800812	2.51429	2.52662		0	0.378941	0.868485	0.375974	0.0281154	0		0	0.133784	1.22959	1.79117	0.4602	0
CA11	0		0	0.0816964	1.1577	3.24639	2.91211	2.59781		0.671607	5.92507	0.661807	0.180508	2.71389	1.30557		0	4.1965	0.784758	2.90232	8.3312	6.3683
CA12	0		0	1.16169	7.92562	8.46983	9.37285	8.63002		0	-0.287008	3.64556	2.43578	4.46199	4.72775		0	2.76495	5.05366	13.8973	11.0292	8.7529
CA13	0		0	0.606526	0.81023	0.937303	3.08976	2.93796		0	1.20746	0.296654	0.387027	1.85769	1.21126		0	1.9982	1.66226	2.1509	5.4075	4.32075
CA14	0		0	1.00298	0.808961	0.259427	2.25096	2.25926		0	3.12102	1.12117	0.0759855	1.05639	0.812308		0	3.4384	7.75695	1.27644	2.5538	1.99985
CA2	0		0	-2.48312	3.64476	8.41707	3.95605	4.72507		0	-2.82048	1.08726	0.840002	1.97526	2.65821		0	-2.22081	2.36784	2.35867	6.4896	7.0426
CA3	1		2.04811	5.40671	5.85818	4.46105	6.26445	2.89823		0	3.96459	2.4344	1.86576	3.07839	0.413899		0	3.55133	6.05942	19.8906	8.1758	2.4194
CA4	0		0	0.582629	0.960956	0.470146	3.12912	3.14154		0	1.27983	0.362856	0.304499	0.619998	0.427719		0.423946	5.02051	5.14524	3.19266	4.5252	1.4687
CA5A	0		0	-1.08617	5.1112e-05	0.00155452	2.10163	2.10235		0	-0.742527	0.0435186	0.0357092	0.165692	0.230712		0	-1.97243	0.0512712	0.909729	0	0
CA5B	0		0	0.794505	0.748934	1.04587	2.71487	2.69981		0	-0.13947	0.230911	0.412791	3.05694	3.25287		0	1.30185	0.71458	1.07164	8.7377	8.22545
CA6	0		0	-2.13011	0.000120544	0.00255467	2.4653	2.4687		0	0.446654	0.0042699	0.00184805	0	0		0	-0.184125	0.510441	0.124189	0	0
CA7	0		0	-0.842719	0.00249929	0.0224657	2.50456	2.50481		0	0.0565489	0.00640132	0.0033135	0	0.0383664		0	-1.46623	0.224538	1.06607	0	0.445
CA8	0		0	-1.39423	0.00699061	0.0100782	2.88098	2.89012		0	-1.2025	0.0460742	0.0586116	0.340552	0.397574		0	-1.18081	1.3731	4.53257	3.6757	3.79715
CA9	0		0	0.611535	4.74038	3.7948	2.14778	2.14504		0	2.26639	3.7629	1.83083	1.97776	1.53403		0	0.253357	9.08344	21.9147	6.5285	5.28025
CAB39	0		0	0.666675	0.18262	0.524725	10.196	10.1306		0	1.10721	0.12684	0.249447	5.12277	5.04394		0	0.957494	0.21519	0.227582	10.9252	10.7178
CAB39L	0		0	3.57093	4.0564	2.69501	4.26521	2.50947		0.447282	5.67722	0.968247	0.358091	3.38901	1.68203		0.179776	4.81827	2.5241	0.558602	8.7015	6.9026
CABIN1	0		0	1.99872	0.546952	0.407656	7.81132	7.69557		0	-4.05646	0.115304	0.0246641	3.8319	4.11		0	2.63298	0.391716	0.252007	11.1595	10.8903
CABLES1	0		0	-3.31807	0.853228	1.26896	4.43004	5.23105		0	-1.32034	0.398816	0.671812	2.01371	2.1232		0	-0.642578	0.795269	1.361	8.1933	8.2144
CABLES2	0		0	3.04042	0.785217	1.06473	6.7979	6.28164		0	0.531277	0.138924	0.0578563	2.48602	2.43938		0	3.84612	0.282808	0.444059	8.6149	7.79945
CABP1	0		0	1.6409	1.18011	0.251947	2.46427	2.46942		0	2.81995	1.12711	0.232447	0.819408	0.288093		0	2.5379	4.76636	3.1309	4.7937	2.8723
CABP2	0		0	-1.35592	0.00285508	0.0407393	2.52652	2.5309		0	-1	0	0.00100681	0	0		0	-0.919693	0.00932832	0.620498	0	0
CABP4	0		0	-0.43902	0.378279	0.617918	6.03262	6.1312		0	-2.2256	0.0235714	0.0610612	1.32927	1.50862		0	-4.15771	1.09336	2.72759	2.1292	3.8215
CABP5	0		0	0.548695	3.24306e-05	4.03112e-05	2.0988	2.09954		0	0.771276	0.00713889	0.00677586	0.126469	0.10597		0	1.66897	0.162423	0.0624716	0	0
CABP7	0		0	-2.01716	0.0074482	0.250831	3.06856	3.11829		0	-1.1914	0.082726	0.0519677	1.37374	1.50893		0	-3.20596	0.443539	1.0623	2.9033	3.41255
CABYR	0		0.574691	4.57659	1.20503	0.616133	4.09114	3.30667		0	2.40928	0.316798	0.402577	2.43741	1.77145		0	3.86317	0.8326	1.57057	7.1626	6.1641
CACHD1	0		0.219982	-4.29455	3.28647	3.0902	4.2054	6.56316		0	-2.24205	0.999962	0.748454	1.43026	2.51589		0	-0.601309	1.47042	2.2562	7.441	7.4073
CACNA1A	0		0	0.33149	2.76515	1.84461	5.95781	5.41517		0	2.68682	2.54418	0.764353	2.26761	0.446016		0	1.90391	7.90415	1.12382	6.217	5.91885
CACNA1B	0		0	-0.0187876	0.495011	0.956873	2.12308	2.12152		0	2.38269	0.241718	0.0454278	0.28248	0.101495		0	2.81941	8.35064	5.16586	3.5758	0.65355
CACNA1C	1		3.37029	6.05585	1.4641	1.89299	6.61652	4.49209		0	3.9049	0.34614	1.0089	3.8972	2.55475		3.53955	7.62894	0.63755	2.662	11.7179	8.3403
CACNA1D	0		0	1.20481	1.15359	0.325309	2.51664	2.52195		0	2.26665	0.768265	0.255722	0.736054	0.230454		0	0.129319	4.9357	8.38656	3.2301	2.1806
CACNA1E	0		0	-2.21128	0.273283	2.70492	2.93931	2.97711		0	-1.08482	0.431131	0.492702	0.121151	0.392815		0	0.24651	6.96419	4.28327	1.9384	2.1061
CACNA1F	0		0	0.572739	2.02762e-05	1.73429e-05	1.95497	1.95291		0	0.0932902	0.00956456	0.00247927	0.0778464	0.0733958		0	-0.2978	1.65708	1.23324	1.8119	2.1489
CACNA1G	0		0	-2.30363	1.02455	2.30816	3.48075	3.645		0	-1.61303	0.629108	1.73502	0.523254	0.980422		0	1.66587	6.29114	7.61615	7.0968	4.5281
CACNA1H	0		0	1.28081	0.884629	0.34437	3.00402	2.92158		0	4.28282	3.15473	0.334842	2.98822	0.964356		0	3.15393	6.98948	3.39841	9.6306	7.17165
CACNA1I	0		0	-0.401921	0.628298	0.956848	3.90292	3.96166		0	-1.96498	0.0018035	0.142938	0.0307495	0.0698739		0	-1.0246	1.21346	5.31889	1.3614	1.1748
CACNA1S	0		0	-0.787342	0.765483	1.88946	2.64999	2.65419		0	-1.13377	0.000191516	0.0126972	0.0115105	0.0105005		0	-2.80368	0.598496	14.415	0.4602	1.2744
CACNA2D1	0		0	-0.382282	2.54419	3.77418	8.23323	8.20094		0	-3.25479	0.612083	0.305981	3.48715	4.31438		0	1.0262	2.65134	5.31218	6.3728	5.3622
CACNA2D2	0		0	-2.11525	0.174429	3.48806	3.05264	3.07794		0	2.78082	0.15021	0.105805	0.886579	0.476956		0	0.673972	1.41317	7.24702	5.4563	4.0652
CACNA2D3	0		0	1.48179	2.57075	2.87352	3.398	2.65129		0	5.13415	1.63397	0.37292	2.3734	0.924234		0	2.99294	2.57164	4.57347	6.9696	4.54495
CACNA2D4	0		1.27646	-5.08882	0.0202433	0.563304	2.54374	2.59346		0	-3.35689	0.0472279	0.113267	0.488477	0.866523		0	-3.91816	0.996832	2.84551	5.0432	6.74455
CACNB1	0		0	-0.720832	0.582796	1.12887	4.59254	4.63596		0	4.80314	0.254524	0.0413877	2.60668	2.04857		0	0.875029	0.331231	2.15262	8.235	7.55735
CACNB2	1		5.10421	7.36725	2.98435	1.00791	5.23328	2.87174		2.1472	7.65362	0.25419	0.201376	3.14941	1.75276		4.20158	8.21145	1.16006	3.24532	7.8842	3.86545
CACNB3	0		0	-1.04461	0.864	0.73562	5.29612	5.38724		0	2.65475	0.259776	0.288529	2.87113	2.59115		0	3.0183	0.68798	0.879576	9.3753	8.6491
CACNB4	0		0	-0.162429	0.0535938	0.0766759	2.7917	2.80477		0	2.59205	0.916273	0.318243	1.23271	0.596935		0	4.66637	3.30068	2.77584	6.478	3.891
CACNG1	0		0	-1.15714	0.567832	1.23367	2.75188	2.77112		0	-0.658494	0.027901	0.0294552	0.173653	0.27828		0	-2.05727	1.07737	11.2898	0	0.9021
CACNG2	0		0	-1.54465	2.33147e-05	0.0173217	2.19934	2.20228		0	-0.36004	0.00068088	0.000510813	0.0244256	0.0188528		0	-0.835374	0.067542	0.081864	0	0
CACNG3	0		0	-1.3939	0.00015793	0.000743325	2.27526	2.27654		0	0.230095	0.000383854	0.000275428	0	0		0	-0.579279	0.0949449	0.212317	0	0
CACNG4	0		0	1.09702	0.18357	0.112304	6.92893	6.86052		0	4.68518	2.06441	0.313587	1.72499	0.168054		0.334697	4.94645	4.34414	8.30591	7.9876	3.4945
CACNG5	0		0	0.914093	0.0348895	0.000732281	2.76887	2.77203		0	1.83073	0.947712	0.0121145	0	0		0	3.41901	5.8846	0.18483	0	0
CACNG6	0		0	-1.52319	0.0648472	0.338619	2.38341	2.3894		0	-0.527904	0.00960798	0.00975776	0	0.0336275		0	-2.08131	0.536649	8.37659	0	0.28215
CACNG7	0		0	0.466879	0.00011235	0.000126267	2.22855	2.22729		0	-1.27067	0.0683745	0.931196	0.0306323	0		0	1.48519	5.94402	4.14144	0.9449	0
CACNG8	0		0	-3.73071	0.0751607	0.341847	4.24564	4.40945		0	-1.13589	0.0155964	0.0421975	0.913322	0.912241		0	-0.910858	0.551289	0.776855	0	0.58905
CACYBP	0		0	-0.602608	0.431782	0.453135	10.6274	10.6807		0	-0.00334063	0.105015	0.1526	4.59656	4.57989		0	-1.35477	0.243527	0.362551	10.2639	10.4154
CAD	0		0	-2.40504	1.13681	1.29149	7.03294	7.90521		0	-3.30537	0.2031	0.273854	3.56898	4.10933		0	-1.51068	0.182552	0.461807	10.2783	10.6078
CADM1	0		0	-2.7657	5.03726	7.36783	8.19866	9.96029		0	-1.87291	2.35336	3.0909	2.9251	2.9938		0	-1.75779	2.30413	8.54048	8.3493	10.2104
CADM2	0		0	-0.805665	1.01597	2.38922	2.69599	2.70909		0	0.178556	0.166555	0.059923	0.108874	0.166818		0	-0.329233	4.65495	4.23163	0.8972	1.26355
CADM3	0		0	0.871188	1.87716	1.50983	2.53802	2.54138		0	-0.23581	3.20297	1.97432	0.767482	1.22473		0	0.251496	13.2731	11.8317	6.5634	5.29545
CADM4	0		0	-0.377023	0.243802	0.226481	4.09675	4.10869		0	-0.741944	0.778221	0.321861	0.790508	1.33776		0	-2.74132	2.77718	1.72524	5.6283	7.19785
CADPS	0		0	-3.2372	0.0757409	2.04393	2.91483	2.94463		0	-1.67405	0.255971	1.96721	0.278097	0.451384		0	-0.557926	3.39149	6.3956	2.1994	2.4041
CADPS2	0		0	1.74778	2.25685	2.55003	6.91418	6.4571		0	0.52248	0.859508	0.515587	4.15648	3.63872		0	2.73702	2.45275	3.24544	9.932	8.68485
CAGE1	0		0	-1.71652	0.018127	0.0391694	3.10386	3.12603		0	-1.39542	0.00235054	0.00718499	0.165157	0.158766		0	0.166562	0.323178	0.253463	0.4792	0.5375
CALB1	0		0	-1.99399	0.000990684	0.671407	2.77151	2.78936		0	2.01385	0.192935	0.0470087	0.595341	0.386347		0	0.3383	0.905886	1.21869	0.5843	0.5429
CALB2	0		0	-1.82445	4.74056e-05	0.933204	2.3601	2.36766		0	-1.8616	0.0743615	2.53056	0.272979	0.507383		0	-2.03289	2.97677	9.10765	2.7158	3.46325
CALCA	0		0	3.58877	10.8089	0.524802	2.93188	2.92576		0	3.83069	6.10996	0.123776	0.845225	0.507181		0	4.24382	11.2257	0.905886	2.7006	0.4164
CALCB	0		0	2.16487	1.49119	0.000235117	2.50316	2.50583		0	2.28024	1.22905	0.111772	0.322985	0.187742		0	1.41808	4.407	2.99946	0.7465	0.4462
CALCOCO1	0		0	1.9373	0.571611	0.558782	8.38198	7.9983		0	3.47235	0.333085	0.170908	5.26358	4.5182		1.56686	5.96376	0.547359	0.872306	11.5207	10.25
CALCOCO2	1		2.49646	5.61732	0.538445	0.541931	9.82383	9.15402		0.245031	5.45602	0.221311	0.280841	5.75407	4.61565		0	3.2928	0.240753	0.453811	11.6139	10.9997
CALCR	0		0	-3.18712	0.00448576	0.0382337	2.85912	2.91265		0	-3.14764	0.0139611	0.0505029	0.159775	0.415168		0.200444	-4.83543	0.734381	1.98533	1.2216	3.10025
CALCRL	0		0	-1.90299	1.71073	1.56052	3.87821	4.11181		0	-1.19944	1.41451	0.700198	3.13248	3.27026		0	2.05542	1.56803	1.13819	8.8752	8.105
CALD1	1		8.91367	8.92619	0.147765	0.602767	14.2069	13.2033		0	3.61724	0.10522	0.560606	8.19872	7.63768		3.28969	7.41271	0.46337	0.986066	15.5582	13.8237
CALHM1	0		0	-1.07268	0.0317923	0.141619	2.27186	2.27066		0	-1.84105	0.0117678	0.055692	0.196859	0.257632		0	0.676495	0.621249	0.780852	1.5896	1.416
CALHM2	1		2.91645	-5.83592	0.923797	0.99292	7.26713	8.59012		0.0181826	-5.21007	0.224352	0.300606	3.32088	4.30321		0	-2.24422	0.378726	0.412861	9.4972	10.0176
CALHM3	0		0	-2.00951	3.71646e-05	0.000102363	2.18078	2.18421		0	-1.13507	0.00634208	0.214017	0.0450299	0.0563129		0	-1.61749	0.417648	1.9868	0.5972	0.89515
CALM1	0		0	1.23556	0.0758457	0.112829	13.7761	13.7915		1.1241	6.4353	0.178257	0.170794	7.20584	6.23732		0	2.24087	0.186174	0.428524	13.672	13.2969
CALML3	0		0	-1.61431	0.00055594	0.00880724	2.68862	2.69506		0	0.667647	0.0272269	0.0014543	0	0		0	-1.31629	0.495999	2.50488	0	0.2103
CALML4	0		0	0.331193	1.08721	0.781048	7.35159	7.33982		0	1.98999	0.121811	0.231314	3.04927	2.77612		0.7113	5.25824	0.276547	0.251114	8.6704	7.95585
CALML5	0		0	-1.02087	0.000152427	0.00198653	2.04636	2.04757		0	-0.707805	0.000558403	0.00306944	0	0		0	-0.908026	0.377036	1.14384	0	0
CALML6	0		0	-1.13336	0.000738659	0.671083	2.23351	2.24483		0	-0.0483678	0.0701622	0.0459438	0.227051	0.25892		0	-0.846792	0.676221	2.25497	0.9865	0.9588
CALN1	0		0	0.631643	0.0675753	0.0195154	2.57384	2.58406		0	0.0892197	0.438117	0.444109	0.390875	0.276322		0	0.241161	7.8413	5.46458	2.3921	2.3081
CALR	0		0.453864	-4.41891	0.27031	0.431488	9.39061	9.93981		0	-4.68129	0.0639739	0.114682	7.1639	7.70491		0.561054	-5.13407	0.28904	0.541143	13.6362	14.5205
CALR3	0		0	-0.26098	0.000436792	0.00038779	2.43011	2.43199		0	-1.49838	0.00459597	0.00736093	0.0643715	0.0997351		0	0.988515	0.279602	0.173155	0.4462	0
CALY	0		0	-1.41705	2.49741e-05	0.440659	2.08028	2.08108		0	-0.699722	0.00502223	0.0510689	0	0		0	-2.35205	0.557739	1.02017	0	0.8548
CAMK1	1		6.08437	7.39297	0.750843	1.46388	7.03364	5.41799		0	4.23923	0.128327	0.652019	4.54762	3.27481		3.32762	7.44547	0.201594	0.630301	10.2381	8.82085
CAMK1D	0		0.762218	-4.61623	0.720269	0.838777	7.34012	8.30299		0	-4.05038	0.259521	0.315239	3.03469	3.7587		0	-1.82512	0.522953	0.641538	6.547	6.7776
CAMK1G	0		0	-2.16952	6.52787e-05	0.254315	2.21988	2.22277		0	-0.299927	0.230804	0.148898	0.118947	0.188519		0	-0.757021	3.39839	2.69639	2.1654	3.0971
CAMK2A	0		0	-0.172889	0.143264	0.494213	2.28737	2.28754		0	1.5994	0.792962	0.257653	1.36594	0.972216		0	1.03356	5.25877	8.55122	6.2563	5.55565
CAMK2B	0		0	-1.39226	0.0582985	0.669397	2.54315	2.55344		0	1.55835	0.164571	0.0480598	0.269229	0.246941		0	-0.571359	2.56453	13.0377	4.3526	4.44115
CAMK2D	0		0	-1.66703	0.625597	0.996201	10.4419	10.8833		0	-2.6039	0.19719	0.252761	4.86576	5.11579		0	-0.426585	0.290309	0.852646	10.4514	10.4688
CAMK2G	0		0	4.1404	1.769	0.924836	7.32373	6.08595		0	5.16979	1.04602	0.0900604	4.24594	3.19277		3.61197	7.69179	0.528755	0.417929	10.7053	9.244
CAMK2N1	1		4.05866	-6.39862	3.63824	5.40805	6.5235	9.56341		0	-3.86579	1.30708	2.5351	1.35074	4.80051		0	-2.28949	2.73537	2.9017	8.0284	8.34945
CAMK2N2	0		1.96303	5.63599	2.03392	0.324376	3.34611	2.00781		0	1.59523	2.20972	1.38347	3.24747	1.94203		0	2.60975	4.49373	3.22474	7.6223	5.75255
CAMK4	0		0	0.0580758	0.336489	0.404332	2.67954	2.66704		0	-0.574522	0.331018	0.412584	1.2705	1.2469		0	0.670608	2.60809	3.51458	4.9571	4.94655
CAMKK1	0		0	-0.00434736	0.965224	0.781295	5.53066	5.52445		0	-0.434575	0.559607	0.843893	2.47892	2.99271		0	-1.22311	0.980851	1.1932	8.3957	8.7411
CAMKK2	0		0	0.108482	0.723109	0.700783	9.38085	9.21161		0	2.02841	0.239473	0.0965939	4.19856	3.95478		0	3.3668	0.317225	0.338043	10.9337	10.4
CAMKV	0		0	-0.914883	0.0013938	0.225457	1.93219	1.93267		0	-0.307574	0.000607951	0.000740581	0.0226598	0.018442		0	-1.93187	0.413364	3.15215	0.3939	0.65355
CAMLG	0		0	2.4206	0.348134	0.333519	10.4839	10.3326		0	1.88441	0.209757	0.139249	4.63168	4.425		0	2.90618	0.313957	0.241772	10.2325	9.92955
CAMP	0		0	-2.69606	0.0119857	0.0349964	3.75856	3.81901		0	-1.27958	0.00844092	0.0198037	0	0		0	-0.706128	0.0464576	0.360412	0	0
CAMSAP1	0		0	4.09278	0.241552	0.544842	6.98535	6.28039		0	-0.19946	0.133517	0.20453	3.69859	3.71748		0	1.30127	0.212939	0.533903	10.0377	9.6493
CAMTA1	0		0	2.83737	0.405718	0.413702	10.7922	10.1647		0	0.789198	0.274503	0.162713	5.22776	4.99314		0	-1.7955	0.227186	0.625202	9.0022	9.2546
CAMTA2	1		6.12173	-7.51571	0.139167	0.527819	4.05037	4.6882		0	-3.14646	0.0897561	0.253281	2.73905	3.37804		0	-1.44021	0.25169	0.46159	10.0917	10.3506
CAND1	0		0	-3.48735	0.329054	0.532212	9.2004	9.60325		0	-3.12116	0.0568357	0.0566648	5.40376	5.66322		0	-3.03924	0.192733	0.178237	10.7657	11.2127
CAND2	1		9.7802	9.3017	0.660788	2.38311	8.64438	6.31325		1.03054	6.3285	0.142709	0.519265	3.4973	1.9782		0.346132	4.95594	0.153673	4.02722	9.7339	7.94625
CANT1	0		1.77687	-5.20374	0.597455	0.705769	7.46326	8.47576		0	-4.50873	0.205146	0.147744	3.83703	4.42588		0	-4.4456	0.108061	0.221861	10.1422	10.6842
CANX	0		0	0.847443	0.19628	0.160055	11.9463	11.8313		0	-0.877724	0.0949917	0.183977	7.26488	7.54915		0	0.366994	0.219242	0.671114	13.873	13.7072
CAP1	0		0.775006	4.65532	0.11533	0.535583	12.6221	12.2217		0	3.46625	0.130026	0.151206	7.24106	6.59252		0	2.96967	0.104411	0.313883	13.3911	13.0989
CAP2	1		11.0556	10.4514	0.73036	6.50765	9.31046	5.41085		1.39572	6.74958	0.353611	1.75931	4.28875	1.26983		0	3.65258	0.420025	7.21683	10.4319	8.2653
CAPG	0		0	-2.92047	2.84228	4.42152	7.10419	8.128		0	-2.44165	1.14155	1.18688	4.04893	5.22022		0	-3.34322	1.54995	3.72885	9.4679	11.1361
CAPN1	0		0	-4.12755	0.23232	0.42414	6.82078	7.17034		0	-0.556846	0.0771936	0.110563	4.68167	4.66127		0	-0.238213	0.226078	0.19747	11.5205	11.4062
CAPN10	0		0	-1.52646	0.335902	0.585221	4.14689	4.33281		0	1.14236	0.171833	0.266512	3.1174	2.91928		0	-0.44646	0.28147	0.212941	8.2987	8.249
CAPN11	0		0	-1.27245	0.000160076	0.00766021	2.41716	2.41889		0	-2.61295	0.0252406	0.0130237	0.148083	0.286513		0	-0.918132	1.0806	2.48511	3.1532	3.4641
CAPN12	0		0	-1.69559	0.0142269	0.0644179	2.72843	2.74213		0	3.18997	0.351911	0.212041	3.13865	2.54493		0	-0.592864	0.710525	1.47786	6.2926	6.4
CAPN13	0		0	-2.1543	0.0684265	0.100192	3.47887	3.54968		0	-2.29461	0.00740196	0.0753089	0.00722135	0.113517		0	-1.27876	0.117783	0.901541	0	0
CAPN14	0		0	-1.88522	0.0025288	0.00318095	2.82826	2.84571		0	-0.54515	0.0266152	0.042242	0.118806	0.118951		0	-0.594961	0.898989	2.56576	1.6409	1.4848
CAPN2	0		0	3.69375	0.30371	0.476228	12.2749	11.8691		0	4.02381	0.0927082	0.250683	6.75829	6.03846		0	2.2801	0.139007	0.365275	12.9012	12.5253
CAPN3	0		0	3.76943	1.94835	3.05622	7.11457	5.45143		0	4.147	0.297737	0.561201	3.92531	2.81019		0	2.42496	0.773318	4.39853	7.8001	6.12585
CAPN5	0		0	-1.68904	0.858973	1.10361	3.27623	3.83351		0	-0.812146	0.593603	0.406686	1.88358	2.45415		0	-0.186776	1.20607	1.58329	9.0327	9.1072
CAPN6	1		5.49468	8.02535	9.24783	1.00126	7.61843	2.61883		0.712695	5.97084	3.21307	1.06223	3.89214	0.160053		2.22251	6.50828	12.0945	8.06493	10.9592	4.452
CAPN7	0		0	2.06179	0.426189	0.457206	8.93227	8.56289		0	4.04649	0.124823	0.0877579	4.81901	4.38935		0	2.33375	0.113915	0.389044	9.8344	9.49035
CAPN8	0		0	-1.04651	0.000109791	0.000108172	2.30206	2.305		0	3.32637	0.0566798	0.00257304	0.10619	0.0281441		0	1.56949	0.982148	0.652896	0.9449	0.57875
CAPN9	0		0	-1.02045	1.64122e-05	2.26425e-05	2.10564	2.1073		0	-2.16401	0.00342282	0.00320475	0	0.0653155		0	-3.62763	0.0972211	0.756541	0	0.86685
CAPNS1	0		0	-1.85908	0.500599	0.292707	10.746	11.1187		0	-0.0613817	0.141949	0.0594768	6.44324	6.37235		0	-3.42922	0.226219	0.309993	12.6753	12.9827
CAPNS2	0		0	-1.79145	1.85024e-05	2.03444e-05	1.9722	1.97415		0	-3.22531	0.16612	0.467521	0.59268	1.19831		0	-1.35169	0.328816	0.686839	0.5466	0.7366
CAPRIN1	0		0	-3.62228	0.473412	0.386149	10.6333	10.9707		0	0.277046	0.0948944	0.136902	5.94534	5.78867		0	-1.76193	0.221271	0.232962	12.0006	12.1168
CAPRIN2	0		0	-3.5368	0.428034	0.853327	8.36694	8.9697		0	-1.56104	0.150179	0.272159	3.33142	3.69166		0	0.0347206	0.35516	0.424106	8.5468	8.54425
CAPS	0		0	-0.127015	0.36456	0.640582	6.88092	6.65307		0	0.44192	0.333431	0.466346	3.02277	3.16135		0	-0.625802	0.679094	3.98586	7.5447	7.42715
CAPS2	0		0	1.06071	0.57732	1.12184	3.19745	3.06122		0	3.11963	0.219258	0.366805	2.20742	1.47906		0	3.83226	0.673496	1.75452	4.8808	3.79205
CAPSL	0		0	-0.90908	0.0013235	0.132781	2.21668	2.21569		0	0.570847	0.105919	0.0382089	0.0838626	0.0721799		0	-1.6763	0.989549	3.04173	0.4833	0.72535
CAPZA1	0		0	-3.27915	0.235055	0.438551	11.0161	11.4537		0	-4.82681	0.15858	0.102411	5.57862	6.24305		0.313852	-4.92927	0.289835	0.231652	10.831	11.5265
CAPZA2	0		0	2.79316	0.335956	0.379921	11.6258	11.3498		0	2.04631	0.125157	0.174583	6.58931	6.14248		0	1.48559	0.201663	0.16791	11.6357	11.3415
CAPZA3	0		0	-0.564745	0.000128721	0.000144143	2.27246	2.27401		0	2.06283	0.183572	0.00727523	0	0		0	1.86901	1.19302	0.0429228	0	0
CAPZB	1		4.18542	-6.4635	0.337142	0.738037	10.2084	11.2518		0.362754	-5.58447	0.13764	0.353812	5.99606	7.09765		0	-4.4344	0.22822	0.620109	12.1914	13.077
CARD10	1		3.0425	-5.87652	0.978123	2.17207	4.01735	5.84033		0	-4.12853	0.164392	0.62046	0.971508	1.98551		0.588896	-5.15706	0.902116	1.77894	7.0214	8.692
CARD11	0		0	-1.41481	0.106065	0.126525	4.01639	4.10192		0	-2.03095	0.167726	0.384625	0.677494	1.06833		0	-3.42692	2.26844	2.97519	5.5764	6.75135
CARD14	0		0	-2.14088	0.0271387	0.0717606	3.30949	3.37159		0	-0.729909	0.10796	0.14238	0.910178	0.758312		0	-2.8227	0.610039	0.918639	3.2144	3.7875
CARD16	0		0	-0.0515268	2.89677	3.04187	7.51618	7.64427		0	-0.103044	0.812476	0.704379	2.96382	3.1744		0	-1.54604	1.85631	1.87383	6.8775	7.61895
CARD18	0		0	-0.211954	5.66874e-05	6.36975e-05	2.2004	2.20217		0	-1.70916	0	0.054491	0	0		0	-1.8058	0	0.843222	0	0
CARD6	0		1.70564	-5.15586	2.05023	2.75185	6.59851	8.44806		0	-2.68008	0.65908	0.651802	2.09751	3.2045		0	-1.69546	1.20439	1.06946	7.419	7.93265
CARD8	0		0	-2.64862	0.735227	0.425505	7.45353	7.54847		0	-3.25037	0.162756	0.0875173	3.83948	4.21263		0	-3.14004	0.221584	0.259691	9.0097	9.42135
CARD9	0		0	-3.95519	0.011947	0.154379	3.21855	3.3007		0	-3.21407	0.184015	0.269841	1.10073	1.71233		0.51142	-5.09319	1.43999	1.81732	4.7729	6.6323
CARHSP1	0		0	3.50069	0.930859	0.934171	8.96898	8.39768		0	4.10426	0.576256	0.124053	4.62406	4.03036		0	3.68395	0.694932	0.679364	11.2902	10.1516
CARM1	0		0	-1.71812	0.74734	0.49421	7.76	8.15126		0	-2.7903	0.178548	0.145397	4.35739	4.61557		0	-1.21611	0.382346	0.231459	10.7841	10.9138
CARNS1	0		0	2.54377	1.0295	0.220139	2.1885	2.12627		0.126985	5.32787	0.352271	0.0929262	1.45055	0.820363		0.438794	5.03288	1.41567	5.13317	7.5648	4.1648
[truncated: 20,468 more rows]

## Sheet: TS4B DE - miRNA
Supplementary Table S4B: Results of differential miRNA expression analyses in ICGC and TCGA cohorts
Columns description: ID: mature miRNA symbol; logFC: hLMS/oLMS log Folg Change returned during the statistical test; median: gene expression median with each LMS group (hLMS and oLMS);
p-value adjusted: -log10 of statistical test p-values adjusted for multi-testing with Holm's method; Significance indicates if the miRNAs was significantly DE in TCGA, ICGC or both (TCGA+ICGC).
The statistical tests are indicated next to the cohort name.
	ICGC: edgeR + GLMfit					TCGA: limma
ID	median hLMS	median oLMS	logFC	adjusted p-value		median hLMS	median oLMS	logFC	adjusted p-value	Significance
hsa-miR-455-3p	2.7613	6.67199	-4.24712	3.42446e-11		3.78491	8.73236	-5.63748	6.91947e-16	TCGA+ICGC
hsa-miR-199b-5p	6.5718	15.0943	-6.9007	5.41308e-10		1.74258	9.0368	-6.22583	4.28518e-15	TCGA+ICGC
hsa-miR-455-5p	4.72332	8.93724	-3.72771	1.76164e-09		1.57624	5.73002	-4.09744	6.83644e-18	TCGA+ICGC
hsa-miR-143-3p	19.0314	14.2319	3.8876	7.19782e-09		19.261	15.565	3.69322	7.46893e-20	TCGA+ICGC
hsa-miR-28-3p	12.9854	10.7623	2.36311	2.24609e-08		12.8115	11.6188	1.148	0.00207727	TCGA+ICGC
hsa-miR-424-3p	5.32437	7.91231	-2.83868	3.51394e-08		0.443232	2.64423	-2.32422	1.89688e-14	TCGA+ICGC
hsa-miR-143-5p	11.9305	8.83887	3.05257	2.07732e-07		7.89824	5.7419	1.77346	0.0981985	ICGC
hsa-miR-145-3p	12.4637	8.94951	2.62447	3.1309e-07		7.83159	5.3509	2.17546	7.28588e-08	TCGA+ICGC
hsa-miR-424-5p	4.54441	7.40441	-3.09303	5.21037e-07		3.37644	7.60927	-4.16929	2.07405e-14	TCGA+ICGC
hsa-miR-28-5p	11.4323	9.2826	2.13264	8.49722e-07		7.49394	6.29388	1.16566	7.38058e-07	TCGA+ICGC
hsa-miR-503-5p	3.92757	6.74519	-2.85723	1.29938e-06		1.96982	4.98356	-3.35352	9.1022e-11	TCGA+ICGC
hsa-miR-145-5p	14.8714	11.2551	3.15264	2.17353e-06		12.725	10.5571	2.01927	2.69562e-05	TCGA+ICGC
hsa-miR-154-3p	0	2.47637	-5.54456	2.34315e-06		0	3.20769	-2.96267	2.02058e-11	TCGA+ICGC
hsa-miR-431-5p	0	3.91696	-5.1915	6.34153e-06		0	2.02269	-2.61817	1.09979e-06	TCGA+ICGC
hsa-miR-758-3p	0.871159	5.40439	-5.47314	8.53995e-06		0.433525	6.65203	-4.99541	2.21377e-13	TCGA+ICGC
hsa-miR-154-5p	0.468023	3.67908	-5.0947	2.25581e-05		0.18	4.06652	-3.47191	5.24997e-13	TCGA+ICGC
hsa-miR-377-5p	0.282493	3.75114	-4.76341	4.87948e-05		0	3.38066	-2.61966	7.2435e-11	TCGA+ICGC
hsa-miR-133a-5p	6.55077	1.07332	4.49225	8.2551e-05		1.51503	0	0.537923	1	ICGC
hsa-miR-1-3p	13.854	7.33656	4.69777	8.32482e-05		8.86781	3.75387	3.27248	0.0067279	TCGA+ICGC
hsa-miR-485-5p	0.12107	3.58611	-4.74698	0.000116307		0	1.3315	-1.38675	3.51258e-11	TCGA+ICGC
hsa-miR-487a-3p	0	3.14936	-4.5227	0.000168882		0	1.5663	-1.63707	1.13217e-06	TCGA+ICGC
hsa-miR-299-5p	0.531326	4.00644	-5.00133	0.000182384		0.1631	3.96497	-3.94539	1.78486e-13	TCGA+ICGC
hsa-miR-376c-3p	0	4.44137	-4.72361	0.000213531		0.3341	4.22143	-3.58027	5.08366e-11	TCGA+ICGC
hsa-miR-485-3p	1.14138	5.28729	-4.71665	0.000227278		0.179	5.28663	-4.10073	1.10521e-12	TCGA+ICGC
hsa-miR-337-3p	0.966066	4.9946	-4.65788	0.00032676		1.0367	7.28258	-5.36267	5.14429e-12	TCGA+ICGC
hsa-miR-29c-5p	5.63619	3.26511	2.48621	0.000351488		3.83787	3.33319	0.526985	1	ICGC
hsa-miR-654-3p	3.35075	8.26113	-4.68464	0.000430657		1.00123	7.79478	-5.49156	6.24088e-13	TCGA+ICGC
hsa-miR-487a-5p	0.343733	3.25227	-4.27178	0.000493664		0	2.418	-1.99711	5.64601e-09	TCGA+ICGC
hsa-miR-548b-3p	1.84744	0.25601	3.29511	0.000668204		1.29449	0.3803	0.921947	0.00236466	ICGC
hsa-miR-136-5p	0	1.96812	-4.01428	0.000803599		0.938637	6.52992	-4.90604	6.33162e-13	TCGA+ICGC
hsa-miR-493-5p	4.36684	9.35047	-4.70578	0.000825303		0.33858	5.93754	-4.49069	9.66623e-13	TCGA+ICGC
hsa-miR-323a-3p	0.796341	4.81358	-4.58221	0.00082669		0.1062	4.70092	-4.10178	4.28837e-14	TCGA+ICGC
hsa-miR-409-3p	2.95409	8.10556	-4.33392	0.00104212		0.833161	6.86465	-5.01898	1.37506e-12	TCGA+ICGC
hsa-miR-382-5p	2.12186	7.53155	-4.70378	0.00124299		0.6526	6.82588	-4.99633	1.37096e-13	TCGA+ICGC
hsa-miR-127-5p	0.48887	3.90307	-4.35556	0.00222958		2.81692	10.0897	-5.91392	8.95998e-12	TCGA+ICGC
hsa-miR-409-5p	1.7188	6.89666	-4.35349	0.00254452		0.4015	5.66236	-4.1132	3.78902e-11	TCGA+ICGC
hsa-miR-134-5p	1.7569	6.99641	-4.48087	0.00304085		2.90802	10.3863	-6.4353	1.84133e-12	TCGA+ICGC
hsa-miR-127-3p	6.37935	11.4506	-4.34817	0.00324457		4.24617	11.054	-5.55581	2.28848e-10	TCGA+ICGC
hsa-miR-30c-5p	12.5972	11.5007	1.02278	0.00328191		8.41534	9.18723	-0.944031	0.149398	ICGC
hsa-miR-199a-5p	13.9814	16.3402	-1.93906	0.00437257		8.9874	12.0176	-2.95336	8.54159e-09	TCGA+ICGC
hsa-miR-654-5p	0.645524	4.2875	-4.28913	0.00468719		0.0955	3.34913	-2.98196	5.3041e-13	TCGA+ICGC
hsa-miR-432-5p	1.21849	5.54212	-4.04001	0.00574615		0.482092	5.5272	-4.48591	2.20972e-10	TCGA+ICGC
hsa-miR-370-3p	3.48444	8.47675	-3.82132	0.00653657		0.3013	5.02279	-4.01832	2.64299e-12	TCGA+ICGC
hsa-miR-582-5p	7.9851	5.03061	2.53642	0.00702753		4.60198	3.14508	0.946115	1	ICGC
hsa-miR-22-5p	7.13058	8.41737	-1.28003	0.00831527		2.77944	6.02863	-3.09285	5.36249e-14	TCGA+ICGC
hsa-miR-493-3p	1.82827	6.65111	-4.19503	0.00835996		0.2518	4.36567	-3.78273	1.08364e-13	TCGA+ICGC
hsa-miR-450a-5p	7.72414	10.1773	-2.38855	0.00879849		0.994815	4.8537	-3.70375	1.44169e-15	TCGA+ICGC
hsa-miR-487b-3p	1.70373	5.46701	-3.91416	0.013495		0.175845	5.22202	-4.05389	3.18743e-12	TCGA
hsa-miR-329-3p	1.24757	5.76734	-3.78573	0.0164487		0	2.66487	-2.49201	1.69113e-07	TCGA
hsa-miR-136-3p	1.24773	6.22804	-4.15198	0.0167504		0.550417	5.22198	-4.23014	1.37786e-12	TCGA
hsa-miR-181c-5p	5.7729	3.80617	1.88598	0.0170077		5.21835	4.5461	0.737462	1	no
hsa-miR-369-5p	0.883918	4.95768	-3.59324	0.0173282		0.167	3.40807	-2.82905	1.33966e-09	TCGA
hsa-miR-27a-5p	5.16263	7.24899	-1.86607	0.0174155		1.2643	3.86194	-2.35797	1.11271e-09	TCGA
hsa-miR-582-3p	6.35725	3.33837	2.67988	0.0174155		8.95792	7.53948	1.16594	1	no
hsa-miR-22-3p	11.7668	12.7708	-1.20702	0.0222714		14.2811	16.9486	-2.55837	7.87744e-15	TCGA
hsa-miR-181a-3p	6.22379	7.93852	-1.56129	0.0225407		5.20139	8.33823	-3.28696	2.93759e-11	TCGA
hsa-miR-379-5p	3.3871	9.29772	-4.01467	0.0236889		4.51636	11.8274	-6.17754	1.14406e-10	TCGA
hsa-miR-450b-5p	4.9983	7.45329	-2.5742	0.02371		1.79858	6.3336	-4.05456	6.37052e-14	TCGA
hsa-miR-656-3p	0.387067	4.82613	-4.01707	0.0254815		0	1.6492	-1.83039	1.32366e-07	TCGA
hsa-miR-655-3p	0.453452	4.50784	-4.05876	0.0310939		0	3.59823	-3.39256	3.65164e-11	TCGA
hsa-miR-382-3p	0.954535	5.75938	-3.85828	0.035482		0.0931	3.4368	-2.94371	1.1345e-10	TCGA
hsa-miR-299-3p	0	3.85945	-3.8044	0.0395931		0	2.37569	-2.29561	1.2531e-08	TCGA
hsa-miR-671-5p	0.611994	1.76029	-1.61786	0.0435006		1.06332	3.07212	-1.98945	6.23698e-10	TCGA
hsa-miR-148a-5p	4.36781	6.92346	-2.17536	0.0453308		1.17899	3.52731	-2.16315	3.3872e-06	TCGA
hsa-miR-195-3p	7.35684	5.8309	1.73257	0.0459616		2.79615	2.95791	0.219741	1	no
hsa-miR-451a	8.49309	9.67789	-2.1811	0.0494081		4.40014	6.3864	-2.70824	0.0252941	no
hsa-miR-542-3p	3.83288	6.25073	-2.33574	0.0534316		5.07468	9.08642	-4.19392	3.50167e-13	TCGA
hsa-miR-411-5p	1.35368	7.22624	-3.76762	0.054597		0.30962	4.59346	-3.65428	2.25262e-09	TCGA
hsa-miR-433-3p	1.60232	5.48004	-3.24258	0.0617012		0.0955	2.91921	-2.59263	1.44049e-08	TCGA
hsa-let-7c-3p	2.59952	4.96747	-1.96358	0.0767012		2.26688	4.09268	-2.72515	4.446e-05	TCGA
hsa-miR-6511b-3p	2.19776	0.483307	2.49567	0.0801818		1.44852	1.71078	-0.139863	1	no
hsa-miR-483-5p	1.06833	3.09064	-2.78828	0.0812431		0.698311	3.16385	-3.22387	3.11582e-05	TCGA
hsa-miR-511-5p	4.84308	6.03815	-1.51118	0.0812431		1.51176	3.37145	-1.76225	0.0008991	TCGA
hsa-miR-494-3p	0	3.221	-3.34574	0.0968508		0	2.89641	-2.71062	2.55078e-11	TCGA
hsa-miR-323b-3p	0.548838	4.5415	-3.45959	0.0973085		0.1062	4.59661	-3.62908	3.52542e-11	TCGA
hsa-miR-483-3p	1.03592	2.8432	-2.84551	0.10862		0.544242	3.03635	-3.38708	5.03772e-05	TCGA
hsa-miR-381-3p	3.88992	9.07355	-3.51218	0.115102		1.578	7.27414	-4.51157	5.09501e-08	TCGA
hsa-miR-361-3p	11.3165	10.3428	0.864214	0.11724		6.33209	7.15728	-1.03419	0.121652	no
hsa-miR-144-5p	2.26925	3.28194	-2.05492	0.137391		3.09282	4.66235	-2.00802	1	no
hsa-miR-27b-5p	6.85185	5.36972	1.37128	0.138278		4.22444	4.34519	0.098389	1	no
hsa-miR-410-3p	0.695764	4.81896	-3.06499	0.138365		0.5532	5.69165	-4.06646	1.19467e-09	TCGA
hsa-miR-29b-1-5p	1.34396	2.14041	-1.96431	0.14837		0.845895	2.75069	-1.96821	3.6645e-11	TCGA
hsa-miR-708-5p	5.53305	7.68382	-2.21687	0.14837		2.74359	4.95207	-2.24615	0.00346121	TCGA
hsa-miR-539-3p	0	3.01599	-3.42524	0.159779		0	2.01196	-2.07795	3.14411e-08	TCGA
hsa-miR-369-3p	1.08515	6.07115	-3.48551	0.192242		0.449871	5.47011	-4.28281	3.72078e-12	TCGA
hsa-miR-218-5p	5.82553	8.286	-1.95227	0.221709		3.06678	6.94497	-3.09047	1.3244e-07	TCGA
hsa-miR-95-3p	8.00617	6.2086	1.89919	0.235838		1.54058	1.92343	-0.444427	1	no
hsa-miR-889-3p	0.922253	5.68288	-3.23265	0.343851		0.8302	7.23937	-5.01352	1.74496e-12	TCGA
hsa-miR-142-3p	5.315	7.02567	-2.02407	0.375799		7.04305	10.577	-3.38476	1.37137e-07	TCGA
hsa-miR-328-3p	8.48577	7.75732	2.93153	0.426971		4.23098	5.08004	-0.979249	1	no
hsa-miR-188-5p	1.15334	1.98924	-1.35751	0.460528		0.735072	1.83348	-1.44524	1.33004e-05	TCGA
hsa-miR-29b-2-5p	2.2542	0.531609	1.80082	0.584648		3.83676	3.1654	0.432995	1	no
hsa-miR-377-3p	0	2.25077	-2.77855	0.81613		0	2.1436	-2.11122	2.27491e-09	TCGA
hsa-miR-132-3p	5.58712	7.70467	-1.30188	0.831332		5.30053	7.25338	-2.15455	1.34006e-07	TCGA
hsa-let-7i-5p	15.5904	14.9616	0.947918	0.841126		8.33159	9.10807	-0.854261	0.29928	no
hsa-miR-3117-3p	2.21823	0.351705	2.28512	0.917236		1.17296	0	0.578475	1	no
hsa-miR-146a-5p	9.05227	10.5869	-1.35334	0.918381		3.09168	5.44182	-2.23376	0.00498056	TCGA
hsa-miR-128-1-5p	1.61994	2.31598	-0.965859	0.976478		1.24412	2.47509	-1.32709	2.50834e-07	TCGA
hsa-miR-340-3p	5.03437	5.13645	-0.120653	1		1.73218	3.9346	-2.12051	2.90799e-14	TCGA
hsa-miR-671-3p	4.45856	5.36622	-0.563305	1		0.665846	2.37569	-1.61499	1.66402e-12	TCGA
hsa-miR-766-3p	1.86785	2.99823	-0.817921	1		0.8947	3.11794	-2.38857	2.44458e-12	TCGA
hsa-miR-146b-3p	4.11247	5.74346	-0.657575	1		2.83988	5.97188	-3.33505	2.4863e-12	TCGA
hsa-miR-495-3p	1.98138	5.54212	-2.04959	1		0.3167	5.37821	-4.13985	1.03802e-11	TCGA
hsa-miR-340-5p	8.4929	9.12784	-0.583823	1		2.77443	4.59179	-1.86654	7.32315e-11	TCGA
hsa-miR-1307-3p	6.61758	6.97479	-0.141851	1		7.34629	10.1983	-2.6533	1.36938e-10	TCGA
hsa-miR-32-5p	3.27691	4.29581	-0.939149	1		1.79069	3.89464	-2.14076	1.4688e-10	TCGA
hsa-miR-500a-3p	5.18367	5.98621	0.171243	1		6.43348	8.93297	-2.7967	4.61693e-10	TCGA
hsa-miR-1296-5p	5.87369	6.30749	-0.034535	1		0.868599	3.51976	-2.29355	9.99428e-10	TCGA
hsa-miR-146b-5p	9.38964	10.4874	-0.728007	1		6.01268	9.47649	-3.44207	1.34548e-09	TCGA
hsa-miR-151a-5p	6.87668	7.02298	-0.0777733	1		4.73502	6.86943	-1.9959	1.55631e-09	TCGA
hsa-miR-543	3.04035	6.84741	-2.14197	1		0.1223	2.71114	-2.27537	4.43808e-09	TCGA
hsa-miR-32-3p	1.97896	2.89077	-1.20453	1		0	1.0153	-0.829215	5.20391e-09	no
hsa-miR-590-3p	1.37306	1.85766	-0.0843884	1		1.3234	2.74069	-1.39432	7.80688e-09	TCGA
hsa-miR-342-3p	8.13437	8.46972	-0.319027	1		5.23087	6.98499	-1.6786	9.55104e-09	TCGA
hsa-miR-125a-3p	3.8641	4.22392	0.175382	1		1.08089	2.7407	-1.45369	1.12578e-08	TCGA
hsa-miR-186-5p	11.1114	11.2847	-0.142536	1		6.80945	8.64273	-1.72113	2.01347e-08	TCGA
hsa-miR-24-2-5p	2.72225	2.71616	0.111179	1		2.86719	4.90839	-2.02377	2.07205e-08	TCGA
hsa-let-7e-3p	5.49357	5.78067	0.0462194	1		2.15556	4.56185	-2.17302	3.38935e-08	TCGA
hsa-miR-374b-3p	4.396	4.01095	0.16682	1		0.868584	2.01609	-1.05098	3.58405e-08	TCGA
hsa-miR-197-3p	8.1231	8.50052	0.0129097	1		6.35792	8.5072	-2.21858	6.39154e-08	TCGA
hsa-miR-125b-1-3p	5.52078	5.61916	-1.13001	1		0.451602	1.64926	-1.25811	6.59579e-08	TCGA
hsa-miR-3613-3p	1.63463	2.1993	-0.400317	1		0.322963	1.33535	-1.01803	1.75169e-07	TCGA
hsa-miR-142-5p	2.53871	4.20588	-2.19913	1		2.43808	5.14906	-2.56969	3.26666e-07	TCGA
hsa-miR-130b-5p	5.96024	6.32258	-0.399023	1		3.07832	5.30471	-2.37117	3.32557e-07	TCGA
hsa-miR-629-5p	4.84728	5.19754	-0.105754	1		4.48745	6.73051	-1.96986	4.99551e-07	TCGA
hsa-miR-589-5p	5.35584	5.5603	0.263533	1		4.83829	6.42424	-1.54727	5.57574e-07	TCGA
hsa-miR-7-1-3p	3.14359	3.34055	-0.881998	1		2.39929	4.34027	-1.7124	6.49023e-07	TCGA
hsa-miR-214-3p	8.7554	10.0303	-1.0199	1		2.08769	4.70179	-1.99565	6.55167e-07	TCGA
hsa-miR-3613-5p	5.53612	5.92342	-0.582275	1		2.82655	4.95202	-2.02641	9.17667e-07	TCGA
hsa-miR-361-5p	9.33301	9.57446	-0.223949	1		6.91185	8.51781	-1.4506	1.38166e-06	TCGA
hsa-miR-324-5p	3.68106	4.27093	-0.741415	1		2.45733	5.00611	-2.16274	1.4987e-06	TCGA
hsa-miR-21-3p	6.99275	7.67044	-0.95779	1		8.66939	11.2827	-2.4322	1.84374e-06	TCGA
hsa-miR-6716-3p	1.93041	1.58747	0.171855	1		0.338222	1.0485	-0.704114	1.91624e-06	no
hsa-miR-140-5p	8.0597	8.25769	-0.969631	1		3.9832	6.41542	-2.37824	2.21533e-06	TCGA
hsa-miR-574-3p	9.49198	10.0259	-0.631206	1		5.41399	7.85294	-2.11	2.33299e-06	TCGA
hsa-miR-584-5p	2.73014	3.82431	-0.00898993	1		3.58213	5.50395	-2.24874	2.88748e-06	TCGA
hsa-miR-130b-3p	4.8495	5.33147	-0.544895	1		3.06446	5.67293	-2.07487	3.24753e-06	TCGA
hsa-miR-98-5p	9.70105	10.2391	-0.145684	1		4.64128	6.17792	-1.40311	5.81254e-06	TCGA
hsa-miR-324-3p	2.72669	3.12101	-0.514093	1		2.54402	4.15058	-1.66584	6.28637e-06	TCGA
hsa-miR-484	8.89337	8.75127	0.463631	1		4.11951	5.87234	-1.71566	8.23732e-06	TCGA
hsa-miR-92a-1-5p	1.81352	3.20173	-1.07684	1		0.3846	1.67272	-1.02004	8.59463e-06	TCGA
hsa-miR-532-3p	5.7178	6.08407	-0.683895	1		3.06874	5.48992	-2.26298	9.29167e-06	TCGA
hsa-miR-223-5p	2.32011	2.80098	-0.65777	1		0.614979	1.86954	-1.24283	1.06265e-05	TCGA
hsa-miR-148b-3p	11.2899	11.329	0.10026	1		5.10453	6.35822	-1.30148	1.48083e-05	TCGA
hsa-miR-130a-3p	5.77012	5.3503	0.208789	1		4.40396	6.42112	-1.86593	1.93227e-05	TCGA
hsa-miR-185-5p	9.13931	9.74646	-0.578216	1		4.63426	6.32159	-1.60481	2.09587e-05	TCGA
hsa-miR-125b-5p	14.1926	13.7975	0.305303	1		8.74465	10.5403	-1.77628	2.23458e-05	TCGA
hsa-miR-151a-3p	11.1728	11.0002	0.273178	1		9.56771	10.4551	-0.95519	2.27657e-05	no
hsa-miR-183-5p	3.02676	3.60322	0.64558	1		4.03643	6.81677	-3.17229	2.34827e-05	TCGA
hsa-miR-148a-3p	12.2011	14.5969	-1.60605	1		10.5963	13.9307	-3.48274	2.58647e-05	TCGA
hsa-miR-132-5p	4.7305	5.69543	-0.959685	1		0.3683	1.54745	-1.08754	4.0314e-05	TCGA
hsa-miR-616-5p	1.13787	1.31332	-0.475761	1		0.910584	2.42768	-1.4951	4.90681e-05	TCGA
hsa-miR-181a-5p	12.5443	13.025	-0.138272	1		9.38071	11.3355	-2.21808	5.02494e-05	TCGA
hsa-miR-342-5p	2.58114	2.95699	0.0567405	1		1.85013	3.18893	-1.34859	5.18377e-05	TCGA
hsa-miR-576-5p	3.95059	4.35801	-0.4366	1		2.806	4.26303	-1.50037	5.95843e-05	TCGA
hsa-miR-3605-3p	3.40063	3.03892	0.367173	1		0.6614	1.6299	-1.00478	7.00432e-05	TCGA
hsa-miR-221-5p	8.33836	7.95722	0.572391	1		0.809572	2.46294	-1.35059	7.25589e-05	TCGA
hsa-let-7d-3p	9.30072	9.16614	0.592854	1		7.4923	9.26714	-1.65302	7.91349e-05	TCGA
hsa-miR-744-3p	2.02727	2.73195	-0.614813	1		1.62769	4.12536	-2.26925	8.49243e-05	TCGA
hsa-miR-26a-2-3p	2.49066	3.46285	-1.0986	1		0.787849	2.61585	-1.66827	0.000139312	TCGA
hsa-miR-33a-3p	1.63624	2.01371	-0.0491722	1		0.350414	1.2671	-0.830406	0.000145005	no
hsa-miR-339-5p	8.29499	9.08501	-0.637398	1		3.20145	5.18392	-1.89634	0.000147159	TCGA
hsa-miR-1307-5p	2.97091	3.90336	-0.857147	1		5.23739	7.02057	-1.91093	0.000199296	TCGA
hsa-miR-23a-5p	1.05237	1.72079	-1.23628	1		0.618091	2.37569	-1.29649	0.000212636	TCGA
hsa-miR-93-3p	3.38969	3.7882	-0.392743	1		1.954	3.42615	-1.48781	0.00024667	TCGA
hsa-miR-874-3p	2.78084	4.33985	-0.99684	1		2.91978	5.33024	-2.06904	0.000248372	TCGA
hsa-miR-130a-5p	0.906104	1.38469	-0.458626	1		0.1265	1.09766	-0.721512	0.000256698	no
hsa-miR-505-3p	5.32058	4.43177	0.869215	1		4.13262	5.70476	-1.56611	0.000279974	TCGA
hsa-miR-362-3p	1.0862	1.4104	-0.66918	1		1.00239	2.17027	-1.24787	0.000299975	TCGA
hsa-miR-182-5p	4.31875	5.34664	-0.287952	1		6.20024	9.23901	-2.69681	0.000330433	TCGA
hsa-miR-149-5p	7.12708	6.09116	1.07436	1		2.95334	5.28144	-2.17507	0.000333424	TCGA
hsa-miR-500a-5p	3.21601	3.52011	-0.263515	1		1.87252	3.70748	-1.72118	0.000343689	TCGA
hsa-miR-491-5p	1.65231	1.40061	0.351126	1		0.4516	1.1783	-0.728633	0.00034765	no
hsa-miR-128-3p	10.4487	10.2119	0.24915	1		5.84906	7.05809	-1.29101	0.000440319	TCGA
hsa-miR-191-5p	13.2803	12.9007	0.339079	1		7.3424	9.1023	-1.72562	0.000471321	TCGA
hsa-miR-223-3p	5.03004	5.86013	-0.896079	1		4.48433	6.78481	-2.30498	0.000536401	TCGA
hsa-miR-92a-3p	12.5743	12.3992	0.303179	1		11.6345	12.8668	-1.52461	0.000574406	TCGA
hsa-miR-17-3p	2.91415	2.95699	-0.296231	1		6.45199	7.76916	-1.30072	0.000615988	TCGA
hsa-miR-374a-3p	5.41205	5.4717	0.320172	1		8.52253	10.1185	-1.22407	0.000631499	TCGA
hsa-miR-769-3p	2.20094	2.61666	-0.218499	1		0.52996	1.43413	-0.778201	0.000812518	no
hsa-miR-4677-3p	2.84642	2.99669	-0.0381137	1		2.26459	3.66938	-1.22131	0.000952676	TCGA
hsa-miR-423-3p	11.916	11.5441	0.816915	1		5.64647	6.97347	-1.3566	0.00119852	TCGA
hsa-miR-708-3p	3.48989	4.40279	-0.903947	1		3.90059	6.80363	-2.46179	0.00120635	TCGA
hsa-miR-30c-2-3p	5.94091	5.83567	0.483339	1		3.84823	5.46717	-1.41554	0.00123102	TCGA
hsa-miR-660-5p	5.87375	6.04546	-0.331672	1		5.28688	6.34644	-1.60613	0.0013482	TCGA
hsa-miR-615-3p	8.56526	7.44441	1.19855	1		1.205	3.01107	-1.51444	0.00146274	TCGA
hsa-miR-193b-5p	3.257	3.59144	0.584728	1		1.96569	3.47946	-1.4366	0.00147299	TCGA
hsa-miR-425-5p	7.3351	6.93896	0.408027	1		5.43589	6.70775	-1.40921	0.00168984	TCGA
hsa-miR-25-3p	12.3981	12.7328	-0.298984	1		11.7132	12.5686	-0.953397	0.00209778	no
hsa-miR-744-5p	8.74199	9.36069	0.310588	1		3.19047	4.88675	-1.74549	0.00220889	TCGA
hsa-miR-99b-5p	12.9486	12.3886	0.965647	1		13.5721	14.6251	-1.26378	0.00234014	TCGA
hsa-miR-326	1.60162	2.93214	-1.10798	1		0.389392	1.0954	-0.818329	0.00325264	no
hsa-miR-769-5p	8.29023	7.96985	0.441574	1		2.83239	3.96563	-1.18389	0.0033577	TCGA
hsa-miR-15a-5p	6.14412	6.10349	0.173648	1		6.53305	8.19736	-1.69673	0.00336441	TCGA
hsa-miR-99b-3p	7.51268	6.91884	0.877727	1		4.83675	6.19786	-1.28959	0.00367548	TCGA
hsa-miR-98-3p	0.609509	1.26523	-0.407602	1		0.4987	1.43413	-0.746649	0.00399631	no
hsa-miR-1301-3p	5.60725	6.06115	0.311064	1		1.82965	3.32568	-1.39037	0.00475267	TCGA
hsa-miR-21-5p	16.5122	17.133	-0.854522	1		16.5205	18.3443	-1.43856	0.00535785	TCGA
hsa-miR-2355-3p	2.67895	2.82302	0.124539	1		1.71147	3.02601	-1.21923	0.00581021	TCGA
hsa-miR-330-5p	3.64978	3.94192	-0.282047	1		2.26679	3.52043	-1.15507	0.0066642	TCGA
hsa-miR-1249-3p	2.01533	1.68192	0.802825	1		0.676743	1.53396	-0.966268	0.00668076	no
hsa-miR-126-5p	7.36531	8.48364	-1.34088	1		5.42654	7.27272	-1.67058	0.00844604	TCGA
hsa-miR-193b-3p	7.0827	7.27133	0.253192	1		5.00276	6.73197	-1.7075	0.0090311	TCGA
hsa-miR-345-5p	6.46567	6.29486	0.356144	1		2.02129	3.41291	-1.43746	0.00960272	TCGA
hsa-let-7g-5p	15.7892	15.3951	0.594525	1		8.59946	9.77373	-1.02855	0.0100195	no
hsa-miR-125a-5p	14.2822	13.6845	0.889323	1		8.6374	9.646	-1.07675	0.0107904	no
hsa-miR-15b-3p	6.2033	6.01113	0.428678	1		3.90827	5.20941	-1.23135	0.0114853	no
hsa-miR-532-5p	10.5183	10.8669	0.746387	1		9.15399	10.4341	-1.46199	0.0115137	no
hsa-miR-486-5p	6.61943	7.40052	-1.04328	1		4.61054	6.17291	-2.39975	0.0117666	no
hsa-miR-30b-5p	9.57288	9.55901	0.100205	1		6.46429	7.4503	-1.16332	0.013534	no
hsa-miR-625-3p	3.74291	3.98974	-0.301283	1		6.04602	7.60179	-1.55307	0.0135368	no
hsa-miR-191-3p	1.95522	2.14041	-0.491504	1		0.319902	1.12229	-0.737006	0.0180711	no
hsa-miR-106b-5p	7.45573	7.29038	-0.0691352	1		6.5168	7.43804	-1.07962	0.0190152	no
hsa-miR-140-3p	10.179	9.75633	-0.0204032	1		9.03272	10.6489	-1.51094	0.019893	no
hsa-miR-362-5p	6.49809	6.52141	-0.208047	1		2.79726	4.51187	-1.42812	0.0208586	no
hsa-miR-2110	3.54489	3.3011	0.409099	1		0.3382	1.0976	-0.631732	0.0246875	no
hsa-miR-365a-5p	2.04311	2.49056	-0.10698	1		0.4384	1.1783	-0.724405	0.0265684	no
hsa-miR-1306-5p	4.22592	3.5459	1.12929	1		2.48325	3.6746	-1.20469	0.0267741	no
hsa-miR-200b-3p	2.28719	2.22936	-0.423054	1		0.512784	1.4992	-0.845659	0.0284792	no
hsa-miR-126-3p	13.0749	14.23	-1.09031	1		9.63399	11.319	-1.85575	0.0351616	no
hsa-miR-15b-5p	9.53469	9.05493	0.636279	1		7.18054	8.11395	-0.996648	0.0351616	no
hsa-miR-331-3p	3.91842	3.73551	0.393264	1		2.40004	3.48705	-1.00288	0.0368697	no
hsa-miR-30d-3p	4.03569	3.92951	-0.0439899	1		1.25912	1.8592	-0.762744	0.0388194	no
hsa-miR-34a-5p	7.78438	7.88404	0.0407488	1		5.11855	7.0903	-1.59179	0.0451162	no
hsa-miR-374a-5p	7.79068	8.25262	-0.128035	1		4.077	5.37518	-1.21725	0.0477449	no
hsa-miR-652-3p	6.29242	5.93215	0.307205	1		2.95135	3.93468	-0.998845	0.0481398	no
hsa-miR-152-3p	10.9501	11.2372	-0.277757	1		6.90054	8.38405	-1.53375	0.0483319	no
hsa-miR-454-3p	5.75764	4.84088	0.762852	1		2.16556	3.4664	-1.04296	0.0489646	no
hsa-miR-1226-3p	2.11073	1.76819	0.598944	1		0.456	1.2671	-0.759151	0.0500623	no
hsa-miR-20a-5p	10.6386	10.7677	-0.565846	1		6.63728	7.95109	-1.43444	0.0510637	no
hsa-miR-30b-3p	3.36128	3.73624	-0.375963	1		0.547137	1.261	-0.673838	0.0521981	no
hsa-miR-26b-3p	3.17849	2.54949	0.72538	1		3.00698	3.88079	-1.11409	0.0541257	no
hsa-miR-421	4.83562	4.98157	0.318531	1		0.955798	1.93115	-0.7793	0.0591652	no
hsa-miR-26b-5p	11.0537	10.3037	0.845725	1		7.78799	8.70617	-0.971711	0.0607477	no
hsa-miR-3615	3.1534	2.92926	0.609031	1		0.919783	1.9621	-0.921888	0.0723391	no
hsa-miR-501-5p	1.96301	1.76029	0.27769	1		1.50047	2.42765	-1.09722	0.098146	no
hsa-miR-942-5p	1.59737	1.76029	-0.441917	1		1.72331	2.74148	-0.975016	0.105821	no
hsa-miR-16-2-3p	5.81593	5.3187	0.0177476	1		2.43046	3.76235	-1.03332	0.135675	no
hsa-miR-193a-5p	7.49874	7.91738	0.599071	1		7.09678	8.83833	-1.26851	0.150179	no
hsa-miR-200c-3p	4.48953	4.35801	-0.395446	1		3.20115	4.09982	-1.03888	0.17343	no
hsa-let-7d-5p	11.9202	11.7984	0.0529094	1		6.87144	7.91662	-1.07579	0.204369	no
hsa-miR-628-5p	3.76985	3.39926	0.281495	1		1.97927	3.32945	-0.950702	0.221332	no
hsa-miR-106b-3p	9.82991	9.37988	0.461006	1		6.7691	7.45533	-0.84505	0.240267	no
hsa-miR-185-3p	3.66519	4.06626	-0.355646	1		0.908124	1.70341	-0.733807	0.24677	no
hsa-miR-1468-5p	2.57933	1.92052	1.11525	1		1.51682	2.74182	-1.22673	0.266774	no
hsa-miR-195-5p	9.2196	8.38292	1.10044	1		5.23515	4.42229	1.13306	0.30097	no
hsa-miR-99a-3p	2.36914	3.39491	-0.490422	1		1.42012	2.02283	-1.27865	0.301805	no
hsa-miR-301a-5p	4.77825	3.89103	0.792529	1		1.19119	2.43852	-1.14443	0.387983	no
hsa-miR-378a-3p	11.1637	10.7229	1.0052	1		7.10332	8.5722	-1.51398	0.443641	no
hsa-miR-16-5p	10.6582	10.3082	0.511041	1		7.91848	8.99164	-0.96049	0.467673	no
hsa-miR-29b-3p	4.86373	4.06418	0.979487	1		7.36043	8.60541	-1.25859	0.500675	no
hsa-miR-378a-5p	5.53385	5.04687	0.525472	1		4.86641	6.04342	-1.50611	0.540739	no
hsa-miR-301a-3p	1.46617	0.988467	0.794509	1		2.57588	3.43993	-1.18223	0.630851	no
hsa-miR-222-3p	10.0882	8.99689	0.678051	1		5.96966	7.04133	-1.28305	0.677699	no
hsa-let-7f-1-3p	2.40065	3.51045	-0.94036	1		1.05214	2.07462	-0.680827	0.682853	no
hsa-let-7i-3p	5.96426	5.60061	0.518941	1		4.49066	5.64077	-1.16139	0.800468	no
hsa-miR-221-3p	13.0295	13.3409	-0.324244	1		7.7889	9.59069	-1.30923	0.997046	no
hsa-miR-93-5p	11.1982	11.3461	-0.0404108	1		11.3124	12.1365	-1.02711	0.999642	no
hsa-let-7b-3p	5.96425	5.96996	0.463516	1		3.86839	4.88938	-0.788954	1	no
hsa-miR-101-3p	9.6217	8.94176	1.27818	1		12.6267	12.3089	0.185755	1	no
hsa-miR-105-5p	2.28719	6.04144	-2.25789	1		1.6277	2.30413	-1.49934	1	no
hsa-miR-10a-3p	6.99008	6.71403	0.436257	1		0.9429	1.36136	-0.66738	1	no
hsa-miR-10b-3p	6.51389	6.63088	-0.188527	1		3.68301	4.17534	-0.554074	1	no
hsa-miR-1180-3p	7.54659	6.39397	1.25686	1		3.39223	3.95248	-0.468257	1	no
hsa-miR-125b-2-3p	5.56896	6.38623	-0.150057	1		3.39857	4.01659	-0.848343	1	no
hsa-miR-1262	1.40482	0.871095	-0.108547	1		1.04386	1.81817	-0.547283	1	no
hsa-miR-1270	1.8003	1.56956	0.472538	1		1.3024	2.00306	-0.717282	1	no
hsa-miR-1271-5p	7.40224	7.14033	0.24905	1		2.32575	3.33544	-0.911394	1	no
hsa-miR-1287-5p	5.29199	3.905	1.02745	1		3.83667	3.96946	0.0934429	1	no
hsa-miR-129-5p	3.66589	3.03327	0.139325	1		1.2726	1.3315	-0.416938	1	no
hsa-miR-139-3p	3.13719	3.23602	1.50683	1		2.87858	3.27632	-0.296499	1	no
hsa-miR-139-5p	7.42825	7.82553	0.614567	1		5.0429	5.29877	-0.738574	1	no
hsa-miR-150-5p	7.36738	8.22426	-1.34013	1		5.09387	6.34534	-1.37473	1	no
hsa-miR-155-5p	10.3932	10.1062	-0.374705	1		7.76999	9.26957	-1.14149	1	no
hsa-miR-181a-2-3p	8.02179	7.57692	0.531563	1		7.93514	10.0709	-1.81128	1	no
hsa-miR-181c-3p	5.17331	3.79007	1.09537	1		4.62102	4.79654	-0.338137	1	no
hsa-miR-184	1.64345	1.38082	0.754019	1		0.7664	1.5263	-0.524933	1	no
hsa-miR-192-5p	7.62336	7.06202	0.170376	1		6.72272	7.95249	-0.926651	1	no
hsa-miR-193a-3p	2.30368	2.62604	-0.118667	1		2.62392	3.9028	-0.920397	1	no
hsa-miR-194-5p	7.18608	7.16564	-0.33717	1		5.81204	6.27319	-0.533821	1	no
hsa-miR-204-5p	6.61966	5.96086	0.303594	1		4.59776	4.02678	0.547045	1	no
hsa-miR-20b-5p	4.43005	5.15153	-1.0505	1		3.7897	4.04838	0.177965	1	no
hsa-miR-210-3p	7.97022	7.62871	0.289507	1		7.73735	9.19744	-2.02837	1	no
hsa-miR-212-3p	1.96839	3.03287	-0.249542	1		1.21567	2.17026	-0.796882	1	no
hsa-miR-215-5p	1.64145	1.59716	0.514894	1		1.49482	1.71148	-0.199365	1	no
hsa-miR-224-3p	4.03126	3.58611	0.164528	1		1.35914	0.6508	0.456454	1	no
hsa-miR-224-5p	12.1603	11.8792	-0.272114	1		5.42077	5.64066	0.39693	1	no
hsa-miR-23b-3p	11.6093	11.0561	0.315123	1		10.1168	9.97127	0.334186	1	no
hsa-miR-26a-5p	16.1578	15.5499	0.632234	1		9.73509	10.1789	-0.911881	1	no
hsa-miR-296-3p	3.34311	3.94235	0.146731	1		0.3173	1.32443	-0.742223	1	no
hsa-miR-296-5p	4.75022	4.9791	0.268303	1		0.90951	2.05581	-0.827218	1	no
hsa-miR-31-3p	1.15835	2.92635	-1.80065	1		0.740831	1.74582	-1.56207	1	no
hsa-miR-31-5p	6.24837	7.06801	-1.65244	1		0.602561	2.86489	-1.40401	1	no
hsa-miR-3200-3p	1.34473	1.13955	0.550786	1		0.833999	1.4992	-0.760102	1	no
hsa-miR-330-3p	5.07123	4.94849	0.00283591	1		0.6089	1.01528	-0.498985	1	no
hsa-miR-331-5p	3.84235	3.2978	0.75482	1		1.10612	1.33152	-0.333646	1	no
hsa-miR-335-3p	6.73186	5.50755	0.410457	1		3.98427	6.17546	-2.07769	1	no
hsa-miR-335-5p	3.92266	3.96777	0.400214	1		1.21973	3.05444	-1.50668	1	no
hsa-miR-338-5p	3.20274	4.25232	-0.633618	1		0.701403	1.261	-0.446801	1	no
hsa-miR-339-3p	7.10171	7.22395	0.0169864	1		2.00185	2.43856	-0.650073	1	no
hsa-miR-34b-3p	2.2789	1.13084	1.48627	1		1.70008	1.62991	-0.0423745	1	no
hsa-miR-34c-3p	4.59816	3.4267	0.998697	1		3.34018	3.10148	0.384024	1	no
hsa-miR-34c-5p	10.0712	8.39323	1.28928	1		3.56697	3.62853	-0.223352	1	no
hsa-miR-363-3p	7.30829	7.14912	-0.425162	1		2.45723	2.34717	0.239148	1	no
hsa-miR-425-3p	3.793	3.92394	-0.155523	1		2.03648	2.61519	-0.539811	1	no
hsa-miR-452-5p	7.29132	7.14328	-0.0896985	1		5.67914	5.84714	0.396607	1	no
hsa-miR-4661-5p	1.76838	1.55212	-0.179208	1		1.51639	1.71368	-0.410697	1	no
hsa-miR-4746-5p	2.98379	2.30343	1.06239	1		1.84389	2.2076	-0.356394	1	no
hsa-miR-497-5p	8.86166	7.90786	0.662694	1		4.37184	4.10367	0.431009	1	no
hsa-miR-505-5p	2.15299	1.58001	0.948007	1		2.28743	3.43012	-0.837659	1	no
hsa-miR-508-3p	1.64482	1.58747	0.215914	1		1.64758	2.21842	-1.40817	1	no
hsa-miR-514a-3p	2.33869	2.07325	-0.339495	1		0.830237	1.71376	-1.25428	1	no
hsa-miR-550a-5p	1.52837	1.58001	0.0256855	1		1.46453	1.53342	-0.081505	1	no
hsa-miR-592	2.0706	2.19953	0.641831	1		0.334	1.1783	-0.24636	1	no
hsa-miR-598-3p	3.57295	4.74778	-0.443416	1		2.65302	4.17407	-1.33977	1	no
hsa-miR-624-5p	2.50639	1.96812	0.555732	1		0.5806	1.0976	-0.320591	1	no
hsa-miR-628-3p	1.48754	1.05249	0.723284	1		0.948235	1.32652	-0.455013	1	no
hsa-miR-651-5p	4.9985	5.20222	-0.0649139	1		0.787878	1.1223	-0.522117	1	no
hsa-miR-659-5p	1.97249	1.4104	0.946198	1		0.808382	1.14917	-0.227036	1	no
hsa-miR-664a-3p	6.37979	6.12487	0.44206	1		3.75964	4.70178	-0.711453	1	no
hsa-miR-664a-5p	4.35978	4.12455	-0.109374	1		1.22138	1.70331	-0.254079	1	no
hsa-miR-664b-3p	2.66286	2.32493	0.406549	1		1.25102	1.86956	-0.465266	1	no
hsa-miR-767-5p	2.22111	6.31344	-2.4363	1		0.723672	2.02269	-1.82902	1	no
hsa-miR-7706	4.29242	3.55349	1.43857	1		0.802066	1.52393	-0.672243	1	no
hsa-miR-877-5p	1.7176	1.75541	0.205991	1		0.552809	1.20971	-0.604916	1	no
hsa-miR-891a-5p	1.1745	1.77262	1.41899	1		1.51361	2.0032	-0.39728	1	no
hsa-miR-9-5p	9.68018	8.56842	1.48178	1		8.22348	7.93247	-0.176001	1	no
hsa-miR-92b-3p	9.02126	8.5489	0.953413	1		6.41425	6.34915	-0.208509	1	no

## Sheet: TS4C miRComb
Supplementary Table S4C: Significant pre-miRNA-mRNA associations (Pearson's correlation adjusted p-value < 0.01) in both cohorts from miRComb analysis.
Columns description: ID: identifiers of the interactions; miRNA: pre-miRNA symbols; mRNA: gene official gene symbol; miRecords and miRTarBase are put to 1 if the interaction has been described in the database, 0 otherwise;
sum db indicates how many times the interaction has been described; logFC: hLMS/oLMS log Fold Changes returned by limma for mRNA and miRNA; correlation: Pearson's correlation between mRNA and miRNA expression profiles;
DIO3_DLK1 indicates if the miRNA is belonging to the miRNA cluster.
			Databases			ICGC			TCGA			average correlation	DIO3_DLK1
ID	miRNA	mRNA	miRecords	miRTarBase	sum db	logFC mRNA	logFC miRNA	correlation	logFC mRNA	logFC miRNA	correlation
hsa-mir-127:A2M	hsa-mir-127	A2M	0	0	0	1.89011	-3.91527	-0.550528	2.43404	-5.73486	-0.496756	-0.523642	yes
hsa-mir-127:A4GALT	hsa-mir-127	A4GALT	0	0	0	1.16994	-3.91527	-0.515892	1.53993	-5.73486	-0.503472	-0.509682	yes
hsa-mir-127:ABCB10	hsa-mir-127	ABCB10	0	0	0	1.1519	-3.91527	-0.513822	1.2738	-5.73486	-0.630488	-0.572155	yes
hsa-mir-127:ABI3BP	hsa-mir-127	ABI3BP	0	0	0	1.10052	-3.91527	-0.446213	1.52282	-5.73486	-0.395171	-0.420692	yes
hsa-mir-127:ACOT1	hsa-mir-127	ACOT1	0	0	0	1.02697	-3.91527	-0.453825	1.47032	-5.73486	-0.459154	-0.45649	yes
hsa-mir-127:ACTG2	hsa-mir-127	ACTG2	0	0	0	6.08172	-3.91527	-0.604519	6.28231	-5.73486	-0.63557	-0.620044	yes
hsa-mir-127:ACTN1	hsa-mir-127	ACTN1	0	0	0	1.65095	-3.91527	-0.549658	1.7869	-5.73486	-0.55266	-0.551159	yes
hsa-mir-127:ADAM22	hsa-mir-127	ADAM22	0	0	0	2.90567	-3.91527	-0.72162	4.98611	-5.73486	-0.65486	-0.68824	yes
hsa-mir-127:ADAMTS1	hsa-mir-127	ADAMTS1	0	0	0	1.7897	-3.91527	-0.561673	1.79963	-5.73486	-0.431941	-0.496807	yes
hsa-mir-127:ADCY5	hsa-mir-127	ADCY5	0	0	0	3.42003	-3.91527	-0.635742	6.42722	-5.73486	-0.601012	-0.618377	yes
hsa-mir-127:ADCY9	hsa-mir-127	ADCY9	0	0	0	1.13699	-3.91527	-0.469858	1.62548	-5.73486	-0.569053	-0.519455	yes
hsa-mir-127:ADH6	hsa-mir-127	ADH6	0	0	0	1.14551	-3.91527	-0.577448	1.68322	-5.73486	-0.50269	-0.540069	yes
hsa-mir-127:ADHFE1	hsa-mir-127	ADHFE1	0	0	0	2.24844	-3.91527	-0.642125	2.97818	-5.73486	-0.596496	-0.619311	yes
hsa-mir-127:ADRB2	hsa-mir-127	ADRB2	0	0	0	2.22793	-3.91527	-0.623948	2.72037	-5.73486	-0.621298	-0.622623	yes
hsa-mir-127:AKAP1	hsa-mir-127	AKAP1	0	0	0	2.61448	-3.91527	-0.624003	3.1421	-5.73486	-0.697718	-0.66086	yes
hsa-mir-127:AKAP12	hsa-mir-127	AKAP12	0	0	0	1.19915	-3.91527	-0.441641	1.94037	-5.73486	-0.376107	-0.408874	yes
hsa-mir-127:AKAP5	hsa-mir-127	AKAP5	0	0	0	1.21945	-3.91527	-0.541944	2.12179	-5.73486	-0.396605	-0.469275	yes
hsa-mir-127:AKAP6	hsa-mir-127	AKAP6	0	0	0	3.02541	-3.91527	-0.65377	3.50761	-5.73486	-0.616795	-0.635283	yes
hsa-mir-127:AKT3	hsa-mir-127	AKT3	0	0	0	1.09271	-3.91527	-0.478883	1.77601	-5.73486	-0.502932	-0.490907	yes
hsa-mir-127:ALDH1B1	hsa-mir-127	ALDH1B1	0	0	0	3.50893	-3.91527	-0.591947	2.92292	-5.73486	-0.666304	-0.629126	yes
hsa-mir-127:ALDH3A2	hsa-mir-127	ALDH3A2	0	0	0	1.44111	-3.91527	-0.525397	1.9018	-5.73486	-0.576534	-0.550966	yes
hsa-mir-127:ALPK3	hsa-mir-127	ALPK3	0	0	0	1.54127	-3.91527	-0.484967	1.88418	-5.73486	-0.497378	-0.491173	yes
hsa-mir-127:ALS2CL	hsa-mir-127	ALS2CL	0	0	0	1.15449	-3.91527	-0.432865	1.68446	-5.73486	-0.554318	-0.493592	yes
hsa-mir-127:AMY2B	hsa-mir-127	AMY2B	0	0	0	1.24603	-3.91527	-0.437952	2.03636	-5.73486	-0.557404	-0.497678	yes
hsa-mir-127:ANG	hsa-mir-127	ANG	0	0	0	1.83844	-3.91527	-0.584372	1.88253	-5.73486	-0.583329	-0.583851	yes
hsa-mir-127:ANKDD1A	hsa-mir-127	ANKDD1A	0	0	0	1.0236	-3.91527	-0.480618	1.57544	-5.73486	-0.560993	-0.520805	yes
hsa-mir-127:ANKS1B	hsa-mir-127	ANKS1B	0	0	0	1.78846	-3.91527	-0.440511	3.22933	-5.73486	-0.661129	-0.55082	yes
hsa-mir-127:AOC3	hsa-mir-127	AOC3	0	0	0	3.79461	-3.91527	-0.619135	4.9919	-5.73486	-0.701245	-0.66019	yes
hsa-mir-127:AR	hsa-mir-127	AR	0	0	0	2.11235	-3.91527	-0.4992	3.44237	-5.73486	-0.613468	-0.556334	yes
hsa-mir-127:ARHGAP6	hsa-mir-127	ARHGAP6	0	0	0	1.22331	-3.91527	-0.505586	1.61651	-5.73486	-0.516468	-0.511027	yes
hsa-mir-127:ARHGEF10L	hsa-mir-127	ARHGEF10L	0	0	0	1.23755	-3.91527	-0.486428	1.71862	-5.73486	-0.613289	-0.549859	yes
hsa-mir-127:ARHGEF37	hsa-mir-127	ARHGEF37	0	0	0	1.90424	-3.91527	-0.537976	3.27552	-5.73486	-0.552708	-0.545342	yes
hsa-mir-127:ARMC3	hsa-mir-127	ARMC3	0	0	0	1.27883	-3.91527	-0.446029	1.1626	-5.73486	-0.38089	-0.41346	yes
hsa-mir-127:ARTN	hsa-mir-127	ARTN	0	0	0	1.12346	-3.91527	-0.493638	2.75797	-5.73486	-0.612	-0.552819	yes
hsa-mir-127:ASB2	hsa-mir-127	ASB2	0	0	0	5.11119	-3.91527	-0.612601	6.38015	-5.73486	-0.695457	-0.654029	yes
hsa-mir-127:ASF1B	hsa-mir-127	ASF1B	0	0	0	1.10192	-3.91527	-0.54342	1.43032	-5.73486	-0.454289	-0.498854	yes
hsa-mir-127:ATAD2	hsa-mir-127	ATAD2	0	0	0	1.0143	-3.91527	-0.525443	1.59911	-5.73486	-0.54138	-0.533412	yes
hsa-mir-127:ATP2B4	hsa-mir-127	ATP2B4	0	0	0	1.57073	-3.91527	-0.529905	2.09651	-5.73486	-0.536348	-0.533126	yes
hsa-mir-127:B3GALNT2	hsa-mir-127	B3GALNT2	0	0	0	1.41935	-3.91527	-0.525324	1.30803	-5.73486	-0.599424	-0.562374	yes
hsa-mir-127:BARD1	hsa-mir-127	BARD1	0	0	0	1.61718	-3.91527	-0.689078	2.54886	-5.73486	-0.477929	-0.583504	yes
hsa-mir-127:BCHE	hsa-mir-127	BCHE	0	0	0	4.02857	-3.91527	-0.608396	4.18428	-5.73486	-0.498062	-0.553229	yes
hsa-mir-127:BRIP1	hsa-mir-127	BRIP1	0	0	0	1.1106	-3.91527	-0.566434	2.10854	-5.73486	-0.537472	-0.551953	yes
hsa-mir-127:BTC	hsa-mir-127	BTC	0	0	0	2.06919	-3.91527	-0.582623	4.96552	-5.73486	-0.727766	-0.655194	yes
hsa-mir-127:BVES	hsa-mir-127	BVES	0	0	0	1.17849	-3.91527	-0.494434	1.5513	-5.73486	-0.604749	-0.549592	yes
hsa-mir-127:C12orf54	hsa-mir-127	C12orf54	0	0	0	2.29588	-3.91527	-0.485248	3.78809	-5.73486	-0.467707	-0.476477	yes
hsa-mir-127:C14orf28	hsa-mir-127	C14orf28	0	0	0	1.39657	-3.91527	-0.448645	1.09527	-5.73486	-0.455639	-0.452142	yes
hsa-mir-127:C15orf41	hsa-mir-127	C15orf41	0	0	0	1.26887	-3.91527	-0.588165	2.08016	-5.73486	-0.671147	-0.629656	yes
hsa-mir-127:C15orf52	hsa-mir-127	C15orf52	0	0	0	2.27081	-3.91527	-0.485965	3.82044	-5.73486	-0.675942	-0.580954	yes
hsa-mir-127:C1QL1	hsa-mir-127	C1QL1	0	0	0	2.33644	-3.91527	-0.48623	3.09658	-5.73486	-0.488752	-0.487491	yes
hsa-mir-127:C3orf70	hsa-mir-127	C3orf70	0	0	0	2.95434	-3.91527	-0.567231	3.98407	-5.73486	-0.644242	-0.605736	yes
hsa-mir-127:C8orf46	hsa-mir-127	C8orf46	0	0	0	1.91886	-3.91527	-0.534483	3.20543	-5.73486	-0.687756	-0.61112	yes
hsa-mir-127:CAMK1	hsa-mir-127	CAMK1	0	0	0	1.07126	-3.91527	-0.497791	1.5535	-5.73486	-0.67134	-0.584566	yes
hsa-mir-127:CAND2	hsa-mir-127	CAND2	0	0	0	1.44731	-3.91527	-0.613109	2.34625	-5.73486	-0.381629	-0.497369	yes
hsa-mir-127:CAP2	hsa-mir-127	CAP2	0	0	0	2.80385	-3.91527	-0.595991	2.1386	-5.73486	-0.475704	-0.535848	yes
hsa-mir-127:CASP12	hsa-mir-127	CASP12	0	0	0	1.11894	-3.91527	-0.526426	3.26342	-5.73486	-0.673088	-0.599757	yes
hsa-mir-127:CASQ2	hsa-mir-127	CASQ2	0	0	0	5.63392	-3.91527	-0.618483	6.68191	-5.73486	-0.584822	-0.601652	yes
hsa-mir-127:CASZ1	hsa-mir-127	CASZ1	0	0	0	1.62955	-3.91527	-0.550818	3.14537	-5.73486	-0.56192	-0.556369	yes
hsa-mir-127:CBX7	hsa-mir-127	CBX7	0	0	0	1.6508	-3.91527	-0.482172	2.9876	-5.73486	-0.676952	-0.579562	yes
hsa-mir-127:CCDC107	hsa-mir-127	CCDC107	0	0	0	1.62045	-3.91527	-0.540749	1.42138	-5.73486	-0.673634	-0.607192	yes
hsa-mir-127:CCDC146	hsa-mir-127	CCDC146	0	0	0	1.46007	-3.91527	-0.522026	2.43823	-5.73486	-0.591615	-0.55682	yes
hsa-mir-127:CCDC24	hsa-mir-127	CCDC24	0	0	0	1.01986	-3.91527	-0.56204	1.6206	-5.73486	-0.540835	-0.551437	yes
hsa-mir-127:CCDC51	hsa-mir-127	CCDC51	0	0	0	1.27894	-3.91527	-0.492029	1.48876	-5.73486	-0.493715	-0.492872	yes
hsa-mir-127:CCDC81	hsa-mir-127	CCDC81	0	0	0	1.7181	-3.91527	-0.455986	4.20384	-5.73486	-0.707291	-0.581639	yes
hsa-mir-127:CCNE2	hsa-mir-127	CCNE2	0	0	0	1.24341	-3.91527	-0.524593	2.2008	-5.73486	-0.537805	-0.531199	yes
hsa-mir-127:CCR10	hsa-mir-127	CCR10	0	0	0	1.09994	-3.91527	-0.491532	1.85717	-5.73486	-0.38048	-0.436006	yes
hsa-mir-127:CD9	hsa-mir-127	CD9	0	0	0	1.86207	-3.91527	-0.483552	2.13873	-5.73486	-0.663782	-0.573667	yes
hsa-mir-127:CDC42EP3	hsa-mir-127	CDC42EP3	0	0	0	1.85477	-3.91527	-0.431646	2.06231	-5.73486	-0.54863	-0.490138	yes
hsa-mir-127:CDC42EP4	hsa-mir-127	CDC42EP4	0	0	0	1.63331	-3.91527	-0.501579	1.54052	-5.73486	-0.519344	-0.510462	yes
hsa-mir-127:CDCA7L	hsa-mir-127	CDCA7L	0	0	0	1.44829	-3.91527	-0.482944	1.26503	-5.73486	-0.371859	-0.427401	yes
hsa-mir-127:CDH3	hsa-mir-127	CDH3	0	0	0	3.21082	-3.91527	-0.537319	5.99966	-5.73486	-0.678068	-0.607693	yes
hsa-mir-127:CDK18	hsa-mir-127	CDK18	0	0	0	1.56987	-3.91527	-0.510843	2.1765	-5.73486	-0.460297	-0.48557	yes
hsa-mir-127:CDKL1	hsa-mir-127	CDKL1	0	0	0	1.46368	-3.91527	-0.579976	3.19245	-5.73486	-0.61081	-0.595393	yes
hsa-mir-127:CDKN1B	hsa-mir-127	CDKN1B	0	0	0	1.12587	-3.91527	-0.625281	1.31195	-5.73486	-0.449674	-0.537477	yes
hsa-mir-127:CDKN2C	hsa-mir-127	CDKN2C	0	0	0	1.23762	-3.91527	-0.662987	1.41605	-5.73486	-0.567743	-0.615365	yes
hsa-mir-127:CELSR2	hsa-mir-127	CELSR2	0	0	0	1.60769	-3.91527	-0.592258	2.50299	-5.73486	-0.510248	-0.551253	yes
hsa-mir-127:CFL2	hsa-mir-127	CFL2	0	0	0	2.76315	-3.91527	-0.648075	2.03675	-5.73486	-0.616162	-0.632118	yes
hsa-mir-127:CHI3L2	hsa-mir-127	CHI3L2	0	0	0	1.88277	-3.91527	-0.429755	4.10771	-5.73486	-0.652722	-0.541239	yes
hsa-mir-127:CHRDL2	hsa-mir-127	CHRDL2	0	0	0	3.46795	-3.91527	-0.495003	7.79211	-5.73486	-0.627269	-0.561136	yes
hsa-mir-127:CITED4	hsa-mir-127	CITED4	0	0	0	1.06187	-3.91527	-0.502265	1.26697	-5.73486	-0.347902	-0.425083	yes
hsa-mir-127:CKB	hsa-mir-127	CKB	0	0	0	3.74296	-3.91527	-0.660861	3.34815	-5.73486	-0.591621	-0.626241	yes
hsa-mir-127:CKMT2	hsa-mir-127	CKMT2	0	0	0	1.71887	-3.91527	-0.525889	5.04321	-5.73486	-0.649102	-0.587495	yes
hsa-mir-127:CLSTN2	hsa-mir-127	CLSTN2	0	0	0	1.41005	-3.91527	-0.432225	2.89228	-5.73486	-0.393498	-0.412861	yes
hsa-mir-127:CLU	hsa-mir-127	CLU	0	0	0	3.55382	-3.91527	-0.516455	4.5752	-5.73486	-0.644631	-0.580543	yes
hsa-mir-127:CNN1	hsa-mir-127	CNN1	0	0	0	6.31906	-3.91527	-0.596043	7.26636	-5.73486	-0.730085	-0.663064	yes
hsa-mir-127:CNR1	hsa-mir-127	CNR1	0	0	0	2.3465	-3.91527	-0.538253	4.5959	-5.73486	-0.46903	-0.503641	yes
hsa-mir-127:COL4A2	hsa-mir-127	COL4A2	0	0	0	1.17849	-3.91527	-0.540758	1.67571	-5.73486	-0.424902	-0.48283	yes
hsa-mir-127:COL4A5	hsa-mir-127	COL4A5	0	0	0	3.13468	-3.91527	-0.459068	5.03409	-5.73486	-0.58062	-0.519844	yes
hsa-mir-127:COL4A6	hsa-mir-127	COL4A6	0	0	0	2.84731	-3.91527	-0.421809	6.76493	-5.73486	-0.709677	-0.565743	yes
hsa-mir-127:CRTAC1	hsa-mir-127	CRTAC1	0	0	0	1.68092	-3.91527	-0.458255	3.56524	-5.73486	-0.367735	-0.412995	yes
hsa-mir-127:CRYAB	hsa-mir-127	CRYAB	0	0	0	3.37894	-3.91527	-0.464493	3.81	-5.73486	-0.608399	-0.536446	yes
hsa-mir-127:CSRP1	hsa-mir-127	CSRP1	0	0	0	3.95837	-3.91527	-0.644285	4.38227	-5.73486	-0.7957	-0.719992	yes
hsa-mir-127:CTF1	hsa-mir-127	CTF1	0	0	0	1.12617	-3.91527	-0.536477	2.26307	-5.73486	-0.586082	-0.561279	yes
hsa-mir-127:CX3CL1	hsa-mir-127	CX3CL1	0	0	0	2.85414	-3.91527	-0.660343	3.24604	-5.73486	-0.594704	-0.627524	yes
hsa-mir-127:CYFIP2	hsa-mir-127	CYFIP2	0	0	0	2.35929	-3.91527	-0.57536	4.07398	-5.73486	-0.611749	-0.593554	yes
hsa-mir-127:DAAM1	hsa-mir-127	DAAM1	0	0	0	1.37998	-3.91527	-0.507726	1.52472	-5.73486	-0.389982	-0.448854	yes
hsa-mir-127:DACT3	hsa-mir-127	DACT3	0	0	0	2.81637	-3.91527	-0.569185	3.50169	-5.73486	-0.533597	-0.551391	yes
hsa-mir-127:DBNDD2	hsa-mir-127	DBNDD2	0	0	0	2.87141	-3.91527	-0.645174	3.32301	-5.73486	-0.747681	-0.696428	yes
hsa-mir-127:DCAF12L1	hsa-mir-127	DCAF12L1	0	0	0	2.02121	-3.91527	-0.48412	5.32693	-5.73486	-0.540735	-0.512428	yes
hsa-mir-127:DCST2	hsa-mir-127	DCST2	0	0	0	1.25095	-3.91527	-0.468604	3.32899	-5.73486	-0.673165	-0.570885	yes
hsa-mir-127:DDO	hsa-mir-127	DDO	0	0	0	1.17241	-3.91527	-0.481648	1.76593	-5.73486	-0.48189	-0.481769	yes
hsa-mir-127:DDR1	hsa-mir-127	DDR1	0	0	0	1.29773	-3.91527	-0.515036	1.40535	-5.73486	-0.505513	-0.510274	yes
hsa-mir-127:DES	hsa-mir-127	DES	0	0	0	6.10569	-3.91527	-0.521534	5.02957	-5.73486	-0.570804	-0.546169	yes
hsa-mir-127:DGKG	hsa-mir-127	DGKG	0	0	0	2.93347	-3.91527	-0.623613	4.7732	-5.73486	-0.765818	-0.694715	yes
hsa-mir-127:DLG3	hsa-mir-127	DLG3	0	0	0	1.28271	-3.91527	-0.570316	1.61007	-5.73486	-0.720059	-0.645187	yes
hsa-mir-127:DMD	hsa-mir-127	DMD	0	0	0	3.57481	-3.91527	-0.50759	3.32169	-5.73486	-0.615669	-0.56163	yes
hsa-mir-127:DNAH11	hsa-mir-127	DNAH11	0	0	0	2.89638	-3.91527	-0.508173	5.23861	-5.73486	-0.708758	-0.608466	yes
hsa-mir-127:DNAJB5	hsa-mir-127	DNAJB5	0	0	0	2.04633	-3.91527	-0.595564	2.06652	-5.73486	-0.566522	-0.581043	yes
hsa-mir-127:DOCK3	hsa-mir-127	DOCK3	0	0	0	2.37575	-3.91527	-0.609072	5.2369	-5.73486	-0.772912	-0.690992	yes
hsa-mir-127:DSTN	hsa-mir-127	DSTN	0	0	0	2.23571	-3.91527	-0.618956	2.35155	-5.73486	-0.696262	-0.657609	yes
hsa-mir-127:DTNA	hsa-mir-127	DTNA	0	0	0	2.86556	-3.91527	-0.615445	3.90025	-5.73486	-0.751839	-0.683642	yes
hsa-mir-127:DUSP19	hsa-mir-127	DUSP19	0	1	1	1.30293	-3.91527	-0.474396	2.10784	-5.73486	-0.539476	-0.506936	yes
hsa-mir-127:DUSP3	hsa-mir-127	DUSP3	0	0	0	1.15271	-3.91527	-0.544401	1.34973	-5.73486	-0.641727	-0.593064	yes
hsa-mir-127:EHBP1L1	hsa-mir-127	EHBP1L1	0	0	0	1.38964	-3.91527	-0.486138	1.31297	-5.73486	-0.617279	-0.551709	yes
hsa-mir-127:EMILIN3	hsa-mir-127	EMILIN3	0	0	0	1.14476	-3.91527	-0.444698	3.3643	-5.73486	-0.386677	-0.415687	yes
hsa-mir-127:EMP2	hsa-mir-127	EMP2	0	0	0	1.13017	-3.91527	-0.502103	1.50151	-5.73486	-0.495749	-0.498926	yes
hsa-mir-127:ENAM	hsa-mir-127	ENAM	0	0	0	1.06542	-3.91527	-0.500401	4.93885	-5.73486	-0.71821	-0.609306	yes
hsa-mir-127:EPHB6	hsa-mir-127	EPHB6	0	0	0	1.20043	-3.91527	-0.454361	2.94138	-5.73486	-0.471278	-0.46282	yes
hsa-mir-127:EPHX2	hsa-mir-127	EPHX2	0	0	0	2.01584	-3.91527	-0.43927	3.42457	-5.73486	-0.543901	-0.491586	yes
hsa-mir-127:EPM2A	hsa-mir-127	EPM2A	0	0	0	1.4599	-3.91527	-0.53303	1.61728	-5.73486	-0.5055	-0.519265	yes
hsa-mir-127:EPN2	hsa-mir-127	EPN2	0	0	0	1.22892	-3.91527	-0.435038	1.57834	-5.73486	-0.444909	-0.439974	yes
hsa-mir-127:ESYT2	hsa-mir-127	ESYT2	0	0	0	1.10105	-3.91527	-0.425872	1.06343	-5.73486	-0.348431	-0.387151	yes
hsa-mir-127:ETS2	hsa-mir-127	ETS2	0	0	0	1.01104	-3.91527	-0.548831	1.28153	-5.73486	-0.542336	-0.545584	yes
hsa-mir-127:EXOC6	hsa-mir-127	EXOC6	0	0	0	1.00609	-3.91527	-0.558636	1.16135	-5.73486	-0.516	-0.537318	yes
hsa-mir-127:FABP3	hsa-mir-127	FABP3	0	0	0	1.42703	-3.91527	-0.520684	2.09936	-5.73486	-0.447067	-0.483876	yes
hsa-mir-127:FAM111B	hsa-mir-127	FAM111B	0	0	0	1.56099	-3.91527	-0.69522	2.14936	-5.73486	-0.600241	-0.64773	yes
hsa-mir-127:FAM129A	hsa-mir-127	FAM129A	0	0	0	2.75693	-3.91527	-0.70147	3.76197	-5.73486	-0.707114	-0.704292	yes
hsa-mir-127:FAM131A	hsa-mir-127	FAM131A	0	0	0	1.32405	-3.91527	-0.519415	1.46362	-5.73486	-0.621664	-0.570539	yes
hsa-mir-127:FAM184A	hsa-mir-127	FAM184A	0	0	0	2.76162	-3.91527	-0.570589	5.30632	-5.73486	-0.700813	-0.635701	yes
hsa-mir-127:FAM46B	hsa-mir-127	FAM46B	0	0	0	2.3901	-3.91527	-0.524095	3.86896	-5.73486	-0.574764	-0.54943	yes
hsa-mir-127:FAM46C	hsa-mir-127	FAM46C	0	0	0	1.62117	-3.91527	-0.552531	2.63672	-5.73486	-0.450567	-0.501549	yes
hsa-mir-127:FANCE	hsa-mir-127	FANCE	0	0	0	1.02196	-3.91527	-0.601557	1.54449	-5.73486	-0.623313	-0.612435	yes
hsa-mir-127:FAT3	hsa-mir-127	FAT3	0	0	0	2.03938	-3.91527	-0.46828	3.31459	-5.73486	-0.512904	-0.490592	yes
hsa-mir-127:FBXL22	hsa-mir-127	FBXL22	0	0	0	3.67056	-3.91527	-0.592357	5.41805	-5.73486	-0.678751	-0.635554	yes
hsa-mir-127:FBXO32	hsa-mir-127	FBXO32	0	0	0	2.78527	-3.91527	-0.592057	2.75522	-5.73486	-0.621254	-0.606656	yes
hsa-mir-127:FCRLA	hsa-mir-127	FCRLA	0	0	0	1.15578	-3.91527	-0.54308	3.26453	-5.73486	-0.492401	-0.517741	yes
hsa-mir-127:FEM1B	hsa-mir-127	FEM1B	0	0	0	1.0278	-3.91527	-0.466982	1.65142	-5.73486	-0.557755	-0.512368	yes
hsa-mir-127:FERMT2	hsa-mir-127	FERMT2	0	0	0	1.53198	-3.91527	-0.602846	1.41549	-5.73486	-0.420233	-0.51154	yes
hsa-mir-127:FGF13	hsa-mir-127	FGF13	0	0	0	2.3321	-3.91527	-0.469643	4.43938	-5.73486	-0.655659	-0.562651	yes
hsa-mir-127:FGF7	hsa-mir-127	FGF7	0	0	0	2.20089	-3.91527	-0.522545	4.3507	-5.73486	-0.51745	-0.519998	yes
hsa-mir-127:FHL1	hsa-mir-127	FHL1	0	0	0	2.79018	-3.91527	-0.531463	3.06593	-5.73486	-0.469613	-0.500538	yes
hsa-mir-127:FIGN	hsa-mir-127	FIGN	0	0	0	1.02909	-3.91527	-0.482802	1.68705	-5.73486	-0.480977	-0.48189	yes
hsa-mir-127:FILIP1	hsa-mir-127	FILIP1	0	0	0	1.87945	-3.91527	-0.484456	3.16656	-5.73486	-0.622426	-0.553441	yes
hsa-mir-127:FLNA	hsa-mir-127	FLNA	0	0	0	1.77012	-3.91527	-0.532794	2.59069	-5.73486	-0.750342	-0.641568	yes
hsa-mir-127:FMO5	hsa-mir-127	FMO5	0	0	0	1.3293	-3.91527	-0.422805	2.989	-5.73486	-0.69091	-0.556858	yes
hsa-mir-127:FNBP1	hsa-mir-127	FNBP1	0	0	0	1.35777	-3.91527	-0.467852	1.76871	-5.73486	-0.66034	-0.564096	yes
hsa-mir-127:FOXN3	hsa-mir-127	FOXN3	0	0	0	1.03316	-3.91527	-0.436604	1.41269	-5.73486	-0.516197	-0.476401	yes
hsa-mir-127:FRY	hsa-mir-127	FRY	0	0	0	3.10632	-3.91527	-0.624984	3.73265	-5.73486	-0.56199	-0.593487	yes
hsa-mir-127:FXYD1	hsa-mir-127	FXYD1	0	0	0	3.57261	-3.91527	-0.562489	3.36165	-5.73486	-0.398593	-0.480541	yes
hsa-mir-127:FYCO1	hsa-mir-127	FYCO1	0	0	0	1.85567	-3.91527	-0.526332	2.27998	-5.73486	-0.500435	-0.513384	yes
hsa-mir-127:GADD45G	hsa-mir-127	GADD45G	0	0	0	1.50701	-3.91527	-0.484625	2.80499	-5.73486	-0.637627	-0.561126	yes
hsa-mir-127:GBP2	hsa-mir-127	GBP2	0	0	0	1.33897	-3.91527	-0.545518	1.62269	-5.73486	-0.548487	-0.547003	yes
hsa-mir-127:GCHFR	hsa-mir-127	GCHFR	0	0	0	1.31947	-3.91527	-0.513837	1.47698	-5.73486	-0.369819	-0.441828	yes
hsa-mir-127:GIPC3	hsa-mir-127	GIPC3	0	0	0	2.79751	-3.91527	-0.573824	3.72589	-5.73486	-0.64587	-0.609847	yes
hsa-mir-127:GKAP1	hsa-mir-127	GKAP1	0	0	0	1.75385	-3.91527	-0.629754	3.03784	-5.73486	-0.654747	-0.642251	yes
hsa-mir-127:GNA11	hsa-mir-127	GNA11	0	0	0	1.09078	-3.91527	-0.471557	1.68982	-5.73486	-0.480126	-0.475842	yes
hsa-mir-127:GNAO1	hsa-mir-127	GNAO1	0	0	0	2.68704	-3.91527	-0.597378	5.08347	-5.73486	-0.572973	-0.585176	yes
hsa-mir-127:GNAZ	hsa-mir-127	GNAZ	0	0	0	2.21117	-3.91527	-0.460286	3.39519	-5.73486	-0.625608	-0.542947	yes
hsa-mir-127:GPD1L	hsa-mir-127	GPD1L	0	0	0	1.66429	-3.91527	-0.621829	1.7473	-5.73486	-0.605053	-0.613441	yes
hsa-mir-127:GPR17	hsa-mir-127	GPR17	0	0	0	1.84378	-3.91527	-0.465885	3.21385	-5.73486	-0.549482	-0.507684	yes
hsa-mir-127:GPR21	hsa-mir-127	GPR21	0	0	0	1.59904	-3.91527	-0.558031	4.37703	-5.73486	-0.607589	-0.58281	yes
hsa-mir-127:GRIK5	hsa-mir-127	GRIK5	0	0	0	2.4388	-3.91527	-0.622098	6.21105	-5.73486	-0.759903	-0.691	yes
hsa-mir-127:GSN	hsa-mir-127	GSN	0	0	0	1.72732	-3.91527	-0.490313	2.09157	-5.73486	-0.676275	-0.583294	yes
hsa-mir-127:GYG1	hsa-mir-127	GYG1	0	0	0	1.11725	-3.91527	-0.611793	1.30808	-5.73486	-0.61231	-0.612052	yes
hsa-mir-127:HADH	hsa-mir-127	HADH	0	0	0	1.20719	-3.91527	-0.611794	1.43436	-5.73486	-0.620439	-0.616117	yes
hsa-mir-127:HEY2	hsa-mir-127	HEY2	0	0	0	1.77781	-3.91527	-0.469779	3.15361	-5.73486	-0.499945	-0.484862	yes
hsa-mir-127:HPD	hsa-mir-127	HPD	0	0	0	1.77678	-3.91527	-0.495129	5.51277	-5.73486	-0.672199	-0.583664	yes
hsa-mir-127:HRCT1	hsa-mir-127	HRCT1	0	0	0	1.59823	-3.91527	-0.491584	2.56685	-5.73486	-0.466196	-0.47889	yes
hsa-mir-127:HSPA2	hsa-mir-127	HSPA2	0	0	0	2.80833	-3.91527	-0.545554	2.91782	-5.73486	-0.38654	-0.466047	yes
hsa-mir-127:HSPA4L	hsa-mir-127	HSPA4L	0	0	0	1.93726	-3.91527	-0.660664	2.64427	-5.73486	-0.519398	-0.590031	yes
hsa-mir-127:HSPB2	hsa-mir-127	HSPB2	0	0	0	2.12144	-3.91527	-0.451418	2.49439	-5.73486	-0.56015	-0.505784	yes
hsa-mir-127:HSPB6	hsa-mir-127	HSPB6	0	0	0	1.90243	-3.91527	-0.484793	2.98093	-5.73486	-0.413868	-0.44933	yes
hsa-mir-127:HSPB8	hsa-mir-127	HSPB8	0	0	0	4.17121	-3.91527	-0.540126	3.89435	-5.73486	-0.615044	-0.577585	yes
hsa-mir-127:IFT81	hsa-mir-127	IFT81	0	0	0	1.0771	-3.91527	-0.562805	1.22293	-5.73486	-0.495235	-0.52902	yes
hsa-mir-127:IGFBPL1	hsa-mir-127	IGFBPL1	0	0	0	2.82994	-3.91527	-0.583668	3.83986	-5.73486	-0.502415	-0.543041	yes
hsa-mir-127:IGSF9B	hsa-mir-127	IGSF9B	0	0	0	3.18688	-3.91527	-0.628216	5.44172	-5.73486	-0.594419	-0.611318	yes
hsa-mir-127:IL17B	hsa-mir-127	IL17B	0	0	0	3.84892	-3.91527	-0.592332	5.70249	-5.73486	-0.581878	-0.587105	yes
hsa-mir-127:IL33	hsa-mir-127	IL33	0	0	0	2.9397	-3.91527	-0.44748	4.73026	-5.73486	-0.593628	-0.520554	yes
hsa-mir-127:IL6R	hsa-mir-127	IL6R	0	0	0	1.08266	-3.91527	-0.521932	2.30388	-5.73486	-0.548651	-0.535292	yes
hsa-mir-127:ILK	hsa-mir-127	ILK	0	0	0	1.67372	-3.91527	-0.526047	1.27899	-5.73486	-0.586166	-0.556107	yes
hsa-mir-127:INPP5J	hsa-mir-127	INPP5J	0	0	0	1.14193	-3.91527	-0.544212	3.84205	-5.73486	-0.688076	-0.616144	yes
hsa-mir-127:IRF6	hsa-mir-127	IRF6	0	0	0	1.87699	-3.91527	-0.49762	5.45863	-5.73486	-0.689429	-0.593524	yes
hsa-mir-127:ISOC1	hsa-mir-127	ISOC1	0	0	0	1.39378	-3.91527	-0.599064	1.70431	-5.73486	-0.43046	-0.514762	yes
hsa-mir-127:ITGA1	hsa-mir-127	ITGA1	0	0	0	1.43251	-3.91527	-0.550556	2.29954	-5.73486	-0.629218	-0.589887	yes
hsa-mir-127:ITGA3	hsa-mir-127	ITGA3	0	0	0	1.58749	-3.91527	-0.484052	1.16007	-5.73486	-0.410798	-0.447425	yes
hsa-mir-127:ITGA7	hsa-mir-127	ITGA7	0	0	0	3.72879	-3.91527	-0.616206	3.81952	-5.73486	-0.682366	-0.649286	yes
hsa-mir-127:ITGA8	hsa-mir-127	ITGA8	0	0	0	3.50095	-3.91527	-0.466476	4.98276	-5.73486	-0.613165	-0.539821	yes
hsa-mir-127:ITPR1	hsa-mir-127	ITPR1	0	0	0	2.47087	-3.91527	-0.594059	3.03312	-5.73486	-0.700897	-0.647478	yes
hsa-mir-127:JPH2	hsa-mir-127	JPH2	0	0	0	5.17164	-3.91527	-0.625125	5.3085	-5.73486	-0.735253	-0.680189	yes
hsa-mir-127:KALRN	hsa-mir-127	KALRN	0	0	0	1.44376	-3.91527	-0.524971	2.018	-5.73486	-0.446433	-0.485702	yes
hsa-mir-127:KANK1	hsa-mir-127	KANK1	0	0	0	2.32102	-3.91527	-0.476387	2.96729	-5.73486	-0.619732	-0.54806	yes
hsa-mir-127:KANK2	hsa-mir-127	KANK2	0	0	0	1.49202	-3.91527	-0.558912	2.4367	-5.73486	-0.58984	-0.574376	yes
hsa-mir-127:KBTBD12	hsa-mir-127	KBTBD12	0	0	0	1.10998	-3.91527	-0.501768	4.59271	-5.73486	-0.602791	-0.55228	yes
hsa-mir-127:KCND3	hsa-mir-127	KCND3	0	0	0	2.95262	-3.91527	-0.456636	4.6143	-5.73486	-0.639416	-0.548026	yes
hsa-mir-127:KCNE4	hsa-mir-127	KCNE4	0	0	0	1.45372	-3.91527	-0.454632	1.88091	-5.73486	-0.448927	-0.451779	yes
hsa-mir-127:KCNH2	hsa-mir-127	KCNH2	0	0	0	4.02049	-3.91527	-0.633043	6.66594	-5.73486	-0.693044	-0.663043	yes
hsa-mir-127:KCNMB1	hsa-mir-127	KCNMB1	0	0	0	4.72051	-3.91527	-0.658344	6.80636	-5.73486	-0.72059	-0.689467	yes
hsa-mir-127:KCNQ4	hsa-mir-127	KCNQ4	0	0	0	2.21958	-3.91527	-0.548449	4.70072	-5.73486	-0.756971	-0.65271	yes
hsa-mir-127:KIAA1755	hsa-mir-127	KIAA1755	0	0	0	1.56532	-3.91527	-0.494598	3.69972	-5.73486	-0.635439	-0.565018	yes
hsa-mir-127:KIAA2022	hsa-mir-127	KIAA2022	0	0	0	1.72042	-3.91527	-0.553961	4.85876	-5.73486	-0.59075	-0.572355	yes
hsa-mir-127:KLF15	hsa-mir-127	KLF15	0	0	0	2.17821	-3.91527	-0.51889	4.81293	-5.73486	-0.647101	-0.582995	yes
hsa-mir-127:KLF17	hsa-mir-127	KLF17	0	0	0	1.13216	-3.91527	-0.450816	3.99831	-5.73486	-0.635032	-0.542924	yes
hsa-mir-127:KLF8	hsa-mir-127	KLF8	0	0	0	1.30676	-3.91527	-0.58575	3.80649	-5.73486	-0.703136	-0.644443	yes
hsa-mir-127:KLHL13	hsa-mir-127	KLHL13	0	0	0	2.32715	-3.91527	-0.510209	3.86274	-5.73486	-0.551586	-0.530897	yes
hsa-mir-127:KLHL23	hsa-mir-127	KLHL23	0	0	0	2.89743	-3.91527	-0.691608	4.29607	-5.73486	-0.642156	-0.666882	yes
hsa-mir-127:KLHL30	hsa-mir-127	KLHL30	0	0	0	1.48798	-3.91527	-0.475062	3.063	-5.73486	-0.554129	-0.514596	yes
hsa-mir-127:LAMA3	hsa-mir-127	LAMA3	0	0	0	2.21228	-3.91527	-0.600922	5.10561	-5.73486	-0.766351	-0.683637	yes
hsa-mir-127:LAMA5	hsa-mir-127	LAMA5	0	0	0	2.05682	-3.91527	-0.513675	2.24412	-5.73486	-0.474679	-0.494177	yes
hsa-mir-127:LAMB2	hsa-mir-127	LAMB2	0	0	0	1.1393	-3.91527	-0.604569	1.23316	-5.73486	-0.370432	-0.487501	yes
hsa-mir-127:LBR	hsa-mir-127	LBR	0	0	0	1.46308	-3.91527	-0.623731	1.52637	-5.73486	-0.586038	-0.604885	yes
hsa-mir-127:LDB3	hsa-mir-127	LDB3	0	0	0	2.29062	-3.91527	-0.468768	3.71398	-5.73486	-0.501739	-0.485253	yes
hsa-mir-127:LDLR	hsa-mir-127	LDLR	0	0	0	1.3352	-3.91527	-0.544628	1.52144	-5.73486	-0.350817	-0.447723	yes
hsa-mir-127:LDOC1	hsa-mir-127	LDOC1	0	0	0	2.63526	-3.91527	-0.460815	5.02469	-5.73486	-0.700513	-0.580664	yes
hsa-mir-127:LGI4	hsa-mir-127	LGI4	0	0	0	1.90257	-3.91527	-0.432221	3.51166	-5.73486	-0.436979	-0.4346	yes
hsa-mir-127:LIMS2	hsa-mir-127	LIMS2	0	0	0	2.81582	-3.91527	-0.544095	3.26328	-5.73486	-0.603153	-0.573624	yes
hsa-mir-127:LMO1	hsa-mir-127	LMO1	0	0	0	3.43704	-3.91527	-0.438515	6.82507	-5.73486	-0.608369	-0.523442	yes
hsa-mir-127:LMOD1	hsa-mir-127	LMOD1	0	0	0	5.79894	-3.91527	-0.618997	6.93618	-5.73486	-0.739503	-0.67925	yes
hsa-mir-127:LOC81691	hsa-mir-127	LOC81691	0	0	0	1.02095	-3.91527	-0.550122	1.90228	-5.73486	-0.605035	-0.577579	yes
hsa-mir-127:LONRF2	hsa-mir-127	LONRF2	0	0	0	3.14858	-3.91527	-0.490234	6.6311	-5.73486	-0.585485	-0.537859	yes
hsa-mir-127:LPP	hsa-mir-127	LPP	0	0	0	2.5206	-3.91527	-0.578505	2.89016	-5.73486	-0.553732	-0.566118	yes
hsa-mir-127:LRRC8B	hsa-mir-127	LRRC8B	0	0	0	1.16975	-3.91527	-0.483199	1.64558	-5.73486	-0.403631	-0.443415	yes
hsa-mir-127:LSM11	hsa-mir-127	LSM11	0	0	0	1.17308	-3.91527	-0.427852	1.27388	-5.73486	-0.561068	-0.49446	yes
hsa-mir-127:LYNX1	hsa-mir-127	LYNX1	0	0	0	2.65296	-3.91527	-0.442279	3.54856	-5.73486	-0.647683	-0.544981	yes
hsa-mir-127:MACF1	hsa-mir-127	MACF1	0	0	0	1.40649	-3.91527	-0.476144	1.79964	-5.73486	-0.54427	-0.510207	yes
hsa-mir-127:MAGI1	hsa-mir-127	MAGI1	0	0	0	1.43797	-3.91527	-0.653076	2.11695	-5.73486	-0.418261	-0.535669	yes
hsa-mir-127:MANBAL	hsa-mir-127	MANBAL	0	0	0	1.14884	-3.91527	-0.58821	1.4049	-5.73486	-0.657601	-0.622905	yes
hsa-mir-127:MANSC1	hsa-mir-127	MANSC1	0	0	0	1.6646	-3.91527	-0.574644	2.5998	-5.73486	-0.544147	-0.559396	yes
hsa-mir-127:MAOA	hsa-mir-127	MAOA	0	0	0	2.18982	-3.91527	-0.530714	4.55552	-5.73486	-0.624913	-0.577813	yes
hsa-mir-127:MAOB	hsa-mir-127	MAOB	0	0	0	4.33842	-3.91527	-0.602435	6.89565	-5.73486	-0.663925	-0.63318	yes
hsa-mir-127:MAPK4	hsa-mir-127	MAPK4	0	0	0	3.23147	-3.91527	-0.651045	8.00971	-5.73486	-0.778637	-0.714841	yes
hsa-mir-127:MAPT	hsa-mir-127	MAPT	0	0	0	1.48946	-3.91527	-0.58244	2.71047	-5.73486	-0.412621	-0.497531	yes
hsa-mir-127:MBNL1	hsa-mir-127	MBNL1	0	0	0	1.28608	-3.91527	-0.575172	1.58852	-5.73486	-0.710628	-0.6429	yes
hsa-mir-127:MCAM	hsa-mir-127	MCAM	0	0	0	1.67907	-3.91527	-0.712995	2.38746	-5.73486	-0.686775	-0.699885	yes
hsa-mir-127:MDH1B	hsa-mir-127	MDH1B	0	0	0	1.05199	-3.91527	-0.453358	2.12775	-5.73486	-0.57733	-0.515344	yes
hsa-mir-127:MFGE8	hsa-mir-127	MFGE8	0	0	0	1.7346	-3.91527	-0.445671	1.90497	-5.73486	-0.576859	-0.511265	yes
hsa-mir-127:MICAL1	hsa-mir-127	MICAL1	0	0	0	2.31477	-3.91527	-0.528676	2.7091	-5.73486	-0.735491	-0.632083	yes
hsa-mir-127:MICAL3	hsa-mir-127	MICAL3	0	0	0	1.40217	-3.91527	-0.526189	2.30206	-5.73486	-0.689034	-0.607611	yes
hsa-mir-127:MOAP1	hsa-mir-127	MOAP1	0	0	0	1.39891	-3.91527	-0.449629	1.52695	-5.73486	-0.519517	-0.484573	yes
hsa-mir-127:MORN5	hsa-mir-127	MORN5	0	0	0	3.22583	-3.91527	-0.606227	5.44901	-5.73486	-0.659201	-0.632714	yes
hsa-mir-127:MPP2	hsa-mir-127	MPP2	0	0	0	1.49064	-3.91527	-0.487319	2.71342	-5.73486	-0.561078	-0.524198	yes
hsa-mir-127:MPP7	hsa-mir-127	MPP7	0	0	0	2.33794	-3.91527	-0.592617	3.94999	-5.73486	-0.76498	-0.678798	yes
hsa-mir-127:MRVI1	hsa-mir-127	MRVI1	0	0	0	3.91154	-3.91527	-0.547475	4.86942	-5.73486	-0.669706	-0.60859	yes
hsa-mir-127:MSRB2	hsa-mir-127	MSRB2	0	0	0	1.27746	-3.91527	-0.53325	1.04251	-5.73486	-0.537605	-0.535428	yes
hsa-mir-127:MSRB3	hsa-mir-127	MSRB3	0	0	0	2.37352	-3.91527	-0.560067	2.36235	-5.73486	-0.599848	-0.579958	yes
hsa-mir-127:MTMR8	hsa-mir-127	MTMR8	0	0	0	1.18803	-3.91527	-0.623191	2.37431	-5.73486	-0.626809	-0.625	yes
hsa-mir-127:MUC1	hsa-mir-127	MUC1	0	0	0	1.48407	-3.91527	-0.525747	3.11649	-5.73486	-0.64687	-0.586309	yes
hsa-mir-127:MYBL1	hsa-mir-127	MYBL1	0	0	0	1.41648	-3.91527	-0.565392	1.65098	-5.73486	-0.539286	-0.552339	yes
hsa-mir-127:MYEF2	hsa-mir-127	MYEF2	0	0	0	1.91532	-3.91527	-0.592257	3.25863	-5.73486	-0.530577	-0.561417	yes
hsa-mir-127:MYH11	hsa-mir-127	MYH11	0	0	0	7.06596	-3.91527	-0.661848	10.5304	-5.73486	-0.735435	-0.698642	yes
hsa-mir-127:MYL9	hsa-mir-127	MYL9	0	0	0	3.22169	-3.91527	-0.591437	3.74927	-5.73486	-0.740251	-0.665844	yes
hsa-mir-127:MYLK	hsa-mir-127	MYLK	0	0	0	4.29416	-3.91527	-0.653385	5.7809	-5.73486	-0.754458	-0.703922	yes
hsa-mir-127:MYOCD	hsa-mir-127	MYOCD	0	0	0	4.61703	-3.91527	-0.453645	8.3224	-5.73486	-0.669778	-0.561711	yes
hsa-mir-127:MYOM1	hsa-mir-127	MYOM1	0	0	0	2.44858	-3.91527	-0.635543	4.27667	-5.73486	-0.530376	-0.58296	yes
hsa-mir-127:MYRIP	hsa-mir-127	MYRIP	0	0	0	1.05591	-3.91527	-0.46498	4.57681	-5.73486	-0.448222	-0.456601	yes
hsa-mir-127:N4BP2L1	hsa-mir-127	N4BP2L1	0	0	0	1.01106	-3.91527	-0.493269	1.61415	-5.73486	-0.519361	-0.506315	yes
hsa-mir-127:NACC2	hsa-mir-127	NACC2	0	0	0	1.44076	-3.91527	-0.462726	1.67962	-5.73486	-0.513599	-0.488163	yes
hsa-mir-127:NAV2	hsa-mir-127	NAV2	0	0	0	1.67621	-3.91527	-0.648566	2.47286	-5.73486	-0.640538	-0.644552	yes
hsa-mir-127:NBEA	hsa-mir-127	NBEA	0	1	1	1.62622	-3.91527	-0.492143	2.54617	-5.73486	-0.396869	-0.444506	yes
hsa-mir-127:NDE1	hsa-mir-127	NDE1	0	0	0	2.20432	-3.91527	-0.638042	1.8549	-5.73486	-0.627511	-0.632777	yes
hsa-mir-127:NDRG2	hsa-mir-127	NDRG2	0	0	0	2.11594	-3.91527	-0.581958	1.51271	-5.73486	-0.408974	-0.495466	yes
hsa-mir-127:NECAB1	hsa-mir-127	NECAB1	0	0	0	2.19193	-3.91527	-0.554057	2.50771	-5.73486	-0.672673	-0.613365	yes
hsa-mir-127:NEURL1B	hsa-mir-127	NEURL1B	0	0	0	1.71478	-3.91527	-0.68572	2.45528	-5.73486	-0.583256	-0.634488	yes
hsa-mir-127:NEXN	hsa-mir-127	NEXN	0	0	0	2.50991	-3.91527	-0.514469	2.17329	-5.73486	-0.625314	-0.569892	yes
hsa-mir-127:NFASC	hsa-mir-127	NFASC	0	0	0	3.12677	-3.91527	-0.492822	4.78378	-5.73486	-0.622616	-0.557719	yes
hsa-mir-127:NFIA	hsa-mir-127	NFIA	0	0	0	1.23279	-3.91527	-0.536607	2.06529	-5.73486	-0.49112	-0.513864	yes
hsa-mir-127:NFIB	hsa-mir-127	NFIB	0	0	0	1.13693	-3.91527	-0.42777	1.48739	-5.73486	-0.369076	-0.398423	yes
hsa-mir-127:NIPAL4	hsa-mir-127	NIPAL4	0	0	0	1.88052	-3.91527	-0.495096	4.94679	-5.73486	-0.604509	-0.549803	yes
hsa-mir-127:NMUR1	hsa-mir-127	NMUR1	0	0	0	1.2251	-3.91527	-0.446787	3.94764	-5.73486	-0.635248	-0.541017	yes
hsa-mir-127:NPAS4	hsa-mir-127	NPAS4	0	0	0	1.45693	-3.91527	-0.524856	4.48755	-5.73486	-0.669423	-0.597139	yes
hsa-mir-127:NPNT	hsa-mir-127	NPNT	0	0	0	2.57187	-3.91527	-0.495608	3.68399	-5.73486	-0.545564	-0.520586	yes
hsa-mir-127:NR2F2	hsa-mir-127	NR2F2	0	0	0	1.55303	-3.91527	-0.622405	2.15178	-5.73486	-0.495207	-0.558806	yes
hsa-mir-127:NUDT7	hsa-mir-127	NUDT7	0	0	0	1.36458	-3.91527	-0.533928	2.61484	-5.73486	-0.67324	-0.603584	yes
hsa-mir-127:NUP210	hsa-mir-127	NUP210	0	0	0	1.43348	-3.91527	-0.489857	1.86007	-5.73486	-0.450068	-0.469963	yes
hsa-mir-127:NXPH3	hsa-mir-127	NXPH3	0	0	0	1.97081	-3.91527	-0.43389	3.73459	-5.73486	-0.467023	-0.450456	yes
hsa-mir-127:OLFM1	hsa-mir-127	OLFM1	0	0	0	2.92977	-3.91527	-0.489881	3.24994	-5.73486	-0.514148	-0.502014	yes
hsa-mir-127:OSBPL10	hsa-mir-127	OSBPL10	0	0	0	1.53452	-3.91527	-0.516643	1.33001	-5.73486	-0.544178	-0.53041	yes
hsa-mir-127:P2RX1	hsa-mir-127	P2RX1	0	0	0	3.03098	-3.91527	-0.471405	4.88101	-5.73486	-0.590855	-0.53113	yes
hsa-mir-127:PAK3	hsa-mir-127	PAK3	0	0	0	2.12131	-3.91527	-0.53702	3.59681	-5.73486	-0.650234	-0.593627	yes
hsa-mir-127:PARD6A	hsa-mir-127	PARD6A	0	0	0	1.18015	-3.91527	-0.489582	1.64933	-5.73486	-0.568017	-0.528799	yes
hsa-mir-127:PARM1	hsa-mir-127	PARM1	0	0	0	2.27582	-3.91527	-0.601568	3.77651	-5.73486	-0.658942	-0.630255	yes
hsa-mir-127:PAWR	hsa-mir-127	PAWR	0	0	0	2.45666	-3.91527	-0.446059	2.19742	-5.73486	-0.419529	-0.432794	yes
hsa-mir-127:PBX1	hsa-mir-127	PBX1	0	0	0	2.21394	-3.91527	-0.535579	3.24353	-5.73486	-0.481981	-0.50878	yes
hsa-mir-127:PDE1C	hsa-mir-127	PDE1C	0	0	0	2.50342	-3.91527	-0.532188	4.11427	-5.73486	-0.611838	-0.572013	yes
hsa-mir-127:PDE4D	hsa-mir-127	PDE4D	0	0	0	2.45718	-3.91527	-0.604689	3.12203	-5.73486	-0.592065	-0.598377	yes
hsa-mir-127:PDE5A	hsa-mir-127	PDE5A	0	0	0	2.11918	-3.91527	-0.510335	3.23634	-5.73486	-0.457165	-0.48375	yes
hsa-mir-127:PDK3	hsa-mir-127	PDK3	0	0	0	1.34186	-3.91527	-0.458868	1.90291	-5.73486	-0.625206	-0.542037	yes
hsa-mir-127:PDK4	hsa-mir-127	PDK4	0	0	0	3.08705	-3.91527	-0.428712	3.56855	-5.73486	-0.481551	-0.455131	yes
hsa-mir-127:PDLIM3	hsa-mir-127	PDLIM3	0	0	0	3.85236	-3.91527	-0.58121	3.12038	-5.73486	-0.685075	-0.633142	yes
hsa-mir-127:PDLIM5	hsa-mir-127	PDLIM5	0	0	0	1.96168	-3.91527	-0.509483	2.1918	-5.73486	-0.547885	-0.528684	yes
hsa-mir-127:PFKP	hsa-mir-127	PFKP	0	0	0	1.92054	-3.91527	-0.667925	1.3193	-5.73486	-0.539031	-0.603478	yes
hsa-mir-127:PGM5	hsa-mir-127	PGM5	0	0	0	4.56451	-3.91527	-0.617235	6.15876	-5.73486	-0.678562	-0.647898	yes
hsa-mir-127:PGPEP1L	hsa-mir-127	PGPEP1L	0	0	0	1.84132	-3.91527	-0.52779	3.58607	-5.73486	-0.46223	-0.49501	yes
hsa-mir-127:PHEX	hsa-mir-127	PHEX	0	0	0	1.04267	-3.91527	-0.48682	2.64986	-5.73486	-0.570105	-0.528463	yes
hsa-mir-127:PHKA1	hsa-mir-127	PHKA1	0	0	0	1.47107	-3.91527	-0.46918	2.56949	-5.73486	-0.344861	-0.40702	yes
hsa-mir-127:PHKG1	hsa-mir-127	PHKG1	0	0	0	1.71764	-3.91527	-0.426034	4.31937	-5.73486	-0.637852	-0.531943	yes
hsa-mir-127:PHYHD1	hsa-mir-127	PHYHD1	0	0	0	1.23012	-3.91527	-0.496929	2.1032	-5.73486	-0.583614	-0.540272	yes
hsa-mir-127:PI15	hsa-mir-127	PI15	0	0	0	3.2148	-3.91527	-0.549336	4.53599	-5.73486	-0.530321	-0.539828	yes
hsa-mir-127:PLA2G16	hsa-mir-127	PLA2G16	0	0	0	1.20216	-3.91527	-0.42693	1.16442	-5.73486	-0.422771	-0.42485	yes
hsa-mir-127:PLA2G4C	hsa-mir-127	PLA2G4C	0	0	0	1.60957	-3.91527	-0.533558	2.15194	-5.73486	-0.578619	-0.556089	yes
hsa-mir-127:PLCB4	hsa-mir-127	PLCB4	0	0	0	1.9164	-3.91527	-0.614839	3.01212	-5.73486	-0.570272	-0.592556	yes
hsa-mir-127:PLEKHA7	hsa-mir-127	PLEKHA7	0	0	0	1.05932	-3.91527	-0.54819	1.48266	-5.73486	-0.430719	-0.489455	yes
hsa-mir-127:PLEKHG3	hsa-mir-127	PLEKHG3	0	0	0	2.06	-3.91527	-0.492498	2.70787	-5.73486	-0.528174	-0.510336	yes
hsa-mir-127:PLIN4	hsa-mir-127	PLIN4	0	0	0	2.54003	-3.91527	-0.558793	6.31623	-5.73486	-0.612749	-0.585771	yes
hsa-mir-127:PLXNA4	hsa-mir-127	PLXNA4	0	0	0	3.10815	-3.91527	-0.562848	5.34667	-5.73486	-0.64073	-0.601789	yes
hsa-mir-127:PLXNB1	hsa-mir-127	PLXNB1	0	0	0	1.61587	-3.91527	-0.622186	2.85362	-5.73486	-0.625184	-0.623685	yes
hsa-mir-127:PM20D2	hsa-mir-127	PM20D2	0	0	0	1.07922	-3.91527	-0.536805	1.41174	-5.73486	-0.513198	-0.525001	yes
hsa-mir-127:POPDC2	hsa-mir-127	POPDC2	0	0	0	2.86227	-3.91527	-0.451219	4.44605	-5.73486	-0.610354	-0.530786	yes
hsa-mir-127:PPARGC1A	hsa-mir-127	PPARGC1A	0	0	0	2.22798	-3.91527	-0.608367	4.95964	-5.73486	-0.626183	-0.617275	yes
hsa-mir-127:PPP1R12A	hsa-mir-127	PPP1R12A	0	0	0	1.5865	-3.91527	-0.471014	1.54179	-5.73486	-0.438276	-0.454645	yes
hsa-mir-127:PPP1R12B	hsa-mir-127	PPP1R12B	0	0	0	4.23498	-3.91527	-0.637961	6.01682	-5.73486	-0.71651	-0.677236	yes
hsa-mir-127:PPP1R14A	hsa-mir-127	PPP1R14A	0	0	0	3.51703	-3.91527	-0.631868	5.341	-5.73486	-0.70013	-0.665999	yes
hsa-mir-127:PPP1R14C	hsa-mir-127	PPP1R14C	0	0	0	1.44819	-3.91527	-0.478935	3.44919	-5.73486	-0.431455	-0.455195	yes
hsa-mir-127:PPP1R3B	hsa-mir-127	PPP1R3B	0	0	0	2.02099	-3.91527	-0.599214	2.76448	-5.73486	-0.772592	-0.685903	yes
hsa-mir-127:PPP1R3C	hsa-mir-127	PPP1R3C	0	0	0	1.67188	-3.91527	-0.493212	2.0945	-5.73486	-0.477983	-0.485597	yes
hsa-mir-127:PPP2R5A	hsa-mir-127	PPP2R5A	0	0	0	1.1677	-3.91527	-0.478333	1.07977	-5.73486	-0.627075	-0.552704	yes
hsa-mir-127:PRELP	hsa-mir-127	PRELP	0	0	0	2.43856	-3.91527	-0.451374	5.14377	-5.73486	-0.564667	-0.508021	yes
hsa-mir-127:PRKAA2	hsa-mir-127	PRKAA2	0	0	0	3.20895	-3.91527	-0.666952	4.50512	-5.73486	-0.604226	-0.635589	yes
hsa-mir-127:PRKAG2	hsa-mir-127	PRKAG2	0	0	0	2.07694	-3.91527	-0.53525	2.02085	-5.73486	-0.599484	-0.567367	yes
hsa-mir-127:PRKD1	hsa-mir-127	PRKD1	0	0	0	1.3446	-3.91527	-0.43226	1.27711	-5.73486	-0.37039	-0.401325	yes
hsa-mir-127:PRRG4	hsa-mir-127	PRRG4	0	0	0	1.03812	-3.91527	-0.538696	3.03	-5.73486	-0.698482	-0.618589	yes
hsa-mir-127:PRTFDC1	hsa-mir-127	PRTFDC1	0	0	0	1.30021	-3.91527	-0.529253	2.1641	-5.73486	-0.670159	-0.599706	yes
hsa-mir-127:PRUNE2	hsa-mir-127	PRUNE2	0	0	0	2.56389	-3.91527	-0.637365	4.38776	-5.73486	-0.68672	-0.662042	yes
hsa-mir-127:PTCHD1	hsa-mir-127	PTCHD1	0	0	0	2.51305	-3.91527	-0.62051	5.71465	-5.73486	-0.759886	-0.690198	yes
hsa-mir-127:PTPRF	hsa-mir-127	PTPRF	0	0	0	1.72818	-3.91527	-0.495115	2.2846	-5.73486	-0.531563	-0.513339	yes
hsa-mir-127:PYGB	hsa-mir-127	PYGB	0	0	0	1.48509	-3.91527	-0.552431	1.65016	-5.73486	-0.546232	-0.549331	yes
hsa-mir-127:RAB23	hsa-mir-127	RAB23	0	0	0	1.47942	-3.91527	-0.455797	2.15016	-5.73486	-0.45144	-0.453618	yes
hsa-mir-127:RAB3D	hsa-mir-127	RAB3D	0	0	0	1.58688	-3.91527	-0.514898	2.45076	-5.73486	-0.603533	-0.559215	yes
hsa-mir-127:RAB9B	hsa-mir-127	RAB9B	0	0	0	3.7442	-3.91527	-0.581811	4.47817	-5.73486	-0.677893	-0.629852	yes
hsa-mir-127:RABGAP1	hsa-mir-127	RABGAP1	0	0	0	1.2923	-3.91527	-0.499705	1.62246	-5.73486	-0.56821	-0.533957	yes
hsa-mir-127:RAMP1	hsa-mir-127	RAMP1	0	0	0	4.65	-3.91527	-0.572786	4.09387	-5.73486	-0.731386	-0.652086	yes
hsa-mir-127:RAP1A	hsa-mir-127	RAP1A	0	0	0	1.04971	-3.91527	-0.49188	1.31157	-5.73486	-0.680464	-0.586172	yes
hsa-mir-127:RAP1GAP2	hsa-mir-127	RAP1GAP2	0	0	0	1.14028	-3.91527	-0.501808	1.70036	-5.73486	-0.447486	-0.474647	yes
hsa-mir-127:RAPGEF5	hsa-mir-127	RAPGEF5	0	0	0	1.39301	-3.91527	-0.607008	2.35113	-5.73486	-0.531089	-0.569049	yes
hsa-mir-127:RASD2	hsa-mir-127	RASD2	0	0	0	2.17704	-3.91527	-0.468122	3.47186	-5.73486	-0.579887	-0.524005	yes
hsa-mir-127:RASGRP2	hsa-mir-127	RASGRP2	0	0	0	1.59422	-3.91527	-0.519711	2.40685	-5.73486	-0.432184	-0.475947	yes
hsa-mir-127:RASL11A	hsa-mir-127	RASL11A	0	0	0	2.67297	-3.91527	-0.497745	3.45709	-5.73486	-0.552719	-0.525232	yes
hsa-mir-127:RASL12	hsa-mir-127	RASL12	0	0	0	4.75825	-3.91527	-0.63306	5.7101	-5.73486	-0.668386	-0.650723	yes
hsa-mir-127:RASSF3	hsa-mir-127	RASSF3	0	0	0	2.92968	-3.91527	-0.622141	3.433	-5.73486	-0.600674	-0.611407	yes
hsa-mir-127:RBM24	hsa-mir-127	RBM24	0	0	0	3.40613	-3.91527	-0.592865	3.1791	-5.73486	-0.577557	-0.585211	yes
hsa-mir-127:RBM38	hsa-mir-127	RBM38	0	0	0	2.37233	-3.91527	-0.626035	2.36147	-5.73486	-0.629768	-0.627902	yes
hsa-mir-127:RBPMS	hsa-mir-127	RBPMS	0	0	0	2.62853	-3.91527	-0.605023	3.81347	-5.73486	-0.70493	-0.654976	yes
hsa-mir-127:RDH5	hsa-mir-127	RDH5	0	0	0	2.54404	-3.91527	-0.511149	3.39967	-5.73486	-0.640819	-0.575984	yes
hsa-mir-127:RDM1	hsa-mir-127	RDM1	0	0	0	1.25993	-3.91527	-0.573554	2.14672	-5.73486	-0.549827	-0.56169	yes
hsa-mir-127:REEP1	hsa-mir-127	REEP1	0	0	0	3.01472	-3.91527	-0.452879	4.15246	-5.73486	-0.499467	-0.476173	yes
hsa-mir-127:RHBDL3	hsa-mir-127	RHBDL3	0	0	0	1.47035	-3.91527	-0.456828	4.01497	-5.73486	-0.670133	-0.563481	yes
hsa-mir-127:RHOB	hsa-mir-127	RHOB	0	0	0	1.90649	-3.91527	-0.438984	2.00264	-5.73486	-0.458197	-0.448591	yes
hsa-mir-127:RIMS3	hsa-mir-127	RIMS3	0	0	0	2.30178	-3.91527	-0.577973	3.80209	-5.73486	-0.699227	-0.6386	yes
hsa-mir-127:RNASE4	hsa-mir-127	RNASE4	0	0	0	2.25817	-3.91527	-0.53602	2.35768	-5.73486	-0.58206	-0.55904	yes
hsa-mir-127:RNF112	hsa-mir-127	RNF112	0	0	0	2.40133	-3.91527	-0.464698	4.80557	-5.73486	-0.633531	-0.549114	yes
hsa-mir-127:RNF165	hsa-mir-127	RNF165	0	0	0	1.54703	-3.91527	-0.529766	4.0913	-5.73486	-0.622119	-0.575943	yes
hsa-mir-127:RNF38	hsa-mir-127	RNF38	0	0	0	1.17401	-3.91527	-0.577998	1.67427	-5.73486	-0.573285	-0.575642	yes
hsa-mir-127:ROCK1	hsa-mir-127	ROCK1	0	0	0	1.02516	-3.91527	-0.687128	1.52244	-5.73486	-0.633439	-0.660284	yes
hsa-mir-127:ROPN1B	hsa-mir-127	ROPN1B	0	0	0	1.48235	-3.91527	-0.544443	4.59943	-5.73486	-0.678529	-0.611486	yes
hsa-mir-127:RPE65	hsa-mir-127	RPE65	0	0	0	4.13256	-3.91527	-0.536698	6.82475	-5.73486	-0.644546	-0.590622	yes
hsa-mir-127:RPS6KA5	hsa-mir-127	RPS6KA5	0	0	0	1.29091	-3.91527	-0.428535	2.01204	-5.73486	-0.488077	-0.458306	yes
hsa-mir-127:RRAS	hsa-mir-127	RRAS	0	0	0	1.61534	-3.91527	-0.498886	1.11524	-5.73486	-0.496816	-0.497851	yes
hsa-mir-127:RYR3	hsa-mir-127	RYR3	0	0	0	2.56998	-3.91527	-0.50581	4.17654	-5.73486	-0.675697	-0.590753	yes
hsa-mir-127:SALL2	hsa-mir-127	SALL2	0	0	0	1.42099	-3.91527	-0.467835	2.37925	-5.73486	-0.465353	-0.466594	yes
hsa-mir-127:SAMD13	hsa-mir-127	SAMD13	0	0	0	1.27045	-3.91527	-0.604506	1.96104	-5.73486	-0.501041	-0.552773	yes
hsa-mir-127:SCARA3	hsa-mir-127	SCARA3	0	0	0	1.6047	-3.91527	-0.499341	2.7526	-5.73486	-0.413401	-0.456371	yes
hsa-mir-127:SCHIP1	hsa-mir-127	SCHIP1	0	0	0	1.2699	-3.91527	-0.553002	1.75495	-5.73486	-0.634445	-0.593723	yes
hsa-mir-127:SCRG1	hsa-mir-127	SCRG1	0	0	0	3.48719	-3.91527	-0.484007	5.86784	-5.73486	-0.52946	-0.506734	yes
hsa-mir-127:SDC4	hsa-mir-127	SDC4	0	0	0	1.22259	-3.91527	-0.518355	1.99743	-5.73486	-0.599758	-0.559057	yes
hsa-mir-127:SDPR	hsa-mir-127	SDPR	0	0	0	2.35385	-3.91527	-0.554054	2.83094	-5.73486	-0.582061	-0.568058	yes
hsa-mir-127:SELENBP1	hsa-mir-127	SELENBP1	0	0	0	2.77095	-3.91527	-0.521309	2.93399	-5.73486	-0.654668	-0.587988	yes
hsa-mir-127:SEMA4B	hsa-mir-127	SEMA4B	0	0	0	1.32208	-3.91527	-0.651075	1.97913	-5.73486	-0.487653	-0.569364	yes
hsa-mir-127:SERPINI2	hsa-mir-127	SERPINI2	0	0	0	2.24815	-3.91527	-0.602255	3.71126	-5.73486	-0.557569	-0.579912	yes
hsa-mir-127:SETBP1	hsa-mir-127	SETBP1	0	0	0	1.14067	-3.91527	-0.55582	2.10324	-5.73486	-0.467707	-0.511764	yes
hsa-mir-127:SETMAR	hsa-mir-127	SETMAR	0	0	0	1.1233	-3.91527	-0.453974	2.33074	-5.73486	-0.748032	-0.601003	yes
hsa-mir-127:SGSM1	hsa-mir-127	SGSM1	0	0	0	1.39835	-3.91527	-0.519623	4.97566	-5.73486	-0.694275	-0.606949	yes
hsa-mir-127:SH3BGR	hsa-mir-127	SH3BGR	0	0	0	2.65372	-3.91527	-0.463513	2.68538	-5.73486	-0.417385	-0.440449	yes
hsa-mir-127:SH3BGRL	hsa-mir-127	SH3BGRL	0	0	0	1.89247	-3.91527	-0.526104	1.71198	-5.73486	-0.691917	-0.60901	yes
hsa-mir-127:SH3GL2	hsa-mir-127	SH3GL2	0	0	0	1.62308	-3.91527	-0.444278	4.7273	-5.73486	-0.497631	-0.470954	yes
hsa-mir-127:SLC20A2	hsa-mir-127	SLC20A2	0	0	0	1.93297	-3.91527	-0.529312	1.48499	-5.73486	-0.508608	-0.51896	yes
hsa-mir-127:SLC22A3	hsa-mir-127	SLC22A3	0	0	0	2.74613	-3.91527	-0.482255	4.9654	-5.73486	-0.595609	-0.538932	yes
hsa-mir-127:SLC24A3	hsa-mir-127	SLC24A3	0	0	0	3.68857	-3.91527	-0.487278	4.79673	-5.73486	-0.524876	-0.506077	yes
hsa-mir-127:SLC24A5	hsa-mir-127	SLC24A5	0	0	0	1.73229	-3.91527	-0.635556	1.61819	-5.73486	-0.482017	-0.558786	yes
hsa-mir-127:SLC25A4	hsa-mir-127	SLC25A4	0	0	0	2.13392	-3.91527	-0.567893	2.55804	-5.73486	-0.448581	-0.508237	yes
hsa-mir-127:SLC2A9	hsa-mir-127	SLC2A9	0	0	0	1.24252	-3.91527	-0.443427	2.68039	-5.73486	-0.603521	-0.523474	yes
hsa-mir-127:SLC38A1	hsa-mir-127	SLC38A1	0	0	0	1.76037	-3.91527	-0.507107	2.68053	-5.73486	-0.530582	-0.518844	yes
hsa-mir-127:SLC47A1	hsa-mir-127	SLC47A1	0	0	0	2.10111	-3.91527	-0.44104	4.5628	-5.73486	-0.692378	-0.566709	yes
hsa-mir-127:SLC8A1	hsa-mir-127	SLC8A1	0	0	0	2.31977	-3.91527	-0.488993	2.7256	-5.73486	-0.644226	-0.56661	yes
hsa-mir-127:SLFN13	hsa-mir-127	SLFN13	0	0	0	1.93756	-3.91527	-0.476139	3.88381	-5.73486	-0.665405	-0.570772	yes
hsa-mir-127:SLMAP	hsa-mir-127	SLMAP	0	0	0	3.00478	-3.91527	-0.652284	3.53085	-5.73486	-0.674952	-0.663618	yes
hsa-mir-127:SMTN	hsa-mir-127	SMTN	0	0	0	2.00531	-3.91527	-0.61592	2.73718	-5.73486	-0.685891	-0.650906	yes
hsa-mir-127:SNTA1	hsa-mir-127	SNTA1	0	0	0	1.13426	-3.91527	-0.536301	1.53843	-5.73486	-0.543481	-0.539891	yes
hsa-mir-127:SOD3	hsa-mir-127	SOD3	0	0	0	2.97071	-3.91527	-0.502548	4.23156	-5.73486	-0.622966	-0.562757	yes
hsa-mir-127:SORBS1	hsa-mir-127	SORBS1	0	0	0	4.81397	-3.91527	-0.590788	4.18265	-5.73486	-0.678462	-0.634625	yes
hsa-mir-127:SORT1	hsa-mir-127	SORT1	0	0	0	2.01449	-3.91527	-0.619122	1.56999	-5.73486	-0.533484	-0.576303	yes
hsa-mir-127:SPARCL1	hsa-mir-127	SPARCL1	0	0	0	1.82633	-3.91527	-0.463482	2.43174	-5.73486	-0.423666	-0.443574	yes
hsa-mir-127:SPEG	hsa-mir-127	SPEG	0	0	0	3.48388	-3.91527	-0.46176	3.81905	-5.73486	-0.665715	-0.563738	yes
hsa-mir-127:SPINK13	hsa-mir-127	SPINK13	0	0	0	2.18503	-3.91527	-0.461761	3.25776	-5.73486	-0.449087	-0.455424	yes
hsa-mir-127:SPOP	hsa-mir-127	SPOP	0	0	0	1.164	-3.91527	-0.574699	1.37404	-5.73486	-0.629052	-0.601876	yes
hsa-mir-127:SPTB	hsa-mir-127	SPTB	0	0	0	1.44452	-3.91527	-0.422671	2.75301	-5.73486	-0.350568	-0.38662	yes
hsa-mir-127:SRC	hsa-mir-127	SRC	0	0	0	1.08493	-3.91527	-0.527328	1.65024	-5.73486	-0.656244	-0.591786	yes
hsa-mir-127:SRF	hsa-mir-127	SRF	0	0	0	1.20607	-3.91527	-0.595234	1.10326	-5.73486	-0.63242	-0.613827	yes
hsa-mir-127:ST5	hsa-mir-127	ST5	0	0	0	1.50528	-3.91527	-0.534196	1.22432	-5.73486	-0.531447	-0.532821	yes
hsa-mir-127:ST6GAL1	hsa-mir-127	ST6GAL1	0	0	0	1.0794	-3.91527	-0.474032	1.62276	-5.73486	-0.516395	-0.495214	yes
hsa-mir-127:STAT5B	hsa-mir-127	STAT5B	0	0	0	1.02891	-3.91527	-0.427197	1.49677	-5.73486	-0.642628	-0.534913	yes
hsa-mir-127:STBD1	hsa-mir-127	STBD1	0	1	1	1.98738	-3.91527	-0.592583	1.98973	-5.73486	-0.642325	-0.617454	yes
hsa-mir-127:STXBP5L	hsa-mir-127	STXBP5L	0	0	0	2.21379	-3.91527	-0.424207	4.84474	-5.73486	-0.450893	-0.43755	yes
hsa-mir-127:SUSD5	hsa-mir-127	SUSD5	0	0	0	2.45097	-3.91527	-0.463449	4.08447	-5.73486	-0.453944	-0.458696	yes
hsa-mir-127:SVIL	hsa-mir-127	SVIL	0	0	0	2.70157	-3.91527	-0.525848	2.91817	-5.73486	-0.542307	-0.534077	yes
hsa-mir-127:SYNE2	hsa-mir-127	SYNE2	0	0	0	1.51784	-3.91527	-0.665505	2.50199	-5.73486	-0.517103	-0.591304	yes
hsa-mir-127:SYNM	hsa-mir-127	SYNM	0	0	0	4.38796	-3.91527	-0.589602	4.76109	-5.73486	-0.644615	-0.617109	yes
hsa-mir-127:SYNPO2	hsa-mir-127	SYNPO2	0	0	0	5.3995	-3.91527	-0.6468	5.4819	-5.73486	-0.697037	-0.671919	yes
hsa-mir-127:SYT2	hsa-mir-127	SYT2	0	0	0	1.38725	-3.91527	-0.463082	2.4984	-5.73486	-0.444554	-0.453818	yes
hsa-mir-127:TACC1	hsa-mir-127	TACC1	0	0	0	1.43806	-3.91527	-0.589758	1.60897	-5.73486	-0.58991	-0.589834	yes
hsa-mir-127:TACC2	hsa-mir-127	TACC2	0	0	0	2.3526	-3.91527	-0.546988	2.84051	-5.73486	-0.643745	-0.595366	yes
hsa-mir-127:TAGLN	hsa-mir-127	TAGLN	0	0	0	4.1688	-3.91527	-0.585008	4.45757	-5.73486	-0.719175	-0.652092	yes
hsa-mir-127:TBC1D1	hsa-mir-127	TBC1D1	0	0	0	1.00726	-3.91527	-0.508539	1.19894	-5.73486	-0.484614	-0.496576	yes
hsa-mir-127:TCEAL2	hsa-mir-127	TCEAL2	0	0	0	3.99753	-3.91527	-0.543006	6.79666	-5.73486	-0.617087	-0.580046	yes
hsa-mir-127:TCEAL3	hsa-mir-127	TCEAL3	0	0	0	2.12456	-3.91527	-0.422225	2.07294	-5.73486	-0.675244	-0.548735	yes
hsa-mir-127:TCEAL6	hsa-mir-127	TCEAL6	0	0	0	1.236	-3.91527	-0.483164	2.38695	-5.73486	-0.636884	-0.560024	yes
hsa-mir-127:TEAD3	hsa-mir-127	TEAD3	0	0	0	1.37004	-3.91527	-0.589361	2.02086	-5.73486	-0.75555	-0.672455	yes
hsa-mir-127:TGFB1I1	hsa-mir-127	TGFB1I1	0	0	0	1.64591	-3.91527	-0.569824	2.05257	-5.73486	-0.640306	-0.605065	yes
hsa-mir-127:THSD4	hsa-mir-127	THSD4	0	0	0	2.48878	-3.91527	-0.502614	4.08518	-5.73486	-0.52322	-0.512917	yes
hsa-mir-127:TINAGL1	hsa-mir-127	TINAGL1	0	0	0	2.21071	-3.91527	-0.598721	3.14874	-5.73486	-0.51639	-0.557556	yes
hsa-mir-127:TLE2	hsa-mir-127	TLE2	0	0	0	2.70514	-3.91527	-0.583712	3.95531	-5.73486	-0.540007	-0.561859	yes
hsa-mir-127:TMEM106C	hsa-mir-127	TMEM106C	0	0	0	1.11016	-3.91527	-0.500341	1.28908	-5.73486	-0.492362	-0.496351	yes
hsa-mir-127:TMEM108	hsa-mir-127	TMEM108	0	0	0	1.76576	-3.91527	-0.435331	2.65731	-5.73486	-0.445904	-0.440618	yes
hsa-mir-127:TMEM159	hsa-mir-127	TMEM159	0	0	0	1.51591	-3.91527	-0.512125	2.09943	-5.73486	-0.584818	-0.548471	yes
hsa-mir-127:TMEM47	hsa-mir-127	TMEM47	0	0	0	2.74397	-3.91527	-0.497948	3.23244	-5.73486	-0.689146	-0.593547	yes
hsa-mir-127:TMEM56	hsa-mir-127	TMEM56	0	0	0	1.4719	-3.91527	-0.672256	3.10121	-5.73486	-0.605161	-0.638708	yes
hsa-mir-127:TMIE	hsa-mir-127	TMIE	0	0	0	1.45535	-3.91527	-0.514673	4.25643	-5.73486	-0.68767	-0.601171	yes
hsa-mir-127:TMOD1	hsa-mir-127	TMOD1	0	0	0	1.61096	-3.91527	-0.512095	3.44746	-5.73486	-0.690512	-0.601304	yes
hsa-mir-127:TNFAIP8L3	hsa-mir-127	TNFAIP8L3	0	0	0	2.5293	-3.91527	-0.579871	3.58445	-5.73486	-0.596888	-0.588379	yes
hsa-mir-127:TNS1	hsa-mir-127	TNS1	0	0	0	2.3668	-3.91527	-0.523166	2.9301	-5.73486	-0.688179	-0.605673	yes
hsa-mir-127:TP73	hsa-mir-127	TP73	0	0	0	1.69148	-3.91527	-0.578283	4.17163	-5.73486	-0.592099	-0.585191	yes
hsa-mir-127:TPD52L1	hsa-mir-127	TPD52L1	0	0	0	2.9722	-3.91527	-0.460444	3.50784	-5.73486	-0.476926	-0.468685	yes
hsa-mir-127:TPM2	hsa-mir-127	TPM2	0	0	0	3.19868	-3.91527	-0.585465	2.68703	-5.73486	-0.633034	-0.60925	yes
hsa-mir-127:TPPP	hsa-mir-127	TPPP	0	0	0	1.59466	-3.91527	-0.472619	4.66614	-5.73486	-0.669695	-0.571157	yes
hsa-mir-127:TRAF1	hsa-mir-127	TRAF1	0	0	0	1.03675	-3.91527	-0.494548	1.78849	-5.73486	-0.583996	-0.539272	yes
hsa-mir-127:TRAF5	hsa-mir-127	TRAF5	0	0	0	1.6332	-3.91527	-0.477182	1.8902	-5.73486	-0.665059	-0.57112	yes
hsa-mir-127:TRIM45	hsa-mir-127	TRIM45	0	0	0	1.04055	-3.91527	-0.547714	1.86306	-5.73486	-0.439868	-0.493791	yes
hsa-mir-127:TRIM6	hsa-mir-127	TRIM6	0	0	0	1.36113	-3.91527	-0.450004	2.01825	-5.73486	-0.381944	-0.415974	yes
hsa-mir-127:TRIM7	hsa-mir-127	TRIM7	0	0	0	1.50652	-3.91527	-0.548564	2.11819	-5.73486	-0.467351	-0.507957	yes
hsa-mir-127:TRPC4	hsa-mir-127	TRPC4	0	0	0	2.46363	-3.91527	-0.589458	3.63728	-5.73486	-0.433223	-0.51134	yes
hsa-mir-127:TSPAN2	hsa-mir-127	TSPAN2	0	0	0	3.53279	-3.91527	-0.527429	4.13741	-5.73486	-0.758564	-0.642997	yes
hsa-mir-127:TTLL7	hsa-mir-127	TTLL7	0	0	0	1.6595	-3.91527	-0.547766	3.00158	-5.73486	-0.560854	-0.55431	yes
hsa-mir-127:TTPA	hsa-mir-127	TTPA	0	0	0	1.11305	-3.91527	-0.53727	2.31269	-5.73486	-0.620292	-0.578781	yes
hsa-mir-127:TUB	hsa-mir-127	TUB	0	0	0	1.60684	-3.91527	-0.45498	1.96977	-5.73486	-0.542816	-0.498898	yes
hsa-mir-127:TUBA4A	hsa-mir-127	TUBA4A	0	0	0	2.08296	-3.91527	-0.51584	2.11064	-5.73486	-0.54626	-0.53105	yes
hsa-mir-127:TXNDC16	hsa-mir-127	TXNDC16	0	0	0	1.25123	-3.91527	-0.585967	2.12281	-5.73486	-0.559182	-0.572575	yes
hsa-mir-127:UNC45A	hsa-mir-127	UNC45A	0	0	0	1.02039	-3.91527	-0.551369	1.48055	-5.73486	-0.67663	-0.613999	yes
hsa-mir-127:VIPR2	hsa-mir-127	VIPR2	0	0	0	1.28432	-3.91527	-0.496839	4.5377	-5.73486	-0.495672	-0.496256	yes
hsa-mir-127:VLDLR	hsa-mir-127	VLDLR	0	0	0	1.28261	-3.91527	-0.452722	2.35631	-5.73486	-0.496316	-0.474519	yes
hsa-mir-127:VTN	hsa-mir-127	VTN	0	0	0	1.48647	-3.91527	-0.485917	4.41896	-5.73486	-0.536765	-0.511341	yes
hsa-mir-127:WBSCR17	hsa-mir-127	WBSCR17	0	0	0	3.10503	-3.91527	-0.52752	5.58643	-5.73486	-0.587752	-0.557636	yes
hsa-mir-127:WDR1	hsa-mir-127	WDR1	0	0	0	1.12688	-3.91527	-0.598915	1.40018	-5.73486	-0.546113	-0.572514	yes
hsa-mir-127:WDR49	hsa-mir-127	WDR49	0	0	0	2.6254	-3.91527	-0.657238	4.79033	-5.73486	-0.723494	-0.690366	yes
hsa-mir-127:WFDC1	hsa-mir-127	WFDC1	0	0	0	4.03047	-3.91527	-0.511136	5.21645	-5.73486	-0.532416	-0.521776	yes
hsa-mir-127:WFDC10B	hsa-mir-127	WFDC10B	0	0	0	1.64628	-3.91527	-0.497978	2.05958	-5.73486	-0.549669	-0.523824	yes
hsa-mir-127:WFDC2	hsa-mir-127	WFDC2	0	0	0	4.97497	-3.91527	-0.586036	7.76012	-5.73486	-0.715475	-0.650755	yes
hsa-mir-127:WFDC3	hsa-mir-127	WFDC3	0	0	0	2.01751	-3.91527	-0.572675	1.85825	-5.73486	-0.489572	-0.531123	yes
hsa-mir-127:XK	hsa-mir-127	XK	0	0	0	1.67294	-3.91527	-0.480379	4.4071	-5.73486	-0.639031	-0.559705	yes
hsa-mir-127:YPEL1	hsa-mir-127	YPEL1	0	0	0	1.00121	-3.91527	-0.576151	2.11839	-5.73486	-0.659166	-0.617659	yes
hsa-mir-127:YWHAH	hsa-mir-127	YWHAH	0	0	0	1.15643	-3.91527	-0.537618	1.34749	-5.73486	-0.543826	-0.540722	yes
hsa-mir-127:ZAK	hsa-mir-127	ZAK	0	0	0	1.78393	-3.91527	-0.578116	2.72034	-5.73486	-0.568221	-0.573169	yes
hsa-mir-127:ZBTB16	hsa-mir-127	ZBTB16	0	0	0	3.13387	-3.91527	-0.5265	3.93823	-5.73486	-0.565406	-0.545953	yes
hsa-mir-127:ZBTB47	hsa-mir-127	ZBTB47	0	0	0	1.06368	-3.91527	-0.43331	1.26619	-5.73486	-0.463624	-0.448467	yes
hsa-mir-127:ZDHHC15	hsa-mir-127	ZDHHC15	0	0	0	1.20491	-3.91527	-0.578814	2.82177	-5.73486	-0.472759	-0.525786	yes
hsa-mir-127:ZFP57	hsa-mir-127	ZFP57	0	0	0	1.3959	-3.91527	-0.681853	5.12637	-5.73486	-0.655487	-0.66867	yes
hsa-mir-127:ZFYVE21	hsa-mir-127	ZFYVE21	0	0	0	1.29488	-3.91527	-0.544397	1.2899	-5.73486	-0.512211	-0.528304	yes
hsa-mir-127:ZMAT1	hsa-mir-127	ZMAT1	0	0	0	1.34451	-3.91527	-0.534268	1.9884	-5.73486	-0.511057	-0.522662	yes
hsa-mir-127:ZMYND10	hsa-mir-127	ZMYND10	0	0	0	1.07635	-3.91527	-0.608921	2.57594	-5.73486	-0.484497	-0.546709	yes
hsa-mir-127:ZNF219	hsa-mir-127	ZNF219	0	0	0	1.55379	-3.91527	-0.507412	2.25973	-5.73486	-0.576336	-0.541874	yes
hsa-mir-127:ZNF367	hsa-mir-127	ZNF367	0	0	0	1.5853	-3.91527	-0.685842	2.11095	-5.73486	-0.583864	-0.634853	yes
hsa-mir-127:ZNF519	hsa-mir-127	ZNF519	0	0	0	1.02511	-3.91527	-0.458861	1.34343	-5.73486	-0.49199	-0.475425	yes
hsa-mir-127:ZNF620	hsa-mir-127	ZNF620	0	0	0	1.24941	-3.91527	-0.696056	2.53168	-5.73486	-0.638571	-0.667314	yes
hsa-mir-127:ZNF711	hsa-mir-127	ZNF711	0	0	0	2.25646	-3.91527	-0.601074	2.82552	-5.73486	-0.377961	-0.489517	yes
hsa-mir-127:ZNF774	hsa-mir-127	ZNF774	0	0	0	1.18302	-3.91527	-0.563822	2.34551	-5.73486	-0.471022	-0.517422	yes
hsa-mir-127:ZNF860	hsa-mir-127	ZNF860	0	0	0	1.24706	-3.91527	-0.488018	1.85608	-5.73486	-0.499103	-0.493561	yes
hsa-mir-134:A2M	hsa-mir-134	A2M	0	0	0	1.89011	-4.6385	-0.587609	2.43404	-6.4353	-0.537903	-0.562756	yes
hsa-mir-134:A4GALT	hsa-mir-134	A4GALT	0	0	0	1.16994	-4.6385	-0.544495	1.53993	-6.4353	-0.510774	-0.527634	yes
hsa-mir-134:ABCB10	hsa-mir-134	ABCB10	0	0	0	1.1519	-4.6385	-0.561608	1.2738	-6.4353	-0.66812	-0.614864	yes
hsa-mir-134:ABI3BP	hsa-mir-134	ABI3BP	0	0	0	1.10052	-4.6385	-0.47686	1.52282	-6.4353	-0.421057	-0.448959	yes
hsa-mir-134:ACBD4	hsa-mir-134	ACBD4	0	0	0	1.06043	-4.6385	-0.431298	1.92618	-6.4353	-0.667292	-0.549295	yes
hsa-mir-134:ACOT1	hsa-mir-134	ACOT1	0	0	0	1.02697	-4.6385	-0.495632	1.47032	-6.4353	-0.480799	-0.488215	yes
hsa-mir-134:ACOT2	hsa-mir-134	ACOT2	0	0	0	1.22481	-4.6385	-0.445412	1.63338	-6.4353	-0.442996	-0.444204	yes
hsa-mir-134:ACTA2	hsa-mir-134	ACTA2	0	0	0	3.13702	-4.6385	-0.450628	3.97118	-6.4353	-0.626064	-0.538346	yes
hsa-mir-134:ACTC1	hsa-mir-134	ACTC1	0	0	0	3.82861	-4.6385	-0.435229	3.19107	-6.4353	-0.373047	-0.404138	yes
hsa-mir-134:ACTG2	hsa-mir-134	ACTG2	0	0	0	6.08172	-4.6385	-0.626976	6.28231	-6.4353	-0.632322	-0.629649	yes
hsa-mir-134:ACTN1	hsa-mir-134	ACTN1	0	0	0	1.65095	-4.6385	-0.542678	1.7869	-6.4353	-0.547406	-0.545042	yes
hsa-mir-134:ADAM22	hsa-mir-134	ADAM22	0	0	0	2.90567	-4.6385	-0.753592	4.98611	-6.4353	-0.684773	-0.719182	yes
hsa-mir-134:ADAMTS1	hsa-mir-134	ADAMTS1	0	0	0	1.7897	-4.6385	-0.562211	1.79963	-6.4353	-0.468283	-0.515247	yes
hsa-mir-134:ADCY5	hsa-mir-134	ADCY5	0	0	0	3.42003	-4.6385	-0.673492	6.42722	-6.4353	-0.649038	-0.661265	yes
hsa-mir-134:ADCY9	hsa-mir-134	ADCY9	0	0	0	1.13699	-4.6385	-0.526487	1.62548	-6.4353	-0.608378	-0.567432	yes
hsa-mir-134:ADH6	hsa-mir-134	ADH6	0	0	0	1.14551	-4.6385	-0.622902	1.68322	-6.4353	-0.473181	-0.548042	yes
hsa-mir-134:ADHFE1	hsa-mir-134	ADHFE1	0	0	0	2.24844	-4.6385	-0.679257	2.97818	-6.4353	-0.613652	-0.646455	yes
hsa-mir-134:ADRB2	hsa-mir-134	ADRB2	0	0	0	2.22793	-4.6385	-0.652454	2.72037	-6.4353	-0.660039	-0.656247	yes
hsa-mir-134:AES	hsa-mir-134	AES	0	0	0	1.23635	-4.6385	-0.439142	1.01284	-6.4353	-0.467251	-0.453196	yes
hsa-mir-134:AKAP1	hsa-mir-134	AKAP1	0	0	0	2.61448	-4.6385	-0.663617	3.1421	-6.4353	-0.736948	-0.700283	yes
hsa-mir-134:AKAP12	hsa-mir-134	AKAP12	0	0	0	1.19915	-4.6385	-0.473084	1.94037	-6.4353	-0.414315	-0.4437	yes
hsa-mir-134:AKAP5	hsa-mir-134	AKAP5	0	0	0	1.21945	-4.6385	-0.550638	2.12179	-6.4353	-0.397404	-0.474021	yes
hsa-mir-134:AKAP6	hsa-mir-134	AKAP6	0	0	0	3.02541	-4.6385	-0.687501	3.50761	-6.4353	-0.623827	-0.655664	yes
hsa-mir-134:AKT3	hsa-mir-134	AKT3	0	0	0	1.09271	-4.6385	-0.510376	1.77601	-6.4353	-0.493897	-0.502137	yes
hsa-mir-134:ALCAM	hsa-mir-134	ALCAM	0	0	0	1.83717	-4.6385	-0.455216	1.85074	-6.4353	-0.433183	-0.4442	yes
hsa-mir-134:ALDH1B1	hsa-mir-134	ALDH1B1	0	0	0	3.50893	-4.6385	-0.641068	2.92292	-6.4353	-0.676743	-0.658906	yes
hsa-mir-134:ALDH3A2	hsa-mir-134	ALDH3A2	0	0	0	1.44111	-4.6385	-0.563719	1.9018	-6.4353	-0.59038	-0.57705	yes
hsa-mir-134:ALPK3	hsa-mir-134	ALPK3	0	0	0	1.54127	-4.6385	-0.525057	1.88418	-6.4353	-0.517518	-0.521288	yes
hsa-mir-134:ALS2CL	hsa-mir-134	ALS2CL	0	0	0	1.15449	-4.6385	-0.457531	1.68446	-6.4353	-0.568576	-0.513054	yes
hsa-mir-134:ANG	hsa-mir-134	ANG	0	0	0	1.83844	-4.6385	-0.617013	1.88253	-6.4353	-0.545572	-0.581292	yes
hsa-mir-134:ANKDD1A	hsa-mir-134	ANKDD1A	0	0	0	1.0236	-4.6385	-0.536007	1.57544	-6.4353	-0.606292	-0.571149	yes
hsa-mir-134:ANKRD29	hsa-mir-134	ANKRD29	0	0	0	1.47538	-4.6385	-0.463611	2.9484	-6.4353	-0.654459	-0.559035	yes
hsa-mir-134:ANKS1B	hsa-mir-134	ANKS1B	0	0	0	1.78846	-4.6385	-0.482484	3.22933	-6.4353	-0.697407	-0.589945	yes
hsa-mir-134:AOC3	hsa-mir-134	AOC3	0	0	0	3.79461	-4.6385	-0.642891	4.9919	-6.4353	-0.728176	-0.685534	yes
hsa-mir-134:APBB1	hsa-mir-134	APBB1	0	0	0	1.12301	-4.6385	-0.449302	1.25757	-6.4353	-0.515641	-0.482471	yes
hsa-mir-134:AR	hsa-mir-134	AR	0	0	0	2.11235	-4.6385	-0.490453	3.44237	-6.4353	-0.640067	-0.56526	yes
hsa-mir-134:ARHGAP6	hsa-mir-134	ARHGAP6	0	0	0	1.22331	-4.6385	-0.529327	1.61651	-6.4353	-0.537676	-0.533501	yes
hsa-mir-134:ARHGEF10L	hsa-mir-134	ARHGEF10L	0	0	0	1.23755	-4.6385	-0.519653	1.71862	-6.4353	-0.636099	-0.577876	yes
hsa-mir-134:ARHGEF37	hsa-mir-134	ARHGEF37	0	0	0	1.90424	-4.6385	-0.620037	3.27552	-6.4353	-0.584393	-0.602215	yes
hsa-mir-134:ARMC3	hsa-mir-134	ARMC3	0	0	0	1.27883	-4.6385	-0.495274	1.1626	-6.4353	-0.357925	-0.4266	yes
hsa-mir-134:ARTN	hsa-mir-134	ARTN	0	0	0	1.12346	-4.6385	-0.505717	2.75797	-6.4353	-0.612578	-0.559147	yes
hsa-mir-134:ASB2	hsa-mir-134	ASB2	0	0	0	5.11119	-4.6385	-0.657691	6.38015	-6.4353	-0.70948	-0.683585	yes
hsa-mir-134:ASF1B	hsa-mir-134	ASF1B	0	0	0	1.10192	-4.6385	-0.545077	1.43032	-6.4353	-0.445921	-0.495499	yes
hsa-mir-134:ATAD2	hsa-mir-134	ATAD2	0	0	0	1.0143	-4.6385	-0.504507	1.59911	-6.4353	-0.575621	-0.540064	yes
hsa-mir-134:ATP2B4	hsa-mir-134	ATP2B4	0	0	0	1.57073	-4.6385	-0.577105	2.09651	-6.4353	-0.577323	-0.577214	yes
hsa-mir-134:B3GALNT2	hsa-mir-134	B3GALNT2	0	0	0	1.41935	-4.6385	-0.565642	1.30803	-6.4353	-0.625325	-0.595483	yes
hsa-mir-134:BAG2	hsa-mir-134	BAG2	0	0	0	1.26877	-4.6385	-0.45615	1.81993	-6.4353	-0.656571	-0.55636	yes
hsa-mir-134:BARD1	hsa-mir-134	BARD1	0	0	0	1.61718	-4.6385	-0.704667	2.54886	-6.4353	-0.526587	-0.615627	yes
hsa-mir-134:BCHE	hsa-mir-134	BCHE	0	0	0	4.02857	-4.6385	-0.657799	4.18428	-6.4353	-0.509044	-0.583422	yes
hsa-mir-134:BRIP1	hsa-mir-134	BRIP1	0	0	0	1.1106	-4.6385	-0.562856	2.10854	-6.4353	-0.550027	-0.556441	yes
hsa-mir-134:BSPRY	hsa-mir-134	BSPRY	0	0	0	1.26271	-4.6385	-0.456015	4.07991	-6.4353	-0.573716	-0.514865	yes
hsa-mir-134:BTC	hsa-mir-134	BTC	0	0	0	2.06919	-4.6385	-0.639319	4.96552	-6.4353	-0.730227	-0.684773	yes
hsa-mir-134:BVES	hsa-mir-134	BVES	0	0	0	1.17849	-4.6385	-0.523425	1.5513	-6.4353	-0.581678	-0.552551	yes
hsa-mir-134:C10orf35	hsa-mir-134	C10orf35	0	0	0	1.1765	-4.6385	-0.4219	2.01585	-6.4353	-0.429944	-0.425922	yes
hsa-mir-134:C12orf54	hsa-mir-134	C12orf54	0	0	0	2.29588	-4.6385	-0.491688	3.78809	-6.4353	-0.496914	-0.494301	yes
hsa-mir-134:C14orf28	hsa-mir-134	C14orf28	0	0	0	1.39657	-4.6385	-0.501016	1.09527	-6.4353	-0.478773	-0.489895	yes
hsa-mir-134:C15orf41	hsa-mir-134	C15orf41	0	0	0	1.26887	-4.6385	-0.640938	2.08016	-6.4353	-0.709789	-0.675363	yes
hsa-mir-134:C15orf52	hsa-mir-134	C15orf52	0	0	0	2.27081	-4.6385	-0.538391	3.82044	-6.4353	-0.69692	-0.617656	yes
hsa-mir-134:C1QL1	hsa-mir-134	C1QL1	0	0	0	2.33644	-4.6385	-0.485842	3.09658	-6.4353	-0.528621	-0.507231	yes
hsa-mir-134:C3orf70	hsa-mir-134	C3orf70	0	0	0	2.95434	-4.6385	-0.596272	3.98407	-6.4353	-0.65944	-0.627856	yes
hsa-mir-134:C8orf22	hsa-mir-134	C8orf22	0	0	0	3.40709	-4.6385	-0.472926	5.64421	-6.4353	-0.508599	-0.490762	yes
hsa-mir-134:C8orf46	hsa-mir-134	C8orf46	0	0	0	1.91886	-4.6385	-0.56456	3.20543	-6.4353	-0.662633	-0.613597	yes
hsa-mir-134:CACNB2	hsa-mir-134	CACNB2	0	0	0	1.26656	-4.6385	-0.431771	3.71348	-6.4353	-0.696818	-0.564295	yes
hsa-mir-134:CAMK1	hsa-mir-134	CAMK1	0	0	0	1.07126	-4.6385	-0.5444	1.5535	-6.4353	-0.684401	-0.614401	yes
hsa-mir-134:CAND2	hsa-mir-134	CAND2	0	0	0	1.44731	-4.6385	-0.649314	2.34625	-6.4353	-0.420381	-0.534847	yes
hsa-mir-134:CAP2	hsa-mir-134	CAP2	0	0	0	2.80385	-4.6385	-0.611162	2.1386	-6.4353	-0.507702	-0.559432	yes
hsa-mir-134:CASP12	hsa-mir-134	CASP12	0	0	0	1.11894	-4.6385	-0.613383	3.26342	-6.4353	-0.689122	-0.651253	yes
hsa-mir-134:CASQ2	hsa-mir-134	CASQ2	0	0	0	5.63392	-4.6385	-0.656842	6.68191	-6.4353	-0.611861	-0.634351	yes
hsa-mir-134:CASZ1	hsa-mir-134	CASZ1	0	0	0	1.62955	-4.6385	-0.575506	3.14537	-6.4353	-0.594039	-0.584773	yes
hsa-mir-134:CBX7	hsa-mir-134	CBX7	0	0	0	1.6508	-4.6385	-0.52798	2.9876	-6.4353	-0.705599	-0.61679	yes
hsa-mir-134:CCDC107	hsa-mir-134	CCDC107	0	0	0	1.62045	-4.6385	-0.617228	1.42138	-6.4353	-0.666048	-0.641638	yes
hsa-mir-134:CCDC146	hsa-mir-134	CCDC146	0	0	0	1.46007	-4.6385	-0.530004	2.43823	-6.4353	-0.62365	-0.576827	yes
hsa-mir-134:CCDC24	hsa-mir-134	CCDC24	0	0	0	1.01986	-4.6385	-0.569293	1.6206	-6.4353	-0.564803	-0.567048	yes
hsa-mir-134:CCDC51	hsa-mir-134	CCDC51	0	0	0	1.27894	-4.6385	-0.510835	1.48876	-6.4353	-0.487419	-0.499127	yes
hsa-mir-134:CCDC81	hsa-mir-134	CCDC81	0	0	0	1.7181	-4.6385	-0.535093	4.20384	-6.4353	-0.72463	-0.629862	yes
hsa-mir-134:CCNE2	hsa-mir-134	CCNE2	0	0	0	1.24341	-4.6385	-0.524716	2.2008	-6.4353	-0.553537	-0.539126	yes
hsa-mir-134:CCR10	hsa-mir-134	CCR10	0	0	0	1.09994	-4.6385	-0.500425	1.85717	-6.4353	-0.434896	-0.46766	yes
hsa-mir-134:CD9	hsa-mir-134	CD9	0	0	0	1.86207	-4.6385	-0.519182	2.13873	-6.4353	-0.66592	-0.592551	yes
hsa-mir-134:CDC42EP3	hsa-mir-134	CDC42EP3	0	0	0	1.85477	-4.6385	-0.457412	2.06231	-6.4353	-0.55819	-0.507801	yes
hsa-mir-134:CDC42EP4	hsa-mir-134	CDC42EP4	0	0	0	1.63331	-4.6385	-0.513118	1.54052	-6.4353	-0.544972	-0.529045	yes
hsa-mir-134:CDCA7L	hsa-mir-134	CDCA7L	0	0	0	1.44829	-4.6385	-0.510487	1.26503	-6.4353	-0.370489	-0.440488	yes
hsa-mir-134:CDH3	hsa-mir-134	CDH3	0	0	0	3.21082	-4.6385	-0.573289	5.99966	-6.4353	-0.684054	-0.628672	yes
hsa-mir-134:CDK18	hsa-mir-134	CDK18	0	0	0	1.56987	-4.6385	-0.549116	2.1765	-6.4353	-0.475297	-0.512206	yes
hsa-mir-134:CDKL1	hsa-mir-134	CDKL1	0	0	0	1.46368	-4.6385	-0.58963	3.19245	-6.4353	-0.653561	-0.621596	yes
hsa-mir-134:CDKN1B	hsa-mir-134	CDKN1B	0	0	0	1.12587	-4.6385	-0.66052	1.31195	-6.4353	-0.505171	-0.582845	yes
hsa-mir-134:CDKN2C	hsa-mir-134	CDKN2C	0	0	0	1.23762	-4.6385	-0.684696	1.41605	-6.4353	-0.594993	-0.639845	yes
hsa-mir-134:CELSR2	hsa-mir-134	CELSR2	0	0	0	1.60769	-4.6385	-0.630071	2.50299	-6.4353	-0.538477	-0.584274	yes
hsa-mir-134:CFL2	hsa-mir-134	CFL2	0	0	0	2.76315	-4.6385	-0.689873	2.03675	-6.4353	-0.646641	-0.668257	yes
hsa-mir-134:CHI3L2	hsa-mir-134	CHI3L2	0	0	0	1.88277	-4.6385	-0.477342	4.10771	-6.4353	-0.636026	-0.556684	yes
hsa-mir-134:CHRDL1	hsa-mir-134	CHRDL1	0	0	0	3.27024	-4.6385	-0.423526	4.70671	-6.4353	-0.607262	-0.515394	yes
hsa-mir-134:CHRDL2	hsa-mir-134	CHRDL2	0	0	0	3.46795	-4.6385	-0.518824	7.79211	-6.4353	-0.645143	-0.581984	yes
hsa-mir-134:CITED4	hsa-mir-134	CITED4	0	0	0	1.06187	-4.6385	-0.504233	1.26697	-6.4353	-0.343578	-0.423905	yes
hsa-mir-134:CKB	hsa-mir-134	CKB	0	0	0	3.74296	-4.6385	-0.695101	3.34815	-6.4353	-0.60814	-0.65162	yes
hsa-mir-134:CKMT2	hsa-mir-134	CKMT2	0	0	0	1.71887	-4.6385	-0.57499	5.04321	-6.4353	-0.671286	-0.623138	yes
hsa-mir-134:CLSTN2	hsa-mir-134	CLSTN2	0	0	0	1.41005	-4.6385	-0.43953	2.89228	-6.4353	-0.409544	-0.424537	yes
hsa-mir-134:CLU	hsa-mir-134	CLU	0	0	0	3.55382	-4.6385	-0.562099	4.5752	-6.4353	-0.671337	-0.616718	yes
hsa-mir-134:CMTM5	hsa-mir-134	CMTM5	0	0	0	1.01994	-4.6385	-0.437745	2.86886	-6.4353	-0.580582	-0.509164	yes
hsa-mir-134:CNN1	hsa-mir-134	CNN1	0	0	0	6.31906	-4.6385	-0.631006	7.26636	-6.4353	-0.741309	-0.686158	yes
hsa-mir-134:CNR1	hsa-mir-134	CNR1	0	0	0	2.3465	-4.6385	-0.530476	4.5959	-6.4353	-0.486376	-0.508426	yes
hsa-mir-134:COL4A2	hsa-mir-134	COL4A2	0	0	0	1.17849	-4.6385	-0.544339	1.67571	-6.4353	-0.438032	-0.491186	yes
hsa-mir-134:COL4A5	hsa-mir-134	COL4A5	0	0	0	3.13468	-4.6385	-0.472892	5.03409	-6.4353	-0.633262	-0.553077	yes
hsa-mir-134:COL4A6	hsa-mir-134	COL4A6	0	0	0	2.84731	-4.6385	-0.43524	6.76493	-6.4353	-0.734224	-0.584732	yes
hsa-mir-134:CPS1	hsa-mir-134	CPS1	0	0	0	1.00722	-4.6385	-0.50381	1.32708	-6.4353	-0.34231	-0.42306	yes
hsa-mir-134:CRTAC1	hsa-mir-134	CRTAC1	0	0	0	1.68092	-4.6385	-0.4696	3.56524	-6.4353	-0.404123	-0.436861	yes
hsa-mir-134:CRYAB	hsa-mir-134	CRYAB	0	0	0	3.37894	-4.6385	-0.516773	3.81	-6.4353	-0.607552	-0.562162	yes
hsa-mir-134:CSRP1	hsa-mir-134	CSRP1	0	0	0	3.95837	-4.6385	-0.678866	4.38227	-6.4353	-0.798716	-0.738791	yes
hsa-mir-134:CTF1	hsa-mir-134	CTF1	0	0	0	1.12617	-4.6385	-0.556933	2.26307	-6.4353	-0.622265	-0.589599	yes
hsa-mir-134:CX3CL1	hsa-mir-134	CX3CL1	0	0	0	2.85414	-4.6385	-0.704775	3.24604	-6.4353	-0.612653	-0.658714	yes
hsa-mir-134:CYFIP2	hsa-mir-134	CYFIP2	0	0	0	2.35929	-4.6385	-0.571883	4.07398	-6.4353	-0.652944	-0.612413	yes
hsa-mir-134:DAAM1	hsa-mir-134	DAAM1	0	0	0	1.37998	-4.6385	-0.538393	1.52472	-6.4353	-0.433297	-0.485845	yes
hsa-mir-134:DACT3	hsa-mir-134	DACT3	0	0	0	2.81637	-4.6385	-0.606805	3.50169	-6.4353	-0.558197	-0.582501	yes
hsa-mir-134:DBNDD2	hsa-mir-134	DBNDD2	0	0	0	2.87141	-4.6385	-0.708098	3.32301	-6.4353	-0.755128	-0.731613	yes
hsa-mir-134:DCAF12L1	hsa-mir-134	DCAF12L1	0	0	0	2.02121	-4.6385	-0.526003	5.32693	-6.4353	-0.548554	-0.537278	yes
hsa-mir-134:DCST2	hsa-mir-134	DCST2	0	0	0	1.25095	-4.6385	-0.499739	3.32899	-6.4353	-0.700437	-0.600088	yes
hsa-mir-134:DDO	hsa-mir-134	DDO	0	0	0	1.17241	-4.6385	-0.501268	1.76593	-6.4353	-0.489698	-0.495483	yes
hsa-mir-134:DDR1	hsa-mir-134	DDR1	0	0	0	1.29773	-4.6385	-0.536567	1.40535	-6.4353	-0.5413	-0.538934	yes
hsa-mir-134:DES	hsa-mir-134	DES	0	0	0	6.10569	-4.6385	-0.567846	5.02957	-6.4353	-0.57007	-0.568958	yes
hsa-mir-134:DGKG	hsa-mir-134	DGKG	0	0	0	2.93347	-4.6385	-0.658386	4.7732	-6.4353	-0.799688	-0.729037	yes
hsa-mir-134:DIXDC1	hsa-mir-134	DIXDC1	0	0	0	1.57318	-4.6385	-0.442295	2.26337	-6.4353	-0.728348	-0.585321	yes
hsa-mir-134:DLG3	hsa-mir-134	DLG3	0	0	0	1.28271	-4.6385	-0.614303	1.61007	-6.4353	-0.742595	-0.678449	yes
hsa-mir-134:DMD	hsa-mir-134	DMD	0	0	0	3.57481	-4.6385	-0.561853	3.32169	-6.4353	-0.625298	-0.593575	yes
hsa-mir-134:DNAH11	hsa-mir-134	DNAH11	0	0	0	2.89638	-4.6385	-0.550662	5.23861	-6.4353	-0.699662	-0.625162	yes
hsa-mir-134:DNAJB5	hsa-mir-134	DNAJB5	0	0	0	2.04633	-4.6385	-0.642108	2.06652	-6.4353	-0.600385	-0.621247	yes
hsa-mir-134:DOCK3	hsa-mir-134	DOCK3	0	0	0	2.37575	-4.6385	-0.663384	5.2369	-6.4353	-0.801506	-0.732445	yes
hsa-mir-134:DSTN	hsa-mir-134	DSTN	0	0	0	2.23571	-4.6385	-0.652984	2.35155	-6.4353	-0.696523	-0.674754	yes
hsa-mir-134:DTNA	hsa-mir-134	DTNA	0	0	0	2.86556	-4.6385	-0.675584	3.90025	-6.4353	-0.758944	-0.717264	yes
hsa-mir-134:DUSP19	hsa-mir-134	DUSP19	0	0	0	1.30293	-4.6385	-0.516575	2.10784	-6.4353	-0.594741	-0.555658	yes
hsa-mir-134:DUSP3	hsa-mir-134	DUSP3	0	0	0	1.15271	-4.6385	-0.568347	1.34973	-6.4353	-0.651377	-0.609862	yes
hsa-mir-134:EGF	hsa-mir-134	EGF	0	0	0	1.37111	-4.6385	-0.448347	2.62842	-6.4353	-0.384506	-0.416427	yes
hsa-mir-134:EHBP1L1	hsa-mir-134	EHBP1L1	0	0	0	1.38964	-4.6385	-0.543817	1.31297	-6.4353	-0.617993	-0.580905	yes
hsa-mir-134:EMILIN3	hsa-mir-134	EMILIN3	0	0	0	1.14476	-4.6385	-0.461971	3.3643	-6.4353	-0.421886	-0.441929	yes
hsa-mir-134:EMP2	hsa-mir-134	EMP2	0	0	0	1.13017	-4.6385	-0.534937	1.50151	-6.4353	-0.524736	-0.529836	yes
hsa-mir-134:ENAM	hsa-mir-134	ENAM	0	0	0	1.06542	-4.6385	-0.561534	4.93885	-6.4353	-0.705195	-0.633365	yes
hsa-mir-134:ENO2	hsa-mir-134	ENO2	0	0	0	1.14747	-4.6385	-0.423699	1.75473	-6.4353	-0.553298	-0.488499	yes
hsa-mir-134:EPHB6	hsa-mir-134	EPHB6	0	0	0	1.20043	-4.6385	-0.502474	2.94138	-6.4353	-0.480793	-0.491634	yes
hsa-mir-134:EPHX2	hsa-mir-134	EPHX2	0	0	0	2.01584	-4.6385	-0.484165	3.42457	-6.4353	-0.58087	-0.532517	yes
hsa-mir-134:EPM2A	hsa-mir-134	EPM2A	0	0	0	1.4599	-4.6385	-0.562353	1.61728	-6.4353	-0.515992	-0.539173	yes
hsa-mir-134:EPN2	hsa-mir-134	EPN2	0	0	0	1.22892	-4.6385	-0.463129	1.57834	-6.4353	-0.463956	-0.463543	yes
hsa-mir-134:ESYT2	hsa-mir-134	ESYT2	0	0	0	1.10105	-4.6385	-0.448923	1.06343	-6.4353	-0.38297	-0.415946	yes
hsa-mir-134:ETS2	hsa-mir-134	ETS2	0	0	0	1.01104	-4.6385	-0.537174	1.28153	-6.4353	-0.544205	-0.540689	yes
hsa-mir-134:EXOC6	hsa-mir-134	EXOC6	0	0	0	1.00609	-4.6385	-0.576857	1.16135	-6.4353	-0.546145	-0.561501	yes
hsa-mir-134:FABP3	hsa-mir-134	FABP3	0	0	0	1.42703	-4.6385	-0.532325	2.09936	-6.4353	-0.453383	-0.492854	yes
hsa-mir-134:FAM111B	hsa-mir-134	FAM111B	0	0	0	1.56099	-4.6385	-0.714717	2.14936	-6.4353	-0.610549	-0.662633	yes
hsa-mir-134:FAM129A	hsa-mir-134	FAM129A	0	0	0	2.75693	-4.6385	-0.742108	3.76197	-6.4353	-0.742211	-0.74216	yes
hsa-mir-134:FAM131A	hsa-mir-134	FAM131A	0	0	0	1.32405	-4.6385	-0.55594	1.46362	-6.4353	-0.640605	-0.598272	yes
hsa-mir-134:FAM13C	hsa-mir-134	FAM13C	0	0	0	1.38277	-4.6385	-0.435306	1.96909	-6.4353	-0.536576	-0.485941	yes
hsa-mir-134:FAM184A	hsa-mir-134	FAM184A	0	0	0	2.76162	-4.6385	-0.615171	5.30632	-6.4353	-0.732786	-0.673979	yes
hsa-mir-134:FAM46B	hsa-mir-134	FAM46B	0	0	0	2.3901	-4.6385	-0.499126	3.86896	-6.4353	-0.567934	-0.53353	yes
hsa-mir-134:FAM46C	hsa-mir-134	FAM46C	0	0	0	1.62117	-4.6385	-0.564105	2.63672	-6.4353	-0.501839	-0.532972	yes
hsa-mir-134:FANCE	hsa-mir-134	FANCE	0	0	0	1.02196	-4.6385	-0.642109	1.54449	-6.4353	-0.638556	-0.640332	yes
hsa-mir-134:FAT3	hsa-mir-134	FAT3	0	0	0	2.03938	-4.6385	-0.478428	3.31459	-6.4353	-0.527034	-0.502731	yes
hsa-mir-134:FBXL22	hsa-mir-134	FBXL22	0	0	0	3.67056	-4.6385	-0.62694	5.41805	-6.4353	-0.690498	-0.658719	yes
hsa-mir-134:FBXO32	hsa-mir-134	FBXO32	0	0	0	2.78527	-4.6385	-0.608754	2.75522	-6.4353	-0.636527	-0.62264	yes
hsa-mir-134:FCRLA	hsa-mir-134	FCRLA	0	0	0	1.15578	-4.6385	-0.561068	3.26453	-6.4353	-0.504692	-0.53288	yes
hsa-mir-134:FEM1B	hsa-mir-134	FEM1B	0	0	0	1.0278	-4.6385	-0.504286	1.65142	-6.4353	-0.592461	-0.548374	yes
hsa-mir-134:FERMT2	hsa-mir-134	FERMT2	0	0	0	1.53198	-4.6385	-0.626987	1.41549	-6.4353	-0.450644	-0.538816	yes
hsa-mir-134:FGF13	hsa-mir-134	FGF13	0	0	0	2.3321	-4.6385	-0.50949	4.43938	-6.4353	-0.690911	-0.6002	yes
hsa-mir-134:FGF7	hsa-mir-134	FGF7	0	0	0	2.20089	-4.6385	-0.558986	4.3507	-6.4353	-0.535738	-0.547362	yes
hsa-mir-134:FHL1	hsa-mir-134	FHL1	0	0	0	2.79018	-4.6385	-0.571984	3.06593	-6.4353	-0.489732	-0.530858	yes
hsa-mir-134:FIGN	hsa-mir-134	FIGN	0	0	0	1.02909	-4.6385	-0.466395	1.68705	-6.4353	-0.507835	-0.487115	yes
hsa-mir-134:FILIP1	hsa-mir-134	FILIP1	0	0	0	1.87945	-4.6385	-0.515534	3.16656	-6.4353	-0.637775	-0.576655	yes
hsa-mir-134:FLNA	hsa-mir-134	FLNA	0	0	0	1.77012	-4.6385	-0.555211	2.59069	-6.4353	-0.762126	-0.658669	yes
hsa-mir-134:FMO5	hsa-mir-134	FMO5	0	0	0	1.3293	-4.6385	-0.471264	2.989	-6.4353	-0.719189	-0.595227	yes
hsa-mir-134:FNBP1	hsa-mir-134	FNBP1	0	0	0	1.35777	-4.6385	-0.505627	1.76871	-6.4353	-0.676818	-0.591222	yes
hsa-mir-134:FOXF1	hsa-mir-134	FOXF1	0	0	0	1.88749	-4.6385	-0.525633	3.5512	-6.4353	-0.346971	-0.436302	yes
hsa-mir-134:FOXN3	hsa-mir-134	FOXN3	0	0	0	1.03316	-4.6385	-0.494964	1.41269	-6.4353	-0.541969	-0.518466	yes
hsa-mir-134:FRY	hsa-mir-134	FRY	0	0	0	3.10632	-4.6385	-0.670919	3.73265	-6.4353	-0.598387	-0.634653	yes
hsa-mir-134:FXYD1	hsa-mir-134	FXYD1	0	0	0	3.57261	-4.6385	-0.613856	3.36165	-6.4353	-0.394387	-0.504121	yes
hsa-mir-134:FYCO1	hsa-mir-134	FYCO1	0	0	0	1.85567	-4.6385	-0.575224	2.27998	-6.4353	-0.542342	-0.558783	yes
hsa-mir-134:GADD45G	hsa-mir-134	GADD45G	0	0	0	1.50701	-4.6385	-0.468042	2.80499	-6.4353	-0.635319	-0.551681	yes
hsa-mir-134:GBP2	hsa-mir-134	GBP2	0	0	0	1.33897	-4.6385	-0.574534	1.62269	-6.4353	-0.529706	-0.55212	yes
hsa-mir-134:GCHFR	hsa-mir-134	GCHFR	0	0	0	1.31947	-4.6385	-0.528787	1.47698	-6.4353	-0.385166	-0.456976	yes
hsa-mir-134:GIPC3	hsa-mir-134	GIPC3	0	0	0	2.79751	-4.6385	-0.601804	3.72589	-6.4353	-0.679391	-0.640597	yes
hsa-mir-134:GKAP1	hsa-mir-134	GKAP1	0	0	0	1.75385	-4.6385	-0.663485	3.03784	-6.4353	-0.693113	-0.678299	yes
hsa-mir-134:GNA11	hsa-mir-134	GNA11	0	0	0	1.09078	-4.6385	-0.487916	1.68982	-6.4353	-0.534029	-0.510972	yes
hsa-mir-134:GNAO1	hsa-mir-134	GNAO1	0	0	0	2.68704	-4.6385	-0.619777	5.08347	-6.4353	-0.589524	-0.604651	yes
hsa-mir-134:GNAZ	hsa-mir-134	GNAZ	0	0	0	2.21117	-4.6385	-0.50299	3.39519	-6.4353	-0.655701	-0.579345	yes
hsa-mir-134:GPD1L	hsa-mir-134	GPD1L	0	0	0	1.66429	-4.6385	-0.66302	1.7473	-6.4353	-0.64856	-0.65579	yes
hsa-mir-134:GPR17	hsa-mir-134	GPR17	0	0	0	1.84378	-4.6385	-0.480354	3.21385	-6.4353	-0.567629	-0.523992	yes
hsa-mir-134:GPR21	hsa-mir-134	GPR21	0	0	0	1.59904	-4.6385	-0.567674	4.37703	-6.4353	-0.622015	-0.594844	yes
hsa-mir-134:GRIK5	hsa-mir-134	GRIK5	0	0	0	2.4388	-4.6385	-0.666715	6.21105	-6.4353	-0.781335	-0.724025	yes
hsa-mir-134:GSN	hsa-mir-134	GSN	0	0	0	1.72732	-4.6385	-0.520613	2.09157	-6.4353	-0.695481	-0.608047	yes
hsa-mir-134:GYG1	hsa-mir-134	GYG1	0	0	0	1.11725	-4.6385	-0.684016	1.30808	-6.4353	-0.615451	-0.649734	yes
hsa-mir-134:HADH	hsa-mir-134	HADH	0	0	0	1.20719	-4.6385	-0.657923	1.43436	-6.4353	-0.621245	-0.639584	yes
hsa-mir-134:HEY2	hsa-mir-134	HEY2	0	0	0	1.77781	-4.6385	-0.498447	3.15361	-6.4353	-0.516271	-0.507359	yes
hsa-mir-134:HOPX	hsa-mir-134	HOPX	0	0	0	2.12778	-4.6385	-0.442285	2.6679	-6.4353	-0.612445	-0.527365	yes
hsa-mir-134:HPD	hsa-mir-134	HPD	0	0	0	1.77678	-4.6385	-0.533456	5.51277	-6.4353	-0.680326	-0.606891	yes
hsa-mir-134:HRCT1	hsa-mir-134	HRCT1	0	0	0	1.59823	-4.6385	-0.512151	2.56685	-6.4353	-0.468948	-0.490549	yes
hsa-mir-134:HSPA2	hsa-mir-134	HSPA2	0	0	0	2.80833	-4.6385	-0.539136	2.91782	-6.4353	-0.39691	-0.468023	yes
hsa-mir-134:HSPA4L	hsa-mir-134	HSPA4L	0	0	0	1.93726	-4.6385	-0.693076	2.64427	-6.4353	-0.563034	-0.628055	yes
hsa-mir-134:HSPB2	hsa-mir-134	HSPB2	0	0	0	2.12144	-4.6385	-0.514529	2.49439	-6.4353	-0.546995	-0.530762	yes
hsa-mir-134:HSPB3	hsa-mir-134	HSPB3	0	0	0	3.1213	-4.6385	-0.445734	3.68807	-6.4353	-0.559086	-0.50241	yes
hsa-mir-134:HSPB6	hsa-mir-134	HSPB6	0	0	0	1.90243	-4.6385	-0.533703	2.98093	-6.4353	-0.441918	-0.487811	yes
hsa-mir-134:HSPB7	hsa-mir-134	HSPB7	0	0	0	2.6378	-4.6385	-0.449988	2.64583	-6.4353	-0.420683	-0.435335	yes
hsa-mir-134:HSPB8	hsa-mir-134	HSPB8	0	0	0	4.17121	-4.6385	-0.592813	3.89435	-6.4353	-0.629613	-0.611213	yes
hsa-mir-134:IFT81	hsa-mir-134	IFT81	0	0	0	1.0771	-4.6385	-0.629136	1.22293	-6.4353	-0.517983	-0.57356	yes
hsa-mir-134:IGFBPL1	hsa-mir-134	IGFBPL1	0	0	0	2.82994	-4.6385	-0.627239	3.83986	-6.4353	-0.525597	-0.576418	yes
hsa-mir-134:IGSF9B	hsa-mir-134	IGSF9B	0	0	0	3.18688	-4.6385	-0.693109	5.44172	-6.4353	-0.64246	-0.667784	yes
hsa-mir-134:IL17B	hsa-mir-134	IL17B	0	0	0	3.84892	-4.6385	-0.637125	5.70249	-6.4353	-0.60777	-0.622447	yes
hsa-mir-134:IL33	hsa-mir-134	IL33	0	0	0	2.9397	-4.6385	-0.493748	4.73026	-6.4353	-0.630539	-0.562144	yes
hsa-mir-134:IL6R	hsa-mir-134	IL6R	0	0	0	1.08266	-4.6385	-0.549239	2.30388	-6.4353	-0.588125	-0.568682	yes
hsa-mir-134:ILK	hsa-mir-134	ILK	0	0	0	1.67372	-4.6385	-0.570689	1.27899	-6.4353	-0.579514	-0.575102	yes
hsa-mir-134:IMPA2	hsa-mir-134	IMPA2	0	0	0	1.20436	-4.6385	-0.439347	1.30189	-6.4353	-0.461077	-0.450212	yes
hsa-mir-134:INPP5J	hsa-mir-134	INPP5J	0	0	0	1.14193	-4.6385	-0.586241	3.84205	-6.4353	-0.711002	-0.648622	yes
hsa-mir-134:IRF6	hsa-mir-134	IRF6	0	0	0	1.87699	-4.6385	-0.564024	5.45863	-6.4353	-0.703485	-0.633754	yes
hsa-mir-134:ISOC1	hsa-mir-134	ISOC1	0	0	0	1.39378	-4.6385	-0.588571	1.70431	-6.4353	-0.438441	-0.513506	yes
hsa-mir-134:ISYNA1	hsa-mir-134	ISYNA1	0	0	0	1.54577	-4.6385	-0.528819	2.0116	-6.4353	-0.357697	-0.443258	yes
hsa-mir-134:ITGA1	hsa-mir-134	ITGA1	0	0	0	1.43251	-4.6385	-0.566225	2.29954	-6.4353	-0.630922	-0.598574	yes
hsa-mir-134:ITGA3	hsa-mir-134	ITGA3	0	0	0	1.58749	-4.6385	-0.516606	1.16007	-6.4353	-0.412726	-0.464666	yes
hsa-mir-134:ITGA7	hsa-mir-134	ITGA7	0	0	0	3.72879	-4.6385	-0.662299	3.81952	-6.4353	-0.712774	-0.687536	yes
hsa-mir-134:ITGA8	hsa-mir-134	ITGA8	0	0	0	3.50095	-4.6385	-0.500675	4.98276	-6.4353	-0.643327	-0.572001	yes
hsa-mir-134:ITGB1BP2	hsa-mir-134	ITGB1BP2	0	0	0	2.20354	-4.6385	-0.448943	3.6054	-6.4353	-0.555202	-0.502073	yes
hsa-mir-134:ITPR1	hsa-mir-134	ITPR1	0	0	0	2.47087	-4.6385	-0.615417	3.03312	-6.4353	-0.727883	-0.67165	yes
hsa-mir-134:JPH2	hsa-mir-134	JPH2	0	0	0	5.17164	-4.6385	-0.660653	5.3085	-6.4353	-0.73707	-0.698862	yes
hsa-mir-134:KALRN	hsa-mir-134	KALRN	0	0	0	1.44376	-4.6385	-0.566043	2.018	-6.4353	-0.466701	-0.516372	yes
hsa-mir-134:KANK1	hsa-mir-134	KANK1	0	0	0	2.32102	-4.6385	-0.521145	2.96729	-6.4353	-0.646385	-0.583765	yes
hsa-mir-134:KANK2	hsa-mir-134	KANK2	0	0	0	1.49202	-4.6385	-0.597367	2.4367	-6.4353	-0.630281	-0.613824	yes
hsa-mir-134:KBTBD12	hsa-mir-134	KBTBD12	0	0	0	1.10998	-4.6385	-0.547863	4.59271	-6.4353	-0.592111	-0.569987	yes
hsa-mir-134:KCND3	hsa-mir-134	KCND3	0	0	0	2.95262	-4.6385	-0.487666	4.6143	-6.4353	-0.645446	-0.566556	yes
hsa-mir-134:KCNE4	hsa-mir-134	KCNE4	0	0	0	1.45372	-4.6385	-0.483599	1.88091	-6.4353	-0.471808	-0.477703	yes
hsa-mir-134:KCNH2	hsa-mir-134	KCNH2	0	0	0	4.02049	-4.6385	-0.663583	6.66594	-6.4353	-0.732911	-0.698247	yes
hsa-mir-134:KCNK3	hsa-mir-134	KCNK3	0	0	0	1.68946	-4.6385	-0.442784	4.99029	-6.4353	-0.580995	-0.511889	yes
hsa-mir-134:KCNMA1	hsa-mir-134	KCNMA1	0	0	0	2.0818	-4.6385	-0.430473	2.30174	-6.4353	-0.527536	-0.479004	yes
hsa-mir-134:KCNMB1	hsa-mir-134	KCNMB1	0	0	0	4.72051	-4.6385	-0.687082	6.80636	-6.4353	-0.73832	-0.712701	yes
hsa-mir-134:KCNQ4	hsa-mir-134	KCNQ4	0	0	0	2.21958	-4.6385	-0.580671	4.70072	-6.4353	-0.785914	-0.683292	yes
hsa-mir-134:KHK	hsa-mir-134	KHK	0	0	0	1.35019	-4.6385	-0.453452	2.40141	-6.4353	-0.671376	-0.562414	yes
hsa-mir-134:KIAA0408	hsa-mir-134	KIAA0408	0	0	0	1.54873	-4.6385	-0.441097	4.49338	-6.4353	-0.600949	-0.521023	yes
[truncated: 14,422 more rows]
