# Supplementary material for: Distinct Cellular Origins and Differentiation Process Account for Distinct Oncogenic and Clinical Behaviors of Leiomyosarcomas
Source: Cancers (Basel). 2023 Jan 15;15(2):534. doi: 10.3390/cancers15020534 (PMC9856933; doi:10.3390/cancers15020534)
Supplement: Supplementary file 1 [file cancers-15-00534-s001.zip › TS_5.xlsx]

## Sheet: TS5A - cytoband
Supplementary Table S5A: Enrichment of cytoband copy number variantion recurrence in hLMS and oLMS in merged cohort.
Column description: cytogenic band, number of genes present in the region, % altered samples (median): median percentage of altered samples accross genes in the region with deletion, loss, gain or amplification in all LMS, hLMS and oLMS; Fisher's Exact test: indicates for hLMS and oLMS if the region contains a significant (p-value adjusted < 0.01) number of lost, gained, deleted or amplified gene…
cytogenic band	number of genes	% altered samples (median)												Fisher's Exact test				gene expression
		deletion			loss			gain			amplification			hLMS		oLMS		GSEA	median	Q25:Q75
		hLMS	oLMS	all	hLMS	oLMS	all	hLMS	oLMS	all	hLMS	oLMS	all	alter	% genes	alter	% genes
chr1p36	338	0	0	0	0.425926	0.111111	0.276799	0.0972222	0.394737	0.256497	0	0	0	loss	0.677515	gain	0.97929	neg	-1.49	-3.47 : -0.06
chr1p35	75	0	0	0	0.100917	0.137931	0.117577	0.180556	0.448276	0.314416	0.00917431	0	0.00458716			gain	0.573333		-0.33	-2.43 : 1.82
chr1p34	160	0	0	0	0.0555556	0.137931	0.0967433	0.222222	0.413793	0.311063	0.0138889	0	0.00694444						0.1	-1.64 : 1.78
chr1p33	26	0	0	0	0.0772965	0.136533	0.105381	0.149533	0.355263	0.253473	0.00970874	0	0.00694444			gain	0.961538		-0.26	-0.8 : 0.86
chr1p32	63	0	0	0	0.0555556	0.103448	0.0795019	0.180556	0.481481	0.324713	0.0138889	0.0689655	0.0414272			gain	0.857143		-0.07	-1.71 : 1.08
chr1p31	76	0	0	0	0.0555556	0.103448	0.0795019	0.180556	0.448276	0.314416	0.0277778	0.0689655	0.0483716			gain	0.644737		0.45	-1.43 : 3.04
chr1p22	60	0	0	0	0.0717593	0.137931	0.110501	0.166667	0.412376	0.281609	0.0138889	0.0689655	0.0414272			gain	0.583333		-0.7	-1.77 : 0.84
chr1p21	30	0	0	0	0.0972222	0.206897	0.152059	0.151861	0.345747	0.248803	0.0138889	0.0344828	0.0241858			gain	0.533333		-0.67	-1.97 : 1.54
chr1p13	111	0	0	0	0.111111	0.206897	0.159004	0.142857	0.285714	0.21432	0	0	0						0.16	-1.59 : 2.24
chr1p12	15	0	0	0	0.0972222	0.166667	0.134818	0.138889	0.321429	0.231561	0	0.028169	0.0140845						-0.99	-2.09 : -0.19
chr1p11	2	0	0	0	0.0857143	0.111111	0.0984127	0.257143	0.481481	0.369312	0	0	0						-2.99	-3.45 : -2.53
chr1q21	193	0	0	0	0.0138889	0	0.00694444	0.25	0.517241	0.383621	0.0138889	0	0.00694444			gain	0.321244		-0.6	-1.67 : 1.18
chr1q22	49	0	0	0	0.0138889	0	0.00694444	0.305556	0.551724	0.42864	0	0	0						-0.84	-2.34 : 0.91
chr1q23	130	0	0	0	0.0138889	0.0344828	0.0241858	0.25	0.428571	0.345785	0	0.0131579	0.00657895			gain	0.376924		-1.04	-2.02 : 0.46
chr1q24	56	0	0	0	0.0138889	0.0529825	0.0312538	0.277778	0.448276	0.363027	0	0	0						-0.54	-1.73 : 0.56
chr1q25	72	0	0	0	0.0416667	0.0789474	0.0622605	0.277778	0.241379	0.246032	0.0138889	0	0.00694444						0.01	-2.1 : 1.92
chr1q31	32	0	0	0	0.0651177	0.172414	0.120929	0.222222	0.171733	0.189381	0	0	0						-0.77	-1.99 : 1.05
chr1q32	138	0	0	0	0.0694444	0.24	0.15107	0.271916	0.172414	0.218333	0	0	0			loss	0.333333	pos	0.83	-1.27 : 2.66
chr1q41	33	0	0	0	0.0694444	0.241379	0.155901	0.236111	0.103448	0.176724	0	0	0			loss	0.393939		0.83	-0.58 : 2.21
chr1q42	83	0	0	0	0.0972222	0.275862	0.186542	0.25	0.103448	0.176724	0	0	0			loss	0.144578		1.09	-0.97 : 2.94
chr1q43	22	0	0.0344828	0.0172414	0.10628	0.241379	0.17527	0.227053	0.103448	0.162835	0	0	0			loss	0.363636		1.04	-0.46 : 3.05
chr1q44	66	0	0	0	0.152778	0.172414	0.159613	0.236111	0.137931	0.187021	0	0	0						-0.88	-1.58 : 0.54
chr2p25	44	0	0	0	0.451923	0.283784	0.366879	0.0384615	0.100335	0.0668114	0.00961538	0	0.00480769						-1.2	-2.47 : -0.46
chr2p24	26	0	0	0	0.480769	0.27027	0.370712	0.0192308	0.0945946	0.0617204	0	0	0	loss	1				-0.17	-2.32 : 2.61
chr2p23	83	0	0	0	0.490385	0.27027	0.376085	0.0192308	0.0945946	0.0569127	0	0	0	loss	1				-1.59	-3.02 : 0.62
chr2p22	39	0	0	0	0.5	0.256757	0.375951	0.0192308	0.0810811	0.0507113	0	0	0	loss	1				-1.53	-2.81 : 1.23
chr2p21	36	0	0	0	0.5	0.256757	0.374761	0.00966206	0.0810811	0.0453482	0	0	0	loss	0.972222				-0.73	-2.15 : 1.03
chr2p16	36	0	0	0	0.490385	0.268468	0.37552	0.00961538	0.0810811	0.0449223	0	0	0	loss	0.888889				0.37	-1.88 : 1.49
chr2p15	13	0	0	0	0.471154	0.27027	0.370712	0.0138889	0.0689655	0.0433992	0	0	0						-0.4	-1.43 : 0.27
chr2p14	18	0	0	0	0.466346	0.288559	0.37461	0.00961538	0.0675676	0.0385915	0	0	0						-1.65	-2.7 : 1.69
chr2p13	82	0	0	0	0.451923	0.27027	0.361097	0.0105263	0.0675676	0.0433992	0	0	0						-0.82	-2.72 : 0.67
chr2p12	13	0	0	0	0.428571	0.246575	0.337573	0.0288462	0.0810811	0.0549636	0.0138889	0	0.00694444						-0.97	-1.5 : 0.77
chr2p11	41	0	0	0	0.201923	0.226667	0.214295	0.0961538	0.0666667	0.0814103	0.0673077	0.0133333	0.0403205						-0.41	-1.68 : 1.28
chr2q11	70	0	0	0	0.129815	0.173333	0.155702	0.0972222	0.146667	0.119808	0.00961538	0	0.00480769						-0.3	-1.24 : 1.81
chr2q12	29	0	0	0	0.164835	0.186667	0.175064	0.0776699	0.12	0.0987768	0.00961538	0	0.00480769						-1.17	-1.73 : 1.05
chr2q13	32	0	0	0	0.173077	0.187928	0.17908	0.0772965	0.12	0.097896	0.00961538	0	0.00480769						-0.6	-1.47 : 0.53
chr2q14	42	0	0	0	0.168619	0.2	0.186538	0.0714195	0.106667	0.0918931	0.00961538	0	0.00480769						-0.68	-2.94 : 0.6
chr2q21	38	0	0	0	0.166667	0.154074	0.159304	0.0833333	0.172414	0.13866	0.0138889	0	0.00694444						-0.08	-0.9 : 1.33
chr2q22	12	0	0	0	0.171663	0.279823	0.225156	0.0833333	0.122537	0.103229	0.0138889	0	0.00704225						0.11	-1.47 : 1.95
chr2q23	20	0	0	0	0.180556	0.241379	0.210967	0.0833333	0.137931	0.110632	0.0138889	0	0.00694444						0.12	-0.81 : 1.89
chr2q24	47	0	0	0	0.180556	0.310345	0.246154	0.0694444	0.0958904	0.0787037	0.0138889	0	0.00694444			loss	0.212766		0.57	-1.5 : 3
chr2q31	75	0	0	0	0.190476	0.310345	0.252395	0.0694444	0.0689655	0.069205	0.0138889	0	0.00694444			loss	0.253333		0.71	-1.02 : 2.59
chr2q32	41	0	0	0	0.194444	0.366197	0.278846	0.0694444	0.103448	0.0864464	0	0	0			loss	0.365854		-0.08	-1.77 : 2.21
chr2q33	71	0	0	0	0.208333	0.413793	0.311015	0.0555556	0.0689655	0.0622605	0	0	0			loss	0.323944		0.23	-1.72 : 1.72
chr2q34	18	0.0138889	0	0.00694444	0.222222	0.413793	0.318008	0.0555556	0.0392857	0.0450192	0	0	0			loss	0.388889		1.21	-0.33 : 3.6
chr2q35	64	0.0138889	0	0.00694444	0.25	0.385811	0.321388	0.0694444	0.0689655	0.0694495	0	0	0						-0.09	-1.37 : 1.08
chr2q36	34	0.0138889	0	0.00694444	0.248853	0.413793	0.331897	0.0555556	0.103448	0.0795019	0	0	0						-0.44	-1.62 : 0.82
chr2q37	107	0.0277778	0	0.0138889	0.263889	0.413793	0.324952	0.0555556	0.0533333	0.0567196	0	0	0						-0.27	-1.33 : 1.17
chr3p26	16	0	0	0	0.0416667	0.172414	0.10704	0.193552	0.237128	0.217912	0.0277778	0.0241858	0.0259342						0.37	-2.13 : 3.31
chr3p25	75	0	0	0	0.0277778	0.172414	0.100096	0.183486	0.241379	0.212239	0.0277778	0	0.0138889						-0.21	-1.31 : 1.65
chr3p24	30	0	0	0	0.0153396	0.172414	0.0943192	0.174501	0.206897	0.189104	0.0277778	0	0.0138889						-0.01	-0.8 : 1.39
chr3p23	3	0	0	0	0.0185185	0.157143	0.0878307	0.169014	0.2	0.192593	0.0194175	0	0.00970874						6.3	2.95 : 6.32
chr3p22	78	0	0	0	0.0277778	0.206897	0.117337	0.19431	0.241379	0.210967	0.0277778	0	0.0138889						0.96	-1.02 : 2.73
chr3p21	190	0	0.0344828	0.0172414	0.0277778	0.226667	0.127756	0.236111	0.241379	0.233366	0.0139867	0	0.00704225						0.7	-0.85 : 2.25
chr3p14	50	0	0.0344828	0.0172414	0.0339736	0.206897	0.124282	0.194444	0.206897	0.194362	0.00970874	0	0.00485437						1.34	-0.3 : 2.42
chr3p13	10	0	0.0323929	0.0161964	0.0555556	0.172414	0.113985	0.17439	0.146813	0.165696	0	0	0						-0.5	-1.28 : 2.11
chr3p12	7	0	0.0142857	0.011657	0.056338	0.164384	0.10997	0.148148	0.123288	0.140348	0.00934579	0	0.00480769						-0.33	-1.12 : 2.7
chr3p11	7	0	0	0	0.0416667	0.206897	0.124282	0.138889	0.172414	0.155651	0.0138889	0.0714286	0.0426587						-0.91	-2.53 : 0.27
chr3q11	20	0	0	0	0.0555556	0.137931	0.0967433	0.166667	0.172414	0.16954	0	0	0						-0.29	-0.71 : 1.73
chr3q12	21	0	0	0	0.0555556	0.137931	0.0967433	0.180556	0.137931	0.159243	0	0	0						2.16	0.47 : 4.25
chr3q13	79	0	0	0	0.0416667	0.137931	0.0897988	0.183486	0.103448	0.148946	0.0277778	0	0.0138889						-0.01	-1.29 : 2.05
chr3q21	63	0	0	0	0.0416667	0.137931	0.0897988	0.254902	0.172414	0.197537	0.0138889	0	0.00694444	gain	0.111111				0.77	-1.77 : 2.85
chr3q22	55	0	0	0	0.0555556	0.172414	0.113985	0.207921	0.137931	0.168966	0	0	0						0.54	-0.75 : 2.16
chr3q23	26	0	0	0	0.0511423	0.136986	0.0884053	0.218254	0.206897	0.207615	0	0	0						0.37	-0.71 : 1.52
chr3q24	16	0	0	0	0.0555556	0.137931	0.0957404	0.194444	0.172414	0.183429	0	0	0						-0.32	-1.3 : 2.09
chr3q25	59	0	0	0	0.0555556	0.172414	0.113985	0.194175	0.142857	0.16954	0	0	0						-0.06	-1.12 : 1.75
chr3q26	61	0	0	0	0.0555556	0.189189	0.12037	0.196262	0.16	0.173132	0	0.0133333	0.00666666						-0.08	-1.14 : 0.79
chr3q27	60	0.00930253	0	0.00469494	0.0833333	0.178327	0.134818	0.217235	0.172414	0.190374	0	0.0344828	0.0172414						-0.17	-1.71 : 2.32
chr3q28	12	0	0	0	0.0972222	0.172414	0.134818	0.180556	0.189655	0.181011	0	0	0						0.64	-0.72 : 2.09
chr3q29	45	0.0138889	0	0.00694444	0.0985915	0.206897	0.152744	0.2	0.172414	0.179563	0	0	0						-0.75	-1.9 : 1.31
chr4p16	103	0	0	0	0.194444	0.142857	0.173132	0.205882	0.37931	0.293822	0.0138889	0.0344828	0.0241858						-1.25	-2.72 : 0.71
chr4p15	44	0	0	0	0.166667	0.137931	0.152299	0.194444	0.253378	0.223539	0	0.0344828	0.0211435						-0.37	-1.81 : 1.4
chr4p14	29	0	0	0	0.150943	0.137931	0.145354	0.180556	0.37931	0.279933	0	0	0						-0.8	-1.92 : 1.26
chr4p13	11	0	0	0	0.138889	0.206897	0.172893	0.180556	0.275862	0.228209	0	0	0						0.18	-1.56 : 1.79
chr4p12	16	0	0	0	0.125	0.137931	0.131466	0.152778	0.310345	0.223944	0	0	0						-1.2	-2.17 : -0.39
chr4p11	7	0.0138889	0	0.00694444	0.125	0.0689655	0.0969828	0.152778	0.310345	0.231561	0	0.0689655	0.0344828						-0.53	-1.02 : 0.94
chr4q12	33	0.0138889	0	0.00694444	0.0972222	0.0789474	0.100335	0.152778	0.342105	0.24545	0.00970874	0.0689655	0.0414272			gain	0.545455		-1.5	-3.94 : 2.03
chr4q13	68	0.0138889	0	0.00694444	0.138889	0.241379	0.186662	0.0972222	0.103448	0.102183	0	0.0689655	0.0344828						-0.75	-1.51 : 0.39
chr4q21	57	0.0138889	0	0.00694444	0.125	0.206897	0.165948	0.111111	0.137931	0.124521	0	0.0689655	0.0344828						-0.42	-1.87 : 0.64
chr4q22	33	0.0138889	0	0.00694444	0.140845	0.241379	0.190134	0.111111	0.133333	0.114224	0	0.0294118	0.0147059						0.15	-0.79 : 1.46
chr4q23	17	0.0138889	0	0.00694444	0.152778	0.310345	0.231561	0.111111	0.137931	0.124521	0	0	0						1.2	-0.5 : 2.81
chr4q24	24	0.0138889	0	0.00694444	0.152778	0.275862	0.21432	0.111111	0.136533	0.111801	0	0	0						-0.36	-1.56 : 0.64
chr4q25	27	0.0138889	0	0.00694444	0.152778	0.275862	0.21432	0.111111	0.146667	0.124521	0	0	0						0.49	-2.31 : 2.47
chr4q26	15	0.0138889	0	0.00694444	0.166667	0.275862	0.221264	0.111111	0.137931	0.11204	0	0	0						0.93	-1.48 : 2.66
chr4q27	17	0.00934579	0	0.0046729	0.174312	0.205479	0.189896	0.0917431	0.150685	0.124819	0	0	0						-1.13	-1.85 : 1.62
chr4q28	18	0.0138889	0	0.00694444	0.16784	0.275862	0.221264	0.100013	0.158947	0.125061	0	0	0						1.14	-0.12 : 1.81
chr4q31	62	0	0	0	0.19431	0.241379	0.217885	0.0972222	0.273066	0.177733	0.0138889	0	0.00694444			gain	0.435484		-0.5	-2.1 : 1.5
chr4q32	39	0	0	0	0.183099	0.310345	0.24545	0.0972222	0.206897	0.159004	0	0	0.00694444						-0.54	-1.67 : 1.32
chr4q33	4	0	0.0172414	0.00862069	0.194444	0.277256	0.237698	0.111111	0.1867	0.149444	0	0.0239981	0.0119991						-2.79	-4.34 : -0.85
chr4q34	20	0	0.0344828	0.0172414	0.194444	0.344828	0.269636	0.111111	0.206897	0.159004	0	0.0344828	0.0172414						2.1	-0.48 : 3.83
chr4q35	34	0	0.0210893	0.0105446	0.25	0.344828	0.297414	0.0972222	0.241379	0.169301	0	0	0						0.33	-0.99 : 2.22
chr5p15	51	0	0	0	0.0576923	0.16	0.108846	0.403846	0.293333	0.349679	0.038835	0.04	0.0385185	gain	0.137255				-1.24	-2.21 : 0.89
chr5p14	5	0	0	0	0.0185185	0.133333	0.076282	0.37963	0.253333	0.308236	0.0384615	0.0266667	0.0343567						-0.81	-0.9 : -0.8
chr5p13	54	0	0	0	0.00961538	0.133333	0.076282	0.394231	0.266667	0.330449	0.0280374	0.04	0.0296154						0.42	-1.15 : 2.45
chr5p12	11	0	0	0	0.0192308	0.133333	0.076282	0.365385	0.293333	0.329359	0.0192308	0.04	0.0296154						-0.74	-1.97 : 1.47
chr5q11	34	0	0	0	0.0948059	0.186667	0.14141	0.288462	0.186667	0.236931	0	0	0						0.38	-1.36 : 2.38
chr5q12	26	0	0	0	0.0825688	0.210526	0.144089	0.288462	0.186667	0.238306	0	0	0						0.53	-0.32 : 1.85
chr5q13	54	0	0	0	0.0869586	0.186667	0.134744	0.271845	0.165526	0.218554	0	0	0						-0.07	-1.36 : 1.41
chr5q14	45	0	0	0	0.0980392	0.175676	0.139551	0.269231	0.16	0.211667	0	0	0						-0.1	-1.91 : 1.95
chr5q15	23	0	0	0	0.0673077	0.173333	0.125128	0.259615	0.173333	0.216474	0	0	0						-0.07	-1.4 : 2.01
chr5q21	14	0	0	0	0.047848	0.173333	0.110705	0.262461	0.186667	0.224904	0	0	0						-0.66	-2.17 : 2.19
chr5q22	26	0	0	0	0.0458716	0.173333	0.108568	0.269231	0.184211	0.223141	0	0	0						-1	-2.39 : 0.32
chr5q23	37	0	0	0	0.0384615	0.186667	0.112564	0.277778	0.173333	0.223141	0	0	0						-0.83	-2.67 : 1.49
chr5q31	176	0	0	0	0.0384615	0.171053	0.103204	0.288462	0.186667	0.238601	0	0	0						0	-1.27 : 1.35
chr5q32	45	0	0	0	0.0366972	0.171053	0.100096	0.293578	0.186667	0.237564	0	0	0						0.61	-0.69 : 2.91
chr5q33	63	0	0	0	0.0480769	0.186667	0.117372	0.264706	0.173333	0.219502	0	0	0					pos	0.03	-1.51 : 2.09
chr5q34	13	0	0.0133333	0.00666666	0.0550459	0.186667	0.120856	0.247706	0.146667	0.200192	0	0	0						-0.68	-1.14 : -0.17
chr5q35	117	0	0.0133333	0.00666666	0.0555556	0.206897	0.128846	0.298077	0.213333	0.251916	0.00970874	0	0.00694444			loss	0.188342		-0.49	-2.21 : 1.07
chr6p25	34	0.00970874	0	0.00492623	0.485437	0.197242	0.337313	0.0682943	0.285728	0.175328	0	0	0	loss	0.758824	gain	0.941176		-1.7	-2.91 : -0.65
chr6p24	30	0.00970874	0	0.00485437	0.490741	0.175676	0.330819	0.066388	0.289524	0.177473	0	0	0	loss	0.966667	gain	0.966667		-1.28	-3.14 : -0.39
chr6p23	6	0.00975633	0	0.00487817	0.461165	0.135135	0.29815	0.0776699	0.337838	0.207754	0	0	0	loss	1	gain	1		-0.85	-1.92 : 0.19
chr6p22	100	0	0	0	0.347222	0.145702	0.244227	0.0776699	0.324324	0.200997	0	0	0	loss	0.85	gain	0.96		0.02	-1.21 : 1.15
chr6p21	269	0	0	0	0.339806	0.16	0.249082	0.106796	0.297297	0.202047	0	0	0	loss	0.631973	gain	0.776952		-0.96	-2.24 : 0.35
chr6p12	56	0	0	0	0.339806	0.145753	0.242577	0.0679612	0.325188	0.200681	0	0	0.00694444			gain	0.732143		-1.1	-1.71 : 0.43
chr6p11	3	0	0	0	0.291667	0.275862	0.283764	0.111111	0.344828	0.227969	0	0.0344828	0.0172414						6.8	3.25 : 6.8
chr6q11	1	0.0140845	0	0.00704225	0.183099	0.333333	0.258216	0.056338	0.259259	0.157799	0.0140845	0	0.00704225						0.33	0.33 : 0.33
chr6q12	4	0	0	0	0.1875	0.310345	0.248922	0.0833333	0.241379	0.162356	0.0138889	0	0.00694444						1.48	0.01 : 3.33
chr6q13	20	0	0	0	0.236111	0.413793	0.325938	0.0448161	0.123311	0.0920477	0	0	0						-0.06	-0.48 : 1.16
chr6q14	34	0	0	0	0.25	0.448276	0.349138	0.0416667	0.0729443	0.0622605	0.0138889	0	0.00694444						0.38	-1.07 : 2.35
chr6q15	23	0	0	0	0.236111	0.37931	0.307711	0.0555556	0.106667	0.0869354	0.0138889	0	0.00694444						1.72	-0.38 : 3.68
chr6q16	24	0	0	0	0.263889	0.344828	0.297414	0.0555556	0.0689655	0.0622605	0	0.0344828	0.0172414						2.01	0.11 : 3.99
chr6q21	47	0	0	0	0.236111	0.285714	0.262931	0.0833333	0.0933333	0.0794074	0	0	0						-0.22	-1.2 : 1.97
chr6q22	54	0	0	0	0.236111	0.241379	0.238745	0.0833333	0.172593	0.120746	0	0.0344828	0.0172414						-0.26	-1.94 : 2.36
chr6q23	49	0	0	0	0.236111	0.206897	0.221504	0.0833333	0.275862	0.179598	0	0.0344828	0.0172414						-0.72	-1.48 : 0.39
chr6q24	30	0	0	0	0.223787	0.206897	0.219036	0.0833333	0.275862	0.179598	0	0.0344828	0.0172414						-0.69	-3.22 : 1.69
chr6q25	68	0	0	0	0.211268	0.206897	0.214559	0.0972222	0.28869	0.203784	0	0	0						-0.53	-2.04 : 1.06
chr6q26	5	0	0	0	0.194444	0.241379	0.217912	0.111111	0.241379	0.176245	0	0	0						-0.95	-1.07 : -0.03
chr6q27	28	0	0	0	0.216745	0.275862	0.242831	0.138889	0.310345	0.224617	0	0	0						-0.81	-2.02 : 0.51
chr7p22	65	0	0.0131579	0.00657895	0.222222	0.0945946	0.157874	0.118812	0.357143	0.241852	0	0.0135135	0.00675675			gain	0.892377	neg	-1.9	-3.74 : -0.31
chr7p21	36	0	0.0135135	0.00675675	0.221154	0.0675676	0.144361	0.0961538	0.343647	0.223753	0	0.0135135	0.00675675			gain	0.916667		-1.42	-2.68 : -0.9
chr7p15	43	0	0.0135135	0.00675675	0.211538	0.0675676	0.139553	0.111111	0.378378	0.242074	0	0.0135135	0.00675675			gain	0.932326		-1.28	-2.63 : 0.01
chr7p14	54	0	0.0135135	0.00675675	0.213592	0.0675676	0.144361	0.105769	0.364865	0.235317	0	0.0136061	0.0115644			gain	1		-1.2	-2.86 : 0.25
chr7p13	29	0	0	0	0.236111	0.137931	0.187021	0.138889	0.381579	0.265873	0	0.0344828	0.0172414			gain	0.965517		-0.29	-1.98 : 1.29
chr7p12	20	0	0	0	0.25	0.137931	0.193966	0.125	0.37931	0.252155	0	0.0344828	0.0172414			gain	0.8		-1.33	-1.79 : 0.38
chr7p11	14	0	0	0	0.222222	0.103448	0.162835	0.152778	0.438424	0.292128	0	0.0344828	0.0172414			gain	1		-0.69	-1.32 : 1.56
chr7q11	71	0	0	0	0.208333	0.0344828	0.121408	0.138889	0.413793	0.286638	0	0	0			gain	0.746479		-1.01	-2.06 : 0.52
chr7q21	71	0	0	0	0.222222	0.0344828	0.128352	0.0972222	0.310345	0.203784	0	0	0			gain	0.457423		-0.34	-1.53 : 0.72
chr7q22	123	0	0	0	0.208333	0	0.104167	0.152778	0.413793	0.293582	0	0	0			gain	0.784878		-1.03	-2.29 : 0.27
chr7q31	58	0	0	0	0.210634	0	0.111111	0.0972222	0.344828	0.21408	0	0.0344828	0.0172414			gain	0.844828		-0.54	-1.76 : 1.39
chr7q32	46	0	0	0	0.222222	0	0.111111	0.0983154	0.37931	0.238266	0	0.0344828	0.0172414			gain	0.956522		-1.93	-3.44 : -0.04
chr7q33	23	0	0	0	0.222222	0	0.111111	0.0972222	0.37931	0.238266	0	0	0			gain	0.869565		-0.45	-2.88 : 1.62
chr7q34	53	0	0	0	0.25	0.0526316	0.142241	0.102941	0.37931	0.238951	0	0.0133333	0.00666666	loss	0.358496	gain	0.962264		-0.38	-1.33 : 0.6
chr7q35	18	0	0	0	0.25	0.0689655	0.159483	0.125	0.310345	0.217672	0	0.0344828	0.0172414						0.99	0.47 : 1.92
chr7q36	77	0	0	0	0.253521	0.0689655	0.162682	0.152778	0.413793	0.276341	0.0138889	0	0.00694444			gain	0.571429		-0.61	-1.76 : 0.61
chr8p23	56	0	0.013913	0.0114977	0.0972222	0.310345	0.203784	0.263889	0.275862	0.279474	0	0	0			loss	0.417143		-0.21	-1.03 : 1.03
chr8p22	20	0	0	0	0.111111	0.275862	0.197399	0.258705	0.310345	0.284525	0	0	0			loss	0.4		-0.69	-1.51 : 0.7
chr8p21	77	0	0	0	0.125	0.310345	0.21151	0.267606	0.275862	0.266523	0	0	0			loss	0.285714		-0.3	-1.83 : 2.2
chr8p12	21	0	0	0	0.0694444	0.310345	0.189895	0.253521	0.275862	0.273228	0	0	0			loss	1		-0.24	-1.42 : 0.99
chr8p11	48	0	0	0	0.056338	0.206897	0.13817	0.305556	0.344828	0.333261	0	0	0.00694444			loss	0.333333		0.41	-0.48 : 1.53
chr8q11	20	0	0	0	0.0699335	0.0689655	0.0633309	0.277778	0.431034	0.350934	0	0.0568708	0.0284354						0.54	-1.91 : 1.48
chr8q12	29	0	0	0	0.0833333	0.0689655	0.069205	0.259259	0.413793	0.338841	0.00925926	0.0689655	0.0344828						-0.86	-2.37 : 0.01
chr8q13	32	0	0	0	0.0704225	0.070197	0.0761494	0.25	0.37931	0.314655	0.0138889	0.0689655	0.0414272						0.27	-1.06 : 1.99
chr8q21	63	0	0	0	0.0972222	0.103448	0.100335	0.239437	0.37931	0.309373	0	0.0689655	0.0344828						0.53	-1.23 : 2.16
chr8q22	61	0	0.0344828	0.0172414	0.111111	0.103448	0.112538	0.236111	0.37931	0.309373	0	0.0344828	0.0172414						0.04	-1.53 : 2.66
chr8q23	18	0	0.0344828	0.0172414	0.138889	0.103448	0.121169	0.222222	0.332414	0.275174	0	0.0344828	0.0172414						0.08	-0.8 : 1.77
chr8q24	154	0	0	0	0.140845	0.103448	0.121169	0.222222	0.482759	0.34628	0.00961538	0.0344828	0.0178571			gain	0.428571		-0.65	-1.62 : 1.33
chr9p24	35	0	0	0	0.305556	0.448276	0.376916	0.125	0.137931	0.131466	0	0.0689655	0.0344828						0.13	-0.67 : 1.83
chr9p23	4	0	0	0	0.319444	0.448276	0.38386	0.111111	0.103448	0.10728	0	0.0344828	0.0172414						3.06	2.56 : 3.4
chr9p22	19	0	0	0	0.291667	0.413793	0.35273	0.126761	0.103448	0.119048	0	0	0						0.64	-0.4 : 3.37
chr9p21	46	0	0.00657895	0.00328947	0.291667	0.373333	0.324077	0.127666	0.119361	0.131466	0	0	0.00458716						-0.53	-1.01 : 1.11
chr9p13	86	0	0	0	0.208333	0.413793	0.311063	0.208333	0.137931	0.180077	0	0.0344828	0.0172414						0.74	-0.41 : 2.67
chr9p11	2	0.00694444	0	0.00347222	0.128676	0.178571	0.153624	0.228758	0.321429	0.275093	0	0.0357143	0.0178571						4.37	3.44 : 5.31
chr9q21	68	0	0	0	0.0833333	0.0689655	0.0761494	0.222222	0.420998	0.323789	0	0.0689655	0.0344828						0.33	-1.21 : 2.22
chr9q22	74	0	0	0	0.0972222	0.103448	0.100335	0.222222	0.413793	0.322907	0	0.0483257	0.0241629						-0.39	-1.29 : 1.64
chr9q31	54	0	0	0	0.111111	0.103448	0.102183	0.208333	0.413793	0.306557	0	0	0						-0.57	-1.71 : 0.76
chr9q32	31	0	0	0	0.126761	0.103448	0.115104	0.222222	0.413793	0.32136	0	0	0						-1.07	-3.11 : 1.14
chr9q33	76	0	0	0	0.152778	0.163273	0.147553	0.194237	0.37931	0.286877	0	0	0						0.29	-1.03 : 2.58
chr9q34	191	0.0192308	0	0.0138889	0.183099	0.241379	0.206731	0.25	0.275862	0.262931	0	0	0						-0.94	-2.03 : 0.81
chr10p15	30	0	0	0	0.569444	0.586207	0.577826	0.0416667	0.172414	0.10704	0	0	0						-1.84	-2.54 : -1.11
chr10p14	13	0	0	0	0.583333	0.506849	0.549721	0.037037	0.1	0.0685185	0	0	0						-0.68	-1.52 : 1.29
chr10p13	30	0	0	0	0.569444	0.551724	0.560584	0.0416667	0.172414	0.10704	0	0	0						-1.26	-2.63 : 1.04
chr10p12	46	0	0	0	0.541667	0.4848	0.515794	0.0366972	0.137931	0.0853175	0	0	0						-1.22	-2.49 : 0.82
chr10p11	24	0	0	0	0.541667	0.482759	0.512213	0.0419601	0.172414	0.112199	0	0	0						0.05	-1.12 : 1.38
chr10q11	50	0.0138889	0	0.00694444	0.745967	0.476455	0.600814	0.0139867	0.0892958	0.0562758	0	0	0	loss	0.48				-1.14	-2.46 : -0.45
chr10q21	42	0.0138889	0	0.00694444	0.861111	0.62069	0.733956	0.0138889	0.0344828	0.0248244	0	0	0	loss	0.523895			neg	-1.61	-2.69 : -0.09
chr10q22	85	0.0138889	0	0.00694444	0.893939	0.655172	0.778975	0	0.0344828	0.0172414	0	0	0	loss	0.682353			neg	-2.16	-4.2 : -0.38
chr10q23	82	0	0.0344828	0.0172414	0.873239	0.655172	0.758535	0.0138889	0.0344828	0.0241858	0	0	0	loss	0.378488				-0.75	-1.64 : 0.07
chr10q24	108	0	0	0	0.861111	0.655172	0.751197	0.0138889	0.0344828	0.0241858	0	0	0	loss	0.361111			neg	-1.81	-4.33 : -0.12
chr10q25	50	0	0	0	0.82243	0.613916	0.719431	0.0277778	0.0344828	0.0380747	0	0	0					neg	-0.53	-1.84 : 0.41
chr10q26	88	0	0	0	0.823221	0.586207	0.702826	0.0277778	0.0344828	0.0362842	0	0	0	loss	0.454545			neg	-1.59	-3.64 : 0.01
chr11p15	280	0	0	0	0.361905	0.410959	0.386432	0.0285714	0.0547945	0.0437704	0	0	0						-0.05	-1.24 : 1.39
chr11p14	23	0	0	0	0.314286	0.438356	0.376321	0.0285714	0.0416667	0.0395956	0	0	0						0.54	-1.66 : 2.32
chr11p13	35	0	0.0136986	0.00684931	0.320388	0.448276	0.381083	0.046729	0.0547945	0.0464449	0	0	0						-0.57	-1.55 : 0.81
chr11p12	7	0	0	0	0.314286	0.402778	0.355773	0.047619	0.0410959	0.0450192	0	0	0						-0.07	-0.94 : 1.12
chr11p11	68	0	0	0	0.268636	0.369863	0.32194	0.0857143	0.123288	0.10557	0	0	0						-0.24	-1.94 : 0.74
chr11q11	17	0	0	0	0.222222	0.3	0.254762	0.0380952	0.128571	0.0738095	0	0	0						-0.78	-1.19 : -0.26
chr11q12	175	0	0	0	0.2	0.287671	0.235153	0.0571429	0.084507	0.0772673	0	0	0						-0.71	-1.57 : 0.58
chr11q13	243	0	0	0	0.238095	0.260274	0.251272	0.0761905	0.111111	0.0929387	0	0	0						-0.59	-1.81 : 0.69
chr11q14	49	0	0	0	0.301887	0.30137	0.300794	0.0285714	0.0958904	0.0622309	0	0	0						-0.57	-1.62 : 0.92
chr11q21	24	0	0	0	0.317757	0.346667	0.332212	0.0280374	0.0666667	0.0447314	0	0.0133333	0.00666666						0.75	-0.94 : 2.28
chr11q22	51	0	0.0133333	0.00666666	0.349057	0.36	0.354891	0.0280374	0.0666667	0.047352	0	0.0133333	0.00675675						-0.83	-2.15 : 1.96
chr11q23	108	0	0	0	0.394231	0.413333	0.404922	0.0366972	0.0526316	0.0426726	0	0.0133333	0.00666666						0.17	-1.16 : 1.68
chr11q24	84	0	0	0	0.394366	0.448276	0.421321	0.0277778	0.0689655	0.0483716	0	0	0						-0.61	-1.71 : 0.79
chr11q25	12	0.0138889	0	0.00694444	0.375	0.482759	0.428879	0.0277778	0.0689655	0.0449483	0	0	0						1.55	0.23 : 2.64
chr12p13	181	0	0	0	0.247706	0.25	0.251449	0.0952381	0.131579	0.111661	0	0	0						-0.04	-1.11 : 1.06
chr12p12	50	0	0	0	0.247706	0.223684	0.235695	0.0917431	0.131579	0.111147	0	0.0131579	0.00657895						1.08	-0.98 : 2.33
chr12p11	31	0	0	0	0.256881	0.184211	0.225133	0.0841121	0.157895	0.122909	0.00917431	0	0.00917431						-0.56	-1.42 : 1.44
chr12q12	24	0	0	0	0.378214	0.118421	0.245292	0.0275229	0.0921053	0.057563	0	0	0.00458716	loss	0.958333				-1.07	-2.76 : 0.42
chr12q13	256	0	0	0	0.376147	0.131579	0.257849	0.0555556	0.118421	0.0847417	0	0	0	loss	0.847656				-0.69	-2.36 : 1.14
chr12q14	33	0	0	0	0.33945	0.131579	0.23811	0.0277778	0.118421	0.072972	0	0.0133333	0.00666666	loss	0.787879				-2.36	-3.16 : -0.83
chr12q15	22	0	0	0	0.318601	0.106667	0.213454	0.0277778	0.105572	0.0667793	0	0.0689655	0.0344828	loss	0.636364				-1.1	-2.1 : -0.26
chr12q21	59	0	0	0	0.291667	0.137931	0.213324	0.0185185	0.137931	0.0828544	0	0.0289855	0.0144928						-1.31	-2.32 : 0.71
chr12q22	19	0	0	0	0.277778	0.172414	0.225096	0.0416667	0.172414	0.10704	0	0	0						0.74	-1 : 2.5
chr12q23	71	0	0	0	0.275229	0.191176	0.235393	0.0416667	0.172414	0.100096	0	0	0						-0.93	-2.72 : 0.54
chr12q24	203	0	0	0	0.25	0.172414	0.211207	0.0972222	0.241379	0.169301	0	0	0						-0.9	-2.23 : 0.93
chr13q12	65	0.00943396	0	0.00471698	0.666667	0.62069	0.637793	0.0422535	0.137931	0.0897988	0.0138889	0	0.00694444						-1.16	-2.46 : -0.03
chr13q13	29	0.0138889	0	0.00694444	0.75	0.678571	0.714286	0.0416667	0.0689655	0.0622605	0.0138889	0	0.00694444						0.01	-0.97 : 1.3
chr13q14	77	0.0149254	0	0.00746269	0.875	0.724138	0.794803	0.0149254	0	0.0153846	0	0	0	loss	0.428571				-0.81	-2.33 : 0.77
chr13q21	11	0.0138889	0	0.00694444	0.692308	0.553846	0.632505	0.0694444	0.057971	0.0659049	0.0138889	0	0.00694444						0.3	-2.63 : 1
chr13q22	16	0.00934579	0	0.0046729	0.625	0.517241	0.564176	0.0694444	0.110407	0.0882668	0.0277778	0.00757576	0.0157166						-1.09	-1.79 : 1.34
chr13q31	9	0	0	0	0.527778	0.551724	0.55364	0.0972222	0.137931	0.117577	0.0277778	0	0.0138889						-1.28	-2.43 : -1.12
chr13q32	29	0	0	0	0.5	0.37931	0.428313	0.0972222	0.137931	0.117577	0.028169	0.0344828	0.0311303						-0.66	-2.03 : 0.37
chr13q33	18	0	0	0	0.439815	0.400132	0.422174	0.0962302	0.140394	0.112434	0.0277778	0.0305747	0.0270395						-0.55	-2.11 : 0.38
chr13q34	33	0	0	0	0.352113	0.357143	0.354268	0.140845	0.103448	0.128113	0.0416667	0.103448	0.065613						-0.99	-1.67 : 0.37
chr14q11	104	0	0	0	0.103489	0.206897	0.152059	0.305556	0.413793	0.359674	0	0	0.00684931						-0.04	-1.22 : 1.63
chr14q12	49	0	0	0	0.0825688	0.146667	0.113653	0.266055	0.344828	0.297414	0.00917431	0.0394737	0.024324						0.83	-0.66 : 2.57
chr14q13	20	0	0	0	0.0833333	0.241379	0.162356	0.272552	0.368227	0.323915	0	0	0						1.59	-0.76 : 4.86
chr14q21	33	0	0	0	0.125	0.310345	0.217672	0.25	0.241379	0.249042	0.0138889	0	0.00694444						1.4	-0.17 : 3.08
chr14q22	41	0	0	0	0.111111	0.275862	0.193487	0.263889	0.275862	0.269875	0.0138889	0	0.00694444					pos	0.74	-1.17 : 2.61
chr14q23	55	0	0	0	0.125	0.275862	0.200431	0.25	0.275862	0.27682	0.00934579	0	0.00694444						1.34	-0.6 : 2.9
chr14q24	102	0	0	0	0.125	0.241379	0.18319	0.268062	0.310345	0.287117	0.0138889	0	0.00694444						0.01	-1.28 : 1.58
chr14q31	16	0	0	0	0.0925926	0.2	0.146296	0.236111	0.239437	0.249042	0.00975633	0.0268468	0.0183016						-1.24	-2.62 : -0.19
chr14q32	129	0	0	0	0.111111	0.172414	0.141762	0.271429	0.344828	0.304358	0.00925926	0.0344828	0.0177875						0.36	-1.11 : 2.24
chr15q11	16	0	0.0344828	0.0172414	0.0416667	0.206897	0.124282	0.25	0.206897	0.228448	0.0277778	0	0.0138889					pos	0.24	-0.69 : 1.67
chr15q12	5	0	0.0138889	0.00694444	0.0298507	0.137931	0.0828544	0.25	0.206897	0.228448	0.0138889	0	0.00694444						-0.29	-0.62 : 0.39
chr15q13	17	0	0.0344828	0.0172414	0.0422535	0.137931	0.0897988	0.25	0.206897	0.228448	0.0277778	0	0.0157533						1.96	0.6 : 3.19
chr15q14	28	0	0	0	0.0416667	0.172414	0.10704	0.263889	0.206897	0.235393	0.0138889	0	0.00694444					pos	0.53	-0.69 : 2.44
chr15q15	85	0	0	0	0.0416667	0.172414	0.10704	0.291667	0.206897	0.249282	0.0138889	0	0.00694444					pos	1.29	-0.38 : 2.74
chr15q21	82	0	0	0	0.0416667	0.172414	0.10704	0.291667	0.172414	0.225747	0.0277778	0.0344828	0.0311303						0.92	-1.13 : 2.12
chr15q22	64	0	0	0	0.0416667	0.137931	0.0897988	0.319444	0.206897	0.26317	0.0277778	0.0344828	0.0311303						0.26	-1.54 : 2.35
chr15q23	32	0	0	0	0.0422535	0.137931	0.0897988	0.319444	0.25	0.281141	0.0289855	0.023908	0.0262975						1.07	-0.83 : 3.13
chr15q24	62	0	0	0	0.0555556	0.137931	0.0967433	0.347222	0.310345	0.328784	0.0555556	0	0.0277778						-0.1	-1.87 : 1.91
chr15q25	57	0	0	0	0.0416667	0.137931	0.0897988	0.361111	0.275862	0.314895	0.0422535	0	0.0249276	gain	0.877193				0.72	-1.12 : 2.15
chr15q26	68	0	0	0	0.0422535	0.137931	0.0897988	0.361111	0.310345	0.321839	0.0555556	0	0.0277778						1.37	-1.27 : 3.19
chr16p13	225	0	0	0	0.0972222	0.310345	0.202381	0.263889	0.172414	0.218151	0.0416667	0	0.0208333	gain	0.533333	loss	0.786667		0.75	-0.97 : 2.06
chr16p12	77	0	0	0	0.171429	0.37931	0.279933	0.166667	0.103448	0.135057	0	0	0						0.1	-0.85 : 2.13
chr16p11	100	0	0	0	0.208333	0.344828	0.279933	0.166667	0.137931	0.152299	0	0	0						-0.2	-1.32 : 1.75
chr16q11	7	0	0	0	0.638889	0.62069	0.629789	0.0138889	0.103448	0.0586686	0	0	0						-0.74	-1.17 : -0.43
chr16q12	50	0	0	0	0.638889	0.551724	0.595307	0.00948059	0.137931	0.0689655	0.0138889	0	0.00694444						-0.85	-2.12 : 0.72
chr16q13	13	0	0	0	0.638889	0.551724	0.595307	0.0138889	0.172414	0.0931513	0.0138889	0.0344828	0.0241858						-2.34	-2.82 : -1.13
chr16q21	33	0	0	0	0.633028	0.52	0.58501	0.0138889	0.0972222	0.0536616	0	0	0						-2.17	-3.31 : -0.46
chr16q22	109	0	0	0	0.625	0.551724	0.581418	0.0277778	0.137931	0.0828544	0	0	0.00694444					neg	-1.18	-2.25 : 0.18
chr16q23	53	0	0	0	0.625	0.551724	0.588362	0.0277778	0.103448	0.065613	0	0	0						-1.17	-2.63 : 0.13
chr16q24	72	0	0	0	0.583333	0.543719	0.566998	0.0416667	0.105296	0.0736278	0	0.0344828	0.0172414						-1.81	-2.67 : -0.34
chr17p13	215	0	0	0	0.692308	0.133333	0.404295	0.0192308	0.266667	0.144875	0	0	0.00480769	loss	1	gain	0.646512	neg	-1.69	-3.5 : -0.36
chr17p12	24	0	0	0	0.232246	0.0533333	0.146859	0.144931	0.24	0.192465	0.313994	0.0666667	0.19033	amp	0.791667				0.18	-0.63 : 1.12
chr17p11	62	0	0	0	0.173077	0.093964	0.133205	0.211538	0.293333	0.25484	0.312523	0.08	0.193687	amp	0.854839			pos	1.28	0.08 : 2.66
chr17q11	79	0	0	0	0.173077	0.291667	0.227969	0.182692	0.16	0.174949	0	0	0						0.7	-1.19 : 1.89
chr17q12	98	0	0	0	0.174312	0.246575	0.220121	0.165138	0.137931	0.15299	0	0	0						0.26	-1.01 : 1.67
chr17q21	256	0	0	0	0.201923	0.12	0.156154	0.165138	0.24	0.192115	0	0	0						-0.11	-1.55 : 1.67
chr17q22	42	0.00917431	0	0.00458716	0.240385	0.0666667	0.153526	0.163462	0.263158	0.207273	0	0	0						0.42	-0.82 : 2.28
chr17q23	54	0.00961538	0	0.00480769	0.26402	0.0789474	0.172629	0.147469	0.28	0.214304	0	0	0	loss	0.759259			neg	-1.13	-2.06 : -0.08
chr17q24	33	0	0	0	0.284404	0.0666667	0.179423	0.141509	0.276316	0.205449	0	0	0	loss	0.878788				-1.9	-3.05 : -0.14
chr17q25	177	0	0	0	0.259615	0.173333	0.221504	0.155963	0.306667	0.228397	0.0138889	0	0.00694444	loss	0.248588			neg	-1.47	-2.35 : -0.11
chr18p11	61	0	0	0	0.180556	0.148148	0.159439	0.149533	0.216216	0.176245	0.0138889	0.0344828	0.0241858						-0.25	-1.71 : 1.33
chr18q11	27	0	0	0	0.112676	0.275862	0.186542	0.203883	0.173333	0.178838	0.00980392	0	0.00694444						0.69	-0.68 : 2.39
chr18q12	44	0	0	0	0.19431	0.344828	0.263963	0.151861	0.137931	0.14643	0	0.0344828	0.0172414						-0.19	-1.84 : 1.61
chr18q21	76	0	0	0	0.236111	0.421182	0.32329	0.144823	0.0689655	0.110872	0	0	0						-0.6	-2.04 : 1.53
chr18q22	22	0	0	0	0.25	0.405093	0.320501	0.140516	0.0689655	0.103098	0.0046729	0	0.00233645						-0.65	-1.5 : 0.55
chr18q23	15	0	0.0344828	0.0172414	0.236111	0.413793	0.318008	0.152778	0.0689655	0.110872	0	0.0344828	0.0172414						-0.91	-1.51 : 0.91
chr19p13	522	0	0	0	0.0865385	0.16	0.132885	0.317308	0.213333	0.266762	0.0480769	0.0266667	0.0312281	gain	0.21728	loss	0.842912		0.11	-1.3 : 1.75
chr19p12	29	0	0	0	0.0865385	0.133333	0.109936	0.259615	0.275862	0.267949	0.00961538	0.0133333	0.0114744						1.34	0.76 : 2.71
chr19q12	10	0	0	0	0.133345	0.0405405	0.0848207	0.247642	0.378378	0.312405	0.0288462	0.0540541	0.0458949						-0.77	-1.37 : 0.73
chr19q13	741	0	0	0	0.355769	0.08	0.217885	0.137615	0.28	0.219872	0	0	0.00480769	loss	0.744939	gain	0.253711		-0.57	-1.68 : 0.84
chr20p13	82	0	0	0	0.169014	0.344828	0.264509	0.208333	0.137931	0.173132	0.0138889	0	0.00694444						-0.99	-1.97 : 0.69
chr20p12	37	0	0	0	0.166667	0.37931	0.272989	0.180556	0.0689655	0.131705	0	0	0.00694444			loss	0.272727		1.1	-0.22 : 3.8
chr20p11	50	0	0	0	0.138889	0.241379	0.190134	0.194444	0.267561	0.228694	0.0138889	0	0.00694444						-0.28	-1.53 : 0.79
chr20q11	117	0	0	0	0.0416667	0.0344828	0.0380747	0.333333	0.482759	0.403351	0.0138889	0.0357143	0.0311303						-0.92	-1.76 : 1
chr20q12	8	0	0	0	0.0331197	0.0442684	0.038694	0.237714	0.420084	0.32552	0	0	0.00337838						-0.51	-2.06 : 0.94
chr20q13	208	0	0	0	0.0416667	0.0540541	0.0461921	0.25	0.380445	0.317623	0	0.0268468	0.0135135						-0.97	-2.18 : 0.68
chr21p11	1	0.00990099	0	0.0049505	0.188119	0.203125	0.195622	0.138614	0.265625	0.202119	0	0.078125	0.0390625						-0.62	-0.62 : -0.62
chr21q11	6	0	0	0	0.111111	0.275862	0.193487	0.177234	0.247356	0.211603	0	0.0689655	0.0344828						-0.24	-1.31 : 0.64
chr21q21	22	0	0	0	0.136609	0.109416	0.126824	0.138889	0.37931	0.2591	0.0277778	0	0.0139867						-0.14	-1.67 : 1.63
chr21q22	123	0	0	0	0.134615	0.137931	0.13841	0.166667	0.37931	0.272989	0.0277778	0	0.0138889						-0.78	-2.39 : 1.1
chr22q11	103	0	0	0	0.12037	0.105263	0.114224	0.293578	0.448276	0.363027	0.0185185	0	0.0138889						-0.06	-1.43 : 1.34
chr22q12	109	0	0	0	0.125	0.137931	0.131466	0.268519	0.5	0.373324	0.0138889	0	0.00694444						-1.05	-2.57 : 0.76
chr22q13	177	0	0	0	0.138889	0.103448	0.122147	0.277778	0.551724	0.414751	0.0280374	0	0.0140845			gain	0.485876		-0.43	-2.24 : 0.99

## Sheet: TS5B - genes
Supplementary Table S5B: Enrichment of gene copy number variantion recurrence in hLMS and oLMS in merged cohort.
Column description: cytogenic band, gene symbol, % altered samples: percentage of altered samples with deletion, loss, gain or amplification in all LMS, hLMS and oLMS; Fisher's Exact test: indicates for hLMS and oLMS if the genes was significantly lost, gain deleted (del), amplified (amp) (Fisher's exact test < 0.01); Differential gene expression indicates the t-scores obtained for Affymetrix (Af…
cytogenic band	gene symbol	% altered samples												Fisher's Exact test		Differential gene expression
		deletion			loss			gain			amplification			hLMS	oLMS	Affy	TCGA	ICGC	median
		hLMS	oLMS	all	hLMS	oLMS	all	hLMS	oLMS	all	hLMS	oLMS	all
chr1p36	OR4F5	0.0140845	0	0.00704225	0.394366	0.0689655	0.231666	0.056338	0.448276	0.252307	0.0140845	0	0.00704225	loss	gain	NA	-1	-1.17114	-1.08557
chr1p36	SAMD11	0.00917431	0	0.00458716	0.522936	0.197183	0.360059	0.0366972	0.295775	0.166236	0	0	0	loss	gain	-0.651565	-7.04763	-4.3734	-4.3734
chr1p36	NOC2L	0.00917431	0	0.00458716	0.522936	0.197183	0.360059	0.0366972	0.309859	0.173278	0	0	0	loss	gain	-2.32266	-4.63107	-3.33087	-3.33087
chr1p36	KLHL17	0.0138889	0	0.00694444	0.583333	0.103448	0.343391	0.0416667	0.517241	0.279454	0	0	0	loss	gain	-1.68251	-4.16453	-5.29328	-4.16453
chr1p36	PLEKHN1	0.00925926	0	0.00462963	0.527778	0.197183	0.36248	0.037037	0.309859	0.173448	0	0	0	loss	gain	-0.411694	-5.45404	-3.52643	-3.52643
chr1p36	HES4	0.0138889	0	0.00694444	0.597222	0.103448	0.350335	0.0416667	0.517241	0.279454	0	0	0	loss	gain	6.98428	2.51382	3.04471	3.04471
chr1p36	ISG15	0.00917431	0	0.00458716	0.53211	0.191781	0.361945	0.0366972	0.30137	0.169034	0	0	0	loss	gain	2.68683	-1.33593	-0.804174	-0.804174
chr1p36	AGRN	0.00925926	0	0.00462963	0.527778	0.184211	0.355994	0.037037	0.302632	0.169834	0	0	0	loss	gain	-2.64468	-3.84704	-4.61264	-3.84704
chr1p36	RNF223	0.0138889	0	0.00694444	0.597222	0.103448	0.350335	0.0416667	0.517241	0.279454	0	0	0	loss	gain	NA	NA	-1.0349	-1.0349
chr1p36	C1orf159	0.00917431	0	0.00458716	0.541284	0.184211	0.362747	0.0366972	0.302632	0.169664	0	0	0	loss	gain	-1.97233	-5.29754	-6.09378	-5.29754
chr1p36	TTLL10	0.00917431	0	0.00458716	0.541284	0.197368	0.369326	0.0275229	0.302632	0.165077	0	0	0	loss	gain	0.251413	0.55631	-1.42002	0.251413
chr1p36	TNFRSF18	0.0138889	0	0.00694444	0.597222	0.103448	0.350335	0.0416667	0.517241	0.279454	0	0	0	loss	gain	-0.746813	-1.76722	-1.77443	-1.76722
chr1p36	TNFRSF4	0.0138889	0	0.00694444	0.597222	0.103448	0.350335	0.0416667	0.517241	0.279454	0	0	0	loss	gain	-3.21797	-2.44117	-4.29366	-3.21797
chr1p36	SDF4	0.00917431	0	0.00458716	0.550459	0.197368	0.373914	0.0275229	0.302632	0.165077	0	0	0	loss	gain	-5.5106	-6.90205	-6.89985	-6.89985
chr1p36	B3GALT6	0.0138889	0	0.00694444	0.597222	0.103448	0.350335	0.0416667	0.517241	0.279454	0	0	0	loss	gain	-5.0636	-8.8139	-7.72452	-7.72452
chr1p36	UBE2J2	0.00917431	0	0.00458716	0.541284	0.2	0.370642	0.0275229	0.306667	0.167095	0	0	0	loss	gain	-4.88873	-5.38949	-5.29491	-5.29491
chr1p36	SCNN1D	0.0138889	0	0.00694444	0.583333	0.103448	0.343391	0.0416667	0.517241	0.279454	0	0	0	loss	gain	0.0502025	2.41616	0.963591	0.963591
chr1p36	ACAP3	0.0138889	0	0.00694444	0.583333	0.103448	0.343391	0.0416667	0.517241	0.279454	0	0	0	loss	gain	-0.335906	-0.815603	-1.37443	-0.815603
chr1p36	PUSL1	0.0138889	0	0.00694444	0.583333	0.103448	0.343391	0.0416667	0.517241	0.279454	0	0	0	loss	gain	-4.65887	-4.75946	-4.44669	-4.65887
chr1p36	TAS1R3	0.0138889	0	0.00694444	0.583333	0.103448	0.343391	0.0416667	0.517241	0.279454	0	0	0	loss	gain	NA	-1.97309	-1.47538	-1.72424
chr1p36	DVL1	0.0140845	0	0.00704225	0.591549	0.103448	0.347499	0.0422535	0.517241	0.279747	0	0	0	loss	gain	-6.24282	-5.3706	-3.64073	-5.3706
chr1p36	MXRA8	0.0138889	0	0.00694444	0.597222	0.103448	0.350335	0.0416667	0.517241	0.279454	0	0	0	loss	gain	-9.96771	-7.75048	-5.3752	-7.75048
chr1p36	AURKAIP1	0.0138889	0	0.00694444	0.597222	0.103448	0.350335	0.0416667	0.517241	0.279454	0	0	0	loss	gain	-3.53472	-5.03386	-4.33446	-4.33446
chr1p36	CCNL2	0.0138889	0	0.00694444	0.597222	0.103448	0.350335	0.0416667	0.517241	0.279454	0	0	0	loss	gain	-2.97675	-1.25509	-3.58467	-2.97675
chr1p36	MRPL20	0.0138889	0	0.00694444	0.597222	0.103448	0.350335	0.0416667	0.517241	0.279454	0	0	0	loss	gain	-1.41149	-4.57519	-1.79771	-1.79771
chr1p36	ANKRD65	0.0138889	0	0.00694444	0.597222	0.103448	0.350335	0.0416667	0.517241	0.279454	0	0	0	loss	gain	1.12003	NA	0.604233	0.862131
chr1p36	TMEM88B	0.0138889	0	0.00694444	0.597222	0.103448	0.350335	0.0416667	0.517241	0.279454	0	0	0	loss	gain	NA	-1.46902	2.40642	0.468702
chr1p36	VWA1	0.0138889	0	0.00694444	0.597222	0.103448	0.350335	0.0416667	0.517241	0.279454	0	0	0	loss	gain	4.38291	0.130049	3.46264	3.46264
chr1p36	ATAD3C	0.028169	0	0.0140845	0.577465	0.103448	0.340457	0.0422535	0.517241	0.279747	0	0	0	loss	gain	1.80171	-0.367044	0.868655	0.868655
chr1p36	ATAD3B	0.0183486	0	0.00917431	0.53211	0.184211	0.35816	0.0275229	0.276316	0.151919	0	0	0	loss	gain	-3.49271	-5.18835	-2.63424	-3.49271
chr1p36	ATAD3A	0.00917431	0.0131579	0.0111661	0.541284	0.171053	0.356169	0.0275229	0.276316	0.151919	0	0	0	loss	gain	-2.61645	-4.69524	-4.25079	-4.25079
chr1p36	TMEM240	0.0138889	0	0.00694444	0.583333	0.103448	0.343391	0.0416667	0.517241	0.279454	0	0	0	loss	gain	NA	NA	2.43877	2.43877
chr1p36	SSU72	0.00917431	0	0.00458716	0.550459	0.171053	0.360756	0.0275229	0.289474	0.158498	0	0	0	loss	gain	-3.58691	-7.13298	-5.22315	-5.22315
chr1p36	MIB2	0.0138889	0	0.00694444	0.583333	0.103448	0.343391	0.0416667	0.517241	0.279454	0	0	0	loss	gain	-0.99816	-2.10902	-2.54109	-2.10902
chr1p36	MMP23B	0.0144928	0	0.00724638	0.565217	0.103448	0.334333	0.0434783	0.517241	0.28036	0	0	0	loss	gain	NA	-2.95807	-0.59673	-1.7774
chr1p36	CDK11B	0.0147059	0	0.00735294	0.558824	0.111111	0.334967	0.0441176	0.555556	0.299837	0	0	0	loss	gain	NA	-0.986401	-0.866264	-0.926333
chr1p36	SLC35E2B	0.0138889	0	0.00694444	0.569444	0.103448	0.336446	0.0416667	0.517241	0.279454	0	0	0	loss	gain	0.804666	NA	-3.48132	-1.33833
chr1p36	CDK11A	0.0140845	0	0.00704225	0.56338	0.111111	0.337246	0.0422535	0.555556	0.298905	0	0	0	loss	gain	-1.06756	0.578473	-3.45932	-1.06756
chr1p36	NADK	0.00917431	0	0.00458716	0.541284	0.2	0.370642	0.0366972	0.28	0.158349	0	0	0	loss	gain	-2.05696	-3.28293	-3.142	-3.142
chr1p36	GNB1	0.00917431	0	0.00458716	0.550459	0.2	0.375229	0.0366972	0.266667	0.151682	0	0	0	loss	gain	-4.97281	-6.72686	-5.21343	-5.21343
chr1p36	CALML6	0.0138889	0	0.00694444	0.569444	0.103448	0.336446	0.0555556	0.517241	0.286398	0	0	0	loss	gain	-1.14973	-0.846792	-0.0483678	-0.846792
chr1p36	TMEM52	0.0138889	0	0.00694444	0.569444	0.103448	0.336446	0.0555556	0.517241	0.286398	0	0	0	loss	gain	-1.53885	-3.25997	-1.57566	-1.57566
chr1p36	GABRD	0.0138889	0	0.00694444	0.569444	0.103448	0.336446	0.0555556	0.517241	0.286398	0	0	0	loss	gain	-0.959304	-2.82001	-1.93564	-1.93564
chr1p36	PRKCZ	0.00917431	0	0.00458716	0.522936	0.171053	0.346994	0.0366972	0.328947	0.182822	0	0	0	loss	gain	-0.417678	-2.57575	-0.312628	-0.417678
chr1p36	SKI	0.00925926	0	0.00462963	0.518519	0.173333	0.345926	0.037037	0.32	0.178519	0	0	0	loss	gain	-6.49809	-2.56127	-4.92887	-4.92887
chr1p36	MORN1	0.0138889	0	0.00694444	0.569444	0.103448	0.336446	0.0555556	0.517241	0.286398	0	0	0	loss	gain	-1.04341	0.393934	-1.276	-1.04341
chr1p36	RER1	0.0138889	0	0.00694444	0.569444	0.103448	0.336446	0.0555556	0.517241	0.286398	0	0	0	loss	gain	-4.8807	-5.59172	-5.5272	-5.5272
chr1p36	PEX10	0.0138889	0	0.00694444	0.569444	0.103448	0.336446	0.0555556	0.517241	0.286398	0	0	0	loss	gain	-3.44074	-5.09167	-4.75068	-4.75068
chr1p36	PLCH2	0.00925926	0	0.00462963	0.518519	0.171053	0.344786	0.037037	0.315789	0.176413	0	0	0	loss	gain	-0.751821	-1.01512	-1.54757	-1.01512
chr1p36	PANK4	0.00925926	0	0.00462963	0.518519	0.171053	0.344786	0.037037	0.315789	0.176413	0	0	0	loss	gain	-2.91124	-3.74285	-3.87773	-3.74285
chr1p36	HES5	0.0138889	0	0.00694444	0.569444	0.103448	0.336446	0.0555556	0.517241	0.286398	0	0	0	loss	gain	-1.31056	-1.48081	-1.62974	-1.48081
chr1p36	TNFRSF14	0.0138889	0	0.00694444	0.569444	0.103448	0.336446	0.0555556	0.517241	0.286398	0	0	0	loss	gain	1.98951	0.824536	0.720578	0.824536
chr1p36	MMEL1	0.00925926	0	0.00462963	0.518519	0.171053	0.344786	0.0462963	0.328947	0.187622	0	0	0	loss	gain	-1.32087	-1.40402	-0.335314	-1.32087
chr1p36	TTC34	0.0175439	0	0.00877193	0.526316	0.0909091	0.308612	0.0350877	0.590909	0.312998	0	0	0	loss	gain	NA	NA	-0.194967	-0.194967
chr1p36	ACTRT2	0.0138889	0	0.00694444	0.583333	0.103448	0.343391	0.0555556	0.517241	0.286398	0	0	0	loss	gain	-1.15098	-0.8574	NA	-1.00419
chr1p36	PRDM16	0.00917431	0	0.00458716	0.550459	0.16	0.355229	0.0550459	0.373333	0.21419	0	0	0	loss	gain	6.23054	7.51455	4.08356	6.23054
chr1p36	ARHGEF16	0.00917431	0	0.00458716	0.522936	0.157895	0.340415	0.0550459	0.328947	0.191997	0	0.0131579	0.00657895	loss	gain	1.35977	2.8519	0.710307	1.35977
chr1p36	MEGF6	0.00925926	0	0.00462963	0.527778	0.157895	0.342836	0.0555556	0.328947	0.192251	0	0.0131579	0.00657895	loss	gain	-1.80308	0.0810515	-1.4973	-1.4973
chr1p36	TPRG1L	0.0138889	0	0.00694444	0.569444	0.103448	0.336446	0.0555556	0.517241	0.286398	0	0	0	loss	gain	-2.75015	-1.69454	-1.25487	-1.69454
chr1p36	WRAP73	0.0138889	0	0.00694444	0.569444	0.103448	0.336446	0.0555556	0.517241	0.286398	0	0	0	loss	gain	-1.19175	NA	-1.80159	-1.49667
chr1p36	TP73	0.00917431	0	0.00458716	0.522936	0.197368	0.360152	0.0458716	0.315789	0.180831	0	0.0131579	0.00657895	loss	gain	3.06124	7.62211	6.32288	6.32288
chr1p36	CCDC27	0.0183486	0	0.00917431	0.495413	0.197368	0.346391	0.0366972	0.328947	0.182822	0	0.0131579	0.00657895	loss	gain	-0.05056	1.20228	1.57283	1.20228
chr1p36	SMIM1	0.0277778	0	0.0138889	0.555556	0.103448	0.329502	0.0416667	0.517241	0.279454	0	0	0	loss	gain	-0.61477	NA	0.492446	-0.0611623
chr1p36	LRRC47	0.00934579	0	0.0046729	0.514019	0.186667	0.350343	0.0373832	0.333333	0.185358	0	0.0133333	0.00666666	loss	gain	-3.20935	-4.08179	-3.95374	-3.95374
chr1p36	CEP104	0.0138889	0	0.00694444	0.569444	0.103448	0.336446	0.0416667	0.517241	0.279454	0	0	0	loss	gain	1.03828	NA	-1.4251	-0.193406
chr1p36	DFFB	0.0138889	0	0.00694444	0.569444	0.103448	0.336446	0.0416667	0.517241	0.279454	0	0	0	loss	gain	-5.16425	-4.92236	-4.94658	-4.94658
chr1p36	C1orf174	0.0138889	0	0.00694444	0.569444	0.103448	0.336446	0.0416667	0.517241	0.279454	0	0	0	loss	gain	-4.09018	-5.06827	-4.98988	-4.98988
chr1p36	AJAP1	0.00917431	0	0.00458716	0.550459	0.184211	0.367335	0.0458716	0.328947	0.187409	0	0.0131579	0.00657895	loss	gain	-0.221335	-2.58447	-2.38779	-2.38779
chr1p36	NPHP4	0.00925926	0	0.00462963	0.546296	0.16	0.353148	0.0555556	0.293333	0.174444	0	0.0133333	0.00666666	loss	gain	-6.51079	-5.04054	-5.58656	-5.58656
chr1p36	KCNAB2	0.0138889	0	0.00694444	0.569444	0.103448	0.336446	0.0555556	0.517241	0.286398	0	0	0	loss	gain	-4.55262	-2.36827	-6.53974	-4.55262
chr1p36	CHD5	0.0138889	0	0.00694444	0.569444	0.103448	0.336446	0.0555556	0.517241	0.286398	0	0	0	loss	gain	2.28205	3.65749	6.42549	3.65749
chr1p36	RPL22	0.0138889	0	0.00694444	0.569444	0.103448	0.336446	0.0555556	0.517241	0.286398	0	0	0	loss	gain	-4.65355	-3.81332	-0.844413	-3.81332
chr1p36	RNF207	0.0138889	0	0.00694444	0.569444	0.103448	0.336446	0.0555556	0.517241	0.286398	0	0	0	loss	gain	-0.053013	0.102665	-0.641528	-0.053013
chr1p36	ICMT	0.0138889	0	0.00694444	0.569444	0.103448	0.336446	0.0555556	0.517241	0.286398	0	0	0	loss	gain	-4.59594	-4.89749	-4.36297	-4.59594
chr1p36	HES3	0.0138889	0	0.00694444	0.569444	0.103448	0.336446	0.0555556	0.482759	0.269157	0	0.0344828	0.0172414	loss	gain	NA	NA	1.36317	1.36317
chr1p36	GPR153	0.0138889	0	0.00694444	0.569444	0.103448	0.336446	0.0555556	0.482759	0.269157	0	0.0344828	0.0172414	loss	gain	-7.15531	-3.55525	-2.37164	-3.55525
chr1p36	ACOT7	0.00917431	0	0.00458716	0.541284	0.162162	0.351723	0.0366972	0.297297	0.166997	0	0.0135135	0.00675675	loss	gain	1.45298	-1.12635	-0.311261	-0.311261
chr1p36	HES2	0.00917431	0	0.00458716	0.53211	0.197368	0.364739	0.0366972	0.289474	0.163085	0	0.0131579	0.00657895	loss	gain	-2.40707	-3.99992	-0.23592	-2.40707
chr1p36	ESPN	0.00917431	0	0.00458716	0.53211	0.197368	0.364739	0.0366972	0.289474	0.163085	0	0.0131579	0.00657895	loss	gain	-2.76664	-1.83738	-2.03744	-2.03744
chr1p36	TNFRSF25	0.0138889	0	0.00694444	0.569444	0.103448	0.336446	0.0555556	0.517241	0.286398	0	0	0	loss	gain	-4.19353	-1.05447	-3.28326	-3.28326
chr1p36	PLEKHG5	0.00934579	0	0.0046729	0.542056	0.2	0.371028	0.0373832	0.293333	0.165358	0.00934579	0	0.0046729	loss	gain	-2.84193	-0.78177	-3.77996	-2.84193
chr1p36	NOL9	0.0138889	0	0.00694444	0.569444	0.103448	0.336446	0.0555556	0.517241	0.286398	0	0	0	loss	gain	-2.57972	-3.33524	-5.75161	-3.33524
chr1p36	TAS1R1	0.0138889	0	0.00694444	0.569444	0.103448	0.336446	0.0555556	0.517241	0.286398	0	0	0	loss	gain	-0.574829	1.01257	2.34762	1.01257
chr1p36	ZBTB48	0.00917431	0	0.00458716	0.541284	0.148649	0.344967	0.0366972	0.310811	0.173754	0	0	0	loss	gain	-2.29462	-2.03496	-3.02496	-2.29462
chr1p36	KLHL21	0.00917431	0	0.00458716	0.541284	0.148649	0.344967	0.0366972	0.297297	0.166997	0	0	0	loss	gain	3.60014	4.27378	2.45811	3.60014
chr1p36	PHF13	0.0138889	0	0.00694444	0.569444	0.107143	0.338294	0.0555556	0.5	0.277778	0	0	0	loss	gain	2.05321	1.64459	0.615966	1.64459
chr1p36	THAP3	0.00917431	0	0.00458716	0.541284	0.148649	0.344967	0.0366972	0.297297	0.166997	0	0	0	loss	gain	-2.33376	-3.81261	-3.48556	-3.48556
chr1p36	DNAJC11	0.00925926	0	0.00462963	0.555556	0.148649	0.352102	0.0277778	0.297297	0.162538	0	0	0	loss	gain	-3.4049	-5.63223	-7.22109	-5.63223
chr1p36	CAMTA1	0.0283019	0	0.0141509	0.518868	0.171053	0.34496	0.0377358	0.342105	0.189921	0	0	0	loss	gain	2.90394	-1.7955	0.789198	0.789198
chr1p36	VAMP3	0	0	0	0.53211	0.157895	0.345002	0.0366972	0.289474	0.163085	0	0.0131579	0.00657895	loss	gain	-1.43724	-3.09331	-0.968988	-1.43724
chr1p36	PER3	0	0	0	0.53211	0.157895	0.345002	0.0366972	0.289474	0.163085	0	0.0131579	0.00657895	loss	gain	0.275345	3.52358	0.0439118	0.275345
chr1p36	UTS2	0	0	0	0.53211	0.157895	0.345002	0.0366972	0.289474	0.163085	0	0.0131579	0.00657895	loss	gain	1.50957	1.40306	1.00415	1.40306
chr1p36	TNFRSF9	0	0	0	0.522936	0.157895	0.340415	0.0458716	0.302632	0.174252	0	0.0131579	0.00657895	loss	gain	-3.05114	-3.71608	-4.21326	-3.71608
chr1p36	PARK7	0	0	0	0.513761	0.157895	0.335828	0.0366972	0.302632	0.169664	0	0.0131579	0.00657895	loss	gain	-2.00196	-4.13775	-2.05088	-2.05088
chr1p36	ERRFI1	0	0	0	0.527778	0.157895	0.342836	0.037037	0.289474	0.163255	0	0.0131579	0.00657895	loss	gain	-0.384545	-0.554	1.01118	-0.384545
chr1p36	SLC45A1	0	0	0	0.509259	0.173333	0.341296	0.0555556	0.306667	0.181111	0	0.0133333	0.00666666	loss	gain	-0.812227	1.66352	1.06416	1.06416
chr1p36	RERE	0	0	0	0.523364	0.173333	0.348349	0.046729	0.333333	0.190031	0	0.0133333	0.00666666	loss	gain	0.234438	3.02416	-2.27509	0.234438
chr1p36	ENO1	0	0	0	0.495413	0.157895	0.326654	0.0458716	0.368421	0.207146	0	0.0131579	0.00657895	loss	gain	-0.781365	-2.73953	-2.91495	-2.73953
chr1p36	CA6	0	0	0	0.495413	0.157895	0.326654	0.0458716	0.368421	0.207146	0	0.0131579	0.00657895	loss	gain	-2.05524	-0.184125	0.446654	-0.184125
chr1p36	SLC2A7	0	0	0	0.513761	0.157895	0.335828	0.0642202	0.342105	0.203163	0	0.0131579	0.00657895	loss	gain	NA	-0.111262	-2.00186	-1.05656
chr1p36	SLC2A5	0	0	0	0.513761	0.16	0.336881	0.0642202	0.333333	0.198777	0	0.0133333	0.00666666	loss	gain	-3.17886	-1.69649	-1.31864	-1.69649
chr1p36	GPR157	0	0	0	0.513761	0.16	0.336881	0.0642202	0.333333	0.198777	0	0.0133333	0.00666666	loss	gain	-4.36043	-1.55686	-4.13791	-4.13791
chr1p36	H6PD	0	0	0	0.513761	0.16	0.336881	0.0550459	0.333333	0.19419	0	0.0133333	0.00666666	loss	gain	-4.46047	-2.53582	-4.58446	-4.46047
chr1p36	SPSB1	0	0	0	0.513761	0.157895	0.335828	0.0550459	0.342105	0.198576	0	0.0131579	0.00657895	loss	gain	-6.04925	-2.79307	-6.80884	-6.04925
chr1p36	SLC25A33	0	0	0	0.541667	0.103448	0.322557	0.0833333	0.482759	0.283046	0	0	0	loss	gain	-2.58766	-3.49663	-3.00957	-3.00957
chr1p36	TMEM201	0	0	0	0.541667	0.103448	0.322557	0.0694444	0.482759	0.276102	0	0	0	loss	gain	-1.87752	-3.79747	-2.47512	-2.47512
chr1p36	PIK3CD	0	0	0	0.535211	0.103448	0.31933	0.084507	0.482759	0.283633	0	0	0	loss	gain	-3.98927	-3.99922	-4.02494	-3.99922
chr1p36	CLSTN1	0	0	0	0.518868	0.146667	0.332767	0.0566038	0.306667	0.181635	0	0.0133333	0.00666666	loss	gain	-0.374331	-0.823222	-0.653722	-0.653722
chr1p36	CTNNBIP1	0	0	0	0.504673	0.146667	0.32567	0.0560748	0.32	0.188037	0	0.0133333	0.00666666	loss	gain	-7.2696	-6.75854	-7.73529	-7.2696
chr1p36	LZIC	0	0	0	0.504673	0.146667	0.32567	0.046729	0.306667	0.176698	0	0.0133333	0.00666666	loss	gain	-2.43115	-3.07201	-0.354405	-2.43115
chr1p36	NMNAT1	0	0	0	0.509259	0.144737	0.326998	0.0462963	0.342105	0.194201	0	0.0131579	0.00657895	loss	gain	-0.973638	-2.27603	-2.53128	-2.27603
chr1p36	RBP7	0	0	0	0.527778	0.103448	0.315613	0.0694444	0.482759	0.276102	0	0	0	loss	gain	3.09531	4.3097	2.2248	3.09531
chr1p36	UBE4B	0	0	0	0.513761	0.148649	0.331205	0.0550459	0.351351	0.203199	0	0.0135135	0.00675675	loss	gain	-4.40684	-1.33774	-2.74782	-2.74782
chr1p36	KIF1B	0	0	0	0.509259	0.15493	0.332094	0.0555556	0.366197	0.210876	0	0.0140845	0.00704225	loss	gain	-2.40775	-0.970237	-2.05391	-2.05391
chr1p36	PGD	0	0	0	0.495413	0.144737	0.320075	0.0550459	0.342105	0.198576	0	0.0131579	0.00657895	loss	gain	-8.37204	-10.3894	-10.0162	-10.0162
chr1p36	CORT	0	0	0	0.486239	0.144737	0.315488	0.0550459	0.342105	0.198576	0	0.0131579	0.00657895	loss	gain	-1.72954	-2.42961	-2.26961	-2.26961
chr1p36	DFFA	0	0	0	0.486239	0.144737	0.315488	0.0550459	0.342105	0.198576	0	0.0131579	0.00657895	loss	gain	-1.10966	-4.55267	-2.9044	-2.9044
chr1p36	PEX14	0	0	0	0.490566	0.146667	0.318616	0.0471698	0.333333	0.190252	0	0.0133333	0.00666666	loss	gain	-2.07509	-2.58694	-2.31619	-2.31619
chr1p36	CASZ1	0	0	0	0.513889	0.103448	0.308669	0.0972222	0.482759	0.28999	0	0	0	loss	gain	2.73154	6.42285	6.48866	6.42285
chr1p36	C1orf127	0	0	0	0.5	0.107143	0.303571	0.111111	0.5	0.305556	0	0	0	loss	gain	0.358038	-2.13892	-2.2418	-2.13892
chr1p36	TARDBP	0	0	0	0.5	0.103448	0.301724	0.111111	0.517241	0.314176	0	0	0	loss	gain	-2.92504	-2.82538	-1.70372	-2.82538
chr1p36	MASP2	0	0	0	0.5	0.103448	0.301724	0.111111	0.517241	0.314176	0	0	0	loss	gain	-0.627255	2.83013	0.481074	0.481074
chr1p36	SRM	0	0	0	0.444444	0.146667	0.295556	0.0740741	0.386667	0.23037	0	0	0	loss	gain	-7.20017	-7.38138	-6.26541	-7.20017
chr1p36	EXOSC10	0	0	0	0.476636	0.146667	0.311651	0.0654206	0.386667	0.226044	0	0	0	loss	gain	-4.22715	-4.26672	-5.35447	-4.26672
chr1p36	MTOR	0	0	0	0.477064	0.144737	0.310901	0.0642202	0.407895	0.236057	0	0	0	loss	gain	-1.28662	-0.743345	-2.82146	-1.28662
chr1p36	ANGPTL7	0	0	0	0.477064	0.144737	0.310901	0.0642202	0.394737	0.229479	0	0	0	loss	gain	-1.4333	1.89829	-4.5775	-1.4333
chr1p36	UBIAD1	0	0	0	0.444444	0.144737	0.294591	0.0740741	0.421053	0.247563	0	0	0	loss	gain	-1.86888	-3.0479	-2.95507	-2.95507
chr1p36	FBXO2	0	0	0	0.486111	0.103448	0.29478	0.111111	0.551724	0.331418	0	0	0	loss	gain	-1.9368	-1.89843	-1.39886	-1.89843
chr1p36	FBXO44	0	0	0	0.46789	0.133333	0.300612	0.0733945	0.373333	0.223364	0	0	0	loss	gain	0.387767	0.461646	-0.551071	0.387767
chr1p36	FBXO6	0	0	0	0.46789	0.133333	0.300612	0.0733945	0.373333	0.223364	0	0	0	loss	gain	-1.21719	-2.78918	-1.83871	-1.83871
chr1p36	MAD2L2	0	0	0	0.46789	0.133333	0.300612	0.0733945	0.373333	0.223364	0	0	0	loss	gain	-1.37919	-2.73889	-2.24061	-2.24061
chr1p36	DRAXIN	0	0	0	0.486111	0.103448	0.29478	0.111111	0.551724	0.331418	0	0	0	loss	gain	-1.60361	NA	-1.3273	-1.46545
chr1p36	AGTRAP	0	0	0	0.486111	0.103448	0.29478	0.111111	0.551724	0.331418	0	0	0	loss	gain	-5.2791	-4.65748	-2.94669	-4.65748
chr1p36	MTHFR	0	0	0	0.462963	0.148649	0.305806	0.0740741	0.378378	0.226226	0	0	0	loss	gain	0.0292396	2.77203	0.131783	0.131783
chr1p36	CLCN6	0	0	0	0.46789	0.144737	0.306313	0.0733945	0.381579	0.227487	0	0	0	loss	gain	-0.888107	0.670025	-4.02544	-0.888107
chr1p36	NPPA	0	0	0	0.46789	0.144737	0.306313	0.0733945	0.381579	0.227487	0	0	0	loss	gain	-0.442264	1.28466	-1.00877	-0.442264
chr1p36	NPPB	0	0	0	0.486111	0.103448	0.29478	0.111111	0.551724	0.331418	0	0	0	loss	gain	-0.29905	0.275763	1.87739	0.275763
chr1p36	KIAA2013	0	0	0	0.46789	0.144737	0.306313	0.0825688	0.381579	0.232074	0	0	0	loss	gain	-2.90428	-3.78987	-2.19559	-2.90428
chr1p36	PLOD1	0	0	0	0.449541	0.144737	0.297139	0.0825688	0.394737	0.238653	0	0	0	loss	gain	-3.7656	-5.53298	-3.21052	-3.7656
chr1p36	MFN2	0	0	0	0.46789	0.146667	0.307278	0.0825688	0.4	0.241284	0	0	0	loss	gain	0.292822	0.232763	-0.0919191	0.232763
chr1p36	MIIP	0	0	0	0.46789	0.146667	0.307278	0.0825688	0.4	0.241284	0	0	0	loss	gain	-2.81382	-4.66265	-4.7344	-4.66265
chr1p36	TNFRSF8	0	0	0	0.472222	0.144737	0.30848	0.0833333	0.381579	0.232456	0	0	0	loss	gain	-1.66682	-5.48259	-4.30955	-4.30955
chr1p36	TNFRSF1B	0	0	0	0.46729	0.144737	0.306013	0.0747664	0.368421	0.221594	0	0	0	loss	gain	-2.61026	-2.36272	-3.57984	-2.61026
chr1p36	VPS13D	0	0	0	0.476636	0.144737	0.310686	0.0747664	0.407895	0.241331	0	0	0	loss	gain	-1.44081	2.65796	-1.7889	-1.44081
chr1p36	DHRS3	0	0	0	0.472222	0.103448	0.287835	0.111111	0.517241	0.314176	0	0	0	loss	gain	-1.00509	0.12847	-1.07201	-1.00509
chr1p36	AADACL4	0	0	0	0.458333	0.103448	0.280891	0.0972222	0.517241	0.307232	0	0	0	loss	gain	NA	0.717573	-0.121065	0.298254
chr1p36	AADACL3	0	0	0	0.458333	0.103448	0.280891	0.0972222	0.517241	0.307232	0	0	0	loss	gain	NA	-1.505	-0.0555	-0.78025
chr1p36	C1orf158	0	0	0	0.458333	0.103448	0.280891	0.0972222	0.517241	0.307232	0	0	0	loss	gain	-2.03703	-1.1261	-2.2526	-2.03703
chr1p36	PRAMEF12	0	0	0	0.458333	0.103448	0.280891	0.0972222	0.517241	0.307232	0	0	0	loss	gain	-1.5073	-1.04041	1.6995	-1.04041
chr1p36	PRAMEF1	0.0138889	0	0.00694444	0.444444	0.103448	0.273946	0.0972222	0.517241	0.307232	0	0	0	loss	gain	0.304533	-0.848449	-0.541536	-0.541536
chr1p36	PRAMEF11	0.0138889	0	0.00694444	0.444444	0.107143	0.275794	0.0972222	0.5	0.298611	0	0	0	loss	gain	-0.864344	-1.75054	-1	-1
chr1p36	HNRNPCL1	0.0138889	0	0.00694444	0.444444	0.137931	0.291188	0.0972222	0.517241	0.307232	0	0	0	loss	gain	0.0857242	1	0.455224	0.455224
chr1p36	PRAMEF2	0.0138889	0	0.00694444	0.430556	0.137931	0.284243	0.0972222	0.517241	0.307232	0	0	0	loss	gain	NA	-0.96882	1	0.0155901
chr1p36	PRAMEF4	0.00917431	0	0.00458716	0.394495	0.186667	0.290581	0.12844	0.426667	0.277554	0	0	0	loss	gain	NA	-0.455173	-1	-0.727586
chr1p36	PRAMEF10	0	0	0	0.277778	0.0689655	0.173372	0.0833333	0.37931	0.231322	0	0	0		gain	-1.20004	NA	-0.768902	-0.984469
chr1p36	PRAMEF6	0	0	0	0.309859	0.103448	0.206654	0.126761	0.413793	0.270277	0.0140845	0	0.00704225		gain	NA	-0.135147	1	0.432426
chr1p36	PRAMEF22	0.0138889	0	0.00694444	0.277778	0.103448	0.190613	0.0972222	0.37931	0.238266	0	0	0		gain	NA	NA	1	1
chr1p36	PRAMEF9	0	0	0	0.309859	0.103448	0.206654	0.126761	0.413793	0.270277	0.0140845	0	0.00704225		gain	NA	-1	NA	-1
chr1p36	PRAMEF13	0	0	0	0.277778	0.0689655	0.173372	0.0833333	0.37931	0.231322	0	0	0		gain	NA	-0.459918	NA	-0.459918
chr1p36	PRAMEF19	0	0	0	0.277778	0.0689655	0.173372	0.0833333	0.37931	0.231322	0	0	0		gain	NA	NA	1	1
chr1p36	PRAMEF20	0	0	0	0.277778	0.0689655	0.173372	0.0833333	0.37931	0.231322	0	0	0		gain	NA	-1.3454	-1.03434	-1.18987
chr1p36	PRAMEF17	0	0	0	0.28169	0.0689655	0.175328	0.084507	0.37931	0.231909	0	0	0		gain	NA	NA	-2.46086	-2.46086
chr1p36	LRRC38	0	0	0	0.458333	0.103448	0.280891	0.0972222	0.448276	0.272749	0	0	0	loss	gain	-1.57776	NA	-1.84904	-1.7134
chr1p36	PDPN	0	0	0	0.453704	0.146667	0.300185	0.0740741	0.373333	0.223704	0	0	0	loss	gain	-10.0383	-5.40807	-6.42762	-6.42762
chr1p36	PRDM2	0.00917431	0	0.00458716	0.449541	0.131579	0.29056	0.0733945	0.368421	0.220908	0	0	0	loss	gain	-4.32584	-1.31211	-3.7456	-3.7456
chr1p36	KAZN	0	0	0	0.455882	0.107143	0.281513	0.102941	0.5	0.301471	0	0	0	loss	gain	-3.27763	NA	-2.9247	-3.10116
chr1p36	TMEM51	0	0	0	0.431193	0.118421	0.274807	0.119266	0.434211	0.276738	0	0.0131579	0.00657895	loss	gain	2.10264	0.0203185	-0.832404	0.0203185
chr1p36	FHAD1	0	0	0	0.422018	0.118421	0.27022	0.110092	0.447368	0.27873	0	0	0	loss	gain	-3.40658	-5.91629	-6.26226	-5.91629
chr1p36	EFHD2	0	0	0	0.422018	0.118421	0.27022	0.0917431	0.381579	0.236661	0	0	0	loss	gain	-5.11351	-4.48049	-4.12686	-4.48049
chr1p36	CTRC	0	0	0	0.422018	0.131579	0.276799	0.0917431	0.368421	0.230082	0	0	0	loss	gain	-0.0530088	-2.41821	-2.05818	-2.05818
chr1p36	CELA2A	0	0	0	0.422018	0.131579	0.276799	0.0917431	0.368421	0.230082	0	0	0	loss	gain	-1.33851	-0.32191	-0.88961	-0.88961
chr1p36	CELA2B	0	0	0	0.431193	0.131579	0.281386	0.0917431	0.368421	0.230082	0	0	0	loss	gain	-1.93255	1.75526	-1.07988	-1.07988
chr1p36	CASP9	0	0	0	0.431193	0.131579	0.281386	0.0917431	0.368421	0.230082	0	0	0	loss	gain	-3.33403	-3.06099	-2.26013	-3.06099
chr1p36	DNAJC16	0	0	0	0.431193	0.131579	0.281386	0.0917431	0.368421	0.230082	0	0	0	loss	gain	-6.05343	-6.12416	-4.47167	-6.05343
chr1p36	AGMAT	0	0	0	0.425926	0.131579	0.278752	0.0925926	0.368421	0.230507	0	0	0	loss	gain	-3.62271	-7.59227	-4.87472	-4.87472
chr1p36	DDI2	0	0	0	0.425926	0.131579	0.278752	0.0925926	0.368421	0.230507	0	0	0	loss	gain	-7.98194	-2.00061	-6.9086	-6.9086
chr1p36	RSC1A1	0	0	0	0.430556	0.103448	0.267002	0.138889	0.448276	0.293582	0	0	0	loss	gain	NA	-2.85068	-7.23862	-5.04465
chr1p36	PLEKHM2	0	0	0	0.431193	0.131579	0.281386	0.0917431	0.368421	0.230082	0	0	0	loss	gain	-5.20785	-4.82957	-5.01462	-5.01462
chr1p36	SLC25A34	0	0	0	0.416667	0.142857	0.279762	0.0925926	0.357143	0.224868	0	0	0	loss	gain	-2.42388	-0.437713	-0.136928	-0.437713
chr1p36	TMEM82	0	0	0	0.430556	0.103448	0.267002	0.138889	0.448276	0.293582	0	0	0	loss	gain	NA	3.57579	0.845616	2.2107
chr1p36	FBLIM1	0	0	0	0.416667	0.142857	0.279762	0.0925926	0.357143	0.224868	0	0	0	loss	gain	5.48888	4.66329	3.47862	4.66329
chr1p36	UQCRHL	0	0	0	0.416667	0.170732	0.293699	0.0277778	0.268293	0.148035	0	0	0		gain	NA	-0.487879	2.42481	0.968464
chr1p36	SPEN	0	0	0	0.431193	0.133333	0.282263	0.0917431	0.346667	0.219205	0	0	0	loss	gain	-0.0966379	3.53419	-0.0350127	-0.0350127
chr1p36	ZBTB17	0	0	0	0.431193	0.133333	0.282263	0.0917431	0.346667	0.219205	0	0	0	loss	gain	-4.50699	-3.4299	-3.54252	-3.54252
chr1p36	HSPB7	0	0	0	0.440367	0.131579	0.285973	0.0917431	0.355263	0.223503	0	0	0	loss	gain	6.27854	3.89308	6.20412	6.20412
chr1p36	CLCNKA	0	0	0	0.416667	0.103448	0.260057	0.138889	0.448276	0.293582	0	0	0	loss	gain	-1.23886	2.06796	1.13424	1.13424
chr1p36	CLCNKB	0	0	0	0.440367	0.131579	0.285973	0.0917431	0.342105	0.216924	0	0	0	loss	gain	-1.07206	3.01921	2.74708	2.74708
chr1p36	FAM131C	0	0	0	0.425926	0.12	0.272963	0.0925926	0.346667	0.21963	0	0	0	loss	gain	0.875134	0.451571	0.650696	0.650696
chr1p36	EPHA2	0	0	0	0.422018	0.131579	0.276799	0.0917431	0.355263	0.223503	0	0.0131579	0.00657895	loss	gain	-5.60019	-2.64481	-3.52976	-3.52976
chr1p36	ARHGEF19	0	0	0	0.394495	0.131579	0.263037	0.0917431	0.355263	0.223503	0	0	0	loss	gain	-5.24266	-4.19237	-5.10349	-5.10349
chr1p36	FBXO42	0	0	0	0.412844	0.131579	0.272211	0.0917431	0.342105	0.216924	0	0	0	loss	gain	-2.87245	0.427674	-1.37997	-1.37997
chr1p36	SZRD1	0	0	0	0.430556	0.103448	0.267002	0.138889	0.448276	0.293582	0	0	0	loss	gain	-5.37388	NA	-5.07564	-5.22476
chr1p36	SPATA21	0	0	0	0.416667	0.133333	0.275	0.0925926	0.333333	0.212963	0	0	0	loss	gain	-1.22398	1.58705	-0.969634	-0.969634
chr1p36	NECAP2	0	0	0	0.412844	0.131579	0.272211	0.0917431	0.342105	0.216924	0	0	0	loss	gain	-6.44344	-8.18238	-7.24293	-7.24293
chr1p36	NBPF1	0	0	0	0.416667	0.103448	0.260057	0.138889	0.482759	0.310824	0	0	0	loss	gain	-4.48788	2.03109	-0.649732	-0.649732
chr1p36	CROCC	0	0	0	0.357798	0.136986	0.247392	0.119266	0.369863	0.244565	0	0	0	loss	gain	-2.19344	-0.476779	-1.76338	-1.76338
chr1p36	MST1L	0	0	0	0.357143	0.137931	0.247537	0.142857	0.517241	0.330049	0	0	0		gain	-0.725912	NA	1.89903	0.58656
chr1p36	MFAP2	0	0	0	0.357798	0.133333	0.245566	0.110092	0.36	0.235046	0	0	0	loss	gain	-5.44703	-6.12585	-4.19911	-5.44703
chr1p36	ATP13A2	0	0	0	0.357798	0.133333	0.245566	0.110092	0.36	0.235046	0	0	0	loss	gain	-4.0142	-7.4224	-7.44788	-7.4224
chr1p36	SDHB	0	0	0	0.376147	0.133333	0.25474	0.100917	0.36	0.230459	0	0	0	loss	gain	0.0939295	-2.5054	-0.464206	-0.464206
chr1p36	PADI2	0	0	0	0.376147	0.133333	0.25474	0.100917	0.36	0.230459	0	0	0	loss	gain	-1.48688	-2.27502	2.12568	-1.48688
chr1p36	PADI1	0	0	0	0.402778	0.103448	0.253113	0.125	0.482759	0.303879	0	0	0	loss	gain	-0.780698	-2.7329	-0.301955	-0.780698
chr1p36	PADI3	0	0	0	0.402778	0.103448	0.253113	0.125	0.482759	0.303879	0	0	0	loss	gain	-0.0371982	-1.5982	-1.2609	-1.2609
chr1p36	PADI4	0	0	0	0.408451	0.107143	0.257797	0.126761	0.464286	0.295523	0	0	0	loss	gain	-1.29732	-0.95281	-0.157002	-0.95281
chr1p36	PADI6	0	0	0	0.402778	0.103448	0.253113	0.138889	0.448276	0.293582	0	0	0	loss	gain	NA	-1.2474	0.656623	-0.295386
chr1p36	RCC2	0	0	0	0.402778	0.103448	0.253113	0.138889	0.448276	0.293582	0	0	0	loss	gain	-4.04212	-6.09141	-5.55306	-5.55306
chr1p36	ARHGEF10L	0	0	0	0.330275	0.133333	0.231804	0.119266	0.386667	0.252966	0	0.0133333	0.00666666	loss	gain	7.71442	6.10715	5.39884	6.10715
chr1p36	ACTL8	0	0	0	0.302752	0.12	0.211376	0.110092	0.36	0.235046	0	0.0133333	0.00666666	loss	gain	-0.304429	-1.10994	-1.66022	-1.10994
chr1p36	IGSF21	0.00917431	0	0.00458716	0.321101	0.123288	0.222194	0.119266	0.369863	0.244565	0	0.0136986	0.00684931	loss	gain	1.80183	0.935208	1.49735	1.49735
chr1p36	KLHDC7A	0	0	0	0.293578	0.123288	0.208433	0.12844	0.356164	0.242302	0	0.0136986	0.00684931	loss	gain	-0.942704	0.0718294	0.882306	0.0718294
chr1p36	PAX7	0	0	0	0.311927	0.118421	0.215174	0.100917	0.368421	0.234669	0	0	0	loss	gain	-1.01645	-2.95353	0.392449	-1.01645
chr1p36	TAS1R2	0	0	0	0.319444	0.103448	0.211446	0.138889	0.448276	0.293582	0	0	0		gain	2.46875	0.544926	0.0498262	0.544926
chr1p36	ALDH4A1	0	0	0	0.314815	0.109589	0.212202	0.111111	0.383562	0.247336	0	0.0136986	0.00684931	loss	gain	2.70228	3.62499	2.37405	2.70228
chr1p36	IFFO2	0	0	0	0.324074	0.109589	0.216832	0.111111	0.383562	0.247336	0	0.0136986	0.00684931	loss	gain	3.49661	3.29876	3.90854	3.49661
chr1p36	UBR4	0	0	0	0.311927	0.118421	0.215174	0.100917	0.368421	0.234669	0	0	0	loss	gain	-0.394239	3.55912	0.555123	0.555123
chr1p36	EMC1	0	0	0	0.319444	0.103448	0.211446	0.138889	0.448276	0.293582	0	0	0		gain	-3.86897	NA	-3.22994	-3.54946
chr1p36	MRTO4	0	0	0	0.311927	0.118421	0.215174	0.100917	0.368421	0.234669	0	0	0	loss	gain	-4.95969	-5.01855	-4.26334	-4.95969
chr1p36	AKR7A3	0	0	0	0.319444	0.103448	0.211446	0.138889	0.448276	0.293582	0	0	0		gain	-4.4358	-1.20487	-2.16718	-2.16718
chr1p36	AKR7A2	0	0	0	0.293578	0.118421	0.206	0.100917	0.394737	0.247827	0	0	0	loss	gain	-3.57667	-3.79716	-2.27798	-3.57667
chr1p36	CAPZB	0	0	0	0.302752	0.118421	0.210587	0.100917	0.394737	0.247827	0	0	0	loss	gain	-5.80291	-4.4344	-5.58447	-5.58447
chr1p36	NBL1	0	0	0	0.293578	0.12	0.206789	0.100917	0.386667	0.243792	0	0	0	loss	gain	-5.68518	-2.41133	-3.2635	-3.2635
chr1p36	HTR6	0	0	0	0.302752	0.12	0.211376	0.100917	0.386667	0.243792	0	0	0	loss	gain	0.823105	-1.17766	-1.46157	-1.17766
chr1p36	TMCO4	0	0	0	0.302752	0.118421	0.210587	0.100917	0.394737	0.247827	0	0	0	loss	gain	3.5973	7.59744	1.80338	3.5973
chr1p36	RNF186	0	0	0	0.305556	0.0985915	0.202074	0.101852	0.408451	0.255151	0	0	0	loss	gain	-1.76721	-0.208102	-1.61991	-1.61991
chr1p36	OTUD3	0	0	0	0.314815	0.0985915	0.206703	0.101852	0.380282	0.241067	0	0	0	loss	gain	0.624506	0.677158	-1.32584	0.624506
chr1p36	PLA2G2E	0	0	0	0.314815	0.0985915	0.206703	0.101852	0.380282	0.241067	0	0	0	loss	gain	-1.73741	NA	0.0388937	-0.84926
chr1p36	PLA2G2A	0	0	0	0.296296	0.0985915	0.197444	0.101852	0.380282	0.241067	0	0.0140845	0.00704225	loss	gain	-5.93108	-1.48658	-2.29487	-2.29487
chr1p36	PLA2G5	0	0	0	0.284404	0.118421	0.201412	0.100917	0.368421	0.234669	0	0.0131579	0.00657895	loss	gain	1.43197	-0.459146	-0.14801	-0.14801
chr1p36	PLA2G2D	0	0	0	0.284404	0.118421	0.201412	0.100917	0.368421	0.234669	0	0.0131579	0.00657895	loss	gain	0.4801	-0.0555287	-0.743225	-0.0555287
chr1p36	PLA2G2F	0	0	0	0.275229	0.118421	0.196825	0.100917	0.394737	0.247827	0	0.0131579	0.00657895	loss	gain	-1.23118	-1.09923	-0.19749	-1.09923
chr1p36	PLA2G2C	0	0	0	0.284404	0.118421	0.201412	0.100917	0.394737	0.247827	0	0.0131579	0.00657895	loss	gain	NA	-1.03616	-0.508769	-0.772466
chr1p36	UBXN10	0	0	0	0.284404	0.118421	0.201412	0.100917	0.394737	0.247827	0	0.0131579	0.00657895	loss	gain	-3.19153	0.821749	-1.57447	-1.57447
chr1p36	VWA5B1	0	0	0	0.305556	0.103448	0.204502	0.138889	0.482759	0.310824	0	0	0		gain	-1.59023	-2.50178	-0.963177	-1.59023
chr1p36	CAMK2N1	0	0	0	0.305556	0.103448	0.204502	0.152778	0.482759	0.317768	0	0	0		gain	-6.41103	-2.28949	-3.86579	-3.86579
chr1p36	MUL1	0	0	0	0.287037	0.118421	0.202729	0.12037	0.381579	0.250975	0	0	0	loss	gain	-1.93113	-2.68544	-2.66689	-2.66689
chr1p36	FAM43B	0	0	0	0.305556	0.103448	0.204502	0.152778	0.482759	0.317768	0	0	0		gain	-3.68592	-3.48991	-0.526908	-3.48991
chr1p36	CDA	0	0	0	0.284404	0.118421	0.201412	0.119266	0.368421	0.243844	0	0	0	loss	gain	-3.48444	-2.372	0.21858	-2.372
chr1p36	PINK1	0	0	0	0.28972	0.111111	0.200415	0.121495	0.375	0.248248	0	0	0	loss	gain	-2.44406	-2.2382	-0.184931	-2.2382
chr1p36	DDOST	0	0	0	0.28972	0.111111	0.200415	0.130841	0.416667	0.273754	0	0	0	loss	gain	-5.01843	-6.69817	-5.31522	-5.31522
chr1p36	KIF17	0	0	0	0.280374	0.111111	0.195742	0.140187	0.416667	0.278427	0	0	0	loss	gain	-1.44604	-2.88691	-1.84805	-1.84805
chr1p36	SH2D5	0	0	0	0.271028	0.111111	0.19107	0.140187	0.416667	0.278427	0	0	0	loss	gain	-1.78474	-1.01909	-1.24696	-1.24696
chr1p36	HP1BP3	0	0	0	0.291667	0.103448	0.197557	0.166667	0.482759	0.324713	0	0	0		gain	-1.08654	2.01205	-1.43936	-1.08654
chr1p36	EIF4G3	0	0	0	0.273585	0.118421	0.196003	0.132075	0.407895	0.269985	0	0	0	loss	gain	-3.04644	-4.45481	-8.88142	-4.45481
chr1p36	ECE1	0	0	0	0.275229	0.118421	0.196825	0.12844	0.421053	0.274746	0	0	0	loss	gain	-0.828763	1.6606	0.272257	0.272257
chr1p36	NBPF3	0	0	0	0.279412	0.107143	0.193277	0.176471	0.5	0.338235	0	0	0		gain	NA	-1.3825	-2.57753	-1.98001
chr1p36	ALPL	0	0	0	0.256881	0.144737	0.200809	0.12844	0.381579	0.25501	0	0	0		gain	-3.69436	-4.28562	-2.77651	-3.69436
chr1p36	RAP1GAP	0	0	0	0.256881	0.144737	0.200809	0.137615	0.407895	0.272755	0	0	0		gain	-1.07771	3.03593	0.879742	0.879742
chr1p36	USP48	0	0	0	0.268519	0.133333	0.200926	0.138889	0.4	0.269444	0	0	0		gain	-0.717298	0.855861	-1.82071	-0.717298
chr1p36	LDLRAD2	0	0	0	0.266055	0.12	0.193028	0.119266	0.36	0.239633	0	0	0		gain	NA	2.02847	2.06066	2.04456
chr1p36	HSPG2	0	0	0	0.268519	0.12	0.194259	0.12037	0.373333	0.246852	0	0	0		gain	2.18772	3.8011	1.20747	2.18772
chr1p36	CELA3B	0	0	0	0.25	0.103448	0.176724	0.180556	0.482759	0.331657	0	0	0		gain	-0.92054	-0.284163	0.311695	-0.284163
chr1p36	CELA3A	0	0	0	0.267606	0.103448	0.185527	0.169014	0.482759	0.325886	0	0	0		gain	-1.43566	-0.208788	-0.346085	-0.346085
chr1p36	CDC42	0	0	0	0.256881	0.12	0.18844	0.119266	0.373333	0.2463	0	0	0		gain	-2.60335	-4.2405	-3.52658	-3.52658
chr1p36	WNT4	0	0	0	0.247706	0.12	0.183853	0.12844	0.386667	0.257554	0	0	0		gain	-1.56504	-0.981037	-4.01193	-1.56504
chr1p36	ZBTB40	0	0	0	0.277778	0.103448	0.190613	0.166667	0.482759	0.324713	0	0	0		gain	6.55478	7.843	2.93738	6.55478
chr1p36	EPHA8	0	0	0	0.277778	0.103448	0.190613	0.166667	0.482759	0.324713	0	0	0		gain	-3.38392	0.336052	1.16767	0.336052
chr1p36	C1QA	0	0	0	0.256881	0.12	0.18844	0.12844	0.346667	0.237554	0	0.0133333	0.00666666		gain	-1.37008	-3.3434	-2.44041	-2.44041
chr1p36	C1QC	0	0	0	0.256881	0.12	0.18844	0.12844	0.346667	0.237554	0	0.0133333	0.00666666		gain	-1.39121	-4.00814	-3.08346	-3.08346
chr1p36	C1QB	0	0	0	0.256881	0.12	0.18844	0.12844	0.346667	0.237554	0	0.0133333	0.00666666		gain	-1.24548	-3.91762	-2.65423	-2.65423
chr1p36	EPHB2	0	0	0	0.266055	0.118421	0.192238	0.137615	0.407895	0.272755	0	0	0		gain	-3.66965	-7.59203	-4.86538	-4.86538
chr1p36	KDM1A	0	0	0	0.266055	0.12	0.193028	0.12844	0.386667	0.257554	0	0	0		gain	-2.76366	-4.51764	-3.81435	-3.81435
chr1p36	LUZP1	0	0	0	0.266055	0.12	0.193028	0.12844	0.386667	0.257554	0	0	0		gain	-6.00867	-4.55703	-7.95065	-6.00867
chr1p36	HTR1D	0	0	0	0.247619	0.117647	0.182633	0.133333	0.411765	0.272549	0	0	0		gain	-1.46577	-3.72037	-1.61464	-1.61464
chr1p36	HNRNPR	0	0	0	0.259615	0.0985915	0.179103	0.134615	0.380282	0.257449	0	0	0	loss	gain	-3.28272	-3.08591	-3.58979	-3.28272
chr1p36	ZNF436	0	0	0	0.259615	0.0985915	0.179103	0.134615	0.380282	0.257449	0	0	0	loss	gain	-4.7817	-1.01998	-3.50919	-3.50919
chr1p36	TCEA3	0	0	0	0.247706	0.118421	0.183064	0.119266	0.368421	0.243844	0	0	0		gain	4.56929	1.80667	4.38082	4.38082
chr1p36	ASAP3	0	0	0	0.247706	0.131579	0.189643	0.12844	0.368421	0.248431	0	0	0		gain	-9.14356	-10.766	-10.0767	-10.0767
chr1p36	E2F2	0	0	0	0.238532	0.131579	0.185056	0.12844	0.368421	0.248431	0	0	0		gain	0.482477	1.14176	-0.63705	0.482477
chr1p36	ID3	0	0	0	0.25	0.103448	0.176724	0.166667	0.482759	0.324713	0	0	0		gain	-3.45751	-3.8195	-7.49463	-3.8195
chr1p36	RPL11	0	0	0	0.25	0.103448	0.176724	0.166667	0.482759	0.324713	0	0	0		gain	-3.13623	-3.49706	-1.41652	-3.13623
chr1p36	PITHD1	0	0	0	0.25	0.103448	0.176724	0.166667	0.482759	0.324713	0	0	0		gain	-4.80411	NA	-3.16623	-3.98517
chr1p36	LYPLA2	0	0	0	0.25	0.103448	0.176724	0.166667	0.482759	0.324713	0	0	0		gain	-6.9792	-7.34887	-8.02929	-7.34887
chr1p36	GALE	0	0	0	0.25	0.103448	0.176724	0.166667	0.482759	0.324713	0	0	0		gain	-3.17732	-3.41891	-4.09457	-3.41891
chr1p36	HMGCL	0	0	0	0.219048	0.109589	0.164318	0.12381	0.342466	0.233138	0	0	0		gain	0.442037	-0.290252	-0.634904	-0.290252
chr1p36	FUCA1	0	0	0	0.25	0.103448	0.176724	0.166667	0.482759	0.324713	0	0	0		gain	-2.49107	-2.20593	-3.11718	-2.49107
chr1p36	CNR2	0	0	0	0.25	0.103448	0.176724	0.166667	0.482759	0.324713	0	0	0		gain	-0.0980319	-0.607955	-0.828304	-0.607955
chr1p36	PNRC2	0	0	0	0.25	0.103448	0.176724	0.166667	0.482759	0.324713	0	0	0		gain	NA	0.420125	-0.193088	0.113518
chr1p36	SRSF10	0	0	0	0.25	0.103448	0.176724	0.166667	0.482759	0.324713	0	0	0		gain	NA	NA	-1.88677	-1.88677
chr1p36	MYOM3	0	0	0	0.25	0.103448	0.176724	0.166667	0.482759	0.324713	0	0	0		gain	-1.79481	-2.30704	-0.186315	-1.79481
chr1p36	IL22RA1	0	0	0	0.25	0.103448	0.176724	0.166667	0.482759	0.324713	0	0	0		gain	1.96307	6.98618	3.92802	3.92802
chr1p36	IFNLR1	0	0	0	0.25	0.103448	0.176724	0.166667	0.482759	0.324713	0	0	0		gain	1.75658	NA	2.16026	1.95842
chr1p36	GRHL3	0	0	0	0.25	0.103448	0.176724	0.166667	0.517241	0.341954	0	0	0		gain	-0.0800308	1.40629	-0.403331	-0.0800308
chr1p36	STPG1	0	0	0	0.25	0.103448	0.176724	0.166667	0.517241	0.341954	0	0	0		gain	-2.78378	NA	-1.96159	-2.37268
chr1p36	NIPAL3	0	0	0	0.25	0.103448	0.176724	0.166667	0.517241	0.341954	0	0	0		gain	-2.64118	-2.76157	-1.25955	-2.64118
chr1p36	RCAN3	0	0	0	0.25	0.103448	0.176724	0.166667	0.517241	0.341954	0	0	0		gain	-0.290902	-1.59621	-0.384447	-0.384447
chr1p36	NCMAP	0	0	0	0.25	0.103448	0.176724	0.166667	0.482759	0.324713	0	0	0		gain	NA	NA	-0.648087	-0.648087
chr1p36	SRRM1	0	0	0	0.25	0.103448	0.176724	0.166667	0.482759	0.324713	0	0	0		gain	1.59196	1.77717	-1.36114	1.59196
chr1p36	CLIC4	0	0	0	0.228571	0.121622	0.175097	0.12381	0.378378	0.251094	0	0	0		gain	7.43407	5.1391	6.98787	6.98787
chr1p36	RUNX3	0	0	0	0.220183	0.12	0.170092	0.12844	0.36	0.24422	0	0	0		gain	2.34717	-2.55302	-0.191899	-0.191899
chr1p36	SYF2	0	0	0	0.239437	0.103448	0.171442	0.169014	0.482759	0.325886	0	0	0		gain	-0.192354	-0.0274031	0.93836	-0.0274031
chr1p36	RHD	0.0147059	0	0.00735294	0.191176	0.115385	0.153281	0.161765	0.461538	0.311652	0	0	0		gain	-1.57856	-0.752218	-1.11958	-1.11958
chr1p36	TMEM50A	0	0	0	0.236111	0.103448	0.16978	0.166667	0.517241	0.341954	0	0	0		gain	-2.71903	-3.76922	-3.24778	-3.24778
chr1p36	RHCE	0	0	0	0.239437	0.111111	0.175274	0.169014	0.518519	0.343766	0	0	0		gain	-2.8781	-2.1161	-3.42259	-2.8781
chr1p36	LDLRAP1	0	0	0	0.236111	0.103448	0.16978	0.166667	0.482759	0.324713	0	0	0		gain	-6.411	-3.50593	-4.29579	-4.29579
chr1p36	MAN1C1	0	0	0	0.212963	0.131579	0.172271	0.12963	0.394737	0.262183	0	0	0		gain	5.3748	5.72267	2.13613	5.3748
chr1p36	MTFR1L	0	0	0	0.25	0.103448	0.176724	0.166667	0.482759	0.324713	0	0	0		gain	2.29435	NA	3.0015	2.64792
chr1p36	AUNIP	0	0	0	0.25	0.103448	0.176724	0.166667	0.482759	0.324713	0	0	0		gain	-3.52256	NA	-4.84675	-4.18465
chr1p36	PAQR7	0	0	0	0.222222	0.121622	0.171922	0.12963	0.364865	0.247247	0	0	0		gain	-3.91167	-3.84425	-3.24731	-3.84425
chr1p36	STMN1	0	0	0	0.212963	0.121622	0.167292	0.138889	0.364865	0.251877	0	0	0		gain	-0.350504	-1.59887	-0.485302	-0.485302
chr1p36	PAFAH2	0	0	0	0.236111	0.103448	0.16978	0.180556	0.482759	0.331657	0	0	0		gain	-2.49326	-2.39334	-3.36738	-2.49326
chr1p36	EXTL1	0	0	0	0.211009	0.118421	0.164715	0.137615	0.381579	0.259597	0	0	0		gain	-1.77983	-1.27154	-0.0216378	-1.27154
chr1p36	SLC30A2	0	0	0	0.211009	0.118421	0.164715	0.137615	0.381579	0.259597	0	0	0		gain	0.506768	-2.08224	1.14717	0.506768
chr1p36	TRIM63	0	0	0	0.211009	0.118421	0.164715	0.137615	0.381579	0.259597	0	0	0		gain	1.80795	1.98496	1.72113	1.80795
chr1p36	PDIK1L	0	0	0	0.211009	0.118421	0.164715	0.137615	0.342105	0.23986	0	0	0		gain	-1.62812	-1.36745	-1.44885	-1.44885
chr1p36	FAM110D	0	0	0	0.236111	0.103448	0.16978	0.180556	0.482759	0.331657	0	0	0		gain	0.102275	NA	-0.749882	-0.323803
chr1p36	ZNF593	0	0	0	0.236111	0.103448	0.16978	0.180556	0.482759	0.331657	0	0	0		gain	-4.01804	-4.41243	-4.15888	-4.15888
chr1p36	CNKSR1	0	0	0	0.211009	0.118421	0.164715	0.137615	0.355263	0.246439	0	0	0		gain	-1.4119	0.132855	0.138382	0.132855
chr1p36	CATSPER4	0	0	0	0.205607	0.109589	0.157598	0.140187	0.356164	0.248176	0	0	0		gain	NA	-0.765646	-2.31074	-1.53819
chr1p36	CEP85	0	0	0	0.236111	0.103448	0.16978	0.180556	0.482759	0.331657	0	0	0		gain	0.895887	NA	-0.391361	0.252263
chr1p36	SH3BGRL3	0	0	0	0.236111	0.103448	0.16978	0.180556	0.482759	0.331657	0	0	0		gain	-9.92244	-6.72257	-6.86007	-6.86007
chr1p36	UBXN11	0	0	0	0.236111	0.103448	0.16978	0.180556	0.482759	0.331657	0	0	0		gain	-3.59998	-5.03455	-3.32132	-3.59998
chr1p36	CD52	0	0	0	0.236111	0.103448	0.16978	0.180556	0.482759	0.331657	0	0	0		gain	-0.126229	-1.12241	-0.491799	-0.491799
chr1p36	ZNF683	0	0	0	0.236111	0.137931	0.187021	0.180556	0.482759	0.331657	0	0	0		gain	-1.30399	-0.99884	-1.67654	-1.30399
chr1p36	LIN28A	0	0	0	0.221154	0.121622	0.171388	0.134615	0.378378	0.256497	0	0	0		gain	-1.02503	0.607925	-2.03565	-1.02503
chr1p36	DHDDS	0	0	0	0.221154	0.123288	0.172221	0.134615	0.369863	0.252239	0	0	0		gain	-0.989408	0.482234	-3.06124	-0.989408
chr1p36	HMGN2	0	0	0	0.192308	0.108108	0.150208	0.163462	0.310811	0.237136	0	0.0135135	0.00675675			1.61075	-1.53386	0.131415	0.131415
chr1p36	RPS6KA1	0	0	0	0.221154	0.121622	0.171388	0.134615	0.378378	0.256497	0	0	0		gain	-0.398453	-2.61918	-1.99864	-1.99864
chr1p36	ARID1A	0	0	0	0.25	0.103448	0.176724	0.180556	0.448276	0.314416	0	0	0		gain	-0.106327	1.69112	-2.84954	-0.106327
chr1p36	PIGV	0	0	0	0.25	0.103448	0.176724	0.180556	0.448276	0.314416	0	0	0		gain	2.36359	3.52502	2.09637	2.36359
chr1p36	ZDHHC18	0	0	0	0.222222	0.105263	0.163743	0.12963	0.355263	0.242446	0	0	0		gain	-0.238803	-2.50521	-0.385196	-0.385196
chr1p36	SFN	0	0	0	0.236111	0.103448	0.16978	0.180556	0.448276	0.314416	0	0	0		gain	-2.70052	0.257822	-0.642524	-0.642524
chr1p36	GPN2	0	0	0	0.220183	0.105263	0.162723	0.12844	0.355263	0.241852	0	0	0		gain	-2.72411	-2.40648	-2.8934	-2.72411
chr1p36	GPATCH3	0	0	0	0.220183	0.105263	0.162723	0.12844	0.355263	0.241852	0	0	0		gain	-4.5438	-2.02113	-1.49254	-2.02113
chr1p36	NR0B2	0	0	0	0.236111	0.103448	0.16978	0.180556	0.448276	0.314416	0	0	0		gain	-1.78137	1.90607	-2.18415	-1.78137
chr1p36	NUDC	0	0	0	0.220183	0.105263	0.162723	0.12844	0.368421	0.248431	0	0	0		gain	-0.0167234	-1.12285	-0.550154	-0.550154
chr1p36	TRNP1	0	0	0	0.201835	0.105263	0.153549	0.12844	0.368421	0.248431	0	0	0		gain	-1.12732	-0.423239	0.799521	-0.423239
chr1p36	SLC9A1	0	0	0	0.222222	0.103448	0.162835	0.180556	0.448276	0.314416	0	0	0		gain	-5.66907	-3.54345	-5.99605	-5.66907
chr1p36	WDTC1	0	0	0	0.225352	0.103448	0.1644	0.169014	0.448276	0.308645	0	0	0		gain	-0.0598815	3.59964	1.19947	1.19947
chr1p36	TMEM222	0	0	0	0.222222	0.107143	0.164683	0.166667	0.428571	0.297619	0	0	0		gain	-4.387	-1.85302	-2.76352	-2.76352
chr1p36	SYTL1	0	0	0	0.208333	0.103448	0.155891	0.166667	0.413793	0.29023	0	0.0344828	0.0172414			-0.566346	-2.19595	-0.312032	-0.566346
chr1p36	MAP3K6	0	0	0	0.208333	0.103448	0.155891	0.166667	0.413793	0.29023	0	0.0344828	0.0172414			2.33558	4.88384	0.571826	2.33558
chr1p36	FCN3	0	0	0	0.208333	0.103448	0.155891	0.166667	0.413793	0.29023	0	0.0344828	0.0172414			-1.57361	-1.56614	-1.35203	-1.56614
chr1p36	CD164L2	0	0	0	0.208333	0.103448	0.155891	0.166667	0.413793	0.29023	0	0.0344828	0.0172414			NA	1.2445	0.832293	1.0384
chr1p36	GPR3	0	0	0	0.208333	0.103448	0.155891	0.166667	0.413793	0.29023	0	0.0344828	0.0172414			0.490549	-3.19203	-2.9799	-2.9799
chr1p36	WASF2	0	0	0	0.208333	0.103448	0.155891	0.166667	0.413793	0.29023	0	0.0344828	0.0172414			0.719482	3.09491	-0.124648	0.719482
chr1p36	AHDC1	0	0	0	0.203704	0.105263	0.154483	0.111111	0.328947	0.220029	0	0	0		gain	0.899858	4.07361	0.961495	0.961495
chr1p36	FGR	0	0	0	0.203704	0.105263	0.154483	0.111111	0.328947	0.220029	0	0	0		gain	-2.85638	-2.0262	-1.30288	-2.0262
chr1p36	IFI6	0	0	0	0.208333	0.103448	0.155891	0.166667	0.448276	0.307471	0	0	0		gain	2.05303	0.44091	-0.476293	0.44091
chr1p35	FAM76A	0	0	0	0.203704	0.108108	0.155906	0.111111	0.351351	0.231231	0	0	0		gain	2.23	5.69632	1.56215	2.23
chr1p35	STX12	0	0	0	0.192661	0.105263	0.148962	0.119266	0.368421	0.243844	0	0	0		gain	2.92427	5.28375	3.42072	3.42072
chr1p35	PPP1R8	0	0	0	0.201835	0.105263	0.153549	0.119266	0.368421	0.243844	0	0	0		gain	-2.2733	-0.508432	-0.944335	-0.944335
chr1p35	THEMIS2	0	0	0	0.208333	0.103448	0.155891	0.166667	0.448276	0.307471	0	0	0		gain	-1.83258	NA	-5.11153	-3.47206
chr1p35	RPA2	0	0	0	0.201835	0.105263	0.153549	0.119266	0.315789	0.217528	0	0	0		gain	0.456031	0.331757	0.632799	0.456031
chr1p35	SMPDL3B	0	0	0	0.201835	0.105263	0.153549	0.119266	0.328947	0.224107	0	0	0		gain	-0.110843	0.866581	0.446004	0.446004
chr1p35	XKR8	0	0	0	0.208333	0.103448	0.155891	0.166667	0.448276	0.307471	0	0	0		gain	-5.83191	-4.88854	-2.27473	-4.88854
chr1p35	EYA3	0	0	0	0.208333	0.103448	0.155891	0.166667	0.448276	0.307471	0	0	0		gain	-4.05286	-2.90732	-3.40187	-3.40187
chr1p35	PTAFR	0	0	0	0.208333	0.103448	0.155891	0.166667	0.448276	0.307471	0	0	0		gain	-3.55368	-2.73399	-5.05799	-3.55368
chr1p35	DNAJC8	0	0	0	0.208333	0.103448	0.155891	0.166667	0.448276	0.307471	0	0	0		gain	-1.19926	-1.04784	-1.17358	-1.17358
chr1p35	SESN2	0	0	0	0.208333	0.103448	0.155891	0.166667	0.448276	0.307471	0	0	0		gain	-3.51821	-4.27542	-2.59615	-3.51821
chr1p35	MED18	0	0	0	0.208333	0.103448	0.155891	0.166667	0.448276	0.307471	0	0	0		gain	NA	0.0881307	0.369423	0.228777
chr1p35	PHACTR4	0	0	0	0.2	0.103448	0.151724	0.171429	0.448276	0.309852	0	0	0		gain	2.17518	2.33779	0.292983	2.17518
chr1p35	RCC1	0	0	0	0.194444	0.103448	0.148946	0.180556	0.448276	0.314416	0	0	0		gain	-3.7252	-3.08721	-4.20514	-3.7252
chr1p35	TRNAU1AP	0	0	0	0.194444	0.103448	0.148946	0.180556	0.448276	0.314416	0	0	0		gain	0.446037	2.20532	1.70064	1.70064
chr1p35	RAB42	0	0	0	0.180556	0.103448	0.142002	0.180556	0.448276	0.314416	0	0	0		gain	-3.44799	-0.804709	-3.84983	-3.44799
chr1p35	TAF12	0	0	0	0.180556	0.103448	0.142002	0.180556	0.448276	0.314416	0	0	0		gain	-3.28587	-2.25186	-3.03693	-3.03693
chr1p35	GMEB1	0	0	0	0.180556	0.103448	0.142002	0.180556	0.448276	0.314416	0	0	0		gain	-5.46331	-4.57489	-2.33061	-4.57489
chr1p35	YTHDF2	0	0	0	0.180556	0.103448	0.142002	0.180556	0.448276	0.314416	0	0	0		gain	-5.37697	-4.13442	-4.6119	-4.6119
chr1p35	OPRD1	0	0	0	0.175926	0.106667	0.141296	0.12963	0.373333	0.251481	0	0	0		gain	-1.62343	-2.17017	-1.35815	-1.62343
chr1p35	EPB41	0	0.0133333	0.00666666	0.166667	0.133333	0.15	0.12963	0.373333	0.251481	0	0	0		gain	5.84928	4.90963	3.34761	4.90963
chr1p35	TMEM200B	0	0	0	0.166667	0.178571	0.172619	0.180556	0.428571	0.304563	0	0	0			5.52383	5.60666	4.08165	5.52383
chr1p35	SRSF4	0	0	0	0.166667	0.172414	0.16954	0.180556	0.448276	0.314416	0	0	0		gain	1.78037	NA	1.27162	1.526
chr1p35	MECR	0	0	0	0.166667	0.172414	0.16954	0.180556	0.448276	0.314416	0	0	0		gain	-2.39531	-1.96868	-2.44204	-2.39531
chr1p35	PTPRU	0	0	0	0.166667	0.172414	0.16954	0.180556	0.448276	0.314416	0	0	0		gain	-1.41995	-1.01816	-0.423202	-1.01816
chr1p35	MATN1	0	0	0	0.138889	0.137931	0.13841	0.194444	0.448276	0.32136	0	0	0			-0.551648	0.441292	1.50939	0.441292
chr1p35	LAPTM5	0	0	0	0.138889	0.137931	0.13841	0.194444	0.448276	0.32136	0	0	0			-2.65837	-5.02162	-6.09969	-5.02162
chr1p35	SDC3	0	0	0	0.137615	0.118421	0.128018	0.137615	0.342105	0.23986	0	0.0131579	0.00657895		gain	1.892	2.62919	1.93793	1.93793
chr1p35	PUM1	0	0	0	0.138889	0.118421	0.128655	0.12963	0.342105	0.235867	0	0.0131579	0.00657895		gain	-2.55721	1.45541	0.531329	0.531329
chr1p35	NKAIN1	0	0	0	0.111111	0.137931	0.124521	0.194444	0.448276	0.32136	0	0	0			-1.63547	-1.91924	-0.922793	-1.63547
chr1p35	SNRNP40	0	0	0	0.111111	0.137931	0.124521	0.180556	0.448276	0.314416	0	0	0		gain	-0.271463	-3.79368	-1.80943	-1.80943
chr1p35	ZCCHC17	0	0	0	0.112676	0.137931	0.125304	0.183099	0.448276	0.315687	0	0	0		gain	-1.22071	-0.456546	0.432084	-0.456546
chr1p35	FABP3	0	0	0	0.111111	0.137931	0.124521	0.194444	0.448276	0.32136	0	0	0			2.78352	4.06566	2.64224	2.78352
chr1p35	SERINC2	0	0	0	0.12037	0.109589	0.11498	0.138889	0.342466	0.240677	0	0.0136986	0.00684931		gain	-1.36643	-6.06393	-2.47409	-2.47409
chr1p35	TINAGL1	0	0	0	0.111111	0.137931	0.124521	0.194444	0.448276	0.32136	0	0	0			2.04177	7.07757	5.98027	5.98027
chr1p35	HCRTR1	0	0	0	0.0972222	0.137931	0.117577	0.194444	0.448276	0.32136	0.0138889	0	0.00694444			-0.872901	5.19899	2.37109	2.37109
chr1p35	PEF1	0	0	0	0.0972222	0.137931	0.117577	0.194444	0.448276	0.32136	0.0138889	0	0.00694444			4.39285	1.28726	2.97966	2.97966
chr1p35	COL16A1	0	0	0	0.0985915	0.137931	0.118261	0.197183	0.448276	0.322729	0.0140845	0	0.00704225			-5.40086	-3.0754	-4.07272	-4.07272
chr1p35	SPOCD1	0	0	0	0.0972222	0.137931	0.117577	0.194444	0.448276	0.32136	0.0138889	0	0.00694444			3.88157	2.22922	1.6199	2.22922
chr1p35	PTP4A2	0	0	0	0.0972222	0.137931	0.117577	0.194444	0.482759	0.338602	0.0138889	0	0.00694444		gain	-1.6269	-1.67748	-1.11025	-1.6269
chr1p35	KHDRBS1	0	0	0	0.0972222	0.137931	0.117577	0.208333	0.448276	0.328305	0.0138889	0	0.00694444			-1.77214	-2.16936	-1.31156	-1.77214
chr1p35	TMEM39B	0	0	0	0.0972222	0.137931	0.117577	0.208333	0.448276	0.328305	0.0138889	0	0.00694444			-3.91916	-4.53748	-3.89386	-3.91916
chr1p35	KPNA6	0	0	0	0.0917431	0.135135	0.113439	0.146789	0.351351	0.24907	0.00917431	0	0.00458716		gain	0.691168	4.31743	1.18899	1.18899
chr1p35	TXLNA	0	0	0	0.100917	0.131579	0.116248	0.146789	0.342105	0.244447	0.00917431	0	0.00458716		gain	-1.73015	0.707482	-2.19162	-1.73015
chr1p35	CCDC28B	0	0	0	0.0972222	0.137931	0.117577	0.208333	0.448276	0.328305	0.0138889	0	0.00694444			-1.40456	-4.18797	0.907595	-1.40456
chr1p35	IQCC	0	0	0	0.0972222	0.137931	0.117577	0.208333	0.448276	0.328305	0.0138889	0	0.00694444			-0.490874	3.01024	0.801147	0.801147
chr1p35	DCDC2B	0	0	0	0.100917	0.131579	0.116248	0.146789	0.342105	0.244447	0.00917431	0	0.00458716		gain	-0.0261793	3.1832	0.150149	0.150149
chr1p35	TMEM234	0	0	0	0.0972222	0.137931	0.117577	0.208333	0.448276	0.328305	0.0138889	0	0.00694444			-6.59725	NA	-2.01223	-4.30474
chr1p35	EIF3I	0	0	0	0.100917	0.131579	0.116248	0.146789	0.342105	0.244447	0.00917431	0	0.00458716		gain	-3.478	-2.45632	-1.57085	-2.45632
chr1p35	FAM167B	0	0	0	0.0972222	0.137931	0.117577	0.208333	0.448276	0.328305	0.0138889	0	0.00694444			1.36805	1.11241	2.37119	1.36805
chr1p35	LCK	0	0	0	0.100917	0.131579	0.116248	0.146789	0.355263	0.251026	0.00917431	0	0.00458716		gain	0.754495	-0.57922	-0.702753	-0.57922
chr1p35	HDAC1	0	0	0	0.0925926	0.131579	0.112086	0.138889	0.355263	0.247076	0.00925926	0	0.00462963		gain	4.12646	0.1354	0.857123	0.857123
chr1p35	MARCKSL1	0	0	0	0.0972222	0.137931	0.117577	0.194444	0.482759	0.338602	0.0138889	0	0.00694444		gain	-1.95238	-3.29056	-4.8885	-3.29056
chr1p35	FAM229A	0	0	0	0.0972222	0.137931	0.117577	0.208333	0.482759	0.345546	0.0138889	0	0.00694444		gain	-0.565147	NA	1.1439	0.289377
chr1p35	TSSK3	0	0	0	0.0972222	0.137931	0.117577	0.208333	0.482759	0.345546	0.0138889	0	0.00694444		gain	-0.972654	4.78441	0.183122	0.183122
chr1p35	BSDC1	0	0	0	0.0917431	0.131579	0.111661	0.146789	0.342105	0.244447	0.00917431	0	0.00458716		gain	-1.19511	1.48906	-0.329819	-0.329819
chr1p35	ZBTB8A	0	0	0	0.0972222	0.137931	0.117577	0.208333	0.482759	0.345546	0.0138889	0	0.00694444		gain	3.86308	4.61872	0.965533	3.86308
chr1p35	ZBTB8B	0	0	0	0.0972222	0.137931	0.117577	0.208333	0.482759	0.345546	0.0138889	0	0.00694444		gain	-1.05888	6.63656	2.6147	2.6147
chr1p35	ZBTB8OS	0	0	0	0.0972222	0.137931	0.117577	0.208333	0.448276	0.328305	0.0138889	0	0.00694444			2.66655	-0.435566	0.998718	0.998718
chr1p35	RBBP4	0	0	0	0.0972222	0.137931	0.117577	0.208333	0.448276	0.328305	0.0138889	0	0.00694444			3.06043	2.71198	0.189655	2.71198
chr1p35	SYNC	0	0	0	0.0972222	0.137931	0.117577	0.208333	0.448276	0.328305	0.0138889	0	0.00694444			7.73278	3.12663	4.23702	4.23702
chr1p35	KIAA1522	0	0	0	0.0972222	0.137931	0.117577	0.208333	0.448276	0.328305	0.0138889	0	0.00694444			2.75999	3.29395	0.186665	2.75999
chr1p35	S100PBP	0	0	0	0.0833333	0.137931	0.110632	0.194444	0.448276	0.32136	0.0138889	0	0.00694444			2.33735	2.93831	-0.0892224	2.33735
chr1p35	FNDC5	0	0	0	0.084507	0.137931	0.111219	0.197183	0.448276	0.322729	0.0140845	0	0.00704225			-3.11925	-4.9374	-1.55028	-3.11925
chr1p35	HPCA	0	0	0	0.0833333	0.137931	0.110632	0.208333	0.448276	0.328305	0.0138889	0	0.00694444			2.09878	4.32495	3.22813	3.22813
chr1p35	TMEM54	0	0	0	0.0833333	0.137931	0.110632	0.208333	0.448276	0.328305	0.0138889	0	0.00694444			1.97262	2.10961	3.10118	2.10961
chr1p35	RNF19B	0	0	0	0.0833333	0.137931	0.110632	0.208333	0.448276	0.328305	0.0138889	0	0.00694444			-0.300099	0.0910276	-0.937491	-0.300099
chr1p35	AK2	0	0	0	0.0825688	0.146667	0.114618	0.146789	0.36	0.253394	0.00917431	0	0.00458716		gain	0.490941	-2.58525	-1.10076	-1.10076
chr1p35	TRIM62	0	0	0	0.0833333	0.137931	0.110632	0.208333	0.448276	0.328305	0.0138889	0	0.00694444			0.949873	1.74426	1.2987	1.2987
chr1p35	ZNF362	0	0	0	0.0694444	0.137931	0.103688	0.208333	0.448276	0.328305	0.0138889	0	0.00694444			-3.24836	-1.93255	-2.48091	-2.48091
chr1p35	A3GALT2	0	0	0	0.0704225	0.137931	0.104177	0.197183	0.448276	0.322729	0.0140845	0	0.00704225			NA	NA	-2.18438	-2.18438
chr1p35	PHC2	0	0	0	0.0704225	0.137931	0.104177	0.197183	0.448276	0.322729	0.0140845	0	0.00704225			-2.48262	-1.0688	-1.243	-1.243
chr1p35	ZSCAN20	0	0	0	0.0694444	0.137931	0.103688	0.166667	0.413793	0.29023	0.0138889	0	0.00694444			-0.274248	3.5497	0.220546	0.220546
chr1p35	CSMD2	0	0.0135135	0.00675675	0.0841121	0.148649	0.11638	0.158879	0.310811	0.234845	0.00934579	0.0135135	0.0114297			-4.0079	-0.10223	-1.4618	-1.4618
chr1p35	HMGB4	0	0	0	0.0694444	0.137931	0.103688	0.166667	0.413793	0.29023	0.0138889	0	0.00694444			-2.99669	-1	-1.77667	-1.77667
chr1p34	C1orf94	0	0	0	0.0769231	0.146667	0.111795	0.144231	0.306667	0.225449	0.00961538	0.0133333	0.0114744		gain	-0.382793	3.85747	2.75227	2.75227
chr1p34	GJB5	0	0	0	0.0733945	0.144737	0.109066	0.137615	0.328947	0.233281	0.00917431	0.0131579	0.0111661		gain	0.135869	0.991969	-1.22071	0.135869
chr1p34	GJB4	0	0	0	0.0642202	0.144737	0.104479	0.146789	0.328947	0.237868	0.00917431	0.0131579	0.0111661		gain	1.02503	0.205484	-1.25034	0.205484
chr1p34	GJB3	0	0	0	0.0642202	0.144737	0.104479	0.146789	0.328947	0.237868	0.00917431	0.0131579	0.0111661		gain	-2.21426	-0.931682	-1.66469	-1.66469
chr1p34	GJA4	0	0	0	0.0642202	0.144737	0.104479	0.137615	0.328947	0.233281	0.00917431	0.0131579	0.0111661		gain	-1.1036	0.167962	-3.05127	-1.1036
chr1p34	SMIM12	0	0	0	0.0694444	0.137931	0.103688	0.180556	0.413793	0.297174	0.0138889	0	0.00694444			3.86275	NA	1.61999	2.74137
chr1p34	DLGAP3	0	0	0	0.0555556	0.137931	0.0967433	0.194444	0.413793	0.304119	0.0138889	0	0.00694444			-2.37564	3.43517	2.13036	2.13036
chr1p34	ZMYM6	0	0	0	0.0555556	0.137931	0.0967433	0.180556	0.413793	0.297174	0.0138889	0	0.00694444			-0.98822	4.71761	1.21125	1.21125
chr1p34	ZMYM1	0	0	0	0.0555556	0.137931	0.0967433	0.180556	0.413793	0.297174	0.0138889	0	0.00694444			1.29828	3.96793	2.542	2.542
chr1p34	SFPQ	0	0	0	0.0555556	0.137931	0.0967433	0.194444	0.413793	0.304119	0.0138889	0	0.00694444			-0.199577	-4.0424	-3.31635	-3.31635
chr1p34	ZMYM4	0	0	0	0.0841121	0.169014	0.126563	0.140187	0.338028	0.239108	0.00934579	0	0.0046729		gain	-4.18418	-1.3018	-2.06035	-2.06035
chr1p34	KIAA0319L	0	0	0	0.0761905	0.166667	0.121429	0.133333	0.333333	0.233333	0.00952381	0	0.00476191		gain	-3.96778	-3.48506	-2.2795	-3.48506
chr1p34	NCDN	0	0	0	0.0416667	0.137931	0.0897988	0.208333	0.413793	0.311063	0.0138889	0	0.00694444			-3.45361	-2.2325	-4.10507	-3.45361
chr1p34	PSMB2	0	0	0	0.0416667	0.137931	0.0897988	0.194444	0.413793	0.304119	0.0138889	0	0.00694444			-1.43047	-2.71947	-1.96055	-1.96055
chr1p34	TFAP2E	0	0	0	0.0422535	0.137931	0.0900923	0.197183	0.413793	0.305488	0.0140845	0	0.00704225			-1.73038	0.208996	-1.28946	-1.28946
chr1p34	C1orf216	0	0	0	0.0416667	0.137931	0.0897988	0.208333	0.413793	0.311063	0.0138889	0	0.00694444			0.726365	1.95696	1.13516	1.13516
chr1p34	CLSPN	0	0	0	0.0416667	0.137931	0.0897988	0.208333	0.413793	0.311063	0.0138889	0	0.00694444			1.37262	1.69874	-0.39074	1.37262
chr1p34	AGO4	0	0	0	0.0416667	0.137931	0.0897988	0.208333	0.413793	0.311063	0.0138889	0	0.00694444			1.12747	NA	2.88031	2.00389
chr1p34	AGO1	0	0	0	0.0416667	0.137931	0.0897988	0.208333	0.413793	0.311063	0.0138889	0	0.00694444			0.204721	NA	-1.03493	-0.415102
chr1p34	AGO3	0	0	0	0.0422535	0.137931	0.0900923	0.197183	0.413793	0.305488	0.0140845	0	0.00704225			-0.119141	NA	1.01501	0.447936
chr1p34	TEKT2	0	0	0	0.0416667	0.137931	0.0897988	0.222222	0.413793	0.318008	0.0138889	0	0.00694444			-1.50626	-0.974614	-1.62681	-1.50626
chr1p34	ADPRHL2	0	0	0	0.0416667	0.137931	0.0897988	0.222222	0.413793	0.318008	0.0138889	0	0.00694444			1.63445	0.325822	1.16077	1.16077
chr1p34	COL8A2	0	0	0	0.0416667	0.137931	0.0897988	0.222222	0.413793	0.318008	0.0138889	0	0.00694444			3.61279	1.55585	0.17697	1.55585
chr1p34	TRAPPC3	0	0	0	0.0416667	0.137931	0.0897988	0.222222	0.413793	0.318008	0.0138889	0	0.00694444			2.80978	2.29733	5.80291	2.80978
chr1p34	MAP7D1	0	0	0	0.0416667	0.137931	0.0897988	0.222222	0.413793	0.318008	0.0138889	0	0.00694444			0.897767	1.24362	1.12445	1.12445
chr1p34	THRAP3	0	0	0	0.0416667	0.137931	0.0897988	0.222222	0.413793	0.318008	0.0138889	0	0.00694444			-1.29189	2.82102	0.342822	0.342822
chr1p34	SH3D21	0	0	0	0.0416667	0.137931	0.0897988	0.222222	0.413793	0.318008	0.0138889	0	0.00694444			-1.10392	NA	0.668255	-0.217831
chr1p34	EVA1B	0	0	0	0.0416667	0.137931	0.0897988	0.222222	0.413793	0.318008	0.0138889	0	0.00694444			-6.22665	NA	-2.0487	-4.13768
chr1p34	STK40	0	0	0	0.0416667	0.137931	0.0897988	0.222222	0.413793	0.318008	0.0138889	0	0.00694444			-3.33137	-0.504468	0.89854	-0.504468
chr1p34	LSM10	0	0	0	0.0416667	0.137931	0.0897988	0.222222	0.413793	0.318008	0.0138889	0	0.00694444			-2.3036	-2.07745	-1.28635	-2.07745
chr1p34	OSCP1	0	0	0	0.0422535	0.137931	0.0900923	0.225352	0.413793	0.319573	0.0140845	0	0.00704225			0.520212	-1.3262	-3.57187	-1.3262
chr1p34	MRPS15	0	0	0	0.0416667	0.137931	0.0897988	0.236111	0.413793	0.324952	0.0138889	0	0.00694444			-0.416188	-1.55457	-0.578615	-0.578615
chr1p34	CSF3R	0	0	0	0.0416667	0.137931	0.0897988	0.236111	0.413793	0.324952	0.0138889	0	0.00694444			-2.96154	-4.39053	-3.30133	-3.30133
chr1p34	GRIK3	0	0	0	0.0660377	0.144737	0.105387	0.179245	0.302632	0.240938	0.00943396	0.0263158	0.0178749			-2.39382	-1.13401	-2.39329	-2.39329
chr1p34	ZC3H12A	0	0	0	0.0416667	0.137931	0.0897988	0.236111	0.413793	0.324952	0.0138889	0	0.00694444			0.452847	1.96627	1.14339	1.14339
chr1p34	MEAF6	0	0	0	0.0416667	0.137931	0.0897988	0.236111	0.413793	0.324952	0.0138889	0	0.00694444			2.11244	3.76751	4.10712	3.76751
chr1p34	SNIP1	0	0	0	0.0416667	0.137931	0.0897988	0.236111	0.413793	0.324952	0.0138889	0	0.00694444			-0.0654705	2.69817	1.58396	1.58396
chr1p34	DNALI1	0	0	0	0.0416667	0.137931	0.0897988	0.236111	0.413793	0.324952	0.0138889	0	0.00694444			-0.50358	-0.00916767	1.53544	-0.00916767
chr1p34	GNL2	0	0	0	0.0416667	0.137931	0.0897988	0.236111	0.413793	0.324952	0.0138889	0	0.00694444			-0.22519	-1.30395	-2.05813	-1.30395
chr1p34	RSPO1	0	0	0	0.0416667	0.137931	0.0897988	0.236111	0.413793	0.324952	0.0138889	0	0.00694444			-2.26921	4.30571	2.28542	2.28542
chr1p34	C1orf109	0	0	0	0.0416667	0.137931	0.0897988	0.236111	0.37931	0.307711	0.0138889	0	0.00694444			-0.396461	2.15634	0.927062	0.927062
chr1p34	CDCA8	0	0	0	0.0416667	0.137931	0.0897988	0.236111	0.37931	0.307711	0.0138889	0	0.00694444			-0.330986	-2.11724	-1.0159	-1.0159
chr1p34	EPHA10	0	0	0	0.0416667	0.137931	0.0897988	0.236111	0.37931	0.307711	0.0138889	0	0.00694444			-1.04799	3.70045	0.722241	0.722241
chr1p34	MANEAL	0	0	0	0.0416667	0.137931	0.0897988	0.236111	0.37931	0.307711	0.0138889	0	0.00694444			5.31593	3.52199	2.25605	3.52199
chr1p34	YRDC	0	0	0	0.0416667	0.137931	0.0897988	0.236111	0.37931	0.307711	0.0138889	0	0.00694444			-4.08145	-4.01724	-2.09624	-4.01724
chr1p34	C1orf122	0	0	0	0.0416667	0.137931	0.0897988	0.236111	0.37931	0.307711	0.0138889	0	0.00694444			0.637578	-0.354344	0.672459	0.637578
chr1p34	MTF1	0	0	0	0.0416667	0.137931	0.0897988	0.236111	0.37931	0.307711	0.0138889	0	0.00694444			-3.75312	0.974273	-1.88089	-1.88089
chr1p34	INPP5B	0	0	0	0.0416667	0.137931	0.0897988	0.236111	0.37931	0.307711	0.0138889	0	0.00694444			2.42764	7.26815	5.63843	5.63843
chr1p34	SF3A3	0	0	0	0.0416667	0.137931	0.0897988	0.236111	0.37931	0.307711	0.0138889	0	0.00694444			1.96508	0.314718	1.09206	1.09206
chr1p34	FHL3	0	0	0	0.0416667	0.137931	0.0897988	0.236111	0.37931	0.307711	0.0138889	0	0.00694444			3.50945	1.59639	2.49715	2.49715
chr1p34	POU3F1	0	0	0	0.0416667	0.137931	0.0897988	0.236111	0.37931	0.307711	0.0138889	0	0.00694444			-0.264424	2.26076	4.14634	2.26076
chr1p34	RRAGC	0	0	0	0.0660377	0.135135	0.100586	0.160377	0.27027	0.215324	0.00943396	0.0135135	0.0114737			-0.0889436	2.35696	-1.1834	-0.0889436
chr1p34	MYCBP	0	0	0	0.0660377	0.135135	0.100586	0.160377	0.27027	0.215324	0.00943396	0.0135135	0.0114737			NA	-1.1619	1.55053	0.194316
chr1p34	RHBDL2	0	0	0	0.0660377	0.135135	0.100586	0.160377	0.283784	0.222081	0.00943396	0.0135135	0.0114737			-1.15104	-1.9465	-2.91803	-1.9465
chr1p34	AKIRIN1	0	0	0	0.0416667	0.137931	0.0897988	0.222222	0.37931	0.300766	0.0138889	0	0.00694444			0.0694698	0.301021	3.348	0.301021
chr1p34	NDUFS5	0	0	0	0.0416667	0.137931	0.0897988	0.222222	0.37931	0.300766	0.0138889	0	0.00694444			1.39981	-0.25258	4.33896	1.39981
chr1p34	MACF1	0.0138889	0	0.00694444	0.0416667	0.137931	0.0897988	0.222222	0.37931	0.300766	0.0277778	0	0.0138889			10.988	10.1935	8.89643	10.1935
chr1p34	KIAA0754	0	0	0	0.0416667	0.137931	0.0897988	0.222222	0.37931	0.300766	0.0138889	0	0.00694444			8.58593	1.4286	3.89283	3.89283
chr1p34	BMP8A	0	0	0	0.046875	0.137931	0.092403	0.234375	0.37931	0.306843	0.03125	0	0.015625			-1.38392	-1.38684	-2.0933	-1.38684
chr1p34	PABPC4	0.0138889	0	0.00694444	0.0416667	0.137931	0.0897988	0.25	0.37931	0.314655	0.0277778	0	0.0138889			-4.47606	-4.10511	-1.78953	-4.10511
chr1p34	HEYL	0.0138889	0	0.00694444	0.0416667	0.137931	0.0897988	0.25	0.37931	0.314655	0.0138889	0	0.00694444			-1.29488	-1.72182	-1.92045	-1.72182
chr1p34	NT5C1A	0.0138889	0	0.00694444	0.0416667	0.137931	0.0897988	0.25	0.37931	0.314655	0.0138889	0	0.00694444			-0.840152	0.0550951	2.31909	0.0550951
chr1p34	HPCAL4	0.0138889	0	0.00694444	0.0416667	0.137931	0.0897988	0.25	0.37931	0.314655	0.0138889	0	0.00694444			-1.39117	-0.439041	2.54082	-0.439041
chr1p34	PPIE	0.00970874	0	0.00485437	0.0582524	0.16	0.109126	0.194175	0.293333	0.243754	0.00970874	0.0266667	0.0181877			1.18911	0.343781	2.86744	1.18911
chr1p34	BMP8B	0	0	0	0.0693069	0.166667	0.117987	0.207921	0.291667	0.249794	0.00990099	0.0138889	0.0118949			-2.82348	-1.04734	-0.0456753	-1.04734
chr1p34	OXCT2	0	0	0	0.0555556	0.142857	0.0992063	0.263889	0.392857	0.328373	0.0138889	0	0.00694444			0.152556	1.41376	2.10116	1.41376
chr1p34	TRIT1	0	0	0	0.0673077	0.16	0.113654	0.192308	0.28	0.236154	0.00961538	0.0133333	0.0114744			0.529615	0.361687	1.06539	0.529615
chr1p34	MYCL	0	0	0	0.0555556	0.137931	0.0967433	0.25	0.413793	0.331897	0.0138889	0	0.00694444			NA	NA	-0.657647	-0.657647
chr1p34	MFSD2A	0	0	0	0.0555556	0.137931	0.0967433	0.25	0.413793	0.331897	0.0138889	0	0.00694444			-2.96552	-2.13923	-4.94332	-2.96552
chr1p34	CAP1	0	0	0	0.0740741	0.144737	0.109405	0.166667	0.276316	0.221491	0.00925926	0.0131579	0.0112086			4.56579	2.96967	3.46625	3.46625
chr1p34	PPT1	0	0	0	0.0747664	0.144737	0.109752	0.158879	0.276316	0.217597	0.00934579	0.0131579	0.0112518			0.469915	1.00369	-0.0787644	0.469915
chr1p34	RLF	0	0	0	0.0733945	0.144737	0.109066	0.155963	0.289474	0.222718	0.00917431	0.0131579	0.0111661			1.37524	2.74867	2.91495	2.74867
chr1p34	TMCO2	0	0	0	0.0733945	0.144737	0.109066	0.155963	0.302632	0.229297	0.00917431	0.0131579	0.0111661			-0.893796	-0.316907	-1.00403	-0.893796
chr1p34	ZMPSTE24	0	0	0	0.0733945	0.144737	0.109066	0.155963	0.302632	0.229297	0.00917431	0.0131579	0.0111661			-1.63571	0.133695	-1.22029	-1.22029
chr1p34	COL9A2	0	0	0	0.0733945	0.144737	0.109066	0.174312	0.302632	0.238472	0.00917431	0.0131579	0.0111661			2.70588	1.33796	2.07447	2.07447
chr1p34	SMAP2	0	0	0	0.0733945	0.146667	0.110031	0.155963	0.306667	0.231315	0.00917431	0.0133333	0.0112538			-0.542669	-1.49457	-1.14777	-1.14777
chr1p34	ZFP69B	0	0	0	0.0555556	0.137931	0.0967433	0.222222	0.413793	0.318008	0.0138889	0	0.00694444			-1.52946	NA	-2.34041	-1.93493
chr1p34	ZFP69	0	0	0	0.0555556	0.137931	0.0967433	0.222222	0.413793	0.318008	0.0138889	0	0.00694444			-1.65126	NA	0.425041	-0.613109
chr1p34	EXO5	0	0	0	0.0555556	0.137931	0.0967433	0.222222	0.413793	0.318008	0.0138889	0	0.00694444			2.53403	NA	1.86838	2.20121
chr1p34	ZNF684	0	0	0	0.0555556	0.137931	0.0967433	0.222222	0.413793	0.318008	0.0138889	0	0.00694444			-0.662009	2.5656	1.65001	1.65001
chr1p34	RIMS3	0	0	0	0.0555556	0.137931	0.0967433	0.25	0.413793	0.331897	0.0138889	0	0.00694444			17.9405	11.413	11.3975	11.413
chr1p34	NFYC	0	0	0	0.056338	0.103448	0.0798932	0.225352	0.37931	0.302331	0.0140845	0	0.00704225			2.6976	3.33289	6.47861	3.33289
chr1p34	KCNQ4	0	0	0	0.0555556	0.103448	0.0795019	0.25	0.37931	0.314655	0.0138889	0	0.00694444			10.3825	10.1929	11.2206	10.3825
chr1p34	CITED4	0	0	0	0.0555556	0.103448	0.0795019	0.25	0.37931	0.314655	0.0138889	0	0.00694444			-1.16507	4.09043	3.41242	3.41242
chr1p34	CTPS1	0	0	0	0.0555556	0.103448	0.0795019	0.25	0.37931	0.314655	0.0138889	0	0.00694444			6.60288	NA	3.56559	5.08424
chr1p34	SLFNL1	0	0	0	0.056338	0.103448	0.0798932	0.239437	0.37931	0.309373	0.0140845	0	0.00704225			0.0537461	4.72607	3.04312	3.04312
chr1p34	SCMH1	0	0	0	0.0841121	0.12	0.102056	0.149533	0.293333	0.221433	0.00934579	0.0133333	0.0113396			4.54118	8.15683	5.14454	5.14454
chr1p34	EDN2	0	0	0	0.0555556	0.103448	0.0795019	0.25	0.37931	0.314655	0.0138889	0	0.00694444			-1.51059	1.29162	1.21863	1.21863
chr1p34	HIVEP3	0	0	0	0.0555556	0.137931	0.0967433	0.25	0.37931	0.314655	0.0138889	0	0.00694444			-1.46193	-0.701373	-2.24155	-1.46193
chr1p34	GUCA2B	0	0	0	0.0694444	0.137931	0.103688	0.222222	0.37931	0.300766	0.0138889	0	0.00694444			0.988188	-0.477755	-1.12758	-0.477755
chr1p34	GUCA2A	0	0	0	0.0694444	0.137931	0.103688	0.222222	0.37931	0.300766	0.0138889	0	0.00694444			-1.50412	0.175108	-0.544989	-0.544989
chr1p34	FOXJ3	0	0	0	0.0704225	0.142857	0.10664	0.211268	0.392857	0.302062	0.0140845	0	0.00704225			-1.79695	2.48847	1.21291	1.21291
chr1p34	RIMKLA	0	0	0	0.0555556	0.137931	0.0967433	0.208333	0.37931	0.293822	0.0138889	0	0.00694444			2.63722	4.76597	6.21698	4.76597
chr1p34	ZMYND12	0	0	0	0.0747664	0.131579	0.103173	0.149533	0.276316	0.212924	0.00934579	0.0131579	0.0112518			-1.15526	2.63444	2.03503	2.03503
chr1p34	PPCS	0	0	0	0.0555556	0.137931	0.0967433	0.208333	0.37931	0.293822	0.0138889	0	0.00694444			-1.02926	0.529008	1.86607	0.529008
chr1p34	CCDC30	0	0	0	0.0747664	0.131579	0.103173	0.158879	0.302632	0.230755	0.00934579	0.0131579	0.0112518			-1.67404	2.33598	0.648869	0.648869
chr1p34	PPIH	0	0	0	0.0555556	0.142857	0.0992063	0.208333	0.392857	0.300595	0.0138889	0	0.00694444			-3.09813	-2.48061	-0.676123	-2.48061
chr1p34	YBX1	0	0	0	0.0555556	0.137931	0.0967433	0.208333	0.413793	0.311063	0.0138889	0	0.00694444			0.210361	-0.773221	0.0659506	0.0659506
chr1p34	CLDN19	0	0	0	0.0555556	0.137931	0.0967433	0.236111	0.413793	0.324952	0.0138889	0	0.00694444			-1.77118	-0.596263	0.11412	-0.596263
chr1p34	C1orf50	0	0	0	0.0555556	0.137931	0.0967433	0.222222	0.413793	0.318008	0.0138889	0	0.00694444			-3.81683	-2.18076	0.296797	-2.18076
chr1p34	ERMAP	0	0	0	0.0555556	0.137931	0.0967433	0.208333	0.413793	0.311063	0.0138889	0	0.00694444			-4.63436	-3.78519	-1.85301	-3.78519
chr1p34	ZNF691	0	0	0	0.0555556	0.137931	0.0967433	0.208333	0.413793	0.311063	0.0138889	0	0.00694444			3.15916	4.4312	4.06606	4.06606
chr1p34	SLC2A1	0	0	0	0.0555556	0.137931	0.0967433	0.236111	0.413793	0.324952	0.0138889	0	0.00694444			-2.5266	-1.43654	-1.29533	-1.43654
chr1p34	FAM183A	0	0	0	0.0555556	0.137931	0.0967433	0.208333	0.413793	0.311063	0.0138889	0	0.00694444			NA	0.0764439	-0.554496	-0.239026
chr1p34	EBNA1BP2	0	0	0	0.0673077	0.148649	0.107978	0.153846	0.297297	0.225572	0.00961538	0.0135135	0.0115644			-1.6726	-1.9033	-0.726061	-1.6726
chr1p34	TMEM125	0	0	0	0.0673077	0.148649	0.107978	0.173077	0.297297	0.235187	0.00961538	0.0135135	0.0115644			-1.35933	-0.00668512	0.415749	-0.00668512
chr1p34	C1orf210	0	0	0	0.0673077	0.148649	0.107978	0.173077	0.297297	0.235187	0.00961538	0.0135135	0.0115644			-2.69423	2.21306	-0.62652	-0.62652
chr1p34	TIE1	0	0	0	0.0673077	0.148649	0.107978	0.173077	0.297297	0.235187	0.00961538	0.0135135	0.0115644			-4.01004	-0.397442	-5.41363	-4.01004
chr1p34	MPL	0	0	0	0.0673077	0.148649	0.107978	0.173077	0.297297	0.235187	0.00961538	0.0135135	0.0115644			1.79044	8.50341	1.93067	1.93067
chr1p34	CDC20	0	0	0	0.0673077	0.148649	0.107978	0.173077	0.297297	0.235187	0.00961538	0.0135135	0.0115644			1.20966	-2.85144	-1.55125	-1.55125
chr1p34	ELOVL1	0	0	0	0.0555556	0.137931	0.0967433	0.236111	0.413793	0.324952	0.0138889	0	0.00694444			-3.01239	-1.62706	-1.87739	-1.87739
chr1p34	MED8	0	0	0	0.0555556	0.137931	0.0967433	0.236111	0.413793	0.324952	0.0138889	0	0.00694444			-4.0126	-2.25353	-2.37739	-2.37739
chr1p34	SZT2	0	0	0	0.0555556	0.137931	0.0967433	0.236111	0.413793	0.324952	0.0138889	0	0.00694444			-2.8034	NA	-0.370653	-1.58703
chr1p34	HYI	0	0	0	0.0555556	0.137931	0.0967433	0.236111	0.413793	0.324952	0.0138889	0	0.00694444			4.1649	1.55943	5.56001	4.1649
chr1p34	PTPRF	0	0	0	0.0555556	0.137931	0.0967433	0.236111	0.413793	0.324952	0.0138889	0	0.00694444			9.29376	5.46092	4.97208	5.46092
chr1p34	KDM4A	0	0	0	0.0648148	0.131579	0.0981969	0.166667	0.302632	0.234649	0.00925926	0.0131579	0.0112086			-6.09709	-3.22427	-5.78463	-5.78463
chr1p34	ST3GAL3	0	0	0	0.0660377	0.131579	0.0988083	0.160377	0.302632	0.231504	0.0188679	0.0131579	0.0160129			0.00489705	1.53868	3.00833	1.53868
chr1p34	ARTN	0	0	0	0.0555556	0.137931	0.0967433	0.236111	0.413793	0.324952	0.0138889	0	0.00694444			1.8082	6.00475	4.62954	4.62954
chr1p34	IPO13	0	0	0	0.0555556	0.137931	0.0967433	0.236111	0.413793	0.324952	0.0138889	0	0.00694444			1.16938	0.468119	0.307628	0.468119
chr1p34	DPH2	0	0	0	0.0555556	0.137931	0.0967433	0.236111	0.413793	0.324952	0.0138889	0	0.00694444			-2.39834	-1.92726	-2.35488	-2.35488
chr1p34	ATP6V0B	0	0	0	0.0555556	0.137931	0.0967433	0.236111	0.413793	0.324952	0.0138889	0	0.00694444			-4.32096	-2.60315	-3.41584	-3.41584
chr1p34	B4GALT2	0	0	0	0.0555556	0.137931	0.0967433	0.236111	0.413793	0.324952	0.0138889	0	0.00694444			-2.78355	-1.54178	-1.62907	-1.62907
chr1p34	SLC6A9	0	0	0	0.0555556	0.142857	0.0992063	0.236111	0.464286	0.350198	0.0138889	0	0.00694444			0.507611	3.24276	3.426	3.24276
chr1p34	CCDC24	0	0	0	0.0555556	0.142857	0.0992063	0.236111	0.428571	0.332341	0.0138889	0	0.00694444			6.29349	7.83798	6.24172	6.29349
chr1p34	KLF17	0	0	0	0.0555556	0.137931	0.0967433	0.222222	0.482759	0.35249	0.0138889	0	0.00694444			0.635149	9.08897	6.06031	6.06031
chr1p34	DMAP1	0	0	0	0.056338	0.137931	0.0971345	0.225352	0.482759	0.354055	0.0140845	0	0.00704225			-5.67198	-3.09371	0.0572004	-3.09371
chr1p34	ERI3	0	0	0	0.057971	0.137931	0.097951	0.217391	0.482759	0.350075	0.0144928	0	0.00724638		gain	-1.66106	-0.615407	-0.974993	-0.974993
chr1p34	RNF220	0	0	0	0.057971	0.137931	0.097951	0.217391	0.482759	0.350075	0.0144928	0	0.00724638		gain	-0.429841	0.473979	0.555505	0.473979
chr1p34	TMEM53	0	0	0	0.0694444	0.137931	0.103688	0.236111	0.482759	0.359435	0.0138889	0	0.00694444			-3.94857	-4.84259	-3.7672	-3.94857
chr1p34	KIF2C	0	0	0	0.0694444	0.137931	0.103688	0.236111	0.482759	0.359435	0.0138889	0	0.00694444			0.288706	-2.42968	-2.08299	-2.08299
chr1p34	RPS8	0	0	0	0.0694444	0.137931	0.103688	0.236111	0.482759	0.359435	0.0138889	0	0.00694444			-2.58809	-2.30005	0.385363	-2.30005
chr1p34	BEST4	0	0	0	0.0694444	0.137931	0.103688	0.236111	0.482759	0.359435	0.0138889	0	0.00694444			0.38687	0.817709	-0.1892	0.38687
chr1p34	PLK3	0	0	0	0.0555556	0.137931	0.0967433	0.25	0.482759	0.366379	0.0138889	0	0.00694444			-5.26083	-4.84806	-4.54612	-4.84806
chr1p34	TCTEX1D4	0	0	0	0.0555556	0.137931	0.0967433	0.25	0.482759	0.366379	0.0138889	0	0.00694444			NA	0.510299	-4.42607	-1.95789
chr1p34	BTBD19	0	0	0	0.0555556	0.137931	0.0967433	0.25	0.482759	0.366379	0.0138889	0	0.00694444			-5.74378	0.045989	-3.31948	-3.31948
chr1p34	PTCH2	0	0	0	0.0555556	0.137931	0.0967433	0.25	0.482759	0.366379	0.0138889	0	0.00694444			-2.02142	1.88218	-1.16498	-1.16498
chr1p34	EIF2B3	0	0	0	0.056338	0.142857	0.0995976	0.225352	0.464286	0.344819	0.0140845	0	0.00704225			-3.11296	-2.35134	-2.43433	-2.43433
chr1p34	HECTD3	0	0	0	0.0555556	0.137931	0.0967433	0.236111	0.448276	0.342193	0.0138889	0	0.00694444			-2.58231	1.21034	-2.33951	-2.33951
chr1p34	UROD	0	0	0	0.056338	0.137931	0.0971345	0.225352	0.448276	0.336814	0.0140845	0	0.00704225			-0.424162	1.23994	1.24686	1.23994
chr1p34	ZSWIM5	0	0	0	0.056338	0.137931	0.0971345	0.211268	0.448276	0.329772	0.0140845	0	0.00704225			-1.16878	2.1045	-1.56792	-1.16878
chr1p34	HPDL	0	0	0	0.0694444	0.137931	0.103688	0.222222	0.448276	0.335249	0.0138889	0	0.00694444			-1.09792	-4.11909	-2.65074	-2.65074
chr1p34	MUTYH	0	0	0	0.0825688	0.144737	0.113653	0.155963	0.315789	0.235876	0.00917431	0	0.00458716		gain	0.858881	3.10838	1.71896	1.71896
chr1p34	TOE1	0	0	0	0.0694444	0.137931	0.103688	0.222222	0.448276	0.335249	0.0138889	0	0.00694444			2.93677	4.82488	2.25061	2.93677
chr1p34	TESK2	0	0	0	0.0825688	0.144737	0.113653	0.146789	0.315789	0.231289	0.0183486	0	0.00917431		gain	4.45694	6.75859	2.52017	4.45694
chr1p34	MMACHC	0	0	0	0.0694444	0.137931	0.103688	0.208333	0.448276	0.328305	0.0277778	0	0.0138889			0.256714	1.38847	-0.0210908	0.256714
chr1p34	PRDX1	0	0	0	0.0694444	0.137931	0.103688	0.208333	0.448276	0.328305	0.0277778	0	0.0138889			-5.25132	-3.43983	-2.2744	-3.43983
chr1p34	AKR1A1	0	0	0	0.0694444	0.137931	0.103688	0.208333	0.448276	0.328305	0.0277778	0	0.0138889			-2.95395	-3.02467	-4.10225	-3.02467
chr1p34	NASP	0	0	0	0.0694444	0.137931	0.103688	0.208333	0.448276	0.328305	0.0277778	0	0.0138889			2.73098	1.73723	0.0320704	1.73723
chr1p34	CCDC17	0	0	0	0.0694444	0.137931	0.103688	0.208333	0.448276	0.328305	0.0277778	0	0.0138889			-0.967981	2.17347	0.313156	0.313156
chr1p34	GPBP1L1	0	0	0	0.0694444	0.137931	0.103688	0.208333	0.448276	0.328305	0.0277778	0	0.0138889			-1.6173	0.330085	-0.126456	-0.126456
chr1p34	TMEM69	0	0	0	0.0694444	0.137931	0.103688	0.208333	0.448276	0.328305	0.0277778	0	0.0138889			-0.917376	0.564782	-1.9826	-0.917376
chr1p34	IPP	0	0	0	0.0724638	0.142857	0.10766	0.202899	0.428571	0.315735	0.0289855	0	0.0144928			1.41275	3.27457	1.91222	1.91222
chr1p34	MAST2	0	0	0	0.0704225	0.137931	0.104177	0.197183	0.448276	0.322729	0.0140845	0	0.00704225			0.632811	2.62355	0.804493	0.804493
chr1p34	PIK3R3	0	0	0	0.0833333	0.131579	0.107456	0.138889	0.315789	0.227339	0.00925926	0	0.00462963		gain	4.8906	3.40907	1.53356	3.40907
chr1p34	TSPAN1	0	0	0	0.0825688	0.131579	0.107074	0.137615	0.328947	0.233281	0.00917431	0	0.00458716		gain	-1.09033	2.18852	1.68316	1.68316
chr1p34	POMGNT1	0	0	0	0.0825688	0.131579	0.107074	0.137615	0.328947	0.233281	0.00917431	0	0.00458716		gain	-0.22157	-1.05509	-0.491795	-0.491795
chr1p34	LURAP1	0	0	0	0.0694444	0.137931	0.103688	0.194444	0.448276	0.32136	0.0138889	0	0.00694444			0.0764877	NA	4.34675	2.21162
chr1p34	RAD54L	0	0	0	0.0825688	0.131579	0.107074	0.137615	0.342105	0.23986	0.00917431	0	0.00458716		gain	0.260345	-0.666614	-1.3808	-0.666614
chr1p34	LRRC41	0	0	0	0.0825688	0.131579	0.107074	0.137615	0.342105	0.23986	0.00917431	0	0.00458716		gain	-4.24958	-1.58642	-2.98309	-2.98309
chr1p34	UQCRH	0	0	0	0.155963	0.131579	0.143771	0.137615	0.342105	0.23986	0.00917431	0	0.00458716		gain	0.338706	-0.537168	1.55494	0.338706
chr1p33	NSUN4	0	0	0	0.0917431	0.135135	0.113439	0.137615	0.324324	0.230969	0.00917431	0	0.00458716		gain	-1.89548	-0.287286	-2.18876	-1.89548
chr1p33	FAAH	0	0	0	0.0825688	0.135135	0.108852	0.146789	0.324324	0.235557	0.00917431	0	0.00458716		gain	-0.994695	2.96047	0.354114	0.354114
chr1p33	DMBX1	0	0	0	0.0694444	0.137931	0.103688	0.208333	0.482759	0.345546	0.0138889	0	0.00694444		gain	-1.05433	-0.503918	-1.28897	-1.05433
chr1p33	KNCN	0	0	0	0.0694444	0.137931	0.103688	0.208333	0.482759	0.345546	0.0138889	0	0.00694444		gain	-1.33154	-1.18314	0.0128075	-1.18314
chr1p33	MKNK1	0	0	0	0.0776699	0.121622	0.0996458	0.15534	0.364865	0.260102	0.00970874	0	0.00485437		gain	-1.77416	1.79115	-1.05369	-1.05369
chr1p33	MOB3C	0	0	0	0.0694444	0.137931	0.103688	0.194444	0.482759	0.338602	0.0138889	0	0.00694444		gain	-2.47539	NA	-0.642508	-1.55895
chr1p33	ATPAF1	0	0.0135135	0.00675675	0.0769231	0.121622	0.0992723	0.144231	0.364865	0.254548	0.00961538	0	0.00480769		gain	8.11651	5.04788	5.46231	5.46231
chr1p33	EFCAB14	0	0	0	0.0694444	0.137931	0.103688	0.180556	0.482759	0.331657	0.0138889	0	0.00694444		gain	-0.755407	NA	-0.922856	-0.839131
chr1p33	TEX38	0	0	0	0.0694444	0.137931	0.103688	0.180556	0.482759	0.331657	0.0138889	0	0.00694444		gain	-0.491428	NA	-0.650782	-0.571105
chr1p33	CYP4B1	0	0	0	0.0694444	0.137931	0.103688	0.180556	0.482759	0.331657	0.0138889	0	0.00694444		gain	-2.89085	4.6771	-0.465951	-0.465951
chr1p33	CYP4A11	0	0	0	0.0825688	0.144737	0.113653	0.137615	0.342105	0.23986	0.00917431	0	0.00458716		gain	-0.281987	-0.0882226	-0.908822	-0.281987
chr1p33	CYP4X1	0	0	0	0.0825688	0.144737	0.113653	0.12844	0.342105	0.235273	0.00917431	0	0.00458716		gain	0.909425	2.80596	-0.741882	0.909425
chr1p33	CYP4Z1	0	0	0	0.0882353	0.135135	0.111685	0.137255	0.351351	0.244303	0.00980392	0	0.00490196		gain	-1.66786	1.66538	-0.262688	-0.262688
chr1p33	CYP4A22	0	0	0	0.0825688	0.131579	0.107074	0.146789	0.355263	0.251026	0.00917431	0	0.00458716		gain	-0.262288	1.42324	-0.622118	-0.262288
chr1p33	PDZK1IP1	0	0	0	0.0825688	0.131579	0.107074	0.146789	0.355263	0.251026	0.00917431	0	0.00458716		gain	2.20474	6.82339	3.88636	3.88636
chr1p33	TAL1	0	0	0	0.0825688	0.131579	0.107074	0.137615	0.355263	0.246439	0.00917431	0	0.00458716		gain	-2.8586	0.312196	-1.50299	-1.50299
chr1p33	STIL	0	0	0	0.0825688	0.131579	0.107074	0.146789	0.355263	0.251026	0.00917431	0	0.00458716		gain	0.884471	0.329034	-1.19363	0.329034
chr1p33	CMPK1	0	0	0	0.0747664	0.131579	0.103173	0.149533	0.355263	0.252398	0.00934579	0	0.0046729		gain	-0.324905	0.413058	-0.234945	-0.234945
chr1p33	FOXE3	0	0	0	0.0694444	0.137931	0.103688	0.194444	0.482759	0.338602	0.0138889	0	0.00694444		gain	-0.741977	1.21174	-0.626767	-0.626767
chr1p33	FOXD2	0	0	0	0.0694444	0.137931	0.103688	0.194444	0.482759	0.338602	0.0138889	0	0.00694444		gain	-0.324443	1.96196	0.712988	0.712988
chr1p33	TRABD2B	0	0	0	0.0694444	0.137931	0.103688	0.194444	0.482759	0.338602	0.0138889	0	0.00694444		gain	-0.1505	NA	1.49312	0.671308
chr1p33	SLC5A9	0	0	0	0.0841121	0.131579	0.107846	0.149533	0.328947	0.23924	0.00934579	0.0131579	0.0112518		gain	-0.992442	2.73474	-0.684172	-0.684172
chr1p33	SPATA6	0	0	0	0.0873786	0.133333	0.110356	0.106796	0.32	0.213398	0.00970874	0.0133333	0.011521		gain	0.591538	2.50222	1.08546	1.08546
chr1p33	AGBL4	0	0	0	0.0679612	0.147059	0.10751	0.203883	0.308824	0.256354	0.00970874	0.0294118	0.0195602			-2.43951	4.08502	2.00448	2.00448
chr1p33	BEND5	0	0	0	0.0694444	0.137931	0.103688	0.166667	0.482759	0.324713	0.0138889	0.0344828	0.0241858		gain	1.31754	4.64753	0.742303	1.31754
chr1p33	ELAVL4	0	0	0	0.0825688	0.133333	0.107951	0.12844	0.32	0.22422	0.00917431	0.0266667	0.0179205		gain	-2.06018	2.71165	1.05459	1.05459
chr1p32	DMRTA2	0	0	0	0.0694444	0.137931	0.103688	0.208333	0.448276	0.328305	0.0138889	0.0344828	0.0241858			-1.77192	-2.04666	-1.71836	-1.77192
chr1p32	FAF1	0	0	0	0.0925926	0.144737	0.118665	0.12963	0.368421	0.249025	0.00925926	0.0263158	0.0177875		gain	3.52432	2.5366	1.48926	2.5366
chr1p32	CDKN2C	0	0	0	0.0740741	0.144737	0.109405	0.12037	0.368421	0.244396	0.00925926	0.0263158	0.0177875		gain	6.97299	6.77249	4.05812	6.77249
chr1p32	C1orf185	0	0	0	0.0555556	0.137931	0.0967433	0.166667	0.448276	0.307471	0.0138889	0.0689655	0.0414272		gain	NA	0.351113	0.247656	0.299385
chr1p32	RNF11	0	0	0	0.0555556	0.172414	0.113985	0.166667	0.448276	0.307471	0.0138889	0.0344828	0.0241858		gain	-1.08114	1.10327	1.43411	1.10327
chr1p32	TTC39A	0	0	0	0.0571429	0.137931	0.0975369	0.185714	0.448276	0.316995	0.0142857	0.0344828	0.0243842		gain	0.250356	-0.948953	-1.77339	-0.948953
chr1p32	EPS15	0	0	0	0.0642202	0.131579	0.0978996	0.119266	0.368421	0.243844	0.00917431	0.0263158	0.0177451		gain	0.752258	0.215225	-0.452808	0.215225
chr1p32	OSBPL9	0	0	0	0.0566038	0.12	0.0883019	0.132075	0.36	0.246038	0.00943396	0.04	0.024717		gain	1.04877	1.35628	0.409602	1.04877
chr1p32	RAB3B	0	0	0	0.0566038	0.12	0.0883019	0.141509	0.36	0.250755	0.00943396	0.04	0.024717		gain	0.922394	1.2846	0.809238	0.922394
chr1p32	TXNDC12	0	0	0	0.0555556	0.103448	0.0795019	0.180556	0.448276	0.314416	0.0138889	0.0689655	0.0414272		gain	-5.72525	-5.27265	-4.33557	-5.27265
chr1p32	KTI12	0	0	0	0.0555556	0.103448	0.0795019	0.180556	0.448276	0.314416	0.0138889	0.0689655	0.0414272		gain	-2.35226	-0.83471	-1.73318	-1.73318
chr1p32	BTF3L4	0	0	0	0.0555556	0.103448	0.0795019	0.180556	0.448276	0.314416	0.0138889	0.0689655	0.0414272		gain	-0.560674	-1.86997	-0.564294	-0.564294
chr1p32	ZFYVE9	0	0	0	0.056338	0.103448	0.0798932	0.169014	0.448276	0.308645	0.0140845	0.0689655	0.041525		gain	-4.90477	-3.93072	-3.16628	-3.93072
chr1p32	CC2D1B	0	0	0	0.056338	0.103448	0.0798932	0.183099	0.448276	0.315687	0.0140845	0.0689655	0.041525		gain	-2.62488	-2.36646	-2.16371	-2.36646
chr1p32	ORC1	0	0	0	0.0555556	0.103448	0.0795019	0.180556	0.448276	0.314416	0.0138889	0.0689655	0.0414272		gain	-1.78607	NA	-1.59035	-1.68821
chr1p32	PRPF38A	0	0	0	0.0555556	0.103448	0.0795019	0.180556	0.448276	0.314416	0.0138889	0.0689655	0.0414272		gain	1.76708	0.744143	-0.341835	0.744143
chr1p32	GPX7	0	0	0	0.0673077	0.12	0.0936538	0.153846	0.36	0.256923	0.00961538	0.04	0.0248077		gain	-3.69413	-2.41865	-3.28314	-3.28314
chr1p32	ZYG11B	0	0	0	0.0555556	0.107143	0.0813492	0.194444	0.5	0.347222	0.0138889	0.0357143	0.0248016		gain	-0.00576457	2.36602	1.44906	1.44906
chr1p32	ZYG11A	0	0	0	0.0555556	0.103448	0.0795019	0.194444	0.482759	0.338602	0.0138889	0.0689655	0.0414272		gain	-2.23675	-4.96065	-3.17228	-3.17228
chr1p32	ECHDC2	0	0	0	0.0555556	0.103448	0.0795019	0.194444	0.482759	0.338602	0.0138889	0.0689655	0.0414272		gain	3.77678	4.06734	1.27185	3.77678
chr1p32	SCP2	0	0	0	0.056338	0.107143	0.0817404	0.183099	0.5	0.341549	0.0140845	0.0357143	0.0248994		gain	-4.02916	-2.80651	-2.99404	-2.99404
chr1p32	PODN	0	0	0	0.0555556	0.103448	0.0795019	0.222222	0.482759	0.35249	0.0138889	0.0689655	0.0414272			-5.60915	-2.93534	-5.927	-5.60915
chr1p32	SLC1A7	0	0	0	0.0555556	0.103448	0.0795019	0.222222	0.482759	0.35249	0.0138889	0.0689655	0.0414272			-2.4335	-2.32528	-4.84023	-2.4335
chr1p32	CPT2	0	0	0	0.0555556	0.103448	0.0795019	0.208333	0.482759	0.345546	0.0138889	0.0689655	0.0414272		gain	1.30711	3.03542	0.282644	1.30711
chr1p32	MAGOH	0	0	0	0.0555556	0.103448	0.0795019	0.208333	0.482759	0.345546	0.0138889	0.0689655	0.0414272		gain	-1.56861	-2.24567	-0.794271	-1.56861
chr1p32	LRP8	0	0	0	0.056338	0.103448	0.0798932	0.211268	0.482759	0.347013	0.0140845	0.0689655	0.041525		gain	0.63552	-0.406446	-1.5133	-0.406446
chr1p32	DMRTB1	0	0	0	0.0555556	0.103448	0.0795019	0.222222	0.482759	0.35249	0.0138889	0.0689655	0.0414272			-1.55639	-1.37475	-0.871493	-1.37475
chr1p32	GLIS1	0	0	0	0.0555556	0.103448	0.0795019	0.208333	0.482759	0.345546	0.0138889	0.0689655	0.0414272		gain	-3.65113	-4.61424	-4.68556	-4.61424
chr1p32	NDC1	0	0	0	0.0555556	0.103448	0.0795019	0.152778	0.482759	0.317768	0.0138889	0.0689655	0.0414272		gain	-3.76246	NA	-2.25804	-3.01025
chr1p32	YIPF1	0	0	0	0.0825688	0.118421	0.100495	0.110092	0.342105	0.226099	0.00917431	0.0526316	0.0309029		gain	-3.63631	-3.81936	-3.58977	-3.63631
chr1p32	DIO1	0	0	0	0.0833333	0.118421	0.100877	0.111111	0.342105	0.226608	0.00925926	0.0526316	0.0309454		gain	-0.322717	-0.512767	-2.08394	-0.512767
chr1p32	HSPB11	0	0	0	0.0825688	0.118421	0.100495	0.110092	0.342105	0.226099	0.00917431	0.0526316	0.0309029		gain	2.99224	1.03364	0.479862	1.03364
chr1p32	LRRC42	0	0	0	0.0825688	0.118421	0.100495	0.137615	0.342105	0.23986	0.00917431	0.0394737	0.024324		gain	0.237128	-0.544804	-0.0716314	-0.0716314
chr1p32	LDLRAD1	0	0	0	0.0833333	0.118421	0.100877	0.138889	0.342105	0.240497	0.00925926	0.0394737	0.0243665		gain	NA	1	-0.440586	0.279707
chr1p32	TMEM59	0	0	0	0.0825688	0.118421	0.100495	0.119266	0.342105	0.230686	0.00917431	0.0394737	0.024324		gain	-2.14391	-2.34275	NA	-2.24333
chr1p32	TCEANC2	0	0	0	0.0555556	0.103448	0.0795019	0.166667	0.482759	0.324713	0.0138889	0.0689655	0.0414272		gain	-0.150424	NA	NA	-0.150424
chr1p32	CDCP2	0	0	0	0.0555556	0.103448	0.0795019	0.222222	0.482759	0.35249	0.0138889	0.0689655	0.0414272			NA	1.50419	-1.29001	0.107091
chr1p32	CYB5RL	0	0	0	0.0555556	0.103448	0.0795019	0.208333	0.482759	0.345546	0.0138889	0.0689655	0.0414272		gain	2.82826	5.63814	0.593102	2.82826
chr1p32	MRPL37	0	0	0	0.0555556	0.103448	0.0795019	0.208333	0.482759	0.345546	0.0138889	0.0689655	0.0414272		gain	0.415898	-2.20994	-1.33545	-1.33545
chr1p32	SSBP3	0	0	0	0.0555556	0.107143	0.0813492	0.208333	0.464286	0.33631	0.0138889	0.0714286	0.0426587			0.983951	-0.89314	0.839599	0.839599
chr1p32	ACOT11	0	0	0	0.0422535	0.111111	0.0766823	0.211268	0.481481	0.346375	0.0140845	0.037037	0.0255608		gain	1.76063	3.02566	7.39122	3.02566
chr1p32	FAM151A	0	0	0	0.0555556	0.103448	0.0795019	0.208333	0.482759	0.345546	0.0138889	0.0689655	0.0414272		gain	-0.972151	1.2899	4.82049	1.2899
chr1p32	MROH7	0	0	0	0.0555556	0.103448	0.0795019	0.208333	0.482759	0.345546	0.0138889	0.0689655	0.0414272		gain	1.01754	NA	8.67078	4.84416
chr1p32	TTC4	0	0	0	0.0555556	0.103448	0.0795019	0.194444	0.482759	0.338602	0.0138889	0.0689655	0.0414272		gain	-2.11368	-2.73124	-1.19196	-2.11368
chr1p32	PARS2	0	0	0	0.0825688	0.12	0.101284	0.146789	0.333333	0.240061	0.00917431	0.0533333	0.0312538		gain	-0.815338	0.769054	-0.773086	-0.773086
chr1p32	TTC22	0	0	0	0.0825688	0.12	0.101284	0.146789	0.333333	0.240061	0.00917431	0.0533333	0.0312538		gain	-0.434676	0.309783	0.22583	0.22583
chr1p32	DHCR24	0	0	0	0.0825688	0.121622	0.102095	0.146789	0.324324	0.235557	0.00917431	0.0540541	0.0316142		gain	2.18037	0.607143	0.191131	0.607143
chr1p32	TMEM61	0	0	0	0.0555556	0.103448	0.0795019	0.208333	0.482759	0.345546	0.0138889	0.0689655	0.0414272		gain	2.89767	8.49143	5.59032	5.59032
chr1p32	BSND	0	0	0	0.0555556	0.103448	0.0795019	0.208333	0.482759	0.345546	0.0138889	0.0689655	0.0414272		gain	-1.90405	2.8511	0.0471868	0.0471868
chr1p32	PCSK9	0	0	0	0.0555556	0.103448	0.0795019	0.208333	0.482759	0.345546	0.0138889	0.0689655	0.0414272		gain	-1.65375	-2.90009	-2.0167	-2.0167
chr1p32	USP24	0	0	0	0.057971	0.103448	0.0807096	0.15942	0.482759	0.321089	0.0144928	0.0689655	0.0417291		gain	-1.38175	-0.843242	-2.1442	-1.38175
chr1p32	PRKAA2	0	0	0	0.0648148	0.0714286	0.0681217	0.12963	0.371429	0.250529	0.00925926	0.0857143	0.0474868		gain	8.79545	6.10529	14.2401	8.79545
chr1p32	C8A	0	0	0	0.0277778	0.103448	0.065613	0.180556	0.482759	0.331657	0.0138889	0.0689655	0.0414272		gain	-2.52852	-0.527824	-1.16689	-1.16689
chr1p32	C8B	0	0	0	0.0277778	0.103448	0.065613	0.180556	0.482759	0.331657	0.0138889	0.0689655	0.0414272		gain	-1.24849	0.371152	0.971158	0.371152
chr1p32	DAB1	0	0.0133333	0.00666666	0.0642202	0.0933333	0.0787768	0.165138	0.36	0.262569	0.00917431	0.12	0.0645872			2.38885	10.8294	5.24328	5.24328
chr1p32	OMA1	0	0	0	0.0642202	0.0657895	0.0650048	0.137615	0.342105	0.23986	0.00917431	0.131579	0.0703766			2.1365	4.35338	4.41058	4.35338
chr1p32	TACSTD2	0	0	0	0.0277778	0.103448	0.065613	0.194444	0.482759	0.338602	0.0138889	0.0689655	0.0414272		gain	2.27042	0.590982	1.56535	1.56535
chr1p32	MYSM1	0	0	0	0.0648148	0.0657895	0.0653021	0.138889	0.342105	0.240497	0.00925926	0.144737	0.076998			-2.4453	1.83945	-1.17953	-1.17953
chr1p32	JUN	0	0	0	0.0416667	0.103448	0.0725575	0.194444	0.482759	0.338602	0.0138889	0.0689655	0.0414272		gain	-0.338059	0.604152	-1.53895	-0.338059
chr1p32	FGGY	0	0	0	0.0555556	0.103448	0.0795019	0.194444	0.482759	0.338602	0.0138889	0.0689655	0.0414272		gain	0.470432	-0.849839	0.256966	0.256966
chr1p32	HOOK1	0	0	0	0.0555556	0.103448	0.0795019	0.194444	0.482759	0.338602	0.0138889	0.0689655	0.0414272		gain	0.752431	1.35211	1.28326	1.28326
chr1p32	CYP2J2	0	0	0	0.0555556	0.103448	0.0795019	0.194444	0.482759	0.338602	0.0138889	0.0689655	0.0414272		gain	0.591939	1.15197	1.05628	1.05628
chr1p32	C1orf87	0	0	0	0.0694444	0.103448	0.0864464	0.194444	0.482759	0.338602	0.0138889	0.0689655	0.0414272		gain	-1.38646	-1.09112	-0.566691	-1.09112
chr1p31	NFIA	0	0	0	0.0660377	0.0675676	0.0668027	0.141509	0.405405	0.273457	0.00943396	0.0945946	0.0520143		gain	4.53154	5.53032	2.57238	4.53154
chr1p31	TM2D1	0	0	0	0.0416667	0.103448	0.0725575	0.180556	0.482759	0.331657	0.0277778	0.0689655	0.0483716		gain	-0.153366	0.344016	2.22005	0.344016
chr1p31	L1TD1	0	0	0	0.0416667	0.103448	0.0725575	0.180556	0.482759	0.331657	0.0277778	0.0689655	0.0483716		gain	-1.02878	-1.35399	-0.445678	-1.02878
chr1p31	KANK4	0	0	0	0.0416667	0.103448	0.0725575	0.180556	0.482759	0.331657	0.0277778	0.0689655	0.0483716		gain	-4.07586	-5.7256	-3.67694	-4.07586
chr1p31	USP1	0	0	0	0.0416667	0.103448	0.0725575	0.180556	0.482759	0.331657	0.0277778	0.0689655	0.0483716		gain	2.13148	3.87211	1.16702	2.13148
chr1p31	DOCK7	0	0	0	0.0555556	0.103448	0.0795019	0.180556	0.482759	0.331657	0.0277778	0.0689655	0.0483716		gain	-7.32731	-3.01165	-3.63109	-3.63109
chr1p31	ANGPTL3	0	0	0	0.0416667	0.103448	0.0725575	0.180556	0.482759	0.331657	0.0277778	0.0689655	0.0483716		gain	-1.20521	-0.426299	-2.43192	-1.20521
chr1p31	ATG4C	0	0	0	0.0416667	0.103448	0.0725575	0.180556	0.482759	0.331657	0.0277778	0.0689655	0.0483716		gain	-4.88035	-3.63656	-4.53727	-4.53727
chr1p31	FOXD3	0	0	0	0.0416667	0.103448	0.0725575	0.166667	0.482759	0.324713	0.0416667	0.0689655	0.0553161		gain	0.48892	2.07811	2.93129	2.07811
chr1p31	ALG6	0	0	0	0.0555556	0.103448	0.0795019	0.166667	0.482759	0.324713	0.0416667	0.0689655	0.0553161		gain	-2.21341	-1.99432	-0.272147	-1.99432
chr1p31	ITGB3BP	0	0	0	0.0714286	0.103448	0.0874384	0.157143	0.482759	0.319951	0.0285714	0.0689655	0.0487685		gain	-0.87894	0.296193	0.425548	0.296193
chr1p31	EFCAB7	0	0	0	0.0925926	0.0657895	0.079191	0.12037	0.368421	0.244396	0.0185185	0.131579	0.0750487		gain	4.57995	4.93139	2.46521	4.57995
chr1p31	PGM1	0	0	0	0.0841121	0.0657895	0.0749508	0.130841	0.368421	0.249631	0.00934579	0.131579	0.0704624		gain	0.600567	-0.306445	0.0918741	0.0918741
chr1p31	ROR1	0	0	0	0.0917431	0.0921053	0.0919242	0.165138	0.355263	0.2602	0.0183486	0.105263	0.0618059		gain	3.01346	3.9429	0.39972	3.01346
chr1p31	UBE2U	0	0	0	0.0555556	0.103448	0.0795019	0.166667	0.482759	0.324713	0.0277778	0.0689655	0.0483716		gain	-1.20153	0.528373	-2.16262	-1.20153
chr1p31	CACHD1	0	0	0	0.0555556	0.103448	0.0795019	0.166667	0.482759	0.324713	0.0277778	0.0689655	0.0483716		gain	-4.51277	-0.601309	-2.24205	-2.24205
chr1p31	RAVER2	0	0	0	0.0555556	0.103448	0.0795019	0.166667	0.448276	0.307471	0.0277778	0.0689655	0.0483716		gain	4.71688	3.75194	3.46428	3.75194
chr1p31	JAK1	0	0	0	0.0555556	0.103448	0.0795019	0.166667	0.448276	0.307471	0.0277778	0.0689655	0.0483716		gain	-4.58358	-0.298991	-2.75272	-2.75272
chr1p31	AK4	0	0	0	0.056338	0.103448	0.0798932	0.169014	0.448276	0.308645	0.028169	0.0689655	0.0485673		gain	3.54443	NA	4.01862	3.78153
chr1p31	DNAJC6	0	0	0	0.0833333	0.0533333	0.0683333	0.166667	0.413333	0.29	0.0185185	0.0666667	0.0425926		gain	0.238879	0.930799	2.21531	0.930799
chr1p31	LEPR	0	0	0	0.0555556	0.107143	0.0813492	0.166667	0.428571	0.297619	0.0277778	0.0357143	0.031746		gain	-2.47575	-1.25069	-3.22725	-2.47575
chr1p31	LEPROT	0	0	0	0.0555556	0.103448	0.0795019	0.166667	0.448276	0.307471	0.0277778	0.0689655	0.0483716		gain	-2.25601	0.534178	-3.4449	-2.25601
chr1p31	PDE4B	0	0	0	0.0555556	0.111111	0.0833333	0.166667	0.444444	0.305556	0.0277778	0.037037	0.0324074		gain	7.92493	4.17454	2.75277	4.17454
chr1p31	SGIP1	0	0	0	0.0747664	0.0684932	0.0716298	0.130841	0.383562	0.257201	0.0186916	0.0410959	0.0298937		gain	12.9195	8.84302	6.21249	8.84302
chr1p31	TCTEX1D1	0	0	0	0.0555556	0.103448	0.0795019	0.180556	0.448276	0.314416	0.0277778	0.0689655	0.0483716		gain	-0.79743	-1.06031	-1.30423	-1.06031
chr1p31	INSL5	0	0	0	0.0555556	0.103448	0.0795019	0.180556	0.448276	0.314416	0.0277778	0.0689655	0.0483716		gain	-1.16451	-0.270276	-1.96029	-1.16451
chr1p31	WDR78	0	0	0	0.0555556	0.103448	0.0795019	0.180556	0.448276	0.314416	0.0277778	0.0689655	0.0483716		gain	-3.0456	-3.67661	-1.28515	-3.0456
chr1p31	MIER1	0	0	0	0.0555556	0.103448	0.0795019	0.180556	0.448276	0.314416	0.0277778	0.0689655	0.0483716		gain	3.92694	4.44293	1.87463	3.92694
chr1p31	SLC35D1	0	0	0	0.0555556	0.103448	0.0795019	0.180556	0.448276	0.314416	0.0277778	0.0689655	0.0483716		gain	4.9483	-0.152583	0.782448	0.782448
chr1p31	C1orf141	0	0	0	0.0555556	0.103448	0.0795019	0.180556	0.482759	0.331657	0.0277778	0.0689655	0.0483716		gain	NA	0.970637	-0.0789039	0.445867
chr1p31	IL23R	0	0	0	0.0555556	0.103448	0.0795019	0.180556	0.482759	0.331657	0.0277778	0.0689655	0.0483716		gain	-1.36223	-1.25199	-0.817558	-1.25199
chr1p31	IL12RB2	0	0	0	0.0555556	0.103448	0.0795019	0.180556	0.482759	0.331657	0.0277778	0.0689655	0.0483716		gain	-1.87532	0.278311	0.21497	0.21497
chr1p31	SERBP1	0	0	0	0.0555556	0.103448	0.0795019	0.180556	0.482759	0.331657	0.0277778	0.0689655	0.0483716		gain	-1.61671	-2.04955	-0.286538	-1.61671
chr1p31	GADD45A	0	0	0	0.0679612	0.0675676	0.0677644	0.135922	0.378378	0.25715	0.0194175	0.0675676	0.0434925		gain	5.99041	6.57828	2.83893	5.99041
chr1p31	GNG12	0	0	0	0.0825688	0.0657895	0.0741791	0.12844	0.394737	0.261589	0.0183486	0.0657895	0.042069		gain	4.24073	8.13397	3.00305	4.24073
chr1p31	DIRAS3	0	0	0	0.0555556	0.103448	0.0795019	0.180556	0.482759	0.331657	0.0277778	0.0689655	0.0483716		gain	4.16119	4.47886	2.00053	4.16119
chr1p31	WLS	0	0	0	0.0555556	0.103448	0.0795019	0.180556	0.482759	0.331657	0.0277778	0.0689655	0.0483716		gain	-1.0929	1.43989	0.946991	0.946991
chr1p31	RPE65	0	0	0	0.0555556	0.103448	0.0795019	0.180556	0.448276	0.314416	0.0277778	0.0689655	0.0483716		gain	10.6894	12.6705	14.7008	12.6705
chr1p31	DEPDC1	0	0	0	0.0555556	0.103448	0.0795019	0.180556	0.448276	0.314416	0.0277778	0.0689655	0.0483716		gain	2.729	-0.130589	0.21126	0.21126
chr1p31	LRRC7	0	0	0	0.0422535	0.115385	0.0788191	0.197183	0.461538	0.329361	0.0140845	0.0384615	0.026273			2.92099	9.841	4.14217	4.14217
chr1p31	LRRC40	0	0	0	0.0422535	0.103448	0.0728509	0.197183	0.448276	0.322729	0.028169	0.0689655	0.0485673			-3.01947	-1.12871	-1.70424	-1.70424
chr1p31	SRSF11	0	0	0	0.0416667	0.103448	0.0725575	0.208333	0.448276	0.328305	0.0277778	0.0689655	0.0483716			-1.03082	NA	-0.816006	-0.923412
chr1p31	ANKRD13C	0	0	0	0.0422535	0.103448	0.0728509	0.197183	0.448276	0.322729	0.028169	0.0689655	0.0485673			-2.29252	-1.37414	-1.59037	-1.59037
chr1p31	HHLA3	0	0	0	0.0416667	0.103448	0.0725575	0.194444	0.448276	0.32136	0.0277778	0.0689655	0.0483716			2.27465	2.01887	1.2754	2.01887
chr1p31	CTH	0	0	0	0.0416667	0.103448	0.0725575	0.194444	0.448276	0.32136	0.0277778	0.0689655	0.0483716			-4.75594	-4.03591	-3.51315	-4.03591
chr1p31	PTGER3	0	0	0	0.0416667	0.103448	0.0725575	0.208333	0.448276	0.328305	0.0138889	0.0689655	0.0414272			5.94226	4.75703	1.6231	4.75703
chr1p31	ZRANB2	0	0	0	0.0416667	0.103448	0.0725575	0.208333	0.448276	0.328305	0.0138889	0.0689655	0.0414272			1.80093	3.35585	0.156203	1.80093
chr1p31	NEGR1	0.00970874	0.0138889	0.0117988	0.0776699	0.0972222	0.0874461	0.174757	0.347222	0.26099	0.0194175	0.0555556	0.0374865		gain	3.7753	2.83849	1.68763	2.83849
chr1p31	LRRIQ3	0	0	0	0.046729	0.0972222	0.0719756	0.158879	0.319444	0.239161	0.0186916	0.0694444	0.044068		gain	-0.790533	1.26017	0.459868	0.459868
chr1p31	FPGT	0	0	0	0.0416667	0.137931	0.0897988	0.194444	0.37931	0.286877	0.0277778	0.0689655	0.0483716			3.44326	1.72097	1.99988	1.99988
chr1p31	TNNI3K	0	0	0	0.0416667	0.142857	0.0922619	0.194444	0.357143	0.275794	0.0277778	0.0714286	0.0496032			0.314783	7.61379	5.2161	5.2161
chr1p31	CRYZ	0	0	0	0.0416667	0.137931	0.0897988	0.194444	0.37931	0.286877	0.0277778	0.0689655	0.0483716			1.87308	0.964586	2.42913	1.87308
chr1p31	TYW3	0	0	0	0.0416667	0.137931	0.0897988	0.194444	0.37931	0.286877	0.0277778	0.0689655	0.0483716			-0.371661	1.95777	2.4623	1.95777
chr1p31	LHX8	0	0	0	0.0462963	0.0933333	0.0698148	0.148148	0.32	0.234074	0.0185185	0.0666667	0.0425926		gain	-3.17666	-3.53637	-3.73501	-3.53637
chr1p31	SLC44A5	0	0	0	0.0434783	0.148148	0.0958132	0.202899	0.407407	0.305153	0.0144928	0.037037	0.0257649			2.0143	1.82167	1.89308	1.89308
chr1p31	ACADM	0	0	0	0.0555556	0.142857	0.0992063	0.194444	0.428571	0.311508	0.0138889	0.0714286	0.0426587			0.319687	1.11347	0.818537	0.818537
chr1p31	RABGGTB	0	0	0	0.0555556	0.137931	0.0967433	0.194444	0.413793	0.304119	0.0138889	0.0689655	0.0414272			-5.53276	-3.66908	-1.9782	-3.66908
chr1p31	MSH4	0	0	0	0.0555556	0.137931	0.0967433	0.194444	0.413793	0.304119	0.0138889	0.0689655	0.0414272			0.354126	1.32997	0.401227	0.401227
chr1p31	ASB17	0	0	0	0.0555556	0.137931	0.0967433	0.194444	0.413793	0.304119	0.0138889	0.0689655	0.0414272			-0.572328	1.69642	0.785144	0.785144
chr1p31	ST6GALNAC3	0	0.0133333	0.00666666	0.0642202	0.106667	0.0854434	0.146789	0.333333	0.240061	0.00917431	0.0533333	0.0312538		gain	-1.90387	2.33593	0.23583	0.23583
chr1p31	ST6GALNAC5	0	0	0	0.0422535	0.148148	0.0952008	0.197183	0.481481	0.339332	0.0140845	0.037037	0.0255608		gain	9.06622	4.47575	3.84112	4.47575
chr1p31	PIGK	0	0	0	0.0416667	0.137931	0.0897988	0.194444	0.448276	0.32136	0.0277778	0.0689655	0.0483716			1.99948	-0.27322	0.642441	0.642441
chr1p31	AK5	0	0	0	0.0416667	0.142857	0.0922619	0.194444	0.392857	0.293651	0.0277778	0.107143	0.0674603			-4.14209	-3.74904	-2.9227	-3.74904
chr1p31	ZZZ3	0	0	0	0.0416667	0.107143	0.0744048	0.194444	0.428571	0.311508	0.0277778	0.0714286	0.0496032			-2.91148	-0.373155	-1.97839	-1.97839
chr1p31	USP33	0	0	0	0.0416667	0.103448	0.0725575	0.194444	0.448276	0.32136	0.0277778	0.0689655	0.0483716			-2.3945	0.16188	-1.34457	-1.34457
chr1p31	NEXN	0	0	0	0.0416667	0.103448	0.0725575	0.194444	0.448276	0.32136	0.0277778	0.0689655	0.0483716			10.0402	6.85202	8.64659	8.64659
chr1p31	FUBP1	0	0	0	0.0416667	0.103448	0.0725575	0.194444	0.448276	0.32136	0.0277778	0.0689655	0.0483716			-0.599012	-3.40382	-1.78279	-1.78279
chr1p31	DNAJB4	0	0	0	0.0416667	0.103448	0.0725575	0.194444	0.448276	0.32136	0.0277778	0.0689655	0.0483716			2.25451	-0.966368	1.91369	1.91369
chr1p31	GIPC2	0	0	0	0.0462963	0.0945946	0.0704454	0.138889	0.364865	0.251877	0.0185185	0.0135135	0.016016		gain	-2.41264	-0.81837	-1.08606	-1.08606
chr1p31	PTGFR	0	0	0	0.0416667	0.137931	0.0897988	0.194444	0.37931	0.286877	0.0277778	0.137931	0.0828544			-3.55281	-2.16813	-2.11623	-2.16813
chr1p31	IFI44L	0	0	0	0.0422535	0.137931	0.0900923	0.197183	0.37931	0.288247	0.0140845	0.103448	0.0587664			2.24717	1.48487	-0.0373044	1.48487
chr1p31	IFI44	0	0	0	0.0555556	0.137931	0.0967433	0.194444	0.37931	0.286877	0.0138889	0.103448	0.0586686			0.353927	-1.38266	-1.72972	-1.38266
chr1p31	TTLL7	0	0	0	0.0422535	0.137931	0.0900923	0.183099	0.482759	0.332929	0.0140845	0.0689655	0.041525		gain	8.9211	5.57093	5.15024	5.57093
chr1p31	PRKACB	0	0	0	0.0416667	0.137931	0.0897988	0.180556	0.482759	0.331657	0.0138889	0.0689655	0.0414272		gain	3.12008	5.31033	1.4809	3.12008
chr1p31	SAMD13	0	0	0	0.0550459	0.131579	0.0933124	0.12844	0.381579	0.25501	0.00917431	0.0394737	0.024324		gain	5.10363	6.63488	8.34188	6.63488
chr1p31	DNASE2B	0	0	0	0.0550459	0.131579	0.0933124	0.12844	0.381579	0.25501	0.00917431	0.0394737	0.024324		gain	-0.992247	1.39535	-0.497625	-0.497625
chr1p22	RPF1	0	0	0	0.0416667	0.137931	0.0897988	0.180556	0.482759	0.331657	0.0138889	0.0689655	0.0414272		gain	-0.444958	-1.37074	-1.06612	-1.06612
chr1p22	GNG5	0	0	0	0.0416667	0.137931	0.0897988	0.180556	0.482759	0.331657	0.0138889	0.0689655	0.0414272		gain	-0.873076	-2.55223	-2.54436	-2.54436
chr1p22	CTBS	0	0	0	0.0416667	0.137931	0.0897988	0.180556	0.482759	0.331657	0.0138889	0.0689655	0.0414272		gain	0.0852463	-0.630786	-1.40432	-0.630786
chr1p22	SSX2IP	0	0	0	0.0555556	0.137931	0.0967433	0.180556	0.482759	0.331657	0.0138889	0.0689655	0.0414272		gain	3.35055	2.4094	0.317599	2.4094
chr1p22	LPAR3	0	0	0	0.0555556	0.137931	0.0967433	0.180556	0.482759	0.331657	0.0138889	0.0689655	0.0414272		gain	-1.728	-1.63976	-2.11754	-1.728
chr1p22	MCOLN2	0	0	0	0.0555556	0.137931	0.0967433	0.180556	0.448276	0.314416	0.0138889	0.103448	0.0586686		gain	0.0822924	-1.50134	-0.87368	-0.87368
chr1p22	MCOLN3	0	0	0	0.0555556	0.137931	0.0967433	0.180556	0.517241	0.348898	0.0138889	0.0344828	0.0241858		gain	2.37247	1.31033	-1.25256	1.31033
chr1p22	WDR63	0	0	0	0.0555556	0.137931	0.0967433	0.180556	0.517241	0.348898	0.0138889	0.0344828	0.0241858		gain	-2.21871	-1.07366	-2.23605	-2.21871
chr1p22	SYDE2	0	0	0	0.0480769	0.135135	0.091606	0.134615	0.391892	0.263254	0.00961538	0.027027	0.0183212		gain	4.04996	3.35959	0.843833	3.35959
chr1p22	C1orf52	0	0	0	0.0480769	0.135135	0.091606	0.125	0.378378	0.251689	0.00961538	0.0135135	0.0115644		gain	-3.73403	-2.63825	-2.87204	-2.87204
chr1p22	BCL10	0	0	0	0.0480769	0.135135	0.091606	0.125	0.378378	0.251689	0.00961538	0.027027	0.0183212		gain	-6.5997	-6.391	-4.34969	-6.391
chr1p22	DDAH1	0	0	0	0.0576923	0.135135	0.0964137	0.134615	0.405405	0.27001	0.0192308	0.0135135	0.0163721		gain	4.64988	2.57019	3.28041	3.28041
chr1p22	ZNHIT6	0	0	0	0.0555556	0.137931	0.0967433	0.180556	0.551724	0.36614	0.0138889	0	0.00694444		gain	-3.0995	-1.95693	-2.2709	-2.2709
chr1p22	COL24A1	0	0	0	0.031746	0.107143	0.0694444	0.15873	0.571429	0.365079	0.015873	0	0.00793651		gain	-3.47246	-7.59533	-4.13371	-4.13371
chr1p22	ODF2L	0	0	0	0.0555556	0.137931	0.0967433	0.180556	0.551724	0.36614	0.0138889	0	0.00694444		gain	-11.4182	-9.31737	-6.8399	-9.31737
chr1p22	CLCA2	0	0	0	0.0555556	0.137931	0.0967433	0.180556	0.551724	0.36614	0.0138889	0	0.00694444		gain	-1.48876	-0.660779	-1.21104	-1.21104
chr1p22	CLCA1	0	0	0	0.0648148	0.136986	0.100901	0.12963	0.410959	0.270294	0.00925926	0.0136986	0.0114789		gain	-1.20032	-1.31913	-2.24336	-1.31913
chr1p22	CLCA4	0	0	0	0.0648148	0.136986	0.100901	0.12963	0.410959	0.270294	0.00925926	0.0136986	0.0114789		gain	-1.45471	-1.35393	-2.26283	-1.45471
chr1p22	SH3GLB1	0	0	0	0.0555556	0.137931	0.0967433	0.180556	0.551724	0.36614	0.0138889	0	0.00694444		gain	-2.34338	-1.10821	-3.0769	-2.34338
chr1p22	HS2ST1	0	0	0	0.0555556	0.137931	0.0967433	0.180556	0.551724	0.36614	0.0138889	0	0.00694444		gain	-2.01399	-1.51059	-4.70003	-2.01399
chr1p22	LMO4	0	0	0	0.0694444	0.137931	0.103688	0.180556	0.517241	0.348898	0.0138889	0.0344828	0.0241858		gain	0.379181	0.176381	-0.177896	0.176381
chr1p22	PKN2	0	0	0	0.0654206	0.136986	0.101203	0.130841	0.369863	0.250352	0.00934579	0.0684932	0.0389195		gain	1.11348	3.32501	0.0154957	1.11348
chr1p22	GTF2B	0	0	0	0.0694444	0.137931	0.103688	0.180556	0.413793	0.297174	0.0138889	0.103448	0.0586686			-1.3335	-1.25995	-0.410351	-1.25995
chr1p22	RBMXL1	0	0	0	0.0694444	0.137931	0.103688	0.180556	0.448276	0.314416	0.0138889	0.0689655	0.0414272		gain	3.43123	6.51016	1.53417	3.43123
chr1p22	GBP3	0	0	0	0.056338	0.148148	0.102243	0.183099	0.481481	0.33229	0.0140845	0.037037	0.0255608		gain	0.929335	-0.293024	-1.40346	-0.293024
chr1p22	GBP1	0	0	0	0.0694444	0.137931	0.103688	0.180556	0.448276	0.314416	0.0138889	0.0689655	0.0414272		gain	4.54498	1.37289	1.28954	1.37289
chr1p22	GBP2	0	0	0	0.0694444	0.137931	0.103688	0.180556	0.448276	0.314416	0.0138889	0.0689655	0.0414272		gain	7.1787	4.64527	6.21829	6.21829
chr1p22	GBP7	0	0	0	0.0694444	0.137931	0.103688	0.180556	0.448276	0.314416	0.0138889	0.0689655	0.0414272		gain	NA	-0.120404	0.0566308	-0.0318864
chr1p22	GBP4	0	0	0	0.0694444	0.137931	0.103688	0.180556	0.448276	0.314416	0.0138889	0.0689655	0.0414272		gain	0.0361583	1.06076	-0.548216	0.0361583
chr1p22	GBP5	0	0	0	0.0694444	0.172414	0.120929	0.180556	0.413793	0.297174	0.0138889	0.0689655	0.0414272			-0.0904423	-1.9901	-1.90771	-1.90771
chr1p22	GBP6	0	0	0	0.0754717	0.146667	0.111069	0.141509	0.346667	0.244088	0.00943396	0.0666667	0.0380503		gain	-1.40435	0.19159	-0.119756	-0.119756
chr1p22	LRRC8B	0	0	0	0.0849057	0.148649	0.116777	0.122642	0.337838	0.23024	0.00943396	0.0675676	0.0385008		gain	4.79413	6.96962	5.61567	5.61567
chr1p22	LRRC8C	0	0	0	0.0833333	0.172414	0.127874	0.166667	0.37931	0.272989	0.0138889	0.103448	0.0586686			0.135733	4.27491	0.28435	0.28435
chr1p22	LRRC8D	0	0	0	0.0833333	0.172414	0.127874	0.166667	0.37931	0.272989	0.0138889	0.103448	0.0586686			-9.60251	-10.1632	-4.3375	-9.60251
chr1p22	ZNF326	0	0	0	0.0833333	0.172414	0.127874	0.166667	0.37931	0.272989	0.0138889	0.103448	0.0586686			-4.14384	-4.17016	-1.62741	-4.14384
chr1p22	BARHL2	0	0	0	0.0833333	0.172414	0.127874	0.166667	0.37931	0.272989	0.0138889	0.103448	0.0586686			NA	-1.781	-1.23292	-1.50696
chr1p22	ZNF644	0	0	0	0.0833333	0.172414	0.127874	0.166667	0.37931	0.272989	0.0138889	0.103448	0.0586686			NA	3.05523	0.695858	1.87554
chr1p22	HFM1	0	0	0	0.0833333	0.137931	0.110632	0.166667	0.37931	0.272989	0.0138889	0.103448	0.0586686			-1.35623	3.52148	1.16407	1.16407
chr1p22	CDC7	0	0	0	0.0833333	0.137931	0.110632	0.166667	0.37931	0.272989	0.0138889	0.103448	0.0586686			2.54782	1.41202	-1.29698	1.41202
chr1p22	TGFBR3	0	0	0	0.0740741	0.146667	0.11037	0.138889	0.36	0.249444	0.00925926	0.0533333	0.0312963		gain	-0.468998	4.6049	0.873438	0.873438
chr1p22	BRDT	0	0	0	0.0833333	0.137931	0.110632	0.166667	0.37931	0.272989	0.0138889	0.103448	0.0586686			-1.39736	-0.861454	-0.219614	-0.861454
chr1p22	EPHX4	0	0	0	0.0833333	0.172414	0.127874	0.166667	0.37931	0.272989	0.0138889	0.0689655	0.0414272			0.83282	1.087	0.561434	0.83282
chr1p22	BTBD8	0	0	0	0.0833333	0.172414	0.127874	0.166667	0.37931	0.272989	0.0138889	0.0689655	0.0414272			-1.23429	3.12707	1.27113	1.27113
chr1p22	KIAA1107	0	0	0	0.0972222	0.172414	0.134818	0.166667	0.37931	0.272989	0.0138889	0.0689655	0.0414272			0.473129	5.70859	1.36373	1.36373
chr1p22	C1orf146	0	0	0	0.0972222	0.172414	0.134818	0.166667	0.37931	0.272989	0.0138889	0.0689655	0.0414272			NA	-0.561393	-0.300004	-0.430698
chr1p22	GLMN	0	0	0	0.0972222	0.172414	0.134818	0.166667	0.37931	0.272989	0.0138889	0.0689655	0.0414272			-0.712628	-1.55125	-2.30082	-1.55125
chr1p22	RPAP2	0	0	0	0.0972222	0.172414	0.134818	0.166667	0.37931	0.272989	0.0138889	0.0689655	0.0414272			-0.693035	-0.645194	-1.82453	-0.693035
chr1p22	GFI1	0	0	0	0.0825688	0.178082	0.130325	0.12844	0.342466	0.235453	0.00917431	0.0273973	0.0182858		gain	-1.31531	-2.18938	-1.91151	-1.91151
chr1p22	EVI5	0	0	0	0.0833333	0.173333	0.128333	0.12037	0.346667	0.233519	0.00925926	0.04	0.0246296		gain	-5.50082	-2.59286	-2.5691	-2.59286
chr1p22	RPL5	0	0	0	0.0972222	0.172414	0.134818	0.166667	0.37931	0.272989	0.0138889	0.0689655	0.0414272			0.47308	-1.8283	0.413002	0.413002
chr1p22	MTF2	0	0	0	0.0972222	0.172414	0.134818	0.166667	0.37931	0.272989	0.0138889	0.0689655	0.0414272			-0.450296	-2.15258	-0.704466	-0.704466
chr1p22	TMED5	0	0	0	0.0972222	0.172414	0.134818	0.166667	0.413793	0.29023	0.0138889	0.0689655	0.0414272			2.72187	0.105587	0.772552	0.772552
chr1p22	CCDC18	0	0	0	0.0972222	0.172414	0.134818	0.166667	0.413793	0.29023	0.0138889	0.0689655	0.0414272			-0.564229	-2.16386	-1.22811	-1.22811
chr1p22	DR1	0	0	0	0.0972222	0.172414	0.134818	0.166667	0.413793	0.29023	0.0138889	0.0689655	0.0414272			1.26107	-1.44706	-0.929757	-0.929757
chr1p22	FNBP1L	0	0	0	0.0925926	0.144737	0.118665	0.12037	0.342105	0.231238	0.00925926	0.0394737	0.0243665		gain	0.422694	0.372499	-1.56324	0.372499
chr1p22	BCAR3	0	0	0	0.0925926	0.144737	0.118665	0.12037	0.355263	0.237817	0.00925926	0.0394737	0.0243665		gain	-1.45093	-0.370596	-0.534111	-0.534111
chr1p22	DNTTIP2	0	0	0	0.0972222	0.172414	0.134818	0.166667	0.413793	0.29023	0.0138889	0.0689655	0.0414272			-1.71638	-1.53028	-1.02397	-1.53028
chr1p22	GCLM	0	0	0	0.0972222	0.172414	0.134818	0.166667	0.413793	0.29023	0.0138889	0.0689655	0.0414272			-2.77485	-1.52877	-2.44073	-2.44073
chr1p22	ABCA4	0	0	0	0.0972222	0.172414	0.134818	0.166667	0.413793	0.29023	0.0138889	0.0689655	0.0414272			-1.1488	0.318772	-0.926915	-0.926915
chr1p22	ARHGAP29	0	0	0	0.0972222	0.172414	0.134818	0.166667	0.413793	0.29023	0.0138889	0.0689655	0.0414272			0.611708	2.73793	0.366163	0.611708
chr1p21	ABCD3	0	0	0	0.0833333	0.146667	0.115	0.12037	0.36	0.240185	0.00925926	0.04	0.0246296		gain	0.566889	1.49424	-0.195234	0.566889
chr1p21	F3	0	0	0	0.0833333	0.146667	0.115	0.12037	0.346667	0.233519	0.00925926	0.04	0.0246296		gain	0.904617	0.0658452	0.134033	0.134033
chr1p21	SLC44A3	0	0	0	0.0769231	0.148649	0.112786	0.125	0.364865	0.244932	0.00961538	0.0540541	0.0318347		gain	1.44771	-0.993937	-0.73292	-0.73292
chr1p21	CNN3	0	0	0	0.0769231	0.148649	0.112786	0.115385	0.364865	0.240125	0.00961538	0.0540541	0.0318347		gain	0.198381	-2.66548	-1.68293	-1.68293
chr1p21	ALG14	0	0	0	0.0972222	0.172414	0.134818	0.166667	0.448276	0.307471	0.0138889	0.0689655	0.0414272		gain	-4.41291	-5.87276	-5.08753	-5.08753
chr1p21	RWDD3	0	0	0	0.0972222	0.172414	0.134818	0.166667	0.448276	0.307471	0.0138889	0.0689655	0.0414272		gain	1.10281	0.0468103	-0.437136	0.0468103
chr1p21	PTBP2	0	0	0	0.0972222	0.214286	0.155754	0.166667	0.392857	0.279762	0.0138889	0.0357143	0.0248016			6.19757	5.24731	2.90175	5.24731
chr1p21	DPYD	0	0	0	0.0943396	0.189189	0.141764	0.150943	0.283784	0.217364	0.0283019	0.0405405	0.0344212			-0.770483	0.64588	-2.09917	-0.770483
chr1p21	SNX7	0	0	0	0.0972222	0.206897	0.152059	0.166667	0.37931	0.272989	0.0138889	0.0344828	0.0241858			2.37112	2.60817	-0.884968	2.37112
chr1p21	PALMD	0	0	0	0.0769231	0.186667	0.131795	0.125	0.306667	0.215833	0.00961538	0.04	0.0248077		gain	2.8556	2.10971	0.554111	2.10971
chr1p21	FRRS1	0	0	0	0.0972222	0.206897	0.152059	0.152778	0.344828	0.248803	0.0138889	0.0344828	0.0241858			-0.600802	0.327939	-2.71562	-0.600802
chr1p21	AGL	0	0	0	0.0972222	0.206897	0.152059	0.152778	0.344828	0.248803	0.0138889	0.0344828	0.0241858			4.7642	3.86899	4.38347	4.38347
chr1p21	SLC35A3	0	0	0	0.0972222	0.206897	0.152059	0.152778	0.344828	0.248803	0.0138889	0.0344828	0.0241858			1.86772	1.98509	-0.245538	1.86772
chr1p21	SASS6	0	0	0	0.0972222	0.206897	0.152059	0.152778	0.344828	0.248803	0.0138889	0.0344828	0.0241858			-0.418887	0.788132	-1.31238	-0.418887
chr1p21	TRMT13	0	0	0	0.0972222	0.214286	0.155754	0.152778	0.357143	0.25496	0.0138889	0	0.00694444			-0.38679	NA	-1.92668	-1.15674
chr1p21	LRRC39	0	0	0	0.0972222	0.206897	0.152059	0.152778	0.37931	0.266044	0.0138889	0	0.00694444			-1.14162	0.202688	-1.82271	-1.14162
chr1p21	DBT	0	0	0	0.0972222	0.206897	0.152059	0.152778	0.37931	0.266044	0.0138889	0	0.00694444			0.0784441	3.124	0.453045	0.453045
chr1p21	RTCA	0	0	0	0.0972222	0.206897	0.152059	0.152778	0.37931	0.266044	0.0138889	0	0.00694444			-3.88102	NA	-2.98974	-3.43538
chr1p21	CDC14A	0	0	0	0.0972222	0.214286	0.155754	0.152778	0.357143	0.25496	0.0138889	0	0.00694444			-2.75207	1.50165	-1.98648	-1.98648
chr1p21	GPR88	0	0	0	0.0972222	0.206897	0.152059	0.152778	0.344828	0.248803	0.0138889	0.0344828	0.0241858			-0.0198364	0.366211	-2.26762	-0.0198364
chr1p21	VCAM1	0	0	0	0.0972222	0.206897	0.152059	0.152778	0.344828	0.248803	0.0138889	0.0344828	0.0241858			-0.738339	-3.6601	-5.5114	-3.6601
chr1p21	EXTL2	0	0	0	0.0841121	0.173333	0.128723	0.121495	0.306667	0.214081	0.00934579	0.0266667	0.0180062		gain	-2.70134	-2.35448	-3.43359	-2.70134
chr1p21	SLC30A7	0	0	0	0.0841121	0.175676	0.129894	0.121495	0.310811	0.216153	0.00934579	0.0135135	0.0114297		gain	-6.65384	-6.67808	-6.4418	-6.65384
chr1p21	DPH5	0	0	0	0.0917431	0.175676	0.133709	0.137615	0.297297	0.217456	0.00917431	0.0135135	0.0113439		gain	-1.90479	-2.21224	-1.25021	-1.90479
chr1p21	S1PR1	0	0	0	0.0917431	0.173333	0.132538	0.119266	0.306667	0.212966	0.00917431	0.0266667	0.0179205		gain	-2.04642	1.44074	-4.34691	-2.04642
chr1p21	OLFM3	0	0	0	0.0925926	0.189189	0.140891	0.12037	0.310811	0.215591	0.00925926	0.0135135	0.0113864		gain	-1.456	-2.21547	-0.952445	-1.456
chr1p21	COL11A1	0	0	0	0.0841121	0.157895	0.121003	0.121495	0.302632	0.212063	0.00934579	0.0131579	0.0112518		gain	-2.65895	-4.88291	-2.79036	-2.79036
chr1p21	RNPC3	0.0138889	0	0.00694444	0.0972222	0.206897	0.152059	0.138889	0.37931	0.2591	0.0138889	0	0.00694444		gain	4.19977	6.09903	3.42881	4.19977
chr1p21	AMY2B	0.0138889	0	0.00694444	0.0972222	0.206897	0.152059	0.138889	0.37931	0.2591	0.0138889	0	0.00694444		gain	NA	5.93299	3.87056	4.90178
chr1p21	AMY2A	0.0380952	0.015625	0.0268601	0.133333	0.3125	0.222917	0.133333	0.3125	0.222917	0.0190476	0.015625	0.0173363		gain	NA	3.39427	3.7158	3.55503
chr1p13	PRMT6	0	0	0	0.111111	0.241379	0.176245	0.166667	0.275862	0.221264	0	0	0			1.14338	0.36525	-0.0242215	0.36525
chr1p13	NTNG1	0	0	0	0.111111	0.16	0.135556	0.157407	0.293333	0.22537	0	0.0133333	0.00666666			-0.15264	0.340595	-1.03147	-0.15264
chr1p13	VAV3	0	0	0	0.0934579	0.157895	0.125676	0.140187	0.276316	0.208251	0	0.0131579	0.00657895			-0.0413184	-0.513399	-1.76668	-0.513399
chr1p13	SLC25A24	0	0	0	0.0985915	0.222222	0.160407	0.169014	0.259259	0.214137	0	0	0			0.90249	0.602593	-0.559361	0.602593
chr1p13	NBPF4	0	0	0	0.0757576	0.214286	0.145022	0.151515	0.285714	0.218615	0	0	0			-0.622307	-1.62962	-1.28397	-1.28397
chr1p13	NBPF6	0	0	0	0.0862069	0.227273	0.15674	0.172414	0.227273	0.199843	0	0	0			NA	-1.2641	-1.54353	-1.40381
chr1p13	FAM102B	0	0	0	0.111111	0.206897	0.159004	0.166667	0.310345	0.238506	0	0	0			5.29717	6.17361	4.01846	5.29717
chr1p13	HENMT1	0	0	0	0.111111	0.206897	0.159004	0.152778	0.310345	0.231561	0	0	0			-0.927412	NA	-2.23543	-1.58142
chr1p13	PRPF38B	0	0	0	0.101852	0.146667	0.124259	0.12037	0.28	0.200185	0	0	0		gain	-0.543162	0.529843	0.112701	0.112701
chr1p13	FNDC7	0	0	0	0.101852	0.146667	0.124259	0.12037	0.306667	0.213519	0	0	0		gain	-0.65462	3.42023	1.19353	1.19353
chr1p13	STXBP3	0	0	0	0.103774	0.146667	0.12522	0.113208	0.306667	0.209937	0	0	0		gain	3.67158	5.11985	3.3661	3.67158
chr1p13	AKNAD1	0	0.0133333	0.00666666	0.101852	0.146667	0.124259	0.12037	0.28	0.200185	0	0	0		gain	-1.31169	3.85451	0.698084	0.698084
chr1p13	GPSM2	0	0	0	0.111111	0.206897	0.159004	0.152778	0.310345	0.231561	0	0	0			2.62384	2.21275	0.683544	2.21275
chr1p13	CLCC1	0	0	0	0.111111	0.206897	0.159004	0.152778	0.310345	0.231561	0	0	0			2.23333	4.59994	1.08262	2.23333
chr1p13	WDR47	0	0	0	0.111111	0.214286	0.162698	0.152778	0.321429	0.237103	0	0	0			2.75857	3.88804	3.30327	3.30327
chr1p13	TAF13	0	0	0	0.111111	0.206897	0.159004	0.180556	0.310345	0.24545	0	0	0			-1.17469	-0.487939	-1.08598	-1.08598
chr1p13	TMEM167B	0	0	0	0.111111	0.206897	0.159004	0.180556	0.310345	0.24545	0	0	0			-4.30578	-3.83711	-2.52589	-3.83711
chr1p13	C1orf194	0	0	0	0.111111	0.206897	0.159004	0.180556	0.310345	0.24545	0	0	0			-0.0921033	0.92954	-2.38165	-0.0921033
chr1p13	KIAA1324	0	0	0	0.111111	0.206897	0.159004	0.180556	0.310345	0.24545	0	0	0			-1.16	0.695375	0.603373	0.603373
chr1p13	CELSR2	0	0	0	0.0943396	0.157895	0.126117	0.122642	0.276316	0.199479	0	0	0		gain	8.37147	5.69563	6.72081	6.72081
chr1p13	PSRC1	0	0	0	0.0943396	0.157895	0.126117	0.122642	0.276316	0.199479	0	0	0		gain	3.59125	0.583067	0.850176	0.850176
chr1p13	MYBPHL	0	0	0	0.0943396	0.157895	0.126117	0.122642	0.276316	0.199479	0	0	0		gain	NA	1.70415	2.5013	2.10273
chr1p13	SORT1	0	0	0	0.0943396	0.157895	0.126117	0.122642	0.289474	0.206058	0	0	0		gain	10.3981	4.389	5.21488	5.21488
chr1p13	PSMA5	0	0	0	0.0943396	0.157895	0.126117	0.122642	0.289474	0.206058	0	0	0		gain	-1.19597	-2.69733	-2.89858	-2.69733
chr1p13	SYPL2	0	0	0	0.111111	0.206897	0.159004	0.180556	0.310345	0.24545	0	0	0			-2.42879	-1.17635	0.949629	-1.17635
chr1p13	ATXN7L2	0	0	0	0.111111	0.206897	0.159004	0.180556	0.310345	0.24545	0	0	0			-1.11793	-4.55863	-5.30395	-4.55863
chr1p13	CYB561D1	0	0	0	0.111111	0.206897	0.159004	0.180556	0.310345	0.24545	0	0	0			-3.48557	-1.11291	-1.91817	-1.91817
chr1p13	AMIGO1	0	0	0	0.111111	0.206897	0.159004	0.180556	0.310345	0.24545	0	0	0			-1.92315	1.45325	2.07142	1.45325
chr1p13	GPR61	0	0	0	0.111111	0.206897	0.159004	0.180556	0.310345	0.24545	0	0	0			0.397042	0.194997	2.38147	0.397042
chr1p13	GNAI3	0	0	0	0.111111	0.206897	0.159004	0.180556	0.310345	0.24545	0	0	0			-2.36473	-2.38891	-3.14987	-2.38891
chr1p13	GNAT2	0	0	0	0.111111	0.206897	0.159004	0.180556	0.310345	0.24545	0	0	0			-1.2258	-3.95346	-2.51176	-2.51176
chr1p13	AMPD2	0	0	0	0.111111	0.206897	0.159004	0.180556	0.310345	0.24545	0	0	0			-7.94235	-6.55253	-6.95745	-6.95745
chr1p13	GSTM2	0	0	0	0.1	0.214286	0.157143	0.185714	0.285714	0.235714	0	0	0			1.43873	-0.874337	1.40757	1.40757
chr1p13	GSTM4	0	0	0	0.111111	0.206897	0.159004	0.180556	0.310345	0.24545	0	0	0			3.85994	2.09623	1.48668	2.09623
chr1p13	GSTM1	0	0	0	0.0857143	0.206897	0.146305	0.185714	0.310345	0.24803	0	0	0			1.19819	-0.890754	0.859199	0.859199
chr1p13	GSTM5	0	0	0	0.111111	0.206897	0.159004	0.180556	0.310345	0.24545	0	0	0			0.229867	2.22001	1.53325	1.53325
chr1p13	GSTM3	0	0	0	0.111111	0.206897	0.159004	0.180556	0.310345	0.24545	0	0	0			2.25187	1.64384	3.24002	2.25187
chr1p13	EPS8L3	0	0	0	0.111111	0.206897	0.159004	0.180556	0.310345	0.24545	0	0	0			-2.32391	-0.111836	2.57697	-0.111836
chr1p13	CSF1	0	0	0	0.100917	0.144737	0.122827	0.12844	0.276316	0.202378	0	0.0131579	0.00657895			-5.14263	-2.77447	-2.90789	-2.90789
chr1p13	AHCYL1	0	0	0	0.101852	0.146667	0.124259	0.138889	0.293333	0.216111	0	0.0133333	0.00666666		gain	-2.50991	-0.037666	-1.35608	-1.35608
chr1p13	STRIP1	0	0	0	0.111111	0.172414	0.141762	0.180556	0.310345	0.24545	0	0	0			0.464102	NA	-1.72674	-0.631317
chr1p13	ALX3	0	0	0	0.111111	0.172414	0.141762	0.180556	0.310345	0.24545	0	0	0			-1.94895	1.9975	-1.49842	-1.49842
chr1p13	UBL4B	0	0	0	0.111111	0.172414	0.141762	0.180556	0.310345	0.24545	0	0	0			-0.923688	1.65718	0.822696	0.822696
chr1p13	SLC6A17	0	0	0	0.111111	0.172414	0.141762	0.180556	0.310345	0.24545	0	0	0			2.41168	5.82849	2.70153	2.70153
chr1p13	KCNC4	0	0	0	0.112676	0.172414	0.142545	0.183099	0.310345	0.246722	0	0	0			2.57684	3.79819	2.04182	2.57684
chr1p13	RBM15	0	0.0135135	0.00675675	0.0934579	0.162162	0.12781	0.130841	0.27027	0.200556	0	0.0135135	0.00675675			5.90788	1.25296	-0.299553	1.25296
chr1p13	SLC16A4	0	0	0	0.0934579	0.162162	0.12781	0.130841	0.27027	0.200556	0	0.0135135	0.00675675			-2.62402	-3.65143	-0.0940696	-2.62402
chr1p13	LAMTOR5	0	0	0	0.111111	0.172414	0.141762	0.180556	0.310345	0.24545	0	0	0			-1.32563	NA	0.252968	-0.53633
chr1p13	PROK1	0	0	0	0.111111	0.172414	0.141762	0.180556	0.310345	0.24545	0	0	0			-1.51015	1.42609	-1.43366	-1.43366
chr1p13	KCNA10	0	0	0	0.111111	0.206897	0.159004	0.180556	0.310345	0.24545	0	0	0			-1.0918	0.811015	0.920514	0.811015
chr1p13	KCNA2	0	0	0	0.111111	0.206897	0.159004	0.180556	0.310345	0.24545	0	0	0			-1.39357	1.60727	1.09398	1.09398
chr1p13	KCNA3	0	0	0	0.111111	0.206897	0.159004	0.152778	0.310345	0.231561	0	0	0			3.40106	-0.884014	-1.17517	-0.884014
chr1p13	CD53	0	0	0	0.102804	0.164384	0.133594	0.11215	0.273973	0.193061	0	0	0		gain	-1.84186	-3.5454	-3.1994	-3.1994
chr1p13	LRIF1	0	0	0	0.111111	0.214286	0.162698	0.152778	0.321429	0.237103	0	0	0			4.45123	NA	1.26878	2.86
chr1p13	DRAM2	0	0	0	0.111111	0.206897	0.159004	0.152778	0.275862	0.21432	0	0	0			-0.896636	0.621676	-0.274979	-0.274979
chr1p13	CEPT1	0	0	0	0.111111	0.206897	0.159004	0.152778	0.275862	0.21432	0	0	0			-0.603139	-1.63383	-2.39576	-1.63383
chr1p13	DENND2D	0	0	0	0.111111	0.206897	0.159004	0.152778	0.275862	0.21432	0	0	0			-1.83478	-1.51252	-1.39004	-1.51252
chr1p13	CHI3L2	0	0	0	0.111111	0.206897	0.159004	0.152778	0.275862	0.21432	0	0	0			5.60913	6.1625	3.40754	5.60913
chr1p13	CHIA	0	0	0	0.111111	0.206897	0.159004	0.152778	0.275862	0.21432	0	0	0			-0.439527	4.04828	2.89036	2.89036
chr1p13	PIFO	0	0	0	0.111111	0.206897	0.159004	0.152778	0.275862	0.21432	0	0	0			5.0147	NA	9.81394	7.41432
chr1p13	OVGP1	0	0	0	0.111111	0.206897	0.159004	0.152778	0.275862	0.21432	0	0	0			-0.547994	2.78089	0.0528556	0.0528556
chr1p13	WDR77	0	0	0	0.111111	0.206897	0.159004	0.152778	0.275862	0.21432	0	0	0			-1.9152	-2.04001	-2.18967	-2.04001
chr1p13	C1orf162	0	0	0	0.111111	0.206897	0.159004	0.152778	0.275862	0.21432	0	0	0			-2.66298	-3.53441	-1.88996	-2.66298
chr1p13	ADORA3	0	0	0	0.111111	0.206897	0.159004	0.152778	0.275862	0.21432	0	0	0			-0.0760847	-2.22655	-0.117673	-0.117673
chr1p13	RAP1A	0	0	0	0.100917	0.184211	0.142564	0.100917	0.276316	0.188617	0	0	0		gain	8.78752	8.83543	8.01463	8.78752
chr1p13	DDX20	0	0	0	0.111111	0.206897	0.159004	0.152778	0.275862	0.21432	0	0	0			0.148356	1.04511	-0.0236742	0.148356
chr1p13	KCND3	0	0	0	0.110092	0.184211	0.147151	0.110092	0.289474	0.199783	0	0	0		gain	7.52505	8.73242	10.3633	8.73242
chr1p13	CTTNBP2NL	0	0	0	0.111111	0.2	0.155556	0.111111	0.28	0.195556	0	0	0		gain	1.14871	2.33417	-1.03582	1.14871
chr1p13	WNT2B	0	0	0	0.111111	0.2	0.155556	0.111111	0.28	0.195556	0	0	0		gain	-2.50612	-3.72138	-3.57606	-3.57606
chr1p13	ST7L	0	0.0133333	0.00666666	0.111111	0.2	0.155556	0.111111	0.266667	0.188889	0	0	0		gain	-1.69515	1.58864	0.160875	0.160875
chr1p13	CAPZA1	0	0	0	0.125	0.206897	0.165948	0.152778	0.275862	0.21432	0	0	0			-2.96454	-4.92927	-4.82681	-4.82681
chr1p13	MOV10	0	0	0	0.125	0.206897	0.165948	0.152778	0.275862	0.21432	0	0	0			-0.51744	-3.74329	-5.21148	-3.74329
chr1p13	RHOC	0	0	0	0.125	0.206897	0.165948	0.152778	0.275862	0.21432	0	0	0			-1.7586	-2.5752	-0.872336	-1.7586
chr1p13	PPM1J	0	0	0	0.125	0.206897	0.165948	0.152778	0.275862	0.21432	0	0	0			-0.462458	4.1207	4.21043	4.1207
chr1p13	SLC16A1	0	0	0	0.125	0.206897	0.165948	0.152778	0.275862	0.21432	0	0	0			5.00235	3.6714	3.63627	3.6714
chr1p13	LRIG2	0	0	0	0.110092	0.2	0.155046	0.119266	0.266667	0.192966	0	0.04	0.02		gain	-1.96565	0.368813	-1.60173	-1.60173
chr1p13	MAGI3	0	0	0	0.108911	0.2	0.154455	0.108911	0.271429	0.19017	0	0.0142857	0.00714286		gain	2.35872	4.17107	0.690342	2.35872
chr1p13	PHTF1	0	0	0	0.125	0.214286	0.169643	0.138889	0.25	0.194444	0	0	0			-1.36199	-2.28424	-4.31097	-2.28424
chr1p13	RSBN1	0	0	0	0.125	0.206897	0.165948	0.138889	0.275862	0.207375	0	0	0			1.83829	1.39433	2.26612	1.83829
chr1p13	PTPN22	0	0	0	0.125	0.206897	0.165948	0.138889	0.275862	0.207375	0	0	0			-2.02967	-4.38503	-4.98574	-4.38503
chr1p13	BCL2L15	0	0	0	0.111111	0.206897	0.159004	0.138889	0.275862	0.207375	0	0	0			-1.27816	1.35774	-0.240377	-0.240377
chr1p13	AP4B1	0	0	0	0.111111	0.206897	0.159004	0.138889	0.275862	0.207375	0	0	0			-3.48322	-3.87755	-2.20404	-3.48322
chr1p13	DCLRE1B	0	0	0	0.111111	0.206897	0.159004	0.138889	0.275862	0.207375	0	0	0			0.878559	-0.0985318	-0.770785	-0.0985318
chr1p13	HIPK1	0	0	0	0.125	0.206897	0.165948	0.138889	0.275862	0.207375	0	0	0			0.732295	3.2758	0.371852	0.732295
chr1p13	OLFML3	0	0	0	0.125	0.206897	0.165948	0.138889	0.275862	0.207375	0	0	0			-1.39073	-0.821338	-1.02822	-1.02822
chr1p13	SYT6	0	0	0	0.125	0.206897	0.165948	0.138889	0.275862	0.207375	0	0	0			-1.92861	-3.12608	-2.37748	-2.37748
chr1p13	TRIM33	0	0	0	0.110092	0.184211	0.147151	0.110092	0.289474	0.199783	0	0.0131579	0.00657895		gain	3.01464	3.32909	2.874	3.01464
chr1p13	DENND2C	0	0	0	0.110092	0.171053	0.140572	0.100917	0.289474	0.195196	0	0.0131579	0.00657895		gain	-2.38578	-0.728998	-2.33402	-2.33402
chr1p13	BCAS2	0	0	0	0.111111	0.173333	0.142222	0.101852	0.293333	0.197593	0	0.0133333	0.00666666		gain	3.23794	0.156281	1.17739	1.17739
chr1p13	AMPD1	0	0	0	0.110092	0.173333	0.141713	0.100917	0.306667	0.203792	0	0.0133333	0.00666666		gain	-2.17249	-1.73962	0.296385	-1.73962
chr1p13	NRAS	0	0	0	0.110092	0.173333	0.141713	0.100917	0.306667	0.203792	0	0.0133333	0.00666666		gain	-6.98635	-8.36077	-8.54809	-8.36077
chr1p13	CSDE1	0	0	0	0.110092	0.173333	0.141713	0.100917	0.293333	0.197125	0	0.0133333	0.00666666		gain	1.98586	0.666911	NA	1.32639
chr1p13	SIKE1	0	0	0	0.110092	0.173333	0.141713	0.100917	0.28	0.190459	0	0.0133333	0.00666666		gain	0.285021	-0.53458	-0.614487	-0.53458
chr1p13	SYCP1	0	0	0	0.125	0.206897	0.165948	0.138889	0.275862	0.207375	0	0	0			-0.488279	0.966494	1.09606	0.966494
chr1p13	TSHB	0	0	0	0.125	0.206897	0.165948	0.138889	0.275862	0.207375	0	0	0			0.733783	5.08373	6.81147	5.08373
chr1p13	TSPAN2	0	0	0	0.125	0.214286	0.169643	0.138889	0.285714	0.212302	0	0	0			18.3609	10.2505	9.91664	10.2505
chr1p13	NGF	0	0	0	0.110092	0.171053	0.140572	0.119266	0.328947	0.224107	0	0	0		gain	1.56878	3.47167	2.42465	2.42465
chr1p13	VANGL1	0	0	0	0.114286	0.214286	0.164286	0.142857	0.285714	0.214286	0	0	0			2.59204	4.11292	2.39398	2.59204
chr1p13	CASQ2	0	0	0	0.125	0.206897	0.165948	0.138889	0.275862	0.207375	0	0	0			15.1277	7.10236	13.9289	13.9289
chr1p13	NHLH2	0	0	0	0.125	0.206897	0.165948	0.138889	0.275862	0.207375	0	0	0			-2.20649	0.268681	-2.48224	-2.20649
chr1p13	SLC22A15	0	0	0	0.125	0.206897	0.165948	0.138889	0.275862	0.207375	0	0	0			-1.94545	-1.36449	-3.96521	-1.94545
chr1p13	MAB21L3	0	0	0	0.125	0.214286	0.169643	0.138889	0.285714	0.212302	0	0	0			-1.10894	NA	-0.319251	-0.714094
chr1p13	ATP1A1	0	0	0	0.125	0.214286	0.169643	0.138889	0.285714	0.212302	0	0	0			-2.04409	-1.63994	-1.86855	-1.86855
chr1p13	CD58	0	0	0	0.125	0.214286	0.169643	0.138889	0.285714	0.212302	0	0	0			4.17907	2.97155	4.0858	4.0858
chr1p13	IGSF3	0	0	0	0.110092	0.146667	0.128379	0.137615	0.333333	0.235474	0	0	0		gain	3.60171	3.49812	2.68927	3.49812
chr1p13	CD2	0	0	0	0.110092	0.197368	0.15373	0.119266	0.315789	0.217528	0	0.0131579	0.00657895		gain	0.746687	-0.552187	-0.47618	-0.47618
chr1p13	PTGFRN	0	0	0	0.121495	0.183099	0.152297	0.121495	0.295775	0.208635	0	0.028169	0.0140845		gain	3.71459	6.58011	3.90826	3.90826
chr1p13	CD101	0	0	0	0.121495	0.183099	0.152297	0.11215	0.295775	0.203962	0	0.028169	0.0140845		gain	-0.315388	1.63601	1.03748	1.03748
chr1p13	TTF2	0	0	0	0.125	0.241379	0.18319	0.138889	0.310345	0.224617	0	0	0			0.922164	0.764792	-0.928277	0.764792
chr1p13	TRIM45	0	0	0	0.125	0.241379	0.18319	0.138889	0.310345	0.224617	0	0	0			9.42396	7.37855	5.95028	7.37855
chr1p13	VTCN1	0	0	0	0.125	0.206897	0.165948	0.138889	0.344828	0.241858	0	0	0			1.7846	6.2032	3.59887	3.59887
chr1p12	MAN1A2	0	0	0	0.125	0.214286	0.169643	0.138889	0.321429	0.230159	0	0	0			-1.85895	3.72812	0.831176	0.831176
chr1p12	GDAP2	0	0	0	0.110092	0.162162	0.136127	0.110092	0.297297	0.203695	0	0.0135135	0.00675675		gain	0.458898	1.15857	-0.394318	0.458898
chr1p12	WDR3	0	0	0	0.100917	0.16	0.130459	0.110092	0.293333	0.201713	0	0.0266667	0.0133333		gain	-3.18113	-3.03643	-3.51649	-3.18113
chr1p12	SPAG17	0	0	0	0.100917	0.162162	0.13154	0.12844	0.351351	0.239896	0	0.0135135	0.00675675		gain	-1.26219	0.0972912	-0.369632	-0.369632
chr1p12	TBX15	0	0	0	0.111111	0.206897	0.159004	0.138889	0.344828	0.241858	0	0.0344828	0.0172414			-6.37034	-5.96346	-2.61551	-5.96346
chr1p12	WARS2	0	0	0	0.0841121	0.166667	0.125389	0.121495	0.361111	0.241303	0	0.0277778	0.0138889		gain	-0.571899	0.399809	-2.05229	-0.571899
chr1p12	HAO2	0	0	0	0.0972222	0.206897	0.152059	0.138889	0.310345	0.224617	0	0.0344828	0.0172414			-0.0112677	1.15887	-0.577893	-0.0112677
chr1p12	HSD3B2	0	0	0	0.0972222	0.206897	0.152059	0.138889	0.310345	0.224617	0	0.0344828	0.0172414			-0.382401	-1.54585	-1.82353	-1.54585
chr1p12	HSD3B1	0	0	0	0.0972222	0.172414	0.134818	0.138889	0.310345	0.224617	0	0.0344828	0.0172414			-2.63798	-0.999753	-3.22262	-2.63798
chr1p12	ZNF697	0	0	0	0.0972222	0.172414	0.134818	0.138889	0.310345	0.224617	0	0.0344828	0.0172414			-8.3279	-5.6782	-8.3803	-8.3279
chr1p12	PHGDH	0	0	0	0.0825688	0.126761	0.104665	0.12844	0.352113	0.240277	0	0.028169	0.0140845		gain	2.39356	2.56953	0.859398	2.39356
chr1p12	HMGCS2	0	0	0	0.0825688	0.126761	0.104665	0.12844	0.366197	0.247319	0	0.028169	0.0140845		gain	-1.09495	-0.926909	0.604477	-0.926909
chr1p12	REG4	0	0	0	0.0972222	0.172414	0.134818	0.152778	0.310345	0.231561	0	0.0344828	0.0172414			-1.19675	-2.52311	-1.34863	-1.34863
chr1p12	ADAM30	0	0	0	0.0833333	0.12	0.101667	0.12963	0.426667	0.278148	0	0.0266667	0.0133333		gain	-1.30912	0.18524	-1.19645	-1.19645
chr1p12	NOTCH2	0	0	0	0.0824742	0.123288	0.102881	0.175258	0.479452	0.327355	0	0.0273973	0.0136986		gain	-2.26402	0.683561	-0.993774	-0.993774
chr1p11	FAM72B	0	0	0	0.0857143	0.148148	0.116931	0.285714	0.481481	0.383598	0	0	0			NA	-2.96565	-1.17416	-2.06991
chr1p11	FCGR1B	0	0	0	0.0857143	0.0740741	0.0798942	0.228571	0.481481	0.355026	0	0	0			-2.48107	-3.95063	-3.90738	-3.90738
chr1q21	PPIAL4G	0	0	0	0.0694444	0.0689655	0.069205	0.166667	0.37931	0.272989	0	0	0			NA	-1.30779	-0.413972	-0.86088
chr1q21	FAM72D	0	0	0	0.0714286	0.0714286	0.0714286	0.171429	0.464286	0.317857	0	0	0		gain	NA	-2.24661	0.565652	-0.84048
chr1q21	NBPF20	0	0	0	0.0892857	0.1	0.0946429	0.196429	0.45	0.323214	0	0	0			NA	NA	-2.4179	-2.4179
chr1q21	PDE4DIP	0	0	0	0.0485437	0.031746	0.0401449	0.223301	0.539683	0.381492	0	0	0		gain	-2.45209	-0.432079	-1.67415	-1.67415
chr1q21	SEC22B	0	0	0	0.0694444	0.0689655	0.069205	0.194444	0.517241	0.355843	0	0	0		gain	-2.61538	-2.70712	-4.01534	-2.70712
chr1q21	NBPF10	0	0	0	0.0769231	0.0869565	0.0819398	0.2	0.434783	0.317391	0	0	0			-4.03937	1.03028	-2.60857	-2.60857
chr1q21	TXNIP	0	0	0	0.0560748	0.0526316	0.0543532	0.196262	0.473684	0.334973	0	0.0131579	0.00657895		gain	NA	2.59456	2.25529	2.42492
chr1q21	POLR3GL	0	0	0	0.0560748	0.0526316	0.0543532	0.196262	0.473684	0.334973	0	0.0131579	0.00657895		gain	NA	1.36432	2.66951	2.01692
chr1q21	ANKRD34A	0	0	0	0.0560748	0.0526316	0.0543532	0.196262	0.473684	0.334973	0	0.0131579	0.00657895		gain	0.4351	2.88594	2.75609	2.75609
chr1q21	LIX1L	0	0	0	0.046729	0.0526316	0.0496803	0.196262	0.460526	0.328394	0	0.0263158	0.0131579		gain	-0.745856	1.4294	2.19583	1.4294
chr1q21	RBM8A	0	0	0	0.0694444	0.103448	0.0864464	0.222222	0.482759	0.35249	0	0	0			-0.524307	-3.81944	1.09007	-0.524307
chr1q21	PEX11B	0	0	0	0.046729	0.0526316	0.0496803	0.196262	0.460526	0.328394	0	0.0263158	0.0131579		gain	NA	3.4162	1.08124	2.24872
chr1q21	ITGA10	0	0	0	0.046729	0.0526316	0.0496803	0.196262	0.460526	0.328394	0	0.0263158	0.0131579		gain	-1.68706	-1.50001	-0.547507	-1.50001
chr1q21	ANKRD35	0	0	0	0.046729	0.0526316	0.0496803	0.186916	0.460526	0.323721	0	0.0263158	0.0131579		gain	0.622958	2.21225	2.68346	2.21225
chr1q21	PIAS3	0	0	0	0.046729	0.0526316	0.0496803	0.186916	0.460526	0.323721	0	0.0263158	0.0131579		gain	NA	0.496986	1.05144	0.774213
chr1q21	NUDT17	0	0	0	0.046729	0.0526316	0.0496803	0.186916	0.460526	0.323721	0	0.0263158	0.0131579		gain	NA	0.811446	1.54734	1.17939
chr1q21	POLR3C	0	0	0	0.046729	0.0526316	0.0496803	0.186916	0.447368	0.317142	0	0.0263158	0.0131579		gain	NA	-2.88823	-0.761134	-1.82468
chr1q21	RNF115	0	0	0	0.0458716	0.0526316	0.0492516	0.174312	0.447368	0.31084	0	0.0263158	0.0131579		gain	NA	2.88829	3.36749	3.12789
chr1q21	CD160	0	0	0	0.0462963	0.04	0.0431481	0.185185	0.426667	0.305926	0	0.0266667	0.0133333		gain	-0.11865	0.969009	0.604498	0.604498
chr1q21	PDZK1	0	0	0	0.0462963	0.04	0.0431481	0.185185	0.426667	0.305926	0	0.0266667	0.0133333		gain	-1.01374	-0.652237	-0.901199	-0.901199
chr1q21	GPR89A	0	0	0	0.0471698	0.0405405	0.0438552	0.179245	0.432432	0.305839	0	0.027027	0.0135135		gain	-2.49594	-1.5093	-2.49543	-2.49543
chr1q21	NBPF12	0	0	0	0.0724638	0.0833333	0.0778985	0.202899	0.416667	0.309783	0	0	0			NA	NA	-1.89474	-1.89474
chr1q21	PRKAB2	0	0	0	0.0694444	0.103448	0.0864464	0.222222	0.482759	0.35249	0	0	0			NA	5.04893	3.53369	4.29131
chr1q21	FMO5	0	0	0	0.0694444	0.103448	0.0864464	0.222222	0.482759	0.35249	0	0	0			1.66444	11.3479	7.97675	7.97675
chr1q21	CHD1L	0	0	0	0.0694444	0.103448	0.0864464	0.222222	0.482759	0.35249	0	0	0			0.136366	1.76733	1.42069	1.42069
chr1q21	BCL9	0	0	0	0.0694444	0.103448	0.0864464	0.222222	0.482759	0.35249	0	0	0			1.14476	2.74284	1.86931	1.86931
chr1q21	ACP6	0	0	0	0.0694444	0.103448	0.0864464	0.222222	0.482759	0.35249	0	0	0			5.65529	4.79453	4.63508	4.79453
chr1q21	GJA5	0	0	0	0.0462963	0.04	0.0431481	0.175926	0.453333	0.31463	0	0.0266667	0.0133333		gain	3.2271	5.81991	1.92657	3.2271
chr1q21	GJA8	0	0	0	0.0694444	0.103448	0.0864464	0.222222	0.482759	0.35249	0	0	0			-0.0426167	0.412798	0.979958	0.412798
chr1q21	GPR89B	0	0	0	0.0704225	0.0740741	0.0722483	0.225352	0.481481	0.353417	0	0	0			-2.752	2.43795	-0.123104	-0.123104
chr1q21	NBPF14	0	0	0	0.0704225	0.0714286	0.0709256	0.211268	0.357143	0.284205	0	0	0			NA	2.79229	-5.04072	-1.12422
chr1q21	PPIAL4D	0	0	0	0.0694444	0.0689655	0.069205	0.222222	0.344828	0.283525	0	0	0			NA	-0.562697	NA	-0.562697
chr1q21	NBPF15	0	0	0	0.0724638	0.0689655	0.0707146	0.231884	0.448276	0.34008	0	0	0			NA	-0.332445	-4.1159	-2.22417
chr1q21	FCGR1A	0	0	0	0.0724638	0.0714286	0.0719462	0.231884	0.571429	0.401656	0	0	0		gain	-2.39258	-4.4147	-5.71272	-4.4147
chr1q21	BOLA1	0	0	0	0.0694444	0.0689655	0.069205	0.263889	0.551724	0.407807	0	0	0		gain	2.38293	3.56908	2.75	2.75
chr1q21	SV2A	0	0	0	0.0694444	0.0344828	0.0519636	0.263889	0.586207	0.425048	0.0138889	0	0.00694444		gain	5.7658	4.1313	3.18163	4.1313
chr1q21	SF3B4	0	0	0	0.0277778	0	0.0138889	0.277778	0.551724	0.414751	0.0138889	0	0.00694444		gain	-0.793789	0.664967	-1.05279	-0.793789
chr1q21	MTMR11	0	0	0	0.0277778	0	0.0138889	0.277778	0.551724	0.414751	0.0138889	0	0.00694444		gain	5.04147	7.95342	5.23322	5.23322
chr1q21	OTUD7B	0	0	0	0.0277778	0	0.0138889	0.277778	0.551724	0.414751	0.0138889	0	0.00694444		gain	1.86739	6.46479	0.56101	1.86739
chr1q21	VPS45	0	0	0	0.0277778	0	0.0138889	0.263889	0.551724	0.407807	0.0138889	0	0.00694444		gain	7.48221	6.99665	5.26067	6.99665
chr1q21	PLEKHO1	0	0	0	0.0277778	0	0.0138889	0.277778	0.551724	0.414751	0.0138889	0	0.00694444		gain	5.23808	1.16231	3.52696	3.52696
chr1q21	ANP32E	0	0	0	0.0277778	0	0.0138889	0.277778	0.535714	0.406746	0.0138889	0	0.00694444			5.18087	3.19024	4.02557	4.02557
chr1q21	CA14	0	0	0	0.0277778	0	0.0138889	0.277778	0.517241	0.39751	0.0138889	0.0344828	0.0241858			1.03278	3.4384	3.12102	3.12102
chr1q21	APH1A	0	0	0	0.0277778	0	0.0138889	0.277778	0.517241	0.39751	0.0138889	0.0344828	0.0241858			-10.9468	-9.98657	-10.1894	-10.1894
chr1q21	C1orf54	0	0	0	0.0277778	0	0.0138889	0.277778	0.517241	0.39751	0.0138889	0.0344828	0.0241858			2.20996	3.74804	3.50803	3.50803
chr1q21	MRPS21	0	0	0	0.0277778	0	0.0138889	0.291667	0.517241	0.404454	0.0138889	0.0344828	0.0241858			0.18818	0.144534	0.928058	0.18818
chr1q21	PRPF3	0	0	0	0.0277778	0	0.0138889	0.291667	0.517241	0.404454	0.0138889	0.0344828	0.0241858			-1.30692	2.15333	-0.527291	-0.527291
chr1q21	RPRD2	0	0	0	0.0277778	0	0.0138889	0.291667	0.517241	0.404454	0.0138889	0.0344828	0.0241858			1.63871	4.47202	1.1833	1.63871
chr1q21	TARS2	0	0	0	0.0277778	0	0.0138889	0.291667	0.517241	0.404454	0.0138889	0.0344828	0.0241858			-1.56778	0.0590594	-4.09489	-1.56778
chr1q21	ECM1	0	0	0	0.0277778	0	0.0138889	0.291667	0.517241	0.404454	0.0138889	0.0344828	0.0241858			-6.68263	-3.52829	-3.56818	-3.56818
chr1q21	ADAMTSL4	0	0	0	0.0277778	0	0.0138889	0.291667	0.517241	0.404454	0.0138889	0.0344828	0.0241858			-3.65873	1.0072	-1.35071	-1.35071
chr1q21	MCL1	0	0	0	0.0277778	0	0.0138889	0.291667	0.517241	0.404454	0.0138889	0.0344828	0.0241858			-4.28408	-3.91522	-2.47998	-3.91522
chr1q21	ENSA	0	0	0	0.0277778	0	0.0138889	0.291667	0.517241	0.404454	0.0138889	0.0344828	0.0241858			0.272606	1.76087	1.23384	1.23384
chr1q21	GOLPH3L	0	0	0	0.0138889	0	0.00694444	0.291667	0.517241	0.404454	0.0138889	0.0344828	0.0241858			-4.33126	-3.0865	-4.07297	-4.07297
chr1q21	HORMAD1	0	0	0	0.0138889	0	0.00694444	0.291667	0.535714	0.41369	0.0138889	0	0.00694444			-3.18214	-2.27044	-2.35146	-2.35146
chr1q21	CTSS	0	0	0	0.019802	0	0.00990099	0.207921	0.485714	0.346818	0.00990099	0.0285714	0.0192362		gain	-2.18874	-3.50211	-3.47747	-3.47747
chr1q21	CTSK	0	0	0	0.0192308	0	0.00961538	0.211538	0.478873	0.345206	0.00961538	0.028169	0.0188922		gain	-2.84482	0.650937	-2.21114	-2.21114
chr1q21	ARNT	0	0	0	0.0192308	0	0.00961538	0.211538	0.478873	0.345206	0.00961538	0.028169	0.0188922		gain	-2.69977	0.797745	-2.31488	-2.31488
chr1q21	SETDB1	0	0	0	0.0192308	0	0.00961538	0.211538	0.478873	0.345206	0.00961538	0.028169	0.0188922		gain	-3.07625	0.167498	-2.48131	-2.48131
chr1q21	CERS2	0	0	0	0.0138889	0	0.00694444	0.291667	0.517241	0.404454	0.0138889	0.0344828	0.0241858			-4.74416	NA	-4.23369	-4.48893
chr1q21	ANXA9	0	0	0	0.0138889	0	0.00694444	0.291667	0.535714	0.41369	0.0138889	0.0357143	0.0248016			0.146027	3.40125	0.46819	0.46819
chr1q21	BNIPL	0	0	0	0.0138889	0	0.00694444	0.291667	0.551724	0.421695	0.0138889	0.0344828	0.0241858			-2.21706	-2.0208	-0.751549	-2.0208
chr1q21	C1orf56	0	0	0	0.0138889	0	0.00694444	0.291667	0.551724	0.421695	0.0138889	0.0344828	0.0241858			-3.26789	1.95024	1.52895	1.52895
chr1q21	CDC42SE1	0	0	0	0.0138889	0	0.00694444	0.291667	0.551724	0.421695	0.0138889	0.0344828	0.0241858			-3.37842	-4.7739	-5.09684	-4.7739
chr1q21	MLLT11	0	0	0	0.0138889	0	0.00694444	0.291667	0.551724	0.421695	0.0138889	0.0344828	0.0241858			-0.33806	-0.808743	0.284162	-0.33806
chr1q21	GABPB2	0	0	0	0.0138889	0	0.00694444	0.291667	0.551724	0.421695	0.0138889	0.0344828	0.0241858			1.17604	2.52701	0.944851	1.17604
chr1q21	SEMA6C	0	0	0	0.0138889	0	0.00694444	0.291667	0.551724	0.421695	0.0138889	0.0344828	0.0241858			-2.82377	-1.15457	-1.46977	-1.46977
chr1q21	TNFAIP8L2	0	0	0	0.0138889	0	0.00694444	0.291667	0.551724	0.421695	0.0138889	0.0344828	0.0241858			-3.19022	-3.26445	-3.16365	-3.19022
chr1q21	LYSMD1	0	0	0	0.0138889	0	0.00694444	0.291667	0.551724	0.421695	0.0138889	0.0344828	0.0241858			-0.394283	1.61998	0.4475	0.4475
chr1q21	SCNM1	0	0	0	0.0138889	0	0.00694444	0.291667	0.551724	0.421695	0.0138889	0.0344828	0.0241858			-3.18409	-1.69932	-2.36953	-2.36953
chr1q21	TMOD4	0	0	0	0.0138889	0	0.00694444	0.291667	0.551724	0.421695	0.0138889	0.0344828	0.0241858			-2.37076	-1.14841	0.234866	-1.14841
chr1q21	VPS72	0	0	0	0.0138889	0	0.00694444	0.291667	0.551724	0.421695	0.0138889	0.0344828	0.0241858			-1.90229	-1.25824	-0.511043	-1.25824
chr1q21	PIP5K1A	0	0	0	0.0138889	0	0.00694444	0.291667	0.551724	0.421695	0.0138889	0.0344828	0.0241858			-1.33586	0.254751	-1.94065	-1.33586
chr1q21	PSMD4	0	0	0	0.0138889	0	0.00694444	0.291667	0.551724	0.421695	0.0138889	0.0344828	0.0241858			-0.86401	-1.54021	1.04599	-0.86401
chr1q21	ZNF687	0	0	0	0.0138889	0	0.00694444	0.291667	0.551724	0.421695	0.0138889	0.0344828	0.0241858			-0.0608402	2.52065	-1.84816	-0.0608402
chr1q21	PI4KB	0	0	0	0.0185185	0	0.00925926	0.222222	0.479452	0.350837	0.00925926	0.0273973	0.0183283		gain	-4.37717	0.162137	-2.27861	-2.27861
chr1q21	RFX5	0	0	0	0.0185185	0	0.00925926	0.212963	0.465753	0.339358	0.00925926	0.0273973	0.0183283		gain	6.8552	5.90668	3.57533	5.90668
chr1q21	SELENBP1	0	0	0	0.0185185	0	0.00925926	0.212963	0.465753	0.339358	0.00925926	0.0273973	0.0183283		gain	7.76348	7.28913	4.8745	7.28913
chr1q21	PSMB4	0	0	0	0.0185185	0	0.00925926	0.212963	0.479452	0.346208	0.00925926	0.0273973	0.0183283		gain	-3.17528	-1.51247	0.0757838	-1.51247
chr1q21	POGZ	0	0	0	0.0185185	0	0.00925926	0.212963	0.479452	0.346208	0.00925926	0.0273973	0.0183283		gain	-0.25241	1.88245	0.143201	0.143201
chr1q21	CGN	0	0	0	0.0185185	0	0.00925926	0.212963	0.493151	0.353057	0.00925926	0.0273973	0.0183283		gain	1.70881	4.3448	5.23182	4.3448
chr1q21	TUFT1	0	0	0	0.0185185	0	0.00925926	0.212963	0.493151	0.353057	0.00925926	0.0273973	0.0183283		gain	0.539417	2.85968	1.0074	1.0074
chr1q21	SNX27	0	0	0	0.0185185	0	0.00925926	0.222222	0.486486	0.354354	0.00925926	0.027027	0.0181431		gain	-2.4411	1.2885	-2.13596	-2.13596
chr1q21	CELF3	0	0	0	0.0185185	0	0.00925926	0.222222	0.486486	0.354354	0.00925926	0.027027	0.0181431		gain	1.48063	9.65929	2.83769	2.83769
chr1q21	RIIAD1	0	0	0	0.0138889	0	0.00694444	0.277778	0.551724	0.414751	0.0138889	0.0344828	0.0241858		gain	3.51924	NA	5.00141	4.26033
chr1q21	MRPL9	0	0	0	0.0185185	0	0.00925926	0.212963	0.486486	0.349725	0.00925926	0.027027	0.0181431		gain	-3.35469	-1.51272	-1.14314	-1.51272
chr1q21	OAZ3	0	0	0	0.0185185	0	0.00925926	0.212963	0.486486	0.349725	0.00925926	0.027027	0.0181431		gain	-1.45476	-1.49268	-0.685414	-1.45476
chr1q21	TDRKH	0	0	0	0.0185185	0	0.00925926	0.212963	0.486486	0.349725	0.00925926	0.027027	0.0181431		gain	-1.12916	-0.335286	-1.59678	-1.12916
chr1q21	LINGO4	0	0	0	0.0185185	0	0.00925926	0.212963	0.472973	0.342968	0.00925926	0.0405405	0.0248999		gain	NA	-0.749006	2.50349	0.87724
chr1q21	RORC	0	0	0	0.0185185	0	0.00925926	0.212963	0.472973	0.342968	0.00925926	0.0405405	0.0248999		gain	-0.231575	0.127648	1.45379	0.127648
chr1q21	C2CD4D	0	0	0	0.0138889	0	0.00694444	0.277778	0.551724	0.414751	0.0138889	0.0344828	0.0241858		gain	NA	1.31744	-1.38336	-0.0329584
chr1q21	THEM5	0	0	0	0.0138889	0	0.00694444	0.277778	0.551724	0.414751	0.0138889	0.0344828	0.0241858		gain	-0.347098	0.317552	-0.511721	-0.347098
chr1q21	THEM4	0	0	0	0.0140845	0	0.00704225	0.253521	0.551724	0.402623	0.0140845	0.0344828	0.0242836		gain	-4.90322	-3.13771	-3.42169	-3.42169
chr1q21	S100A10	0	0	0	0.0138889	0	0.00694444	0.25	0.535714	0.392857	0.0138889	0.0357143	0.0248016		gain	-6.0159	-4.58472	-5.59997	-5.59997
chr1q21	S100A11	0	0	0	0.0138889	0	0.00694444	0.25	0.517241	0.383621	0.0138889	0.0344828	0.0241858			-7.01424	-4.62775	-6.57472	-6.57472
chr1q21	TCHHL1	0	0	0	0.0138889	0	0.00694444	0.25	0.517241	0.383621	0.0138889	0.0344828	0.0241858			NA	1.43048	-1.36687	0.0318017
chr1q21	TCHH	0	0	0	0.0138889	0	0.00694444	0.25	0.517241	0.383621	0.0138889	0.0344828	0.0241858			-1.72396	-0.708239	-1.53999	-1.53999
chr1q21	RPTN	0	0	0	0.0138889	0	0.00694444	0.25	0.517241	0.383621	0.0138889	0.0344828	0.0241858			-1.11476	-2.08593	-1.89119	-1.89119
chr1q21	HRNR	0	0	0	0.0147059	0	0.00735294	0.235294	0.52	0.377647	0.0147059	0	0.00735294		gain	NA	2.55053	-0.627115	0.961708
chr1q21	FLG	0	0	0	0.0138889	0	0.00694444	0.25	0.517241	0.383621	0.0138889	0	0.00694444			-1.61214	1.48029	-0.352799	-0.352799
chr1q21	FLG2	0	0	0	0.0138889	0	0.00694444	0.25	0.517241	0.383621	0.0138889	0	0.00694444			-0.903039	0.879668	-0.167869	-0.167869
chr1q21	CRNN	0	0	0	0.0138889	0	0.00694444	0.25	0.517241	0.383621	0.0138889	0	0.00694444			2.77342	-0.835614	-1.20755	-0.835614
chr1q21	LCE5A	0	0	0	0.0138889	0	0.00694444	0.25	0.517241	0.383621	0.0138889	0	0.00694444			NA	0.203034	0.873594	0.538314
chr1q21	CRCT1	0	0	0	0.0384615	0.015873	0.0271673	0.201923	0.507937	0.35493	0.00961538	0.031746	0.0206807		gain	0.591872	-1.81368	-0.0927675	-0.0927675
chr1q21	LCE3E	0	0	0	0.0384615	0.015873	0.0271673	0.201923	0.507937	0.35493	0.00961538	0.031746	0.0206807		gain	NA	-1	1	0
chr1q21	LCE3D	0	0.015873	0.00793651	0.0480769	0.015873	0.031975	0.192308	0.492063	0.342186	0.00961538	0.031746	0.0206807		gain	-1.93662	-1.90027	0.845713	-1.90027
chr1q21	LCE3C	0	0	0	0.0277778	0	0.0138889	0.236111	0.551724	0.393918	0.0138889	0	0.00694444		gain	NA	NA	NA	NA
chr1q21	LCE3B	0	0	0	0.0277778	0	0.0138889	0.25	0.551724	0.400862	0.0138889	0	0.00694444		gain	NA	-1	NA	-1
chr1q21	LCE3A	0	0	0	0.0138889	0	0.00694444	0.25	0.517241	0.383621	0.0138889	0	0.00694444			NA	-2.01505	-1	-1.50752
chr1q21	LCE2D	0	0	0	0.0138889	0	0.00694444	0.25	0.517241	0.383621	0.0138889	0	0.00694444			NA	NA	-0.397046	-0.397046
chr1q21	LCE2C	0	0	0	0.0138889	0	0.00694444	0.25	0.517241	0.383621	0.0138889	0	0.00694444			NA	1.42772	-1	0.213861
chr1q21	LCE2B	0	0	0	0.0138889	0	0.00694444	0.25	0.517241	0.383621	0.0138889	0	0.00694444			-1.19394	NA	-1	-1.09697
chr1q21	LCE2A	0	0	0	0.0138889	0	0.00694444	0.25	0.517241	0.383621	0.0138889	0	0.00694444			NA	-1.10695	-1.05775	-1.08235
chr1q21	LCE4A	0	0	0	0.0138889	0	0.00694444	0.25	0.517241	0.383621	0.0138889	0	0.00694444			NA	NA	-1	-1
chr1q21	C1orf68	0	0	0	0.0138889	0	0.00694444	0.25	0.517241	0.383621	0.0138889	0	0.00694444			-0.605936	1.95527	1.23293	1.23293
chr1q21	KPRP	0	0	0	0.0138889	0	0.00694444	0.25	0.517241	0.383621	0.0138889	0	0.00694444			NA	-1.25096	1.74045	0.244745
chr1q21	LCE1F	0	0	0	0.0138889	0	0.00694444	0.25	0.517241	0.383621	0.0138889	0	0.00694444			NA	1	NA	1
chr1q21	LCE1E	0	0	0	0.0138889	0	0.00694444	0.25	0.517241	0.383621	0.0138889	0	0.00694444			2.24268	0.419714	1.32008	1.32008
chr1q21	LCE1D	0	0	0	0.0138889	0	0.00694444	0.25	0.5	0.375	0.0138889	0	0.00694444			NA	NA	1	1
chr1q21	LCE1C	0	0	0	0.0138889	0	0.00694444	0.25	0.517241	0.383621	0.0138889	0	0.00694444			NA	0.323258	1.41294	0.868101
chr1q21	LCE1B	0	0	0	0.0138889	0	0.00694444	0.25	0.517241	0.383621	0.0138889	0	0.00694444			-1.53261	-0.498382	-1	-1
chr1q21	LCE1A	0	0	0	0.0138889	0	0.00694444	0.25	0.517241	0.383621	0.0138889	0	0.00694444			NA	-1	NA	-1
chr1q21	LCE6A	0	0	0	0.0138889	0	0.00694444	0.25	0.517241	0.383621	0.0138889	0	0.00694444			NA	-0.340023	NA	-0.340023
chr1q21	SMCP	0	0	0	0.0138889	0	0.00694444	0.25	0.517241	0.383621	0.0138889	0	0.00694444			-0.753893	-1.23325	NA	-0.993571
chr1q21	IVL	0	0	0	0.0138889	0	0.00694444	0.25	0.517241	0.383621	0.0138889	0	0.00694444			-1.33101	-1.50042	-0.329965	-1.33101
chr1q21	SPRR4	0	0	0	0.0138889	0	0.00694444	0.25	0.517241	0.383621	0.0138889	0	0.00694444			0.0347245	-0.732205	1	0.0347245
chr1q21	SPRR1A	0	0	0	0.0138889	0	0.00694444	0.25	0.517241	0.383621	0.0138889	0	0.00694444			-0.941584	-0.768741	1.78599	-0.768741
chr1q21	SPRR3	0	0	0	0.0138889	0	0.00694444	0.25	0.517241	0.383621	0.0138889	0	0.00694444			-2.02764	-0.977385	0.517372	-0.977385
chr1q21	SPRR1B	0	0	0	0.0138889	0	0.00694444	0.25	0.517241	0.383621	0.0138889	0	0.00694444			1.27346	-0.729593	1.17903	1.17903
chr1q21	SPRR2D	0	0	0	0.0138889	0	0.00694444	0.25	0.517241	0.383621	0.0138889	0	0.00694444			NA	-1.41704	-0.477905	-0.947474
chr1q21	SPRR2A	0	0	0	0.0138889	0	0.00694444	0.25	0.517241	0.383621	0.0138889	0	0.00694444			NA	-1.16394	-1.34618	-1.25506
chr1q21	SPRR2B	0	0	0	0.0138889	0	0.00694444	0.25	0.517241	0.383621	0.0138889	0	0.00694444			-3.63995	-1.31744	-1	-1.31744
chr1q21	SPRR2E	0	0	0	0.0138889	0	0.00694444	0.25	0.517241	0.383621	0.0138889	0	0.00694444			NA	-1.34168	-0.990839	-1.16626
chr1q21	SPRR2F	0	0	0	0.0138889	0	0.00694444	0.25	0.517241	0.383621	0.0138889	0	0.00694444			NA	-2.07822	-0.988732	-1.53347
chr1q21	SPRR2G	0	0	0	0.0138889	0	0.00694444	0.25	0.517241	0.383621	0.0138889	0	0.00694444			-1.33632	-2.473	-1.29079	-1.33632
chr1q21	LELP1	0	0	0	0.0138889	0	0.00694444	0.25	0.517241	0.383621	0.0138889	0	0.00694444			-0.175102	-1	1	-0.175102
chr1q21	PRR9	0	0	0	0.0138889	0	0.00694444	0.25	0.517241	0.383621	0.0138889	0	0.00694444			-2.57942	NA	-0.438335	-1.50888
chr1q21	LOR	0	0	0	0.0138889	0	0.00694444	0.25	0.517241	0.383621	0.0138889	0	0.00694444			-0.141791	-1.24455	-1.16721	-1.16721
chr1q21	PGLYRP3	0	0	0	0.0138889	0	0.00694444	0.25	0.517241	0.383621	0.0138889	0	0.00694444			-1.36567	-0.373493	-1	-1
chr1q21	PGLYRP4	0	0	0	0.0144928	0	0.00724638	0.26087	0.517241	0.389055	0.0144928	0	0.00724638			-0.848581	-0.957298	0.092073	-0.848581
chr1q21	S100A9	0	0	0	0.0138889	0	0.00694444	0.291667	0.517241	0.404454	0.0138889	0	0.00694444			-2.62373	-2.54841	-2.70505	-2.62373
chr1q21	S100A12	0	0	0	0.0138889	0	0.00694444	0.291667	0.517241	0.404454	0.0138889	0	0.00694444			-1.14687	0.949355	0.688418	0.688418
chr1q21	S100A8	0	0	0	0.0138889	0	0.00694444	0.291667	0.517241	0.404454	0.0138889	0	0.00694444			-1.364	-1.1903	0.322373	-1.1903
chr1q21	S100A7A	0	0	0	0.0138889	0	0.00694444	0.291667	0.517241	0.404454	0.0138889	0	0.00694444			-0.389572	-0.744053	-0.965364	-0.744053
chr1q21	S100A7L2	0	0	0	0.0138889	0	0.00694444	0.291667	0.517241	0.404454	0.0138889	0	0.00694444			NA	NA	NA	NA
chr1q21	S100A7	0	0	0	0.0138889	0	0.00694444	0.291667	0.517241	0.404454	0.0138889	0	0.00694444			-1.79513	0.7647	3.37229	0.7647
chr1q21	S100A6	0	0	0	0.0138889	0	0.00694444	0.305556	0.551724	0.42864	0.0138889	0	0.00694444			-0.471907	0.357993	0.525969	0.357993
chr1q21	S100A5	0	0	0	0.0138889	0	0.00694444	0.305556	0.551724	0.42864	0.0138889	0	0.00694444			-1.17833	-4.09688	1.75042	-1.17833
chr1q21	S100A4	0	0	0	0.0138889	0	0.00694444	0.305556	0.551724	0.42864	0.0138889	0	0.00694444			-7.63757	-3.54753	-6.15614	-6.15614
chr1q21	S100A3	0	0	0	0.0138889	0	0.00694444	0.305556	0.551724	0.42864	0.0138889	0	0.00694444			-3.67428	-1.31956	-3.78455	-3.67428
chr1q21	S100A2	0	0	0	0.0138889	0	0.00694444	0.305556	0.551724	0.42864	0.0138889	0	0.00694444			-1.44752	-0.602019	-0.233979	-0.602019
chr1q21	S100A16	0	0	0	0.0138889	0	0.00694444	0.305556	0.551724	0.42864	0.0138889	0	0.00694444			-4.48267	-0.971096	-2.34818	-2.34818
chr1q21	S100A14	0	0	0	0.0138889	0	0.00694444	0.305556	0.551724	0.42864	0.0138889	0	0.00694444			-1.37911	-0.163095	0.145037	-0.163095
chr1q21	S100A13	0	0	0	0.0138889	0	0.00694444	0.305556	0.551724	0.42864	0.0138889	0	0.00694444			-4.49952	-2.60581	-1.8007	-2.60581
chr1q21	S100A1	0	0	0	0.0138889	0	0.00694444	0.305556	0.551724	0.42864	0.0138889	0	0.00694444			-2.52784	-1.73388	0.235244	-1.73388
chr1q21	CHTOP	0	0	0	0.0138889	0	0.00694444	0.305556	0.551724	0.42864	0.0277778	0	0.0138889			-1.79673	NA	-0.490046	-1.14339
chr1q21	SNAPIN	0	0	0	0.0138889	0	0.00694444	0.305556	0.551724	0.42864	0.0277778	0	0.0138889			5.1596	5.30295	4.01578	5.1596
chr1q21	ILF2	0	0	0	0.0138889	0	0.00694444	0.305556	0.551724	0.42864	0.0277778	0	0.0138889			-4.39373	-4.18892	-3.57946	-4.18892
chr1q21	NPR1	0	0	0	0.0138889	0	0.00694444	0.305556	0.551724	0.42864	0.0277778	0	0.0138889			-0.17032	4.20478	1.59019	1.59019
chr1q21	INTS3	0	0	0	0.0138889	0	0.00694444	0.305556	0.551724	0.42864	0.0138889	0	0.00694444			0.815932	3.41693	1.09284	1.09284
chr1q21	SLC27A3	0	0	0	0.0138889	0	0.00694444	0.305556	0.551724	0.42864	0.0138889	0	0.00694444			3.87564	3.74796	2.65233	3.74796
chr1q21	GATAD2B	0	0	0	0.0138889	0	0.00694444	0.305556	0.551724	0.42864	0.0138889	0	0.00694444			0.981491	3.67625	0.595652	0.981491
chr1q21	DENND4B	0	0	0	0.0138889	0	0.00694444	0.305556	0.551724	0.42864	0.0138889	0	0.00694444			-4.9069	-2.90913	-4.87103	-4.87103
chr1q21	CRTC2	0	0	0	0.0138889	0	0.00694444	0.305556	0.551724	0.42864	0.0138889	0	0.00694444			-5.19623	-0.275375	-1.28909	-1.28909
chr1q21	SLC39A1	0	0	0	0.0138889	0	0.00694444	0.305556	0.551724	0.42864	0.0138889	0	0.00694444			-3.1392	-2.064	-2.41314	-2.41314
chr1q21	CREB3L4	0	0	0	0.0138889	0	0.00694444	0.305556	0.551724	0.42864	0.0138889	0	0.00694444			3.01291	3.93514	2.77585	3.01291
chr1q21	JTB	0	0	0	0.0138889	0	0.00694444	0.305556	0.551724	0.42864	0.0138889	0	0.00694444			-8.27153	-3.21505	-3.12608	-3.21505
chr1q21	RAB13	0	0	0	0.0138889	0	0.00694444	0.305556	0.551724	0.42864	0.0138889	0	0.00694444			-3.5409	-1.25706	-1.2876	-1.2876
chr1q21	RPS27	0	0	0	0.0138889	0	0.00694444	0.305556	0.551724	0.42864	0.0138889	0	0.00694444			1.19542	-0.842417	2.96979	1.19542
chr1q21	NUP210L	0	0	0	0.0140845	0	0.00704225	0.295775	0.551724	0.423749	0.0140845	0	0.00704225			1.28174	1.55171	2.64278	1.55171
chr1q21	TPM3	0	0	0	0.0138889	0	0.00694444	0.305556	0.551724	0.42864	0.0138889	0	0.00694444			-12.466	-7.97932	-10.7028	-10.7028
chr1q21	C1orf189	0	0	0	0.0138889	0	0.00694444	0.305556	0.517241	0.411398	0.0138889	0	0.00694444			NA	0.20599	0.860654	0.533322
chr1q21	C1orf43	0	0	0	0.0138889	0	0.00694444	0.305556	0.517241	0.411398	0.0138889	0	0.00694444			-0.881728	-0.564026	1.1529	-0.564026
chr1q21	UBAP2L	0	0	0	0.0138889	0	0.00694444	0.305556	0.517241	0.411398	0.0138889	0	0.00694444			-3.88971	-0.949344	-3.80308	-3.80308
chr1q21	HAX1	0	0	0	0.0138889	0	0.00694444	0.305556	0.517241	0.411398	0.0138889	0	0.00694444			3.00282	3.55085	4.81203	3.55085
chr1q21	AQP10	0	0	0	0.0138889	0	0.00694444	0.305556	0.517241	0.411398	0.0138889	0	0.00694444			-0.735118	4.7951	1.51516	1.51516
chr1q21	ATP8B2	0	0	0	0.0138889	0	0.00694444	0.305556	0.517241	0.411398	0.0138889	0	0.00694444			1.4386	4.78935	1.85384	1.85384
chr1q21	IL6R	0	0	0	0.0138889	0	0.00694444	0.305556	0.517241	0.411398	0.0138889	0	0.00694444			6.32804	5.7037	5.16031	5.7037
chr1q21	SHE	0	0	0	0.0138889	0	0.00694444	0.305556	0.517241	0.411398	0	0	0			-3.31296	0.510421	-2.78848	-2.78848
chr1q21	TDRD10	0	0	0	0.0138889	0	0.00694444	0.305556	0.517241	0.411398	0	0	0			-1.6865	-0.848601	-1.65652	-1.65652
chr1q21	UBE2Q1	0	0	0	0.0138889	0	0.00694444	0.305556	0.517241	0.411398	0	0	0			-5.3209	-5.16846	-3.40901	-5.16846
chr1q21	CHRNB2	0	0	0	0.0138889	0	0.00694444	0.305556	0.517241	0.411398	0	0	0			-0.171726	-1.69832	-0.281089	-0.281089
chr1q21	ADAR	0	0	0	0.0138889	0	0.00694444	0.305556	0.517241	0.411398	0	0	0			-2.58729	0.123904	-3.2274	-2.58729
chr1q21	KCNN3	0	0	0	0.00970874	0	0.00485437	0.252427	0.465753	0.35909	0	0.0410959	0.0205479		gain	-3.71231	-1.52812	-2.5408	-2.5408
chr1q21	PMVK	0	0	0	0.00961538	0	0.00480769	0.25	0.432432	0.341216	0	0.0405405	0.0202703		gain	5.22222	2.28003	3.94712	3.94712
chr1q21	PBXIP1	0	0	0	0.00961538	0	0.00480769	0.25	0.432432	0.341216	0	0.0405405	0.0202703		gain	5.57921	9.05225	7.70377	7.70377
chr1q21	PYGO2	0	0	0	0.0138889	0	0.00694444	0.319444	0.517241	0.418343	0	0	0			-0.762324	4.22044	1.11345	1.11345
chr1q21	SHC1	0	0	0	0.00961538	0	0.00480769	0.25	0.432432	0.341216	0	0.0405405	0.0202703		gain	-2.17464	-0.271714	-1.83412	-1.83412
chr1q21	CKS1B	0	0	0	0	0	0	0.09375	0.377778	0.235764	0	0.0666667	0.0333333		gain	0.23429	-1.08938	1.01645	0.23429
chr1q21	FLAD1	0	0	0	0.00961538	0	0.00480769	0.25	0.432432	0.341216	0	0.0405405	0.0202703		gain	-2.23913	-2.67276	-3.15913	-2.67276
chr1q21	LENEP	0	0	0	0.0138889	0	0.00694444	0.305556	0.517241	0.411398	0	0	0			-1.87232	2.94595	1.81471	1.81471
chr1q21	ZBTB7B	0	0	0	0.00961538	0	0.00480769	0.240385	0.432432	0.336409	0	0.0405405	0.0202703		gain	3.05255	6.57532	4.10976	4.10976
chr1q21	DCST2	0	0	0	0.0138889	0	0.00694444	0.305556	0.517241	0.411398	0	0	0			0.495651	10.3743	5.7511	5.7511
chr1q22	DCST1	0	0	0	0.0138889	0	0.00694444	0.305556	0.517241	0.411398	0	0	0			0.782551	5.2042	3.16378	3.16378
chr1q22	ADAM15	0	0	0	0.0138889	0	0.00694444	0.305556	0.517241	0.411398	0	0	0			-1.19612	3.26681	0.671941	0.671941
chr1q22	EFNA3	0	0	0	0.0138889	0	0.00694444	0.305556	0.517241	0.411398	0	0	0			-2.34382	-3.1663	-1.84221	-2.34382
chr1q22	EFNA4	0	0	0	0.0138889	0	0.00694444	0.305556	0.517241	0.411398	0	0	0			-8.65209	-7.86394	-5.39387	-7.86394
chr1q22	EFNA1	0	0	0	0.0138889	0	0.00694444	0.305556	0.517241	0.411398	0	0	0			-3.34888	-0.797404	-2.33259	-2.33259
chr1q22	SLC50A1	0	0	0	0.0138889	0	0.00694444	0.305556	0.517241	0.411398	0	0	0			-0.302076	NA	-3.0859	-1.69399
chr1q22	DPM3	0	0	0	0.0138889	0	0.00694444	0.305556	0.517241	0.411398	0	0	0			0.6419	-0.173803	0.71328	0.6419
chr1q22	KRTCAP2	0	0	0	0.0138889	0	0.00694444	0.305556	0.517241	0.411398	0	0	0			-3.08885	-2.07071	-2.57446	-2.57446
chr1q22	TRIM46	0	0	0	0.0138889	0	0.00694444	0.305556	0.517241	0.411398	0	0	0			4.74502	9.28347	3.74863	4.74502
chr1q22	MUC1	0	0	0	0.0138889	0	0.00694444	0.305556	0.517241	0.411398	0	0	0			9.62644	9.59537	4.63667	9.59537
chr1q22	THBS3	0	0	0	0.0138889	0	0.00694444	0.305556	0.517241	0.411398	0	0	0			1.29363	2.14341	3.88672	2.14341
chr1q22	MTX1	0	0	0	0.0138889	0	0.00694444	0.305556	0.517241	0.411398	0	0	0			-5.23428	-3.31476	-2.67155	-3.31476
chr1q22	GBA	0	0	0	0.0138889	0	0.00694444	0.305556	0.517241	0.411398	0	0	0			-1.27222	0.272021	-1.41617	-1.27222
chr1q22	FAM189B	0	0	0	0.0138889	0	0.00694444	0.305556	0.517241	0.411398	0	0	0			-2.28613	-0.779321	-0.844679	-0.844679
chr1q22	SCAMP3	0	0	0	0.0138889	0	0.00694444	0.305556	0.517241	0.411398	0	0	0			-6.62011	-4.35054	-4.67712	-4.67712
chr1q22	CLK2	0	0	0	0.0138889	0	0.00694444	0.305556	0.517241	0.411398	0	0	0			-2.43381	1.72809	0.310186	0.310186
chr1q22	HCN3	0	0	0	0.0138889	0	0.00694444	0.305556	0.517241	0.411398	0	0	0			-0.691994	3.63605	0.284377	0.284377
chr1q22	PKLR	0	0	0	0.0138889	0	0.00694444	0.305556	0.517241	0.411398	0	0	0			-2.26932	-0.654542	0.657256	-0.654542
chr1q22	FDPS	0	0	0	0.0138889	0	0.00694444	0.305556	0.517241	0.411398	0	0	0			1.86665	-0.731488	-0.605646	-0.605646
chr1q22	RUSC1	0	0	0	0.0140845	0	0.00704225	0.295775	0.517241	0.406508	0	0	0			3.33826	4.78775	2.92221	3.33826
chr1q22	ASH1L	0	0	0	0.0138889	0	0.00694444	0.305556	0.551724	0.42864	0	0	0			0.439908	4.76758	1.46157	1.46157
chr1q22	MSTO1	0	0	0	0.0140845	0	0.00704225	0.309859	0.535714	0.422787	0	0	0			-4.13023	-3.66674	-5.74412	-4.13023
chr1q22	YY1AP1	0	0	0	0.0138889	0	0.00694444	0.305556	0.551724	0.42864	0	0	0			1.68486	3.719	1.80078	1.80078
chr1q22	DAP3	0	0	0	0.0138889	0	0.00694444	0.305556	0.551724	0.42864	0	0	0			-5.07408	-3.73921	-2.27405	-3.73921
chr1q22	GON4L	0	0	0	0.0138889	0	0.00694444	0.305556	0.551724	0.42864	0	0	0			-5.14352	2.3751	-1.57299	-1.57299
chr1q22	SYT11	0	0	0	0.0138889	0	0.00694444	0.305556	0.551724	0.42864	0	0	0			6.96104	7.15755	4.15293	6.96104
chr1q22	RIT1	0	0	0	0.0138889	0	0.00694444	0.305556	0.551724	0.42864	0	0	0			0.655966	1.62227	2.0975	1.62227
chr1q22	RXFP4	0	0	0	0.0138889	0.0344828	0.0241858	0.319444	0.551724	0.435584	0	0	0			NA	0.184276	0.877827	0.531051
chr1q22	ARHGEF2	0	0	0	0.0138889	0	0.00694444	0.319444	0.571429	0.445437	0	0	0			-1.53859	2.05364	0.68955	0.68955
chr1q22	SSR2	0	0	0	0.0138889	0.0344828	0.0241858	0.319444	0.551724	0.435584	0	0	0			-8.88293	-6.47386	-4.05581	-6.47386
chr1q22	UBQLN4	0	0	0	0.0138889	0.0344828	0.0241858	0.319444	0.551724	0.435584	0	0	0			-1.93128	-0.601599	-0.934331	-0.934331
chr1q22	LAMTOR2	0	0	0	0.0138889	0.0344828	0.0241858	0.319444	0.551724	0.435584	0	0	0			-2.77057	NA	-0.444635	-1.6076
chr1q22	RAB25	0	0	0	0.0138889	0.0344828	0.0241858	0.319444	0.551724	0.435584	0	0	0			-0.499606	-2.07649	-0.973421	-0.973421
chr1q22	MEX3A	0	0	0	0.0138889	0.0344828	0.0241858	0.319444	0.551724	0.435584	0	0	0			-5.8251	-7.53715	-6.58616	-6.58616
chr1q22	LMNA	0	0	0	0.0138889	0	0.00694444	0.319444	0.571429	0.445437	0	0	0			-4.06431	-1.90911	-1.84353	-1.90911
chr1q22	SEMA4A	0	0	0	0.0138889	0	0.00694444	0.319444	0.586207	0.452826	0	0	0			0.539881	-0.797664	-2.09369	-0.797664
chr1q22	SLC25A44	0	0	0	0.0138889	0	0.00694444	0.319444	0.571429	0.445437	0	0	0			-2.22304	-3.7868	-2.08803	-2.22304
chr1q22	PMF1	0	0	0	0.0138889	0.0344828	0.0241858	0.319444	0.551724	0.435584	0	0	0			-3.28974	-3.42616	-1.97102	-3.28974
chr1q22	BGLAP	0	0	0	0.0138889	0.0344828	0.0241858	0.319444	0.551724	0.435584	0	0	0			-2.59803	-4.45087	-1.02861	-2.59803
chr1q22	PAQR6	0	0	0	0.0138889	0.0344828	0.0241858	0.319444	0.551724	0.435584	0	0	0			-2.82061	-4.18962	-3.63455	-3.63455
chr1q22	SMG5	0	0	0	0.0138889	0.0344828	0.0241858	0.319444	0.551724	0.435584	0	0	0			-0.39333	0.307731	-0.562439	-0.39333
chr1q22	TMEM79	0	0	0	0.0138889	0	0.00694444	0.319444	0.571429	0.445437	0	0	0			-2.28168	0.366506	-2.66403	-2.28168
chr1q22	VHLL	0	0	0	0.0138889	0	0.00694444	0.319444	0.586207	0.452826	0	0	0			NA	1.36437	0.456558	0.910464
chr1q22	CCT3	0	0	0	0.0138889	0	0.00694444	0.319444	0.586207	0.452826	0	0	0			-2.65796	-2.3488	-0.509554	-2.3488
chr1q22	TSACC	0	0	0	0.0138889	0	0.00694444	0.319444	0.586207	0.452826	0	0	0			-2.15882	NA	-1.89274	-2.02578
chr1q22	RHBG	0	0	0	0.0138889	0	0.00694444	0.319444	0.586207	0.452826	0	0	0			-2.83829	0.208132	0.061246	0.061246
chr1q22	C1orf61	0	0	0	0.0138889	0	0.00694444	0.319444	0.586207	0.452826	0	0	0			0.200885	4.8789	3.32092	3.32092
chr1q22	MEF2D	0	0	0	0.00925926	0.0266667	0.017963	0.240741	0.466667	0.353704	0	0.0266667	0.0133333		gain	1.45643	5.95394	2.78673	2.78673
chr1q22	IQGAP3	0	0	0	0.00990099	0.028169	0.019035	0.217822	0.43662	0.327221	0	0.028169	0.0140845		gain	4.40401	1.29512	0.218077	1.29512
chr1q23	TTC24	0	0	0	0.00925926	0.0266667	0.017963	0.240741	0.453333	0.347037	0	0.04	0.02		gain	NA	-2.28368	-1.1896	-1.73664
chr1q23	GPATCH4	0	0	0	0.00925926	0.0266667	0.017963	0.240741	0.453333	0.347037	0	0.04	0.02		gain	-2.7188	-3.53664	-1.9365	-2.7188
chr1q23	HAPLN2	0	0	0	0.00925926	0.0266667	0.017963	0.240741	0.453333	0.347037	0	0.04	0.02		gain	1.84806	8.41121	5.93667	5.93667
chr1q23	BCAN	0	0	0	0.00917431	0.0263158	0.0177451	0.229358	0.460526	0.344942	0	0.0394737	0.0197368		gain	-1.39339	3.16216	3.56398	3.16216
chr1q23	NES	0	0	0	0.00917431	0.0131579	0.0111661	0.229358	0.447368	0.338363	0	0.0526316	0.0263158		gain	-1.21211	0.200183	1.8257	0.200183
chr1q23	CRABP2	0	0	0	0.00917431	0.0131579	0.0111661	0.229358	0.460526	0.344942	0	0.0394737	0.0197368		gain	-9.17539	-2.82107	-3.8915	-3.8915
chr1q23	ISG20L2	0	0	0	0.00917431	0.0131579	0.0111661	0.229358	0.473684	0.351521	0	0.0394737	0.0197368		gain	-2.91463	-0.249931	-2.99201	-2.91463
chr1q23	RRNAD1	0	0	0	0.0138889	0	0.00694444	0.319444	0.551724	0.435584	0	0.0344828	0.0172414			1.28693	NA	1.44037	1.36365
chr1q23	MRPL24	0	0	0	0.00917431	0.0131579	0.0111661	0.229358	0.473684	0.351521	0	0.0394737	0.0197368		gain	1.1749	-0.437598	1.95533	1.1749
chr1q23	HDGF	0	0	0	0.00917431	0	0.00458716	0.229358	0.473684	0.351521	0	0.0394737	0.0197368		gain	-4.60023	-4.07794	-4.00167	-4.07794
chr1q23	PRCC	0	0	0	0.00917431	0	0.00458716	0.229358	0.473684	0.351521	0	0.0394737	0.0197368		gain	-2.28219	-2.98388	-5.2574	-2.98388
chr1q23	SH2D2A	0	0	0	0.00917431	0	0.00458716	0.229358	0.460526	0.344942	0	0.0394737	0.0197368		gain	-0.675764	-3.43871	-3.19946	-3.19946
chr1q23	NTRK1	0	0	0	0.0138889	0	0.00694444	0.319444	0.551724	0.435584	0	0.0344828	0.0172414			-2.5837	-4.67702	-4.04278	-4.04278
chr1q23	INSRR	0	0	0	0.0138889	0	0.00694444	0.319444	0.551724	0.435584	0	0.0344828	0.0172414			-2.02112	-1.52086	-3.69052	-2.02112
chr1q23	PEAR1	0	0	0	0.0138889	0	0.00694444	0.319444	0.551724	0.435584	0	0.0344828	0.0172414			-3.16441	-1.27758	-4.58472	-3.16441
chr1q23	LRRC71	0	0	0	0.0138889	0	0.00694444	0.319444	0.535714	0.427579	0	0.0357143	0.0178571			0.223456	NA	-1.52286	-0.649703
chr1q23	ARHGEF11	0	0	0	0.0144928	0	0.00724638	0.289855	0.5	0.394928	0	0.0357143	0.0178571			-4.74381	0.477817	-3.52733	-3.52733
chr1q23	ETV3L	0	0	0	0.0140845	0	0.00704225	0.295775	0.482759	0.389267	0	0.0344828	0.0172414			NA	-1.35266	-1.37217	-1.36241
chr1q23	ETV3	0	0	0	0.0140845	0.0344828	0.0242836	0.28169	0.448276	0.364983	0	0.0344828	0.0172414			-7.8943	0.683037	-4.12049	-4.12049
chr1q23	FCRL5	0	0	0	0.00961538	0.0133333	0.0114744	0.192308	0.44	0.316154	0	0.0133333	0.00666666		gain	-2.3591	-0.620058	-0.415885	-0.620058
chr1q23	FCRL4	0	0	0	0.00961538	0.0133333	0.0114744	0.192308	0.44	0.316154	0	0.0133333	0.00666666		gain	-1.14492	-1.96228	-1.3172	-1.3172
chr1q23	FCRL3	0	0	0	0.00925926	0.0131579	0.0112086	0.194444	0.447368	0.320906	0	0.0131579	0.00657895		gain	0.482005	-0.816168	-0.253981	-0.253981
chr1q23	FCRL2	0	0	0	0.00925926	0.0133333	0.0112963	0.203704	0.453333	0.328519	0	0.0133333	0.00666666		gain	-0.895772	-1.08222	-0.450781	-0.895772
chr1q23	FCRL1	0	0	0	0.00925926	0.0133333	0.0112963	0.203704	0.453333	0.328519	0	0.0133333	0.00666666		gain	-2.16187	-1.27884	-0.482522	-1.27884
chr1q23	CD5L	0	0	0	0.0138889	0.0344828	0.0241858	0.25	0.448276	0.349138	0	0	0			0.640022	0.890598	1.36545	0.890598
chr1q23	CD1D	0	0	0	0.0138889	0.0357143	0.0248016	0.25	0.428571	0.339286	0	0	0			-1.44863	-0.215662	-0.302548	-0.302548
chr1q23	CD1A	0	0	0	0.0183486	0.0131579	0.0157533	0.201835	0.421053	0.311444	0	0.0131579	0.00657895		gain	-1.46781	-0.170439	0.495598	-0.170439
chr1q23	CD1C	0	0	0	0.0183486	0.0131579	0.0157533	0.201835	0.421053	0.311444	0	0.0131579	0.00657895		gain	0.457202	2.31552	0.921802	0.921802
chr1q23	CD1B	0	0	0	0.0183486	0.0131579	0.0157533	0.201835	0.421053	0.311444	0	0.0131579	0.00657895		gain	-1.74597	1.17427	-0.843143	-0.843143
chr1q23	CD1E	0	0	0	0.0183486	0.0131579	0.0157533	0.201835	0.421053	0.311444	0	0.0131579	0.00657895		gain	1.57242	1.38882	0.302397	1.38882
chr1q23	OR10T2	0	0	0	0.0183486	0.0131579	0.0157533	0.201835	0.407895	0.304865	0	0.0131579	0.00657895		gain	NA	-1	0.664233	-0.167883
chr1q23	OR10K2	0	0	0	0.0138889	0.0344828	0.0241858	0.25	0.413793	0.331897	0	0	0			NA	-1	-0.527331	-0.763665
chr1q23	OR10K1	0	0	0	0.0138889	0.0344828	0.0241858	0.25	0.413793	0.331897	0	0	0			NA	NA	1.4115	1.4115
chr1q23	OR10R2	0	0	0	0.0138889	0.0344828	0.0241858	0.25	0.413793	0.331897	0	0	0			NA	-0.788181	-0.741773	-0.764977
chr1q23	OR6Y1	0	0	0	0.0138889	0.0344828	0.0241858	0.25	0.413793	0.331897	0	0	0			NA	-0.305242	-1.27407	-0.789655
chr1q23	OR6P1	0	0	0	0.0138889	0.0344828	0.0241858	0.25	0.413793	0.331897	0	0	0			NA	-1.42239	NA	-1.42239
chr1q23	OR10X1	0	0	0	0.0138889	0.0344828	0.0241858	0.25	0.413793	0.331897	0	0	0			NA	NA	-1	-1
chr1q23	OR10Z1	0	0	0	0.0138889	0.0344828	0.0241858	0.25	0.413793	0.331897	0	0	0			NA	NA	-1.46863	-1.46863
chr1q23	SPTA1	0	0	0	0.0138889	0.0344828	0.0241858	0.25	0.413793	0.331897	0	0	0			-1.6073	-1.43682	-2.12965	-1.6073
chr1q23	OR6K2	0	0	0	0.0138889	0.0344828	0.0241858	0.25	0.413793	0.331897	0	0	0			NA	-1	-1.50839	-1.2542
chr1q23	OR6K3	0	0	0	0.0138889	0.0344828	0.0241858	0.25	0.413793	0.331897	0	0	0			NA	1.27953	-0.252403	0.513566
chr1q23	OR6K6	0	0	0	0.0138889	0.0344828	0.0241858	0.25	0.413793	0.331897	0	0	0			NA	-1	-1.31045	-1.15523
chr1q23	OR6N1	0	0	0	0.0138889	0.0344828	0.0241858	0.25	0.413793	0.331897	0	0	0			NA	NA	-1.35734	-1.35734
chr1q23	OR6N2	0	0	0	0.0138889	0.0344828	0.0241858	0.25	0.413793	0.331897	0	0	0			NA	-0.824583	-1.56459	-1.19458
chr1q23	MNDA	0	0	0	0.0138889	0.0344828	0.0241858	0.25	0.413793	0.331897	0	0	0			0.818808	-0.374243	0.291491	0.291491
chr1q23	PYHIN1	0	0	0	0.0140845	0.0344828	0.0242836	0.253521	0.413793	0.333657	0	0	0			-0.158084	-0.672106	-1.25165	-0.672106
chr1q23	IFI16	0	0	0	0.0138889	0.0344828	0.0241858	0.25	0.448276	0.349138	0	0	0			-2.19918	-3.98407	-6.46465	-3.98407
chr1q23	AIM2	0	0	0	0.0138889	0.0344828	0.0241858	0.25	0.448276	0.349138	0	0	0			-6.53313	-5.70477	-4.29236	-5.70477
chr1q23	CADM3	0	0	0	0.00925926	0.0131579	0.0112086	0.203704	0.434211	0.318957	0	0.0263158	0.0131579		gain	0.893203	0.251496	-0.23581	0.251496
chr1q23	FCER1A	0	0	0	0.00925926	0.0131579	0.0112086	0.185185	0.421053	0.303119	0	0.0263158	0.0131579		gain	0.058232	3.48087	2.56056	2.56056
chr1q23	OR10J3	0	0	0	0.00925926	0.0131579	0.0112086	0.185185	0.421053	0.303119	0	0.0263158	0.0131579		gain	NA	-1.49946	-1.42758	-1.46352
chr1q23	OR10J1	0	0	0	0.0138889	0.0344828	0.0241858	0.25	0.448276	0.349138	0	0	0			-1.23067	2.32325	-1.21242	-1.21242
chr1q23	OR10J5	0	0	0	0.0138889	0.0344828	0.0241858	0.25	0.448276	0.349138	0	0	0			NA	-1	-0.871967	-0.935984
chr1q23	APCS	0	0	0	0.0138889	0.0344828	0.0241858	0.25	0.448276	0.349138	0	0	0			-1.21254	0.360431	0.0678557	0.0678557
chr1q23	CRP	0	0	0	0.0138889	0.0344828	0.0241858	0.25	0.448276	0.349138	0	0	0			-1.7284	0.407457	-1.83047	-1.7284
chr1q23	DUSP23	0	0	0	0.0138889	0.0344828	0.0241858	0.305556	0.482759	0.394157	0	0	0			-5.54591	-3.56873	-6.36264	-5.54591
chr1q23	FCRL6	0	0	0	0.0140845	0.0344828	0.0242836	0.309859	0.482759	0.396309	0	0	0			NA	-1.77538	-1.98998	-1.88268
chr1q23	SLAMF8	0	0	0	0.0138889	0.0344828	0.0241858	0.319444	0.482759	0.401102	0	0	0			-2.34942	-2.77016	-3.69526	-2.77016
chr1q23	VSIG8	0	0	0	0.0138889	0.0344828	0.0241858	0.319444	0.482759	0.401102	0	0	0			NA	-1.73411	-0.424553	-1.07933
chr1q23	TAGLN2	0	0	0	0.0138889	0.0344828	0.0241858	0.319444	0.482759	0.401102	0	0	0			-5.47788	-4.29239	-7.57133	-5.47788
chr1q23	IGSF9	0	0	0	0.0138889	0.0344828	0.0241858	0.319444	0.482759	0.401102	0	0	0			-2.19009	-1.83554	-1.26389	-1.83554
chr1q23	SLAMF9	0	0	0	0.0138889	0.0344828	0.0241858	0.319444	0.482759	0.401102	0	0	0			-1.79421	-3.50813	-0.559699	-1.79421
chr1q23	PIGM	0	0	0	0.0138889	0.0344828	0.0241858	0.305556	0.482759	0.394157	0	0	0			1.50352	0.575371	0.281092	0.575371
chr1q23	KCNJ10	0	0	0	0.00925926	0.0131579	0.0112086	0.268519	0.434211	0.351365	0	0.0394737	0.0197368			0.218687	-1.53994	-1.13399	-1.13399
chr1q23	KCNJ9	0	0	0	0.00925926	0.0131579	0.0112086	0.268519	0.434211	0.351365	0	0.0394737	0.0197368			0.479191	-0.914726	-1.16264	-0.914726
chr1q23	IGSF8	0	0	0	0.00925926	0.0131579	0.0112086	0.25	0.434211	0.342105	0	0.0394737	0.0197368		gain	-1.88946	-3.45728	0.15916	-1.88946
chr1q23	ATP1A2	0	0	0	0.00925926	0.0131579	0.0112086	0.240741	0.421053	0.330897	0	0.0394737	0.0197368		gain	-1.28011	1.53413	3.91251	1.53413
chr1q23	ATP1A4	0	0	0	0.00925926	0.0131579	0.0112086	0.240741	0.407895	0.324318	0	0.0394737	0.0197368			-0.875529	2.95579	0.464293	0.464293
chr1q23	CASQ1	0	0	0	0.00925926	0.0131579	0.0112086	0.231481	0.407895	0.319688	0	0.0394737	0.0197368		gain	0.681584	3.56472	5.2635	3.56472
chr1q23	PEA15	0	0	0	0.00925926	0.0131579	0.0112086	0.222222	0.407895	0.315058	0	0.0394737	0.0197368		gain	2.27966	2.9422	3.3977	2.9422
chr1q23	DCAF8	0	0	0	0.00925926	0.0131579	0.0112086	0.222222	0.407895	0.315058	0	0.0394737	0.0197368		gain	-1.38941	5.11634	2.68275	2.68275
chr1q23	PEX19	0	0	0	0.0138889	0.0344828	0.0241858	0.305556	0.482759	0.394157	0	0	0			0.670509	2.87988	2.50174	2.50174
chr1q23	COPA	0	0	0	0.0138889	0.0344828	0.0241858	0.305556	0.482759	0.394157	0	0	0			-5.6	-1.82305	-5.50494	-5.50494
chr1q23	NCSTN	0	0	0	0.0138889	0.0344828	0.0241858	0.305556	0.482759	0.394157	0	0	0			-6.05297	-1.45858	-3.23854	-3.23854
chr1q23	NHLH1	0	0	0	0.0138889	0.0344828	0.0241858	0.305556	0.482759	0.394157	0	0	0			-3.3072	-1.36464	-2.02943	-2.02943
chr1q23	VANGL2	0	0	0	0.0138889	0.0344828	0.0241858	0.305556	0.482759	0.394157	0	0	0			-0.831043	-1.26254	-1.43335	-1.26254
chr1q23	SLAMF6	0	0	0	0.0138889	0.0344828	0.0241858	0.305556	0.482759	0.394157	0	0	0			0.929917	-1.88351	-1.63408	-1.63408
chr1q23	CD84	0	0	0	0.00917431	0.0133333	0.0112538	0.220183	0.426667	0.323425	0	0.0266667	0.0133333		gain	-3.87503	-4.42077	-5.96007	-4.42077
chr1q23	SLAMF1	0	0	0	0.00917431	0.0131579	0.0111661	0.220183	0.421053	0.320618	0	0.0263158	0.0131579		gain	0.477437	0.102979	-0.847552	0.102979
chr1q23	CD48	0	0	0	0.00917431	0.0131579	0.0111661	0.238532	0.421053	0.329792	0	0.0394737	0.0197368		gain	0.338608	-1.08316	-0.601268	-0.601268
chr1q23	SLAMF7	0	0	0	0.00917431	0.0131579	0.0111661	0.220183	0.421053	0.320618	0	0.0263158	0.0131579		gain	0.0233775	-1.56525	-0.579042	-0.579042
chr1q23	LY9	0	0	0	0.00917431	0.0131579	0.0111661	0.220183	0.421053	0.320618	0	0.0263158	0.0131579		gain	-0.380534	-0.301908	-0.718739	-0.380534
chr1q23	CD244	0	0	0	0.0138889	0.0344828	0.0241858	0.319444	0.482759	0.401102	0	0	0			1.70534	1.27617	0.371381	1.27617
chr1q23	ITLN1	0	0	0	0.0138889	0.0344828	0.0241858	0.319444	0.482759	0.401102	0	0	0			1.43412	3.63808	0.891774	1.43412
chr1q23	ITLN2	0	0	0	0.0138889	0.0344828	0.0241858	0.319444	0.482759	0.401102	0	0	0			NA	4.57066	-0.120987	2.22484
chr1q23	F11R	0	0	0	0.0138889	0.0344828	0.0241858	0.319444	0.482759	0.401102	0	0	0			0.224251	-0.582134	-2.05529	-0.582134
chr1q23	TSTD1	0	0	0	0.0138889	0.0344828	0.0241858	0.319444	0.482759	0.401102	0	0	0			6.09672	0.733409	2.11914	2.11914
chr1q23	USF1	0	0	0	0.0138889	0.0344828	0.0241858	0.319444	0.482759	0.401102	0	0	0			0.0865696	-1.30263	-1.37263	-1.30263
chr1q23	ARHGAP30	0	0	0	0.0138889	0.0344828	0.0241858	0.319444	0.482759	0.401102	0	0	0			-1.50418	-3.10073	-2.76443	-2.76443
chr1q23	KLHDC9	0	0	0	0.0138889	0.0344828	0.0241858	0.319444	0.482759	0.401102	0	0	0			2.2928	5.32759	4.70756	4.70756
chr1q23	PFDN2	0	0	0	0.0138889	0.0344828	0.0241858	0.319444	0.482759	0.401102	0	0	0			-1.0852	-2.24287	-0.424148	-1.0852
chr1q23	NIT1	0	0	0	0.0138889	0.0344828	0.0241858	0.319444	0.482759	0.401102	0	0	0			1.31235	7.08327	2.99524	2.99524
chr1q23	DEDD	0	0	0	0.0138889	0.0344828	0.0241858	0.319444	0.482759	0.401102	0	0	0			-1.80902	1.98873	0.59777	0.59777
chr1q23	UFC1	0	0	0	0.00917431	0.0131579	0.0111661	0.229358	0.421053	0.325205	0	0.0263158	0.0131579		gain	-6.42007	-3.29085	-1.9194	-3.29085
chr1q23	USP21	0	0	0	0.00917431	0.0131579	0.0111661	0.229358	0.421053	0.325205	0	0.0263158	0.0131579		gain	0.0160758	2.79651	0.181874	0.181874
chr1q23	PPOX	0	0	0	0.0138889	0.0344828	0.0241858	0.319444	0.482759	0.401102	0	0	0			-0.513229	1.84163	1.238	1.238
chr1q23	B4GALT3	0	0	0	0.00917431	0.0131579	0.0111661	0.229358	0.421053	0.325205	0	0.0263158	0.0131579		gain	-8.26737	-8.4479	-8.56412	-8.4479
chr1q23	ADAMTS4	0	0	0	0.0183486	0.0263158	0.0223322	0.229358	0.407895	0.318626	0	0.0263158	0.0131579		gain	-0.841067	-2.43799	-2.89943	-2.43799
chr1q23	NDUFS2	0	0	0	0.0183486	0.0263158	0.0223322	0.229358	0.407895	0.318626	0	0.0263158	0.0131579		gain	-0.0811549	-0.544508	1.24314	-0.0811549
chr1q23	FCER1G	0	0	0	0.0183486	0.0263158	0.0223322	0.229358	0.407895	0.318626	0	0.0263158	0.0131579		gain	-2.27103	-4.78763	-4.42401	-4.42401
chr1q23	APOA2	0	0	0	0.00917431	0.0263158	0.0177451	0.229358	0.407895	0.318626	0	0.0263158	0.0131579		gain	-1.15267	-0.568689	-2.44827	-1.15267
chr1q23	TOMM40L	0	0	0	0.0138889	0.0689655	0.0414272	0.319444	0.448276	0.38386	0	0	0			-0.241383	0.499215	0.451212	0.451212
chr1q23	NR1I3	0	0	0	0.00917431	0.0263158	0.0177451	0.229358	0.407895	0.318626	0	0.0263158	0.0131579		gain	-1.00631	-0.415125	3.03254	-0.415125
chr1q23	PCP4L1	0	0	0	0.00917431	0.0263158	0.0177451	0.229358	0.407895	0.318626	0	0.0263158	0.0131579		gain	2.21778	4.16337	1.67598	2.21778
chr1q23	MPZ	0	0	0	0.0138889	0.0689655	0.0414272	0.319444	0.448276	0.38386	0	0	0			0.689743	-0.44314	-0.293462	-0.293462
chr1q23	SDHC	0	0	0	0.0138889	0.0689655	0.0414272	0.319444	0.448276	0.38386	0	0	0			-5.04744	-1.85458	0.0580516	-1.85458
chr1q23	FCGR2A	0	0	0	0.0138889	0.0689655	0.0414272	0.333333	0.413793	0.373563	0	0.0344828	0.0172414			-1.97803	-4.13672	-4.61346	-4.13672
chr1q23	HSPA6	0	0	0	0.0138889	0.0689655	0.0414272	0.333333	0.413793	0.373563	0	0.0344828	0.0172414			-3.62259	-3.0299	-1.9643	-3.0299
chr1q23	FCGR3A	0	0	0	0.0138889	0.0689655	0.0414272	0.333333	0.413793	0.373563	0	0.0344828	0.0172414			-1.35576	-4.63751	-3.53767	-3.53767
chr1q23	FCGR2C	0	0	0	0.0138889	0.0714286	0.0426587	0.333333	0.428571	0.380952	0	0	0			-2.72777	-4.02459	-2.93701	-2.93701
chr1q23	FCGR3B	0	0	0	0.0140845	0.0714286	0.0427565	0.352113	0.428571	0.390342	0	0	0			-1.98799	-2.02119	-1.53598	-1.98799
chr1q23	FCGR2B	0	0	0	0.0138889	0.0714286	0.0426587	0.277778	0.392857	0.335317	0	0	0			-2.9202	-3.65905	-3.80032	-3.65905
chr1q23	FCRLA	0	0	0	0.0138889	0.0689655	0.0414272	0.277778	0.413793	0.345785	0	0	0			2.87386	4.9904	4.57541	4.57541
chr1q23	FCRLB	0	0	0	0.0138889	0.0689655	0.0414272	0.277778	0.413793	0.345785	0	0	0			-2.10707	-1.15248	-1.55294	-1.55294
chr1q23	DUSP12	0	0	0	0.0138889	0.0689655	0.0414272	0.277778	0.413793	0.345785	0	0	0			-3.56087	-2.04182	-2.65233	-2.65233
chr1q23	ATF6	0	0	0	0.0140845	0.0689655	0.041525	0.28169	0.413793	0.347742	0	0	0			0.976557	5.21729	2.48207	2.48207
chr1q23	OLFML2B	0	0	0	0.0138889	0.0689655	0.0414272	0.291667	0.413793	0.35273	0	0	0			-6.02034	-5.99088	-6.1335	-6.02034
chr1q23	NOS1AP	0	0	0	0.0138889	0.0689655	0.0414272	0.277778	0.413793	0.345785	0	0	0			3.70714	7.78921	4.52372	4.52372
chr1q23	C1orf226	0	0	0	0.0138889	0.0689655	0.0414272	0.277778	0.413793	0.345785	0	0	0			7.59275	7.83845	5.20934	7.59275
chr1q23	SH2D1B	0	0	0	0.0138889	0.0689655	0.0414272	0.277778	0.413793	0.345785	0	0	0			0.692279	-0.922945	-1.89514	-0.922945
chr1q23	UHMK1	0	0	0	0.00917431	0.0266667	0.0179205	0.211009	0.426667	0.318838	0	0.0133333	0.00666666		gain	-4.23587	0.665524	-1.52416	-1.52416
chr1q23	UAP1	0	0	0	0.00917431	0.0266667	0.0179205	0.201835	0.426667	0.314251	0	0.0266667	0.0133333		gain	-4.57976	-2.22929	-2.12428	-2.22929
chr1q23	DDR2	0	0	0	0.0275229	0.0526316	0.0400773	0.211009	0.407895	0.309452	0	0.0263158	0.0131579		gain	0.480876	2.51216	1.283	1.283
chr1q23	HSD17B7	0	0	0	0.0654206	0.0666667	0.0660436	0.224299	0.426667	0.325483	0.00934579	0.04	0.0246729		gain	-0.5875	-2.15889	-1.13885	-1.13885
chr1q23	RGS4	0	0	0	0.00917431	0.0657895	0.0374819	0.211009	0.368421	0.289715	0	0.0263158	0.0131579			-1.64955	-2.0054	-2.21615	-2.0054
chr1q23	RGS5	0	0	0	0.00917431	0.0789474	0.0440608	0.211009	0.381579	0.296294	0	0.0131579	0.00657895		gain	3.54006	2.21963	0.0561	2.21963
chr1q23	NUF2	0	0	0	0.0138889	0.103448	0.0586686	0.277778	0.37931	0.328544	0	0	0			1.83085	-2.01668	-0.996738	-0.996738
chr1q23	PBX1	0	0	0	0.00970874	0.0810811	0.0453949	0.223301	0.378378	0.30084	0	0.027027	0.0135135			7.70478	7.40539	6.40133	7.40539
chr1q23	LMX1A	0	0	0	0.00934579	0.0540541	0.0316999	0.205607	0.378378	0.291993	0	0.027027	0.0135135		gain	-1.0805	0.0902994	-2.19275	-1.0805
chr1q23	RXRG	0	0	0	0.00925926	0.0533333	0.0312963	0.212963	0.373333	0.293148	0	0.0266667	0.0133333			-1.38443	2.83667	-0.120807	-0.120807
chr1q24	LRRC52	0	0	0	0.00917431	0.0666667	0.0379205	0.220183	0.373333	0.296758	0	0.0266667	0.0133333			-0.0617066	-0.280505	-1.30643	-0.280505
chr1q24	MGST3	0	0	0	0.0138889	0.0689655	0.0414272	0.277778	0.413793	0.345785	0	0	0			-0.121322	3.12281	2.93548	2.93548
chr1q24	ALDH9A1	0	0	0	0.0138889	0.0689655	0.0414272	0.277778	0.413793	0.345785	0	0	0			-3.55323	0.331878	-0.729891	-0.729891
chr1q24	TMCO1	0	0	0	0.0138889	0.0689655	0.0414272	0.277778	0.413793	0.345785	0	0	0			-2.90843	-2.84016	-2.88687	-2.88687
chr1q24	UCK2	0	0	0	0.0138889	0.0689655	0.0414272	0.277778	0.413793	0.345785	0	0	0			NA	-3.77255	-2.55527	-3.16391
chr1q24	FAM78B	0	0	0	0.00925926	0.0666667	0.037963	0.212963	0.373333	0.293148	0	0.0266667	0.0133333			0.399535	-0.950071	1.21936	0.399535
chr1q24	POGK	0	0	0	0.0138889	0.0689655	0.0414272	0.277778	0.448276	0.363027	0	0	0			0.427221	3.74461	-0.224512	0.427221
chr1q24	TADA1	0	0	0	0.0138889	0.0689655	0.0414272	0.277778	0.448276	0.363027	0	0	0			2.24091	4.35129	1.4412	2.24091
chr1q24	ILDR2	0	0	0	0.0138889	0.0689655	0.0414272	0.277778	0.448276	0.363027	0	0	0			-0.562796	4.11331	0.314805	0.314805
chr1q24	MAEL	0	0	0	0.0185185	0.0416667	0.0300926	0.203704	0.375	0.289352	0	0.0277778	0.0138889		gain	-2.35128	1.50426	-0.575226	-0.575226
chr1q24	GPA33	0	0	0	0.0185185	0.0416667	0.0300926	0.203704	0.375	0.289352	0	0.0277778	0.0138889		gain	-1.00002	-1.84814	0.219463	-1.00002
chr1q24	DUSP27	0	0	0	0.0185185	0.0416667	0.0300926	0.203704	0.361111	0.282407	0	0.0277778	0.0138889			1.13774	0.398891	2.2469	1.13774
chr1q24	POU2F1	0	0	0	0.00925926	0.0547945	0.0320269	0.212963	0.39726	0.305112	0	0.0273973	0.0136986		gain	4.57098	1.16884	3.05019	3.05019
chr1q24	CD247	0	0	0	0.00917431	0.0533333	0.0312538	0.229358	0.386667	0.308012	0	0.04	0.02			0.183474	-0.766137	-0.600402	-0.600402
chr1q24	CREG1	0	0	0	0.00917431	0.0533333	0.0312538	0.211009	0.36	0.285505	0	0.04	0.02			0.113709	1.49705	0.294191	0.294191
chr1q24	RCSD1	0	0	0	0.0275229	0.0533333	0.0404281	0.211009	0.36	0.285505	0	0.04	0.02			0.285547	-0.0469523	0.503123	0.285547
chr1q24	MPZL1	0	0	0	0.0140845	0.0689655	0.041525	0.28169	0.448276	0.364983	0	0	0			-6.93793	-4.34506	-6.2668	-6.2668
chr1q24	ADCY10	0	0	0	0.0183486	0.0533333	0.035841	0.211009	0.346667	0.278838	0	0.04	0.02			-0.880207	1.56802	-1.30862	-0.880207
chr1q24	MPC2	0	0	0	0.0138889	0.0689655	0.0414272	0.277778	0.37931	0.328544	0	0.0344828	0.0172414			2.12342	NA	3.04001	2.58172
chr1q24	DCAF6	0	0	0	0.0183486	0.0533333	0.035841	0.201835	0.346667	0.274251	0	0.04	0.02			-0.643836	1.87074	2.53533	1.87074
chr1q24	GPR161	0	0	0	0.0138889	0.0689655	0.0414272	0.277778	0.448276	0.363027	0	0	0			5.62339	5.33428	4.24992	5.33428
chr1q24	TIPRL	0	0	0	0.0138889	0.0689655	0.0414272	0.277778	0.448276	0.363027	0	0	0			3.03706	2.45013	3.22174	3.03706
chr1q24	SFT2D2	0	0	0	0.00943396	0.0810811	0.0452575	0.207547	0.351351	0.279449	0	0.027027	0.0135135			-2.91437	-1.12126	-2.4921	-2.4921
chr1q24	TBX19	0	0	0	0.00943396	0.0810811	0.0452575	0.216981	0.364865	0.290923	0	0.027027	0.0135135			-1.61329	0.148643	-1.6147	-1.61329
chr1q24	XCL2	0	0	0	0.0138889	0.0689655	0.0414272	0.277778	0.448276	0.363027	0	0	0			NA	-0.838942	-0.43413	-0.636536
chr1q24	XCL1	0	0	0	0.0138889	0.0689655	0.0414272	0.277778	0.448276	0.363027	0	0	0			0.211069	-0.672126	-0.513703	-0.513703
chr1q24	DPT	0	0	0	0.0138889	0.0344828	0.0241858	0.277778	0.482759	0.380268	0	0	0			-8.60731	-2.2454	-6.22143	-6.22143
chr1q24	ATP1B1	0	0	0	0.0140845	0.0344828	0.0242836	0.28169	0.482759	0.382224	0	0	0			1.85029	0.131868	1.7143	1.7143
chr1q24	NME7	0	0	0	0.0144928	0.0384615	0.0264771	0.275362	0.461538	0.36845	0	0	0			1.13862	-2.51866	-1.83832	-1.83832
chr1q24	BLZF1	0	0	0	0.0138889	0.0344828	0.0241858	0.277778	0.482759	0.380268	0	0	0			-0.0830713	1.80924	-0.616891	-0.0830713
chr1q24	CCDC181	0	0	0	0.0138889	0.0344828	0.0241858	0.277778	0.482759	0.380268	0	0	0			-1.86805	NA	-0.70816	-1.28811
chr1q24	SLC19A2	0	0	0	0.0138889	0.0344828	0.0241858	0.277778	0.448276	0.363027	0	0.0344828	0.0172414			-0.245384	-0.680738	0.355891	-0.245384
chr1q24	F5	0	0	0	0.0138889	0.0344828	0.0241858	0.277778	0.448276	0.363027	0	0.0344828	0.0172414			-2.28375	-1.72333	-0.173802	-1.72333
chr1q24	SELP	0	0	0	0.0138889	0.0344828	0.0241858	0.277778	0.448276	0.363027	0	0.0344828	0.0172414			-0.743524	2.06974	0.491736	0.491736
chr1q24	C1orf112	0	0	0	0.0138889	0.0357143	0.0248016	0.277778	0.5	0.388889	0	0	0			-2.64747	-1.34811	-1.0793	-1.34811
chr1q24	SELL	0	0	0	0.0183486	0.0657895	0.042069	0.201835	0.368421	0.285128	0	0.0394737	0.0197368		gain	-0.561364	-0.925292	-1.17026	-0.925292
chr1q24	SELE	0	0	0	0.0183486	0.0657895	0.042069	0.201835	0.355263	0.278549	0	0.0394737	0.0197368			0.375996	-0.503988	-1.8366	-0.503988
chr1q24	METTL18	0	0	0	0.0138889	0.0344828	0.0241858	0.277778	0.482759	0.380268	0	0	0			0.536644	NA	0.687498	0.612071
chr1q24	SCYL3	0	0	0	0.0138889	0.0357143	0.0248016	0.277778	0.5	0.388889	0	0	0			-0.780405	1.84341	0.0522353	0.0522353
chr1q24	KIFAP3	0	0	0	0.0138889	0.0344828	0.0241858	0.277778	0.482759	0.380268	0	0	0			-7.49711	-5.46207	-3.42594	-5.46207
chr1q24	METTL11B	0	0	0	0.0138889	0.0344828	0.0241858	0.277778	0.448276	0.363027	0	0	0			NA	-2.82716	-2.04533	-2.43624
chr1q24	GORAB	0	0	0	0.0138889	0.0344828	0.0241858	0.277778	0.448276	0.363027	0	0	0			-1.75638	0.518938	-1.96871	-1.75638
chr1q24	PRRX1	0	0	0	0.0138889	0.0357143	0.0248016	0.277778	0.464286	0.371032	0	0	0			-2.35847	0.781576	-4.06381	-2.35847
chr1q24	MROH9	0	0	0	0.0138889	0.0357143	0.0248016	0.291667	0.464286	0.377976	0	0	0			-1.50547	NA	-2.34171	-1.92359
chr1q24	FMO3	0	0	0	0.0138889	0.037037	0.025463	0.291667	0.444444	0.368056	0	0	0			4.66218	1.7503	2.06499	2.06499
chr1q24	FMO2	0	0	0	0.0138889	0.0344828	0.0241858	0.291667	0.448276	0.369971	0	0	0			1.87031	3.34908	1.462	1.87031
chr1q24	FMO1	0	0	0	0.0277778	0.0540541	0.0409159	0.222222	0.337838	0.28003	0	0.0405405	0.0202703			-3.81937	-2.65314	-4.47779	-3.81937
chr1q24	FMO4	0	0	0	0.0185185	0.0540541	0.0362863	0.222222	0.337838	0.28003	0	0.027027	0.0135135			1.88587	8.82894	1.82338	1.88587
chr1q24	PRRC2C	0	0	0	0.0138889	0.0344828	0.0241858	0.291667	0.448276	0.369971	0	0	0			-4.4642	NA	-3.25949	-3.86185
chr1q24	MYOC	0	0	0	0.0183486	0.0657895	0.042069	0.238532	0.342105	0.290319	0	0.0394737	0.0197368			4.71927	7.55033	9.47573	7.55033
chr1q24	VAMP4	0	0	0	0.0183486	0.0526316	0.0354901	0.220183	0.355263	0.287723	0	0.0394737	0.0197368			-1.86749	1.74486	0.544611	0.544611
chr1q24	DNM3	0	0	0	0.0138889	0.0384615	0.0261752	0.291667	0.5	0.395833	0	0	0			-2.494	0.175672	-0.615789	-0.615789
chr1q24	PIGC	0	0	0	0.0138889	0.0344828	0.0241858	0.291667	0.448276	0.369971	0	0	0			NA	-0.0652805	-0.786379	-0.42583
chr1q24	C1orf105	0	0	0	0.0138889	0.0344828	0.0241858	0.291667	0.448276	0.369971	0	0	0			-0.336024	-1.42306	-1.06023	-1.06023
chr1q24	SUCO	0	0	0	0.0138889	0.0344828	0.0241858	0.291667	0.448276	0.369971	0	0	0			-3.69427	NA	-2.2374	-2.96583
chr1q24	FASLG	0	0	0	0.0192308	0.0428571	0.031044	0.221154	0.4	0.310577	0	0.0285714	0.0142857		gain	1.15737	-1.04002	-1.69409	-1.04002
chr1q25	TNFSF18	0	0	0	0.0185185	0.0547945	0.0366565	0.212963	0.383562	0.298262	0	0.0136986	0.00684931			0.471915	0.525981	1.74796	0.525981
chr1q25	TNFSF4	0	0	0	0.01	0.0597015	0.0348507	0.22	0.38806	0.30403	0	0.0149254	0.00746269			-3.36678	-1.65587	-2.77891	-2.77891
chr1q25	PRDX6	0	0	0	0.0138889	0.0689655	0.0414272	0.291667	0.413793	0.35273	0	0	0			3.57437	2.7236	4.41419	3.57437
chr1q25	SLC9C2	0	0	0	0.0138889	0.0689655	0.0414272	0.291667	0.413793	0.35273	0	0	0			-1.06622	NA	5.46413	2.19896
chr1q25	ANKRD45	0	0	0	0.0138889	0.0689655	0.0414272	0.291667	0.413793	0.35273	0	0	0			3.00081	4.07117	4.02438	4.02438
chr1q25	KLHL20	0	0	0	0.0138889	0.0689655	0.0414272	0.291667	0.413793	0.35273	0	0	0			1.78477	4.23161	3.3407	3.3407
chr1q25	CENPL	0	0	0	0.0138889	0.0689655	0.0414272	0.291667	0.413793	0.35273	0	0	0			0.644396	0.180679	0.434441	0.434441
chr1q25	DARS2	0	0	0	0.0138889	0.0689655	0.0414272	0.291667	0.413793	0.35273	0	0	0			-3.0572	-2.48242	-1.66683	-2.48242
chr1q25	ZBTB37	0	0	0	0.0138889	0.0689655	0.0414272	0.291667	0.413793	0.35273	0	0	0			-0.242569	2.52196	2.57739	2.52196
chr1q25	SERPINC1	0	0	0	0.0138889	0.0689655	0.0414272	0.291667	0.413793	0.35273	0	0	0			-0.176187	1.13189	-1.02448	-0.176187
chr1q25	RC3H1	0	0	0	0.0192308	0.08	0.0496154	0.211538	0.36	0.285769	0	0.0133333	0.00666666			0.280115	2.50325	NA	1.39168
chr1q25	RABGAP1L	0	0.0136986	0.00684931	0.0873786	0.109589	0.0984838	0.203883	0.342466	0.273175	0	0.0136986	0.00684931			-0.11473	3.98219	0.622346	0.622346
chr1q25	GPR52	0	0	0	0.0185185	0.0533333	0.0359259	0.203704	0.373333	0.288519	0	0.0133333	0.00666666		gain	1.37183	-0.481636	-1.06182	-0.481636
chr1q25	CACYBP	0	0	0	0.0366972	0.08	0.0583486	0.201835	0.333333	0.267584	0	0.0133333	0.00666666			-0.630939	-1.35477	-0.00334063	-0.630939
chr1q25	MRPS14	0	0	0	0.0366972	0.0789474	0.0578223	0.201835	0.342105	0.27197	0	0.0131579	0.00657895			-0.337811	-1.3253	1.7393	-0.337811
chr1q25	TNN	0	0	0	0.037037	0.0810811	0.0590591	0.222222	0.351351	0.286787	0	0.0135135	0.00675675			-3.05462	-4.79617	-4.48746	-4.48746
chr1q25	KIAA0040	0	0	0	0.037037	0.0933333	0.0651852	0.212963	0.333333	0.273148	0	0.0133333	0.00666666			2.01625	1.93186	0.0888751	1.93186
chr1q25	TNR	0	0	0	0.0458716	0.0789474	0.0624095	0.229358	0.328947	0.279153	0	0.0131579	0.00657895			-0.976911	0.462932	-0.228139	-0.228139
chr1q25	PAPPA2	0	0	0	0.0277778	0.0789474	0.0533626	0.212963	0.315789	0.264376	0	0.0263158	0.0131579			1.19905	1.03992	1.74186	1.19905
chr1q25	ASTN1	0	0	0	0.0277778	0.0714286	0.0496032	0.263889	0.321429	0.292659	0.0138889	0	0.00694444			1.91502	4.03447	4.32315	4.03447
chr1q25	SEC16B	0	0	0	0.0277778	0.0689655	0.0483716	0.263889	0.310345	0.287117	0.0138889	0	0.00694444			-6.38588	-0.832966	-3.52932	-3.52932
chr1q25	RASAL2	0	0	0	0.0422535	0.0384615	0.0403575	0.267606	0.230769	0.249187	0.0140845	0.0384615	0.026273			-3.84471	0.1546	-2.59241	-2.59241
chr1q25	TEX35	0	0	0	0.0416667	0.103448	0.0725575	0.305556	0.172414	0.238985	0.0138889	0.0344828	0.0241858			0.343752	NA	0.92977	0.636761
chr1q25	RALGPS2	0	0	0	0.0384615	0.123288	0.0808746	0.211538	0.246575	0.229057	0	0.0273973	0.0136986			-0.601137	-0.792426	0.106176	-0.601137
chr1q25	ANGPTL1	0	0	0	0.0416667	0.103448	0.0725575	0.263889	0.172414	0.218151	0.0138889	0.0344828	0.0241858			3.76524	2.61293	3.66261	3.66261
chr1q25	FAM20B	0	0	0	0.037037	0.123288	0.0801624	0.222222	0.246575	0.234399	0.00925926	0.0273973	0.0183283			2.90006	6.42726	5.39648	5.39648
chr1q25	TOR3A	0	0	0	0.0422535	0.103448	0.0728509	0.28169	0.172414	0.227052	0.0140845	0.0344828	0.0242836			-0.138579	0.195857	1.24335	0.195857
chr1q25	ABL2	0	0.0131579	0.00657895	0.0555556	0.118421	0.0869883	0.203704	0.25	0.226852	0.00925926	0.0263158	0.0177875			-6.52299	-5.03225	-5.01592	-5.03225
chr1q25	SOAT1	0	0	0	0.0458716	0.105263	0.0755674	0.192661	0.276316	0.234488	0.00917431	0.0131579	0.0111661			-6.5232	-5.76506	-4.03511	-5.76506
chr1q25	AXDND1	0	0	0	0.0555556	0.103448	0.0795019	0.263889	0.206897	0.235393	0.0138889	0	0.00694444			0.037199	NA	1.27492	0.656061
chr1q25	NPHS2	0	0	0	0.0416667	0.0714286	0.0565476	0.263889	0.214286	0.239087	0.0138889	0	0.00694444			-0.802058	-0.336154	1.32641	-0.336154
chr1q25	TDRD5	0	0	0	0.0416667	0.103448	0.0725575	0.263889	0.206897	0.235393	0.0138889	0	0.00694444			-1.26413	0.113499	0.758138	0.113499
chr1q25	FAM163A	0	0	0	0.0416667	0.0689655	0.0553161	0.305556	0.206897	0.256226	0.0138889	0	0.00694444			-0.544702	-1.51888	-0.0644773	-0.544702
chr1q25	TOR1AIP2	0	0	0	0.0416667	0.103448	0.0725575	0.263889	0.206897	0.235393	0.0138889	0	0.00694444			-2.82554	0.145784	-2.38217	-2.38217
chr1q25	TOR1AIP1	0	0	0	0.0416667	0.103448	0.0725575	0.263889	0.206897	0.235393	0.0138889	0	0.00694444			5.82628	5.72402	6.96459	5.82628
chr1q25	CEP350	0	0	0	0.0422535	0.103448	0.0728509	0.267606	0.206897	0.237251	0.0140845	0	0.00704225			0.956739	3.38812	2.10758	2.10758
chr1q25	QSOX1	0	0	0	0.0416667	0.0714286	0.0565476	0.305556	0.214286	0.259921	0.0138889	0	0.00694444			-4.00277	-2.81552	-1.05978	-2.81552
chr1q25	LHX4	0	0	0	0.0428571	0.0689655	0.0559113	0.285714	0.206897	0.246305	0.0142857	0	0.00714286			-1.45764	0.583791	-0.661664	-0.661664
chr1q25	ACBD6	0	0	0	0.0422535	0.103448	0.0728509	0.267606	0.206897	0.237251	0.0140845	0	0.00704225			-0.0833864	-1.53708	1.03672	-0.0833864
chr1q25	XPR1	0	0	0	0.0606061	0.123077	0.0918415	0.191919	0.230769	0.211344	0	0.0153846	0.00769231			-1.04415	-0.509981	1.30424	-0.509981
chr1q25	KIAA1614	0	0	0	0.0416667	0.0714286	0.0565476	0.291667	0.25	0.270833	0.0138889	0	0.00694444			0.0351698	4.69947	2.92395	2.92395
chr1q25	STX6	0	0	0	0.0416667	0.103448	0.0725575	0.291667	0.241379	0.266523	0.0138889	0	0.00694444			-4.06517	-3.34321	-1.08027	-3.34321
chr1q25	MR1	0	0	0	0.0416667	0.103448	0.0725575	0.291667	0.241379	0.266523	0.0138889	0	0.00694444			2.22054	2.32515	3.2898	2.32515
chr1q25	IER5	0	0	0	0.0416667	0.103448	0.0725575	0.291667	0.241379	0.266523	0.0138889	0	0.00694444			-2.97177	-2.0105	1.71058	-2.0105
chr1q25	CACNA1E	0	0	0	0.0416667	0.107143	0.0744048	0.277778	0.25	0.263889	0.0138889	0	0.00694444			-2.19459	0.24651	-1.08482	-1.08482
chr1q25	ZNF648	0	0	0	0.0416667	0.103448	0.0725575	0.277778	0.206897	0.242337	0.0138889	0	0.00694444			NA	-0.892648	-1.08194	-0.987293
chr1q25	GLUL	0	0	0	0.0458716	0.133333	0.0896024	0.201835	0.253333	0.227584	0.00917431	0.0133333	0.0112538			0.724404	2.90156	1.53012	1.53012
chr1q25	TEDDM1	0	0	0	0.0458716	0.133333	0.0896024	0.201835	0.253333	0.227584	0.00917431	0.0133333	0.0112538			0.560055	2.46978	3.5277	2.46978
chr1q25	RGSL1	0	0	0	0.0462963	0.133333	0.0898148	0.203704	0.253333	0.228519	0.00925926	0.0133333	0.0112963			-0.634889	-0.248137	0.494347	-0.248137
chr1q25	RNASEL	0	0	0	0.0416667	0.103448	0.0725575	0.277778	0.206897	0.242337	0.0138889	0	0.00694444			-1.58567	1.68629	1.86421	1.68629
chr1q25	RGS16	0	0	0	0.0416667	0.0689655	0.0553161	0.277778	0.241379	0.259579	0.0138889	0	0.00694444			-2.41186	-2.46158	-2.77359	-2.46158
chr1q25	RGS8	0	0	0	0.0416667	0.103448	0.0725575	0.277778	0.206897	0.242337	0.0138889	0	0.00694444			4.485	1.43385	0.33473	1.43385
chr1q25	NPL	0	0	0	0.0416667	0.103448	0.0725575	0.277778	0.206897	0.242337	0.0138889	0	0.00694444			-4.3418	-4.81256	-6.74407	-4.81256
chr1q25	DHX9	0	0	0	0.0416667	0.103448	0.0725575	0.277778	0.206897	0.242337	0.0138889	0	0.00694444			-1.60323	0.542574	0.54885	0.542574
chr1q25	SHCBP1L	0	0	0	0.0555556	0.103448	0.0795019	0.277778	0.206897	0.242337	0.0138889	0	0.00694444			-1.69789	NA	-1.54233	-1.62011
chr1q25	LAMC1	0	0	0	0.0555556	0.0714286	0.0634921	0.277778	0.214286	0.246032	0.0138889	0	0.00694444			3.79222	2.77392	1.23229	2.77392
chr1q25	LAMC2	0	0	0	0.0555556	0.0689655	0.0622605	0.277778	0.241379	0.259579	0.0138889	0	0.00694444			1.45274	2.29173	0.535498	1.45274
chr1q25	NMNAT2	0	0	0	0.0555556	0.0689655	0.0622605	0.277778	0.241379	0.259579	0.0138889	0	0.00694444			2.84984	6.1263	3.26826	3.26826
chr1q25	SMG7	0	0	0	0.0555556	0.0689655	0.0622605	0.277778	0.206897	0.242337	0.0138889	0	0.00694444			0.109834	0.618988	-0.970444	0.109834
chr1q25	NCF2	0	0	0	0.0555556	0.0689655	0.0622605	0.277778	0.206897	0.242337	0.0138889	0	0.00694444			-2.06875	-1.48533	-1.08304	-1.48533
chr1q25	ARPC5	0	0	0	0.0555556	0.0689655	0.0622605	0.277778	0.206897	0.242337	0.0138889	0	0.00694444			1.89411	0.0468027	3.41131	1.89411
chr1q25	RGL1	0	0	0	0.0555556	0.0689655	0.0622605	0.277778	0.206897	0.242337	0.0138889	0	0.00694444			-3.15355	-0.216939	-2.68025	-2.68025
chr1q25	APOBEC4	0	0	0	0.0555556	0.0689655	0.0622605	0.277778	0.206897	0.242337	0.0138889	0	0.00694444			0.764157	2.73632	2.99428	2.73632
chr1q25	COLGALT2	0	0	0	0.0416667	0.0689655	0.0553161	0.277778	0.206897	0.242337	0.0138889	0	0.00694444			-5.13514	NA	-1.67058	-3.40286
chr1q25	TSEN15	0	0	0	0.0416667	0.0689655	0.0553161	0.277778	0.206897	0.242337	0.0138889	0	0.00694444			0.551505	-0.581892	1.18415	0.551505
chr1q25	C1orf21	0	0	0	0.0416667	0.0689655	0.0553161	0.277778	0.206897	0.242337	0.0138889	0	0.00694444			4.72998	4.57898	3.97512	4.57898
chr1q25	EDEM3	0	0	0	0.0462963	0.131579	0.0889376	0.212963	0.236842	0.224903	0.00925926	0.0131579	0.0112086			-5.89747	-3.14444	-4.56696	-4.56696
chr1q25	RNF2	0	0	0	0.0416667	0.0689655	0.0553161	0.277778	0.241379	0.259579	0.0138889	0	0.00694444			-2.71402	-8.78558	-5.57292	-5.57292
chr1q25	TRMT1L	0	0	0	0.0416667	0.0689655	0.0553161	0.277778	0.241379	0.259579	0.0138889	0	0.00694444			0.297695	NA	3.52158	1.90964
chr1q25	SWT1	0	0	0	0.0416667	0.0714286	0.0565476	0.277778	0.214286	0.246032	0.0138889	0	0.00694444			-3.93056	NA	0.136458	-1.89705
chr1q25	IVNS1ABP	0	0	0	0.0458716	0.144737	0.0953042	0.201835	0.223684	0.21276	0.00917431	0.0131579	0.0111661			-5.90878	-6.12941	-4.74211	-5.90878
chr1q25	HMCN1	0	0	0	0.0648148	0.148649	0.106732	0.194444	0.22973	0.212087	0	0.0135135	0.00675675			-8.44017	-5.20108	-6.21145	-6.21145
chr1q31	PRG4	0	0	0	0.0648148	0.157895	0.111355	0.194444	0.236842	0.215643	0	0.0131579	0.00657895			-4.71703	-4.44027	-2.21932	-4.44027
chr1q31	TPR	0	0	0	0.0648148	0.16	0.112407	0.194444	0.226667	0.210556	0	0.0133333	0.00666666			0.403832	3.07925	3.11377	3.07925
chr1q31	OCLM	0	0	0	0.0555556	0.103448	0.0795019	0.236111	0.172414	0.204262	0	0	0			-1.5588	1.59975	-0.334619	-0.334619
chr1q31	PDC	0	0	0	0.0576923	0.16	0.108846	0.192308	0.213333	0.202821	0	0.0133333	0.00666666			-0.554485	0.762975	1.83028	0.762975
chr1q31	PTGS2	0	0	0	0.0576923	0.135135	0.0964137	0.192308	0.202703	0.197505	0	0.027027	0.0135135			3.4519	0.496776	0.956064	0.956064
chr1q31	PLA2G4A	0	0	0	0.0654206	0.15493	0.110175	0.196262	0.211268	0.203765	0	0.028169	0.0140845			-2.95338	-2.37314	-1.51547	-2.37314
chr1q31	RGS18	0	0	0	0.0555556	0.183099	0.119327	0.185185	0.197183	0.191184	0	0.0140845	0.00704225			-1.98899	-1.04641	-1.7309	-1.7309
chr1q31	RGS21	0	0	0	0.0555556	0.197183	0.126369	0.185185	0.197183	0.191184	0	0.0140845	0.00704225			NA	-0.626479	0.408423	-0.109028
chr1q31	RGS1	0	0	0	0.0555556	0.137931	0.0967433	0.236111	0.172414	0.204262	0	0	0			0.535538	-3.14367	-1.97462	-1.97462
chr1q31	RGS13	0	0	0	0.0555556	0.137931	0.0967433	0.236111	0.172414	0.204262	0	0	0			0.105397	2.18559	2.67202	2.18559
chr1q31	RGS2	0	0	0	0.0555556	0.137931	0.0967433	0.236111	0.172414	0.204262	0	0	0			7.3361	3.93177	4.41562	4.41562
chr1q31	UCHL5	0	0	0	0.0555556	0.137931	0.0967433	0.236111	0.172414	0.204262	0	0	0			0.594383	0.593227	2.14773	0.594383
chr1q31	GLRX2	0	0	0	0.0555556	0.137931	0.0967433	0.236111	0.172414	0.204262	0	0	0			-0.109888	-1.34828	0.783386	-0.109888
chr1q31	CDC73	0	0.0405405	0.0202703	0.147059	0.256757	0.201908	0.186275	0.175676	0.180975	0	0	0			4.74644	2.48305	7.56511	4.74644
chr1q31	B3GALT2	0	0	0	0.0588235	0.22973	0.144277	0.186275	0.189189	0.187732	0	0.0135135	0.00675675			0.700762	1.71377	3.36235	1.71377
chr1q31	KCNT2	0	0	0	0.0471698	0.22973	0.13845	0.207547	0.162162	0.184855	0	0.027027	0.0135135			2.05548	0.992702	1.33409	1.33409
chr1q31	CFH	0	0	0	0.0642202	0.25	0.15711	0.211009	0.171053	0.191031	0	0.0131579	0.00657895		loss	-4.35519	-7.32506	-7.05783	-7.05783
chr1q31	CFHR4	0	0	0	0.0694444	0.172414	0.120929	0.222222	0.137931	0.180077	0	0	0			-1.93957	-1.75416	-1.89118	-1.89118
chr1q31	CFHR3	0	0	0	0.0694444	0.178571	0.124008	0.222222	0.214286	0.218254	0	0	0			-3.20496	-4.85683	-4.88392	-4.85683
chr1q31	CFHR1	0	0	0	0.0694444	0.214286	0.141865	0.222222	0.142857	0.18254	0	0.0357143	0.0178571			NA	-1.6479	-1.84745	-1.74767
chr1q31	CFHR2	0	0	0	0.0694444	0.172414	0.120929	0.222222	0.137931	0.180077	0	0	0			-3.35399	-0.611623	-1.10477	-1.10477
chr1q31	CFHR5	0	0	0	0.0694444	0.172414	0.120929	0.222222	0.137931	0.180077	0	0	0			-1.28292	-0.581433	-1.73977	-1.28292
chr1q31	F13B	0	0	0	0.0694444	0.172414	0.120929	0.222222	0.137931	0.180077	0	0	0			-0.803397	-0.811425	0.0375392	-0.803397
chr1q31	ASPM	0	0	0	0.0694444	0.172414	0.120929	0.222222	0.137931	0.180077	0	0	0			2.84037	-0.85702	-0.731034	-0.731034
chr1q31	ZBTB41	0	0	0	0.0694444	0.172414	0.120929	0.222222	0.137931	0.180077	0	0	0			0.517074	0.594314	3.14878	0.594314
chr1q31	CRB1	0	0	0	0.0694444	0.172414	0.120929	0.222222	0.137931	0.180077	0	0	0			2.94167	2.66683	6.39777	2.94167
chr1q31	DENND1B	0	0	0	0.0735294	0.125	0.0992647	0.220588	0.166667	0.193627	0	0	0			-2.27788	-2.21055	-1.53074	-2.21055
chr1q31	C1orf53	0	0	0	0.0694444	0.142857	0.106151	0.222222	0.142857	0.18254	0	0	0			-1.98418	-5.54925	-3.53053	-3.53053
chr1q31	LHX9	0	0	0	0.0694444	0.142857	0.106151	0.222222	0.142857	0.18254	0	0	0			-0.166041	-2.3827	-1.37665	-1.37665
chr1q31	NEK7	0	0	0	0.0648148	0.24	0.152407	0.194444	0.16	0.177222	0	0.0133333	0.00666666			0.935783	1.61339	4.0364	1.61339
chr1q31	ATP6V1G3	0	0	0	0.0694444	0.172414	0.120929	0.222222	0.137931	0.180077	0	0	0			-1.95755	-2.81941	-3.13825	-2.81941
chr1q31	PTPRC	0	0	0	0.0694444	0.172414	0.120929	0.222222	0.137931	0.180077	0	0	0			-1.04543	-2.3755	-2.0377	-2.0377
chr1q32	NR5A2	0	0	0	0.0733945	0.191781	0.132588	0.211009	0.205479	0.208244	0	0.0136986	0.00684931			0.806306	0.937853	-2.55314	0.806306
chr1q32	ZNF281	0	0	0	0.0694444	0.137931	0.103688	0.277778	0.206897	0.242337	0	0	0			2.40463	1.95044	NA	2.17754
chr1q32	KIF14	0	0	0	0.0694444	0.137931	0.103688	0.277778	0.206897	0.242337	0	0	0			2.76546	-0.510116	0.184899	0.184899
chr1q32	DDX59	0	0	0	0.0694444	0.137931	0.103688	0.277778	0.206897	0.242337	0	0	0			-0.0690787	3.62275	6.53519	3.62275
chr1q32	CAMSAP2	0	0	0	0.0694444	0.137931	0.103688	0.277778	0.241379	0.259579	0	0	0			0.363394	NA	2.11521	1.2393
chr1q32	GPR25	0	0	0	0.0694444	0.137931	0.103688	0.305556	0.241379	0.273467	0	0	0			0.0962391	-1.81453	-1.90135	-1.81453
chr1q32	KIF21B	0	0	0	0.0694444	0.178571	0.124008	0.305556	0.214286	0.259921	0	0	0			-3.27592	-3.63083	-3.93082	-3.63083
chr1q32	CACNA1S	0	0	0	0.0694444	0.172414	0.120929	0.305556	0.241379	0.273467	0	0	0			-1.99978	-2.80368	-1.13377	-1.99978
chr1q32	ASCL5	0	0	0	0.0694444	0.172414	0.120929	0.305556	0.241379	0.273467	0	0	0			0.799764	NA	2.73525	1.76751
chr1q32	TMEM9	0	0	0	0.0694444	0.172414	0.120929	0.305556	0.241379	0.273467	0	0	0			1.40594	0.713764	1.79888	1.40594
chr1q32	IGFN1	0	0	0	0.0694444	0.172414	0.120929	0.305556	0.241379	0.273467	0	0	0			1.96459	2.04374	2.00577	2.00577
chr1q32	PKP1	0	0	0	0.0694444	0.172414	0.120929	0.319444	0.241379	0.280412	0	0	0			-2.72439	-0.338659	-1.90059	-1.90059
chr1q32	TNNT2	0	0	0	0.0694444	0.172414	0.120929	0.319444	0.241379	0.280412	0	0	0			-2.94152	-2.68495	-0.989591	-2.68495
chr1q32	LAD1	0	0	0	0.0694444	0.172414	0.120929	0.319444	0.241379	0.280412	0	0	0			-2.3356	-2.33437	0.191497	-2.33437
chr1q32	TNNI1	0	0	0	0.0694444	0.172414	0.120929	0.319444	0.241379	0.280412	0	0	0			-4.47182	-3.72425	-0.872842	-3.72425
chr1q32	PHLDA3	0	0	0	0.0694444	0.172414	0.120929	0.319444	0.241379	0.280412	0	0	0			0.236334	-1.00561	2.13376	0.236334
chr1q32	CSRP1	0	0	0	0.0694444	0.172414	0.120929	0.319444	0.241379	0.280412	0	0	0			17.3581	13.4572	14.2944	14.2944
chr1q32	NAV1	0	0	0	0.0792079	0.219178	0.149193	0.247525	0.205479	0.226502	0	0.0136986	0.00684931			-6.51487	-4.16526	-4.50863	-4.50863
chr1q32	IPO9	0	0	0	0.0833333	0.172414	0.127874	0.291667	0.241379	0.266523	0	0	0			2.06276	2.46633	-1.05295	2.06276
chr1q32	SHISA4	0	0	0	0.0833333	0.172414	0.127874	0.319444	0.241379	0.280412	0	0	0			0.291953	0.348411	4.14523	0.348411
chr1q32	LMOD1	0	0	0	0.0833333	0.172414	0.127874	0.319444	0.241379	0.280412	0	0	0			21.5683	13.1954	12.4886	13.1954
chr1q32	TIMM17A	0	0	0	0.0833333	0.178571	0.130952	0.319444	0.214286	0.266865	0	0	0			0.766357	-1.23992	1.65012	0.766357
chr1q32	RNPEP	0	0	0	0.0833333	0.206897	0.145115	0.319444	0.206897	0.26317	0	0	0			-2.80984	-3.63288	-1.22679	-2.80984
chr1q32	ELF3	0	0	0	0.0833333	0.206897	0.145115	0.319444	0.206897	0.26317	0	0	0			0.243603	2.86422	1.1689	1.1689
chr1q32	GPR37L1	0	0	0	0.0833333	0.172414	0.127874	0.319444	0.241379	0.280412	0	0	0			-0.451563	3.69236	0.659604	0.659604
chr1q32	ARL8A	0	0	0	0.0833333	0.172414	0.127874	0.319444	0.241379	0.280412	0	0	0			0.0632628	-0.219238	0.958329	0.0632628
chr1q32	PTPN7	0	0	0	0.0833333	0.172414	0.127874	0.319444	0.241379	0.280412	0	0	0			-0.649677	-2.98775	-1.77964	-1.77964
chr1q32	LGR6	0	0	0	0.0833333	0.185185	0.134259	0.319444	0.222222	0.270833	0	0	0			-1.85411	2.29958	1.97426	1.97426
chr1q32	UBE2T	0	0	0	0.0833333	0.206897	0.145115	0.291667	0.206897	0.249282	0	0	0			5.88538	2.50083	2.26013	2.50083
chr1q32	PPP1R12B	0	0	0	0.0841121	0.24	0.162056	0.214953	0.173333	0.194143	0	0.0133333	0.00666666			16.0795	14.2777	13.9744	14.2777
chr1q32	SYT2	0	0	0	0.0642202	0.24	0.15211	0.247706	0.173333	0.21052	0	0.0133333	0.00666666			-1.18105	4.74674	9.17637	4.74674
chr1q32	KDM5B	0	0	0	0.0555556	0.206897	0.131226	0.333333	0.206897	0.270115	0	0	0			-2.00929	-2.32481	-0.446982	-2.00929
chr1q32	RABIF	0	0	0	0.0555556	0.206897	0.131226	0.333333	0.206897	0.270115	0	0	0			1.57765	-0.282202	1.58457	1.57765
chr1q32	KLHL12	0	0	0	0.0555556	0.206897	0.131226	0.333333	0.206897	0.270115	0	0	0			3.08942	4.42801	3.252	3.252
chr1q32	ADIPOR1	0	0	0	0.0555556	0.206897	0.131226	0.333333	0.206897	0.270115	0	0	0			1.90451	1.08744	1.91293	1.90451
chr1q32	CYB5R1	0	0	0	0.0555556	0.206897	0.131226	0.333333	0.206897	0.270115	0	0	0			2.25793	0.385487	3.43436	2.25793
chr1q32	TMEM183A	0	0	0	0.0555556	0.206897	0.131226	0.333333	0.206897	0.270115	0	0	0			0.645187	0.156321	5.44049	0.645187
chr1q32	PPFIA4	0	0	0	0.0576923	0.24	0.148846	0.259615	0.186667	0.223141	0	0.0133333	0.00666666			1.4197	2.09278	2.43896	2.09278
chr1q32	MYOG	0	0	0	0.0673077	0.24	0.153654	0.25	0.186667	0.218333	0	0.0133333	0.00666666			-1.17545	-2.92198	-1.07855	-1.17545
chr1q32	ADORA1	0	0	0	0.0576923	0.24	0.148846	0.259615	0.186667	0.223141	0	0.0133333	0.00666666			-1.00651	1.80624	2.47208	1.80624
chr1q32	MYBPH	0	0	0	0.0576923	0.24	0.148846	0.25	0.186667	0.218333	0	0.0133333	0.00666666			-2.13497	-2.72251	-0.893226	-2.13497
chr1q32	CHI3L1	0	0	0	0.0673077	0.24	0.153654	0.240385	0.186667	0.213526	0	0.0133333	0.00666666			-2.1564	-1.04873	-1.81981	-1.81981
chr1q32	CHIT1	0	0	0	0.0555556	0.206897	0.131226	0.333333	0.206897	0.270115	0	0	0			-1.40087	-2.23623	-2.0028	-2.0028
chr1q32	BTG2	0	0	0	0.0555556	0.206897	0.131226	0.333333	0.172414	0.252874	0	0	0			2.71475	3.5602	2.24368	2.71475
chr1q32	FMOD	0	0	0	0.0555556	0.206897	0.131226	0.333333	0.172414	0.252874	0	0	0			2.01517	2.94492	5.27158	2.94492
chr1q32	PRELP	0	0	0	0.0555556	0.206897	0.131226	0.333333	0.172414	0.252874	0	0	0			3.87902	6.071	6.4311	6.071
chr1q32	OPTC	0	0	0	0.0555556	0.206897	0.131226	0.333333	0.172414	0.252874	0	0	0			-1.81846	5.55252	5.59217	5.55252
chr1q32	ATP2B4	0	0	0	0.0733945	0.219178	0.146286	0.247706	0.150685	0.199196	0	0.0136986	0.00684931			6.57518	7.06774	8.64357	7.06774
chr1q32	LAX1	0	0	0	0.0733945	0.219178	0.146286	0.247706	0.150685	0.199196	0	0.0136986	0.00684931			-0.508266	0.590785	-0.342918	-0.342918
chr1q32	ZC3H11A	0	0	0	0.0555556	0.206897	0.131226	0.333333	0.172414	0.252874	0	0	0			NA	0.671527	-0.24129	0.215119
chr1q32	ZBED6	0	0	0	0.0555556	0.206897	0.131226	0.333333	0.172414	0.252874	0	0	0			-2.81913	NA	-3.41197	-3.11555
chr1q32	SNRPE	0	0	0	0.0694444	0.206897	0.13817	0.319444	0.172414	0.245929	0	0	0			-1.92089	-2.46987	0.908797	-1.92089
chr1q32	SOX13	0	0	0	0.0733945	0.24	0.156697	0.238532	0.146667	0.192599	0	0.0133333	0.00666666			0.19453	4.27894	3.12458	3.12458
chr1q32	ETNK2	0	0	0	0.0694444	0.172414	0.120929	0.319444	0.206897	0.26317	0	0	0			0.778117	3.17359	3.51628	3.17359
chr1q32	REN	0	0	0	0.0733945	0.226667	0.150031	0.238532	0.173333	0.205933	0	0.0133333	0.00666666			0.850091	3.40552	-0.070762	0.850091
chr1q32	KISS1	0	0	0	0.0733945	0.24	0.156697	0.238532	0.16	0.199266	0	0.0133333	0.00666666			-0.543631	-1.871	0.641192	-0.543631
chr1q32	GOLT1A	0	0	0	0.0642202	0.24	0.15211	0.247706	0.16	0.203853	0	0.0133333	0.00666666			0.310686	3.88813	0.795192	0.795192
chr1q32	PLEKHA6	0	0	0	0.0733945	0.253333	0.163364	0.247706	0.16	0.203853	0.00917431	0.0133333	0.0112538		loss	-0.0377774	0.96742	2.29134	0.96742
chr1q32	PPP1R15B	0	0	0	0.056338	0.206897	0.131617	0.323944	0.172414	0.248179	0	0	0			-0.252733	1.48355	1.37248	1.37248
chr1q32	PIK3C2B	0	0	0	0.0555556	0.206897	0.131226	0.333333	0.172414	0.252874	0	0	0			-0.334282	3.99888	3.21101	3.21101
chr1q32	MDM4	0	0	0	0.0550459	0.263158	0.159102	0.266055	0.171053	0.218554	0	0.0131579	0.00657895		loss	0.835641	2.80985	2.00941	2.00941
chr1q32	LRRN2	0	0	0	0.0642202	0.263158	0.163689	0.256881	0.184211	0.220546	0	0.0131579	0.00657895		loss	-2.05373	2.14636	2.85588	2.14636
chr1q32	NFASC	0	0	0	0.0833333	0.293333	0.188333	0.25	0.186667	0.218333	0	0.0133333	0.00666666		loss	10.3585	7.15758	10.1812	10.1812
chr1q32	CNTN2	0	0	0	0.0648148	0.266667	0.165741	0.25	0.186667	0.218333	0	0.0133333	0.00666666		loss	-0.0539064	1.52071	1.69028	1.52071
chr1q32	TMEM81	0	0	0	0.0648148	0.253333	0.159074	0.25	0.186667	0.218333	0	0.0133333	0.00666666		loss	NA	-2.88164	-0.541139	-1.71139
chr1q32	RBBP5	0	0	0	0.0648148	0.266667	0.165741	0.25	0.186667	0.218333	0	0.0133333	0.00666666		loss	0.892074	1.81837	1.46372	1.46372
chr1q32	DSTYK	0	0	0	0.0694444	0.206897	0.13817	0.319444	0.206897	0.26317	0	0	0			-1.55577	1.46286	1.19982	1.19982
chr1q32	TMCC2	0	0	0	0.0642202	0.253333	0.158777	0.266055	0.186667	0.226361	0	0.0133333	0.00666666		loss	0.884153	0.625948	6.4864	0.884153
chr1q32	NUAK2	0	0	0	0.0642202	0.253333	0.158777	0.266055	0.186667	0.226361	0	0.0133333	0.00666666		loss	NA	0.731025	1.16604	0.948535
chr1q32	KLHDC8A	0	0	0	0.0642202	0.266667	0.165443	0.247706	0.173333	0.21052	0	0.0133333	0.00666666		loss	-0.390638	-1.09506	0.964383	-0.390638
chr1q32	LEMD1	0	0	0	0.0694444	0.241379	0.155412	0.319444	0.172414	0.245929	0	0	0			-1.49252	-1.64899	1.32577	-1.49252
chr1q32	CDK18	0	0	0	0.0694444	0.241379	0.155412	0.319444	0.172414	0.245929	0	0	0			5.29271	7.02209	4.72865	5.29271
chr1q32	ELK4	0	0	0	0.0694444	0.241379	0.155412	0.305556	0.172414	0.238985	0	0	0			-3.95447	-0.282102	-1.77257	-1.77257
chr1q32	SLC45A3	0	0	0	0.0694444	0.241379	0.155412	0.319444	0.172414	0.245929	0	0	0			-2.03041	-2.61611	-1.9532	-2.03041
chr1q32	NUCKS1	0	0	0	0.0642202	0.289474	0.176847	0.247706	0.157895	0.202801	0	0.0131579	0.00657895		loss	2.75284	2.20343	4.77565	2.75284
chr1q32	SLC41A1	0	0	0	0.0733945	0.289474	0.181434	0.238532	0.157895	0.198213	0	0.0131579	0.00657895		loss	3.57629	6.44566	3.71414	3.71414
chr1q32	PM20D1	0	0	0	0.0733945	0.302632	0.188013	0.238532	0.157895	0.198213	0	0.0131579	0.00657895		loss	-0.777762	-0.757682	-1.11252	-0.777762
chr1q32	SLC26A9	0	0	0	0.0694444	0.241379	0.155412	0.305556	0.172414	0.238985	0	0	0			-0.993169	1.90827	1.5381	1.5381
chr1q32	FAM72A	0	0	0	0.0769231	0.166667	0.121795	0.338462	0.166667	0.252564	0	0	0			0.446484	-2.33872	-0.96585	-0.96585
chr1q32	AVPR1B	0	0	0	0.0694444	0.206897	0.13817	0.291667	0.137931	0.214799	0	0	0			-1.19889	-1.14897	0.0916205	-1.14897
chr1q32	CTSE	0	0	0	0.0694444	0.206897	0.13817	0.291667	0.137931	0.214799	0	0	0			-1.12968	-1.38933	-1.88743	-1.38933
chr1q32	SRGAP2	0	0	0	0.0833333	0.208333	0.145833	0.283333	0.125	0.204167	0	0	0			-2.08832	-3.43117	-8.30936	-3.43117
chr1q32	IKBKE	0	0	0	0.0694444	0.241379	0.155412	0.291667	0.137931	0.214799	0	0	0			-3.29713	-5.2619	-3.52549	-3.52549
chr1q32	RASSF5	0	0	0	0.0694444	0.241379	0.155412	0.291667	0.137931	0.214799	0	0	0			-1.22861	-0.841535	-0.493305	-0.841535
chr1q32	EIF2D	0	0	0	0.0694444	0.241379	0.155412	0.291667	0.137931	0.214799	0	0	0			1.22436	NA	2.61729	1.92083
chr1q32	DYRK3	0	0	0	0.0694444	0.241379	0.155412	0.291667	0.137931	0.214799	0	0	0			-0.384265	-0.0455397	-1.31772	-0.384265
chr1q32	MAPKAPK2	0	0	0	0.0679612	0.315068	0.191515	0.223301	0.150685	0.186993	0	0.0136986	0.00684931		loss	-1.29808	-1.8439	-0.326911	-1.29808
chr1q32	IL10	0	0	0	0.0679612	0.273973	0.170967	0.223301	0.150685	0.186993	0	0.0136986	0.00684931		loss	-1.84531	-4.44356	-3.4084	-3.4084
chr1q32	IL19	0	0	0	0.0679612	0.287671	0.177816	0.213592	0.150685	0.182139	0	0.0136986	0.00684931		loss	0.801248	-1.94892	-2.13569	-1.94892
chr1q32	IL20	0	0	0	0.0694444	0.206897	0.13817	0.291667	0.172414	0.23204	0	0	0			3.52629	8.51319	3.23753	3.52629
chr1q32	IL24	0	0	0	0.0694444	0.206897	0.13817	0.291667	0.172414	0.23204	0	0	0			3.21711	6.68473	2.89134	3.21711
chr1q32	PIGR	0	0	0	0.0694444	0.206897	0.13817	0.291667	0.172414	0.23204	0	0	0			-0.20166	-0.474266	-0.346193	-0.346193
chr1q32	FCAMR	0	0	0	0.0694444	0.206897	0.13817	0.291667	0.172414	0.23204	0	0	0			-0.777751	-0.292594	1.42607	-0.292594
chr1q32	C1orf116	0	0	0	0.0694444	0.206897	0.13817	0.277778	0.172414	0.225096	0	0	0			-1.70618	-1.24226	0.897312	-1.24226
chr1q32	PFKFB2	0	0	0	0.0642202	0.302632	0.183426	0.201835	0.144737	0.173286	0	0.0131579	0.00657895		loss	-1.96142	2.06011	-0.819454	-0.819454
chr1q32	YOD1	0	0	0	0.0642202	0.302632	0.183426	0.201835	0.144737	0.173286	0	0.0131579	0.00657895		loss	3.13581	2.04337	1.5658	2.04337
chr1q32	C4BPB	0	0	0	0.0642202	0.302632	0.183426	0.201835	0.144737	0.173286	0	0.0131579	0.00657895		loss	-2.41528	-3.44814	-0.794633	-2.41528
chr1q32	C4BPA	0	0	0	0.0642202	0.302632	0.183426	0.201835	0.144737	0.173286	0	0.0131579	0.00657895		loss	-1.17155	-0.598614	0.516875	-0.598614
chr1q32	CD55	0	0	0	0.0694444	0.206897	0.13817	0.277778	0.172414	0.225096	0	0	0			-5.42592	-2.57916	-4.91159	-4.91159
chr1q32	CR2	0	0	0	0.0694444	0.206897	0.13817	0.277778	0.172414	0.225096	0	0	0			-1.76554	-1.0599	-1.54868	-1.54868
chr1q32	CR1	0	0	0	0.0761905	0.309859	0.193025	0.209524	0.0985915	0.154058	0	0.0140845	0.00704225		loss	-3.54534	-1.8864	-2.26296	-2.26296
chr1q32	CR1L	0	0	0	0.0648148	0.310811	0.187813	0.212963	0.0945946	0.153779	0	0.027027	0.0135135		loss	-0.0860928	-1.65534	-1.62146	-1.62146
chr1q32	CD46	0	0	0	0.0694444	0.241379	0.155412	0.277778	0.103448	0.190613	0	0.0344828	0.0172414			4.51319	6.1074	5.37627	5.37627
chr1q32	CD34	0	0	0	0.0654206	0.328767	0.197094	0.214953	0.109589	0.162271	0	0.0136986	0.00684931		loss	-2.43394	0.825246	-1.102	-1.102
chr1q32	PLXNA2	0	0	0	0.0654206	0.342466	0.203943	0.252336	0.123288	0.187812	0	0.0136986	0.00684931		loss	-0.896782	3.22012	-1.40495	-0.896782
chr1q32	MIR205HG	0	0	0	0.0555556	0.241379	0.148467	0.277778	0.103448	0.190613	0	0	0			-0.693762	NA	1.13101	0.218625
chr1q32	CAMK1G	0	0	0	0.0550459	0.315789	0.185418	0.211009	0.131579	0.171294	0	0.0131579	0.00657895		loss	-2.17804	-0.757021	-0.299927	-0.757021
chr1q32	LAMB3	0	0	0	0.0642202	0.328947	0.196584	0.211009	0.131579	0.171294	0	0.0131579	0.00657895		loss	0.823157	1.63388	0.881082	0.881082
chr1q32	G0S2	0	0	0	0.0555556	0.206897	0.131226	0.277778	0.137931	0.207854	0	0	0			-0.368736	-1.12608	0.480775	-0.368736
chr1q32	HSD11B1	0	0	0	0.0576923	0.310811	0.184252	0.211538	0.121622	0.16658	0	0.0135135	0.00675675		loss	3.2813	3.70884	2.23101	3.2813
chr1q32	TRAF3IP3	0	0	0	0.0576923	0.310811	0.184252	0.211538	0.121622	0.16658	0	0.0135135	0.00675675		loss	0.903133	-0.998161	-0.829888	-0.829888
chr1q32	C1orf74	0	0	0	0.0555556	0.206897	0.131226	0.277778	0.137931	0.207854	0	0	0			1.47101	2.52106	2.11448	2.11448
chr1q32	IRF6	0	0	0	0.0576923	0.310811	0.184252	0.211538	0.121622	0.16658	0	0.0135135	0.00675675		loss	4.53145	14.2125	5.12335	5.12335
chr1q32	SYT14	0	0	0	0.0566038	0.306667	0.181635	0.216981	0.133333	0.175157	0	0.0133333	0.00666666		loss	-1.01439	-0.264139	-1.11356	-1.01439
chr1q32	SERTAD4	0	0	0	0.0694444	0.206897	0.13817	0.263889	0.137931	0.20091	0	0	0			3.53646	3.071	3.14684	3.14684
chr1q32	HHAT	0	0.0344828	0.0172414	0.0694444	0.206897	0.13817	0.263889	0.103448	0.183669	0	0	0			-1.35886	-1.23924	0.966666	-1.23924
chr1q32	KCNH1	0.0138889	0	0.00694444	0.0833333	0.25	0.166667	0.263889	0.107143	0.185516	0	0	0			-1.62101	-1.32486	-0.538419	-1.32486
chr1q32	RCOR3	0	0	0	0.0642202	0.355263	0.209742	0.201835	0.105263	0.153549	0	0.0131579	0.00657895		loss	6.03657	4.47647	7.34678	6.03657
chr1q32	TRAF5	0	0	0	0.0694444	0.275862	0.172653	0.263889	0.103448	0.183669	0	0	0		loss	10.7964	8.7991	7.75346	8.7991
chr1q32	RD3	0	0	0	0.0694444	0.275862	0.172653	0.263889	0.103448	0.183669	0	0	0		loss	1.31715	1.58476	-0.204847	1.31715
chr1q32	SLC30A1	0	0	0	0.0694444	0.275862	0.172653	0.263889	0.103448	0.183669	0	0	0		loss	-1.83122	-0.164848	-1.03281	-1.03281
chr1q32	NEK2	0	0	0	0.0694444	0.275862	0.172653	0.263889	0.103448	0.183669	0	0	0		loss	3.42892	-2.38056	-0.263014	-0.263014
chr1q32	LPGAT1	0	0	0	0.0648148	0.368421	0.216618	0.203704	0.0921053	0.147904	0	0.0131579	0.00657895		loss	1.72552	0.304405	1.35142	1.35142
chr1q32	INTS7	0	0	0	0.0694444	0.275862	0.172653	0.263889	0.103448	0.183669	0	0	0		loss	8.18652	5.43797	3.08981	5.43797
chr1q32	DTL	0	0	0	0.0694444	0.275862	0.172653	0.263889	0.103448	0.183669	0	0	0		loss	8.60585	3.71047	3.41924	3.71047
chr1q32	PPP2R5A	0	0	0	0.0694444	0.25	0.159722	0.263889	0.107143	0.185516	0	0	0			6.15443	6.59822	7.56366	6.59822
chr1q32	NENF	0	0	0	0.0694444	0.275862	0.172653	0.263889	0.103448	0.183669	0	0	0		loss	6.74346	3.82046	8.4108	6.74346
chr1q32	ATF3	0	0	0	0.0642202	0.373333	0.218777	0.201835	0.08	0.140917	0	0.0133333	0.00666666		loss	9.01599	3.76099	3.07651	3.76099
chr1q32	FAM71A	0	0	0	0.0642202	0.373333	0.218777	0.201835	0.08	0.140917	0	0.0133333	0.00666666		loss	-2.40437	4.06723	2.01332	2.01332
chr1q32	BATF3	0	0	0	0.0642202	0.386667	0.225443	0.201835	0.08	0.140917	0	0.0133333	0.00666666		loss	6.06248	2.95212	1.74483	2.95212
chr1q32	NSL1	0	0	0	0.0642202	0.378378	0.221299	0.211009	0.0810811	0.146045	0	0.0135135	0.00675675		loss	3.6593	2.37764	2.16944	2.37764
chr1q32	TATDN3	0	0	0	0.0642202	0.364865	0.214543	0.211009	0.0810811	0.146045	0	0.0135135	0.00675675		loss	1.73791	1.57755	2.20397	1.73791
chr1q32	FLVCR1	0	0	0	0.0733945	0.391892	0.232643	0.201835	0.0810811	0.141458	0	0.0135135	0.00675675		loss	3.31328	2.05458	2.99273	2.99273
chr1q32	VASH2	0	0	0	0.0694444	0.241379	0.155412	0.263889	0.103448	0.183669	0	0	0			-6.08866	-4.12373	-2.657	-4.12373
chr1q32	ANGEL2	0	0	0	0.0694444	0.241379	0.155412	0.263889	0.103448	0.183669	0	0	0			3.88421	2.5	5.54166	3.88421
chr1q32	RPS6KC1	0	0	0	0.0694444	0.241379	0.155412	0.263889	0.103448	0.183669	0	0	0			5.10006	5.2276	4.35868	5.10006
chr1q32	PROX1	0	0	0	0.0694444	0.241379	0.155412	0.263889	0.103448	0.183669	0	0	0			-1.27571	-1.61384	-0.884942	-1.27571
chr1q32	SMYD2	0	0	0	0.0733945	0.394737	0.234066	0.201835	0.0789474	0.140391	0	0.0131579	0.00657895		loss	-3.88282	-3.32665	-4.24648	-3.88282
chr1q41	PTPN14	0	0.0131579	0.00657895	0.0733945	0.407895	0.240645	0.201835	0.0789474	0.140391	0	0	0		loss	0.58182	0.198558	-0.103734	0.198558
chr1q41	CENPF	0	0	0	0.0704225	0.241379	0.155901	0.239437	0.103448	0.171442	0	0	0			4.24248	-0.737446	-0.157115	-0.157115
chr1q41	KCNK2	0	0	0	0.0694444	0.275862	0.172653	0.236111	0.103448	0.16978	0	0	0		loss	-3.05183	-5.8032	-3.07976	-3.07976
chr1q41	KCTD3	0	0	0	0.0747664	0.393939	0.234353	0.186916	0.0757576	0.131337	0	0.0151515	0.00757576		loss	3.38516	3.25832	4.40595	3.38516
chr1q41	USH2A	0	0.0151515	0.00757576	0.0841121	0.424242	0.254177	0.196262	0.0757576	0.13601	0	0.0151515	0.00757576		loss	1.00043	4.90181	2.14011	2.14011
chr1q41	ESRRG	0	0	0	0.0833333	0.405405	0.244369	0.185185	0.0810811	0.133133	0	0.0135135	0.00675675		loss	-2.16043	-0.346733	-0.0604676	-0.346733
chr1q41	GPATCH2	0	0	0	0.0833333	0.388889	0.236111	0.185185	0.0694444	0.127315	0	0.0138889	0.00694444		loss	0.664664	-0.478432	0.0165402	0.0165402
chr1q41	SPATA17	0	0	0	0.0952381	0.382353	0.238796	0.190476	0.0735294	0.132003	0	0.0147059	0.00735294		loss	-1.30823	-1.92148	-2.43565	-1.92148
chr1q41	RRP15	0	0	0	0.0841121	0.364865	0.224489	0.186916	0.0810811	0.133998	0	0.0135135	0.00675675		loss	1.58789	-2.8322	0.826718	0.826718
chr1q41	TGFB2	0	0	0	0.0825688	0.394737	0.238653	0.183486	0.0789474	0.131217	0	0.0131579	0.00657895		loss	0.120531	0.955723	1.27989	0.955723
chr1q41	LYPLAL1	0	0	0	0.0694444	0.275862	0.172653	0.236111	0.103448	0.16978	0	0	0		loss	5.77038	4.74206	3.54768	4.74206
chr1q41	SLC30A10	0	0	0	0.0833333	0.375	0.229167	0.185185	0.0972222	0.141204	0	0.0138889	0.00694444		loss	-1.25819	-2.40718	1.60985	-1.25819
chr1q41	BPNT1	0	0	0	0.0694444	0.241379	0.155412	0.236111	0.137931	0.187021	0	0	0			0.578806	0.798638	1.55432	0.798638
chr1q41	IARS2	0	0	0	0.0694444	0.241379	0.155412	0.236111	0.137931	0.187021	0	0	0			2.05966	1.46803	2.03244	2.03244
chr1q41	RAB3GAP2	0	0	0	0.0694444	0.241379	0.155412	0.236111	0.137931	0.187021	0	0	0			NA	2.30254	2.12252	2.21253
chr1q41	MARK1	0	0	0	0.0694444	0.241379	0.155412	0.236111	0.137931	0.187021	0	0	0			3.12266	4.43695	1.29993	3.12266
chr1q41	C1orf115	0	0	0	0.0694444	0.241379	0.155412	0.25	0.137931	0.193966	0	0	0			1.65624	2.02495	2.48054	2.02495
chr1q41	MARC2	0	0	0	0.0694444	0.241379	0.155412	0.25	0.103448	0.176724	0	0	0			5.25186	NA	3.42364	4.33775
chr1q41	MARC1	0	0	0	0.0694444	0.241379	0.155412	0.25	0.103448	0.176724	0	0	0			1.0462	NA	1.26165	1.15392
chr1q41	HLX	0	0	0	0.0694444	0.241379	0.155412	0.25	0.103448	0.176724	0	0	0			-1.50256	0.294666	-1.09084	-1.09084
chr1q41	DUSP10	0	0	0	0.0694444	0.241379	0.155412	0.25	0.103448	0.176724	0	0	0			-0.95004	-3.2908	-1.08403	-1.08403
chr1q41	HHIPL2	0	0	0	0.0694444	0.241379	0.155412	0.25	0.103448	0.176724	0	0	0			0.71591	-0.784608	-0.0739265	-0.0739265
chr1q41	TAF1A	0	0	0	0.0694444	0.241379	0.155412	0.25	0.103448	0.176724	0	0	0			-3.55321	-3.2948	-3.92578	-3.55321
chr1q41	MIA3	0	0	0	0.0694444	0.241379	0.155412	0.25	0.103448	0.176724	0	0	0			0.393882	0.0477134	0.0492519	0.0492519
chr1q41	AIDA	0	0	0	0.0694444	0.241379	0.155412	0.25	0.103448	0.176724	0	0	0			4.56618	1.75074	2.69578	2.69578
chr1q41	BROX	0	0	0	0.0694444	0.241379	0.155412	0.25	0.103448	0.176724	0	0	0			2.56848	NA	2.8782	2.72334
chr1q41	FAM177B	0	0	0	0.0694444	0.241379	0.155412	0.25	0.103448	0.176724	0	0	0			NA	-1.41541	0.263448	-0.57598
chr1q41	DISP1	0	0	0	0.0694444	0.241379	0.155412	0.25	0.103448	0.176724	0	0	0			-1.40339	-0.491635	-0.734407	-0.734407
chr1q41	TLR5	0	0	0	0.0784314	0.369231	0.223831	0.205882	0.0769231	0.141403	0	0.0153846	0.00769231		loss	0.293983	2.98216	2.03858	2.03858
chr1q41	SUSD4	0	0.0131579	0.00657895	0.0825688	0.421053	0.251811	0.201835	0.0657895	0.133812	0	0.0131579	0.00657895		loss	3.17289	6.59888	5.42385	5.42385
chr1q41	CAPN8	0	0	0	0.0746269	0.259259	0.166943	0.268657	0.111111	0.189884	0	0	0			-1.19739	1.56949	3.32637	1.56949
chr1q41	CAPN2	0	0	0	0.0833333	0.275862	0.179598	0.277778	0.103448	0.190613	0	0	0			3.82064	2.2801	4.02381	3.82064
chr1q41	TP53BP2	0	0	0	0.0833333	0.275862	0.179598	0.277778	0.103448	0.190613	0	0	0			-1.9521	0.098682	-0.736691	-0.736691
chr1q42	FBXO28	0	0	0	0.0833333	0.275862	0.179598	0.263889	0.103448	0.183669	0	0	0			1.92295	3.79331	5.32934	3.79331
chr1q42	DEGS1	0	0	0	0.0833333	0.275862	0.179598	0.263889	0.103448	0.183669	0	0	0			6.31111	4.99889	6.46371	6.31111
chr1q42	NVL	0	0	0	0.0833333	0.275862	0.179598	0.263889	0.103448	0.183669	0	0	0			3.63329	1.86114	1.90466	1.90466
chr1q42	CNIH4	0	0	0	0.0833333	0.275862	0.179598	0.263889	0.103448	0.183669	0	0	0			1.4385	-0.026717	3.52841	1.4385
chr1q42	WDR26	0	0	0	0.0833333	0.275862	0.179598	0.263889	0.103448	0.183669	0	0	0			0.206222	1.02093	1.95994	1.02093
chr1q42	CNIH3	0	0	0	0.0833333	0.285714	0.184524	0.263889	0.107143	0.185516	0	0	0			-6.60319	-7.93683	-4.26871	-6.60319
chr1q42	DNAH14	0	0	0	0.0934579	0.410959	0.252208	0.214953	0.0684932	0.141723	0	0.0136986	0.00684931		loss	-1.14753	-4.02172	-1.9393	-1.9393
chr1q42	LBR	0	0	0	0.0833333	0.275862	0.179598	0.263889	0.103448	0.183669	0	0	0			10.4373	9.9561	7.50603	9.9561
chr1q42	ENAH	0	0	0	0.084507	0.275862	0.180185	0.267606	0.103448	0.185527	0	0	0			2.06477	1.71551	0.886138	1.71551
chr1q42	SRP9	0	0	0	0.0833333	0.275862	0.179598	0.291667	0.103448	0.197557	0	0	0			2.62531	0.480314	3.02512	2.62531
chr1q42	EPHX1	0	0	0	0.0833333	0.275862	0.179598	0.291667	0.103448	0.197557	0	0	0			0.358488	1.04009	-0.332593	0.358488
chr1q42	TMEM63A	0	0	0	0.0833333	0.275862	0.179598	0.291667	0.103448	0.197557	0	0	0			1.26849	2.60712	3.66625	2.60712
chr1q42	LEFTY1	0	0	0	0.0833333	0.275862	0.179598	0.291667	0.103448	0.197557	0	0	0			-0.759977	4.44975	3.34152	3.34152
chr1q42	PYCR2	0	0	0	0.0833333	0.275862	0.179598	0.291667	0.103448	0.197557	0	0	0			3.3956	2.65302	4.12135	3.3956
chr1q42	LEFTY2	0	0	0	0.0833333	0.275862	0.179598	0.291667	0.103448	0.197557	0	0	0			3.31177	6.72153	4.36729	4.36729
chr1q42	SDE2	0	0	0	0.0833333	0.275862	0.179598	0.291667	0.103448	0.197557	0	0	0			0.819594	NA	3.43373	2.12666
chr1q42	ACBD3	0	0	0	0.0833333	0.275862	0.179598	0.277778	0.103448	0.190613	0	0	0			-1.21762	-2.56862	-1.8647	-1.8647
chr1q42	MIXL1	0	0	0	0.0833333	0.275862	0.179598	0.291667	0.103448	0.197557	0	0	0			-1.325	0.639009	0.333203	0.333203
chr1q42	LIN9	0	0	0	0.0833333	0.275862	0.179598	0.291667	0.103448	0.197557	0	0	0			3.80644	4.58418	5.06213	4.58418
chr1q42	PARP1	0	0	0	0.0961538	0.410959	0.253556	0.221154	0.0684932	0.144823	0	0.0136986	0.00684931		loss	0.751286	-0.861679	-1.07109	-0.861679
chr1q42	ITPKB	0	0	0	0.0833333	0.391892	0.237613	0.222222	0.0675676	0.144895	0	0.0135135	0.00675675		loss	1.60737	3.35217	0.551998	1.60737
chr1q42	PSEN2	0	0	0	0.0833333	0.241379	0.162356	0.291667	0.103448	0.197557	0	0	0			0.803106	1.76202	1.32218	1.32218
chr1q42	CDC42BPA	0	0	0	0.104762	0.405405	0.255084	0.190476	0.0675676	0.129022	0	0.0135135	0.00675675		loss	0.655816	2.22234	2.07836	2.07836
chr1q42	ZNF678	0	0	0	0.0833333	0.275862	0.179598	0.236111	0.103448	0.16978	0	0	0			-1.19344	-1.74967	-0.325849	-1.19344
chr1q42	SNAP47	0	0	0	0.0833333	0.241379	0.162356	0.291667	0.103448	0.197557	0	0	0			NA	0.834398	3.70459	2.2695
chr1q42	JMJD4	0	0	0	0.0833333	0.241379	0.162356	0.291667	0.103448	0.197557	0	0	0			-1.93993	-1.24749	2.86149	-1.24749
chr1q42	PRSS38	0	0	0	0.0833333	0.275862	0.179598	0.263889	0.103448	0.183669	0	0	0			NA	-1.33637	1.21539	-0.0604924
chr1q42	WNT9A	0.00934579	0	0.0046729	0.0934579	0.4	0.246729	0.214953	0.0666667	0.14081	0	0.0133333	0.00666666		loss	-3.22136	-0.464319	1.49868	-0.464319
chr1q42	WNT3A	0	0	0	0.101852	0.4	0.250926	0.222222	0.0666667	0.144444	0	0.0133333	0.00666666		loss	NA	-0.326544	-2.5261	-1.42632
chr1q42	ARF1	0	0	0	0.0972222	0.241379	0.169301	0.305556	0.103448	0.204502	0	0	0			-1.07416	-2.79484	-0.159978	-1.07416
chr1q42	C1orf35	0	0	0	0.0972222	0.241379	0.169301	0.305556	0.103448	0.204502	0	0	0			3.34046	2.63882	4.06365	3.34046
chr1q42	MRPL55	0	0	0	0.0972222	0.241379	0.169301	0.305556	0.103448	0.204502	0	0	0			3.89749	0.411752	2.68718	2.68718
chr1q42	GUK1	0	0	0	0.0972222	0.241379	0.169301	0.305556	0.103448	0.204502	0	0	0			-0.199701	-2.20972	0.873027	-0.199701
chr1q42	GJC2	0	0	0	0.0972222	0.241379	0.169301	0.305556	0.103448	0.204502	0	0	0			-0.243255	-1.94049	0.37699	-0.243255
chr1q42	IBA57	0	0	0	0.0972222	0.241379	0.169301	0.305556	0.103448	0.204502	0	0	0			-1.63944	NA	-0.111697	-0.875571
chr1q42	OBSCN	0	0	0	0.1	0.241379	0.17069	0.285714	0.103448	0.194581	0	0	0			-2.6928	-0.340035	1.41458	-0.340035
chr1q42	TRIM11	0	0	0	0.0972222	0.241379	0.169301	0.305556	0.103448	0.204502	0	0	0			-1.10638	-1.65291	0.309629	-1.10638
chr1q42	TRIM17	0	0	0	0.0972222	0.241379	0.169301	0.305556	0.103448	0.204502	0	0	0			-0.571463	-0.163855	-0.212729	-0.212729
chr1q42	RNF187	0	0	0	0.0972222	0.241379	0.169301	0.305556	0.103448	0.204502	0	0	0			-0.635146	-3.04437	1.30805	-0.635146
chr1q42	RHOU	0	0	0	0.0972222	0.275862	0.186542	0.25	0.103448	0.176724	0	0	0			0.864153	0.138286	0.915893	0.864153
chr1q42	RAB4A	0	0	0	0.0972222	0.275862	0.186542	0.25	0.103448	0.176724	0	0	0			3.30476	1.43368	3.56483	3.30476
chr1q42	CCSAP	0	0	0	0.0972222	0.275862	0.186542	0.25	0.103448	0.176724	0	0	0			6.27387	NA	3.99901	5.13644
chr1q42	ACTA1	0	0	0	0.0972222	0.275862	0.186542	0.25	0.103448	0.176724	0	0	0			5.1056	3.73757	5.78674	5.1056
chr1q42	NUP133	0	0	0	0.0972222	0.275862	0.186542	0.25	0.103448	0.176724	0	0	0			3.9411	3.29988	5.52552	3.9411
chr1q42	ABCB10	0	0	0	0.0972222	0.275862	0.186542	0.25	0.103448	0.176724	0	0	0			9.36724	9.85314	9.13774	9.36724
chr1q42	TAF5L	0	0	0	0.0972222	0.275862	0.186542	0.25	0.103448	0.176724	0	0	0			7.57985	8.9224	6.92931	7.57985
chr1q42	URB2	0	0	0	0.0972222	0.275862	0.186542	0.25	0.103448	0.176724	0	0	0			1.05274	-0.339098	-0.704021	-0.339098
chr1q42	GALNT2	0	0	0	0.101852	0.364865	0.233358	0.194444	0.0945946	0.14452	0	0.0135135	0.00675675		loss	-0.00921931	-2.70297	-1.34217	-1.34217
chr1q42	PGBD5	0	0	0	0.0972222	0.275862	0.186542	0.25	0.103448	0.176724	0	0	0			-2.62632	-2.31742	-0.857001	-2.31742
chr1q42	COG2	0	0	0	0.0972222	0.275862	0.186542	0.25	0.103448	0.176724	0	0	0			-1.2419	-1.56516	0.570106	-1.2419
chr1q42	AGT	0	0	0	0.0972222	0.275862	0.186542	0.25	0.103448	0.176724	0	0	0			4.9096	1.25536	0.824312	1.25536
chr1q42	CAPN9	0	0	0	0.0972222	0.275862	0.186542	0.25	0.103448	0.176724	0	0	0			-0.890814	-3.62763	-2.16401	-2.16401
chr1q42	C1orf198	0	0	0	0.0972222	0.275862	0.186542	0.25	0.103448	0.176724	0	0	0			1.86381	0.372453	0.182237	0.372453
chr1q42	TTC13	0	0	0	0.0972222	0.275862	0.186542	0.25	0.103448	0.176724	0	0	0			3.91348	0.0635533	3.20024	3.20024
chr1q42	ARV1	0	0	0	0.101852	0.36	0.230926	0.194444	0.0933333	0.143889	0	0.0133333	0.00666666		loss	4.27416	3.36421	2.89082	3.36421
chr1q42	FAM89A	0	0	0	0.101852	0.36	0.230926	0.194444	0.0933333	0.143889	0	0.0133333	0.00666666		loss	-4.40029	-4.52901	-7.76369	-4.52901
chr1q42	TRIM67	0	0	0	0.0972222	0.275862	0.186542	0.25	0.103448	0.176724	0	0	0			-1.42803	-2.80422	-1.86688	-1.86688
chr1q42	C1orf131	0	0	0	0.0972222	0.275862	0.186542	0.25	0.103448	0.176724	0	0	0			1.56561	-0.373234	0.945092	0.945092
chr1q42	GNPAT	0	0	0	0.0972222	0.275862	0.186542	0.25	0.103448	0.176724	0	0	0			3.55797	0.99106	5.42772	3.55797
chr1q42	EXOC8	0	0	0	0.0972222	0.275862	0.186542	0.25	0.103448	0.176724	0	0	0			2.44421	1.10008	1.27302	1.27302
chr1q42	SPRTN	0	0	0	0.0972222	0.275862	0.186542	0.25	0.103448	0.176724	0	0	0			2.81545	NA	1.00922	1.91233
chr1q42	EGLN1	0	0	0	0.0972222	0.275862	0.186542	0.25	0.103448	0.176724	0	0	0			1.59564	0.289753	2.9047	1.59564
chr1q42	TSNAX	0	0	0	0.0972222	0.275862	0.186542	0.25	0.103448	0.176724	0	0	0			2.46322	2.11272	4.04688	2.46322
chr1q42	DISC1	0	0	0	0.0972222	0.275862	0.186542	0.25	0.103448	0.176724	0	0	0			-4.61342	-3.86563	-5.37194	-4.61342
chr1q42	SIPA1L2	0	0.0131579	0.00657895	0.101852	0.394737	0.248294	0.194444	0.0657895	0.130117	0	0.0131579	0.00657895		loss	-2.79035	-2.17208	-3.44077	-2.79035
chr1q42	MAP10	0	0.0344828	0.0172414	0.0972222	0.275862	0.186542	0.25	0.0689655	0.159483	0	0	0			-1.9374	NA	-0.559441	-1.24842
chr1q42	NTPCR	0	0	0	0.0972222	0.275862	0.186542	0.25	0.103448	0.176724	0	0	0			2.07504	NA	2.08992	2.08248
chr1q42	KCNK1	0	0	0	0.0985915	0.275862	0.187227	0.239437	0.103448	0.171442	0	0	0			0.765533	3.89207	0.696856	0.765533
chr1q42	SLC35F3	0	0	0	0.0985915	0.275862	0.187227	0.239437	0.103448	0.171442	0	0	0			-0.110088	1.08535	2.55334	1.08535
chr1q42	COA6	0	0	0	0.0972222	0.275862	0.186542	0.25	0.103448	0.176724	0	0	0			1.02515	NA	0.229328	0.627237
chr1q42	TARBP1	0	0	0	0.0972222	0.275862	0.186542	0.25	0.103448	0.176724	0	0	0			-3.98278	-4.03144	-3.67696	-3.98278
chr1q42	IRF2BP2	0	0	0	0.102804	0.386667	0.244735	0.186916	0.08	0.133458	0	0.0133333	0.00666666		loss	0.0131388	-1.5595	-1.25539	-1.25539
chr1q42	TOMM20	0	0	0	0.0972222	0.275862	0.186542	0.236111	0.103448	0.16978	0	0	0			0.61874	0.0484637	3.25245	0.61874
chr1q42	RBM34	0	0	0	0.0972222	0.275862	0.186542	0.236111	0.103448	0.16978	0	0	0			0.313714	0.246931	2.38175	0.313714
chr1q42	ARID4B	0	0	0	0.0972222	0.275862	0.186542	0.236111	0.103448	0.16978	0	0	0			2.45181	1.97437	3.16384	2.45181
chr1q42	GGPS1	0	0	0	0.0972222	0.275862	0.186542	0.236111	0.103448	0.16978	0	0	0			4.07286	2.47062	4.17367	4.07286
chr1q42	TBCE	0	0	0	0.0972222	0.275862	0.186542	0.236111	0.103448	0.16978	0	0	0			2.64142	-0.235339	2.20284	2.20284
chr1q42	B3GALNT2	0	0	0	0.0972222	0.275862	0.186542	0.236111	0.103448	0.16978	0	0	0			8.22243	7.80984	12.0516	8.22243
chr1q42	GNG4	0	0	0	0.0972222	0.275862	0.186542	0.236111	0.103448	0.16978	0	0	0			6.50506	4.32528	4.9779	4.9779
chr1q42	LYST	0	0	0	0.0917431	0.386667	0.239205	0.183486	0.08	0.131743	0	0.0133333	0.00666666		loss	2.37339	3.46414	-1.15436	2.37339
chr1q42	NID1	0	0	0	0.0972222	0.275862	0.186542	0.236111	0.103448	0.16978	0	0	0			4.48067	4.36761	2.59251	4.36761
chr1q42	GPR137B	0	0.0344828	0.0172414	0.0972222	0.241379	0.169301	0.236111	0.103448	0.16978	0	0	0			-4.40976	-5.90056	-6.20632	-5.90056
chr1q42	EDARADD	0	0.0344828	0.0172414	0.0985915	0.241379	0.169985	0.225352	0.103448	0.1644	0	0	0			1.45976	-4.14734	-1.27195	-1.27195
chr1q43	LGALS8	0	0.0344828	0.0172414	0.0972222	0.241379	0.169301	0.236111	0.103448	0.16978	0	0	0			1.43047	1.02194	0.893493	1.02194
chr1q43	HEATR1	0	0.0344828	0.0172414	0.0972222	0.241379	0.169301	0.236111	0.103448	0.16978	0	0	0			-0.544521	0.0923317	-0.107815	-0.107815
chr1q43	ACTN2	0	0.0344828	0.0172414	0.0972222	0.241379	0.169301	0.236111	0.103448	0.16978	0	0	0			-1.55768	1.05936	2.79476	1.05936
chr1q43	MTR	0	0.0344828	0.0172414	0.0972222	0.241379	0.169301	0.236111	0.103448	0.16978	0	0	0			4.11372	3.84933	5.45838	4.11372
chr1q43	MT1HL1	0	0.0344828	0.0172414	0.0972222	0.241379	0.169301	0.236111	0.103448	0.16978	0	0	0			-2.76033	NA	2.15218	-0.304076
chr1q43	RYR2	0	0.0344828	0.0172414	0.101449	0.241379	0.171414	0.231884	0.0689655	0.150425	0	0	0			8.67419	7.40761	5.22251	7.40761
chr1q43	ZP4	0	0.015625	0.0078125	0.115385	0.3125	0.213942	0.163462	0.078125	0.120793	0	0.015625	0.0078125		loss	2.97944	-1.98504	1.54461	1.54461
chr1q43	CHRM3	0	0.0344828	0.0172414	0.0972222	0.241379	0.169301	0.222222	0.103448	0.162835	0	0	0			2.78359	1.49613	0.267638	1.49613
chr1q43	FMN2	0	0.0357143	0.0178571	0.0985915	0.25	0.174296	0.211268	0.107143	0.159205	0.0140845	0	0.00704225			-0.937008	-0.805528	-1.43821	-0.937008
chr1q43	GREM2	0	0.0344828	0.0172414	0.0972222	0.241379	0.169301	0.222222	0.103448	0.162835	0	0	0			2.64886	5.3003	2.30041	2.64886
chr1q43	RGS7	0	0.0131579	0.00657895	0.12844	0.368421	0.248431	0.165138	0.0789474	0.122042	0	0.0131579	0.00657895		loss	-0.178171	0.5798	2.48344	0.5798
chr1q43	FH	0	0.0131579	0.00657895	0.12844	0.368421	0.248431	0.165138	0.0789474	0.122042	0	0.0131579	0.00657895		loss	4.244	1.58241	2.6551	2.6551
chr1q43	KMO	0	0.027027	0.0135135	0.12963	0.364865	0.247247	0.166667	0.0540541	0.11036	0	0.0135135	0.00675675		loss	-2.98287	-4.5265	-3.60166	-3.60166
chr1q43	OPN3	0	0.0135135	0.00675675	0.12963	0.364865	0.247247	0.166667	0.0675676	0.117117	0	0.0135135	0.00675675		loss	-3.86849	-3.54703	-1.73058	-3.54703
chr1q43	CHML	0	0.0135135	0.00675675	0.12963	0.364865	0.247247	0.166667	0.0675676	0.117117	0	0.0135135	0.00675675		loss	4.6795	3.05998	3.17841	3.17841
chr1q43	WDR64	0	0.0135135	0.00675675	0.12963	0.364865	0.247247	0.166667	0.0675676	0.117117	0	0.0135135	0.00675675		loss	0.41196	3.94633	3.75584	3.75584
chr1q43	EXO1	0	0.0344828	0.0172414	0.111111	0.241379	0.176245	0.236111	0.103448	0.16978	0	0	0			0.20966	-1.19041	-0.506899	-0.506899
chr1q43	MAP1LC3C	0	0.0344828	0.0172414	0.111111	0.241379	0.176245	0.236111	0.103448	0.16978	0	0	0			-2.37853	-1.26396	1.08288	-1.26396
chr1q43	PLD5	0.0138889	0.0344828	0.0241858	0.111111	0.241379	0.176245	0.236111	0.103448	0.16978	0	0	0			3.32807	8.76636	3.40758	3.40758
chr1q43	CEP170	0	0.0344828	0.0172414	0.0985915	0.241379	0.169985	0.239437	0.103448	0.171442	0	0	0			-3.45251	-1.12352	-3.02172	-3.02172
chr1q43	SDCCAG8	0	0.0344828	0.0172414	0.0972222	0.241379	0.169301	0.236111	0.103448	0.16978	0	0	0			0.385697	0.709513	3.34102	0.709513
chr1q43	AKT3	0	0.0273973	0.0136986	0.174757	0.383562	0.279159	0.184466	0.0958904	0.140178	0	0	0		loss	5.78798	5.14637	4.34928	5.14637
chr1q44	ZBTB18	0	0.0344828	0.0172414	0.0972222	0.241379	0.169301	0.25	0.137931	0.193966	0	0	0			4.35594	NA	4.28713	4.32153
chr1q44	C1orf100	0	0.0135135	0.00675675	0.149533	0.310811	0.230172	0.186916	0.0945946	0.140755	0	0.027027	0.0135135		loss	1.42306	-1.40503	0.230193	0.230193
chr1q44	DESI2	0	0.0344828	0.0172414	0.0972222	0.206897	0.152059	0.25	0.137931	0.193966	0	0	0			4.48323	NA	2.9893	3.73627
chr1q44	COX20	0	0.0344828	0.0172414	0.0972222	0.206897	0.152059	0.25	0.103448	0.176724	0	0	0			6.77227	NA	7.79577	7.28402
chr1q44	HNRNPU	0	0.0344828	0.0172414	0.0972222	0.206897	0.152059	0.25	0.103448	0.176724	0	0	0			0.661983	0.739947	4.06236	0.739947
chr1q44	EFCAB2	0	0.0344828	0.0172414	0.0972222	0.206897	0.152059	0.25	0.103448	0.176724	0	0	0			6.78587	3.66517	4.21006	4.21006
chr1q44	KIF26B	0	0.0344828	0.0172414	0.0972222	0.206897	0.152059	0.25	0.137931	0.193966	0	0	0			-4.19453	-3.9172	-4.44891	-4.19453
chr1q44	SMYD3	0.00952381	0	0.00476191	0.104762	0.342857	0.22381	0.2	0.0857143	0.142857	0	0.0142857	0.00714286		loss	-2.11015	-3.03719	-2.98582	-2.98582
chr1q44	TFB2M	0	0	0	0.0972222	0.214286	0.155754	0.25	0.142857	0.196429	0	0	0			-1.8888	-3.17627	-2.81236	-2.81236
chr1q44	CNST	0	0	0	0.0985915	0.206897	0.152744	0.253521	0.137931	0.195726	0	0	0			9.54882	9.45114	6.15595	9.45114
chr1q44	SCCPDH	0	0	0	0.111111	0.178571	0.144841	0.25	0.142857	0.196429	0	0	0			3.92879	0.92946	2.38506	2.38506
chr1q44	AHCTF1	0	0	0	0.112676	0.172414	0.142545	0.253521	0.137931	0.195726	0	0	0			3.06997	3.8285	3.44274	3.44274
chr1q44	ZNF695	0	0	0	0.138889	0.172414	0.155651	0.25	0.137931	0.193966	0	0	0			NA	-3.13773	-1.76577	-2.45175
chr1q44	ZNF670	0	0	0	0.140845	0.172414	0.156629	0.253521	0.137931	0.195726	0	0	0			1.58532	3.73637	4.08432	3.73637
chr1q44	ZNF669	0	0	0	0.152778	0.172414	0.162596	0.25	0.137931	0.193966	0	0	0			-2.03296	1.89797	1.95774	1.89797
chr1q44	C1orf229	0	0	0	0.152778	0.172414	0.162596	0.25	0.137931	0.193966	0	0	0			NA	6.95537	1.22726	4.09131
chr1q44	ZNF124	0	0	0	0.152778	0.172414	0.162596	0.25	0.137931	0.193966	0	0	0			-3.50038	-3.07042	-3.27819	-3.27819
chr1q44	ZNF496	0	0	0	0.152778	0.137931	0.145354	0.25	0.137931	0.193966	0	0	0			-0.486108	-1.0038	-0.314632	-0.486108
chr1q44	NLRP3	0	0	0	0.152778	0.137931	0.145354	0.25	0.137931	0.193966	0	0	0			0.583806	-2.74322	-2.53585	-2.53585
chr1q44	OR2B11	0	0	0	0.152778	0.137931	0.145354	0.25	0.137931	0.193966	0	0	0			NA	-1.01269	-1.76355	-1.38812
chr1q44	OR2W5	0	0	0	0.152778	0.137931	0.145354	0.236111	0.137931	0.187021	0	0	0			NA	-1	-0.809387	-0.904694
chr1q44	GCSAML	0	0	0	0.152778	0.137931	0.145354	0.236111	0.137931	0.187021	0	0	0			-0.984368	NA	0.461525	-0.261421
chr1q44	OR2C3	0	0	0	0.152778	0.137931	0.145354	0.236111	0.137931	0.187021	0	0	0			-0.0294926	-2.34159	-2.29352	-2.29352
chr1q44	OR2G2	0	0	0	0.152778	0.137931	0.145354	0.236111	0.137931	0.187021	0	0	0			NA	-0.832073	-0.343748	-0.587911
chr1q44	OR2G3	0	0	0	0.152778	0.137931	0.145354	0.236111	0.137931	0.187021	0	0	0			NA	1	1.08518	1.04259
chr1q44	OR13G1	0	0	0	0.152778	0.137931	0.145354	0.236111	0.137931	0.187021	0	0	0			NA	-0.616997	-2.09779	-1.35739
chr1q44	OR6F1	0	0	0	0.152778	0.137931	0.145354	0.236111	0.137931	0.187021	0	0	0			NA	1	-2.16485	-0.582427
chr1q44	OR1C1	0	0	0	0.152778	0.172414	0.162596	0.236111	0.137931	0.187021	0	0	0			-1.88148	-0.359214	-1.9981	-1.88148
chr1q44	OR14A16	0	0	0	0.152778	0.172414	0.162596	0.236111	0.137931	0.187021	0	0	0			NA	NA	-1.60297	-1.60297
chr1q44	OR11L1	0	0	0	0.153846	0.324324	0.239085	0.173077	0.0810811	0.127079	0	0.0135135	0.00675675		loss	NA	-1.39546	-1.1706	-1.28303
chr1q44	TRIM58	0	0	0	0.153846	0.337838	0.245842	0.173077	0.0810811	0.127079	0	0.0135135	0.00675675		loss	-1.74388	-3.21399	-1.74607	-1.74607
chr1q44	OR2W3	0	0	0	0.152778	0.172414	0.162596	0.236111	0.137931	0.187021	0	0	0			NA	-1.99061	-2.96328	-2.47694
chr1q44	OR2T8	0	0	0	0.152778	0.172414	0.162596	0.236111	0.137931	0.187021	0	0	0			NA	-1.41646	-2.18857	-1.80252
chr1q44	OR2L13	0	0	0	0.163462	0.337838	0.25065	0.173077	0.0810811	0.127079	0	0.0135135	0.00675675		loss	-1.72114	-1.3925	-1.85374	-1.72114
chr1q44	OR2L8	0	0	0	0.163462	0.337838	0.25065	0.173077	0.0810811	0.127079	0	0.0135135	0.00675675		loss	NA	-0.342876	-1.69934	-1.02111
chr1q44	OR2AK2	0	0	0	0.153846	0.337838	0.245842	0.173077	0.0810811	0.127079	0	0.0135135	0.00675675		loss	NA	-0.509938	-1.80837	-1.15916
chr1q44	OR2L5	0	0	0	0.152778	0.172414	0.162596	0.236111	0.137931	0.187021	0	0	0			NA	NA	-1.93122	-1.93122
chr1q44	OR2L2	0	0	0	0.152778	0.172414	0.162596	0.236111	0.137931	0.187021	0	0	0			-0.650806	-1.06412	-1.54736	-1.06412
chr1q44	OR2L3	0	0	0	0.152778	0.172414	0.162596	0.236111	0.137931	0.187021	0	0	0			NA	1.41624	-1.93664	-0.2602
chr1q44	OR2M5	0	0	0	0.152778	0.172414	0.162596	0.236111	0.137931	0.187021	0	0	0			NA	NA	-1.83368	-1.83368
chr1q44	OR2M2	0	0	0	0.152778	0.172414	0.162596	0.236111	0.137931	0.187021	0	0	0			NA	-0.490768	-2.09619	-1.29348
chr1q44	OR2M3	0	0	0	0.152778	0.172414	0.162596	0.236111	0.137931	0.187021	0	0	0			NA	-1	-2.29894	-1.64947
chr1q44	OR2M4	0	0	0	0.152778	0.172414	0.162596	0.236111	0.137931	0.187021	0	0	0			-0.728332	1	-2.14614	-0.728332
chr1q44	OR2T33	0	0	0	0.152778	0.172414	0.162596	0.236111	0.137931	0.187021	0	0	0			NA	-0.863293	-1.78872	-1.32601
chr1q44	OR2T12	0	0	0	0.152778	0.172414	0.162596	0.236111	0.137931	0.187021	0	0	0			NA	1	-1.51135	-0.255673
chr1q44	OR2M7	0	0	0	0.152778	0.172414	0.162596	0.236111	0.137931	0.187021	0	0	0			NA	NA	-1.57016	-1.57016
chr1q44	OR14C36	0	0	0	0.152778	0.172414	0.162596	0.236111	0.137931	0.187021	0	0	0			NA	-1	-1.11655	-1.05828
chr1q44	OR2T4	0	0	0	0.152778	0.172414	0.162596	0.236111	0.137931	0.187021	0	0	0			NA	1	-1.24864	-0.124318
chr1q44	OR2T6	0	0	0	0.152778	0.137931	0.145354	0.236111	0.137931	0.187021	0	0	0			NA	-1	-1.46486	-1.23243
chr1q44	OR2T1	0	0	0	0.152778	0.137931	0.145354	0.236111	0.137931	0.187021	0	0	0			NA	-1	-0.713983	-0.856992
chr1q44	OR2T2	0	0	0	0.152778	0.137931	0.145354	0.222222	0.137931	0.180077	0	0	0			NA	-1.12883	-1.33487	-1.23185
chr1q44	OR2T3	0	0	0	0.152778	0.137931	0.145354	0.222222	0.137931	0.180077	0	0	0			NA	0.40081	-0.472887	-0.0360384
chr1q44	OR2T5	0	0	0	0.125	0.137931	0.131466	0.222222	0.103448	0.162835	0	0	0			NA	1	NA	1
chr1q44	OR2G6	0	0	0	0.125	0.0689655	0.0969828	0.222222	0.103448	0.162835	0	0	0			NA	-1	-1.2551	-1.12755
chr1q44	OR2T29	0	0	0	0.138889	0.0740741	0.106481	0.222222	0.148148	0.185185	0	0	0			NA	NA	NA	NA
chr1q44	OR2T34	0	0	0	0.152778	0.172414	0.162596	0.222222	0.103448	0.162835	0	0	0			NA	-0.455971	NA	-0.455971
chr1q44	OR2T10	0	0	0	0.152778	0.172414	0.162596	0.222222	0.103448	0.162835	0	0	0			NA	-0.787396	0.24387	-0.271763
chr1q44	OR2T11	0	0	0	0.152778	0.172414	0.162596	0.222222	0.103448	0.162835	0	0	0			NA	NA	0.470403	0.470403
chr1q44	OR2T35	0	0.0344828	0.0172414	0.15493	0.103448	0.129189	0.225352	0.103448	0.1644	0	0	0			NA	NA	NA	NA
chr1q44	OR2T27	0	0	0	0.166667	0.103448	0.135057	0.236111	0.103448	0.16978	0	0	0			NA	NA	-0.828234	-0.828234
chr1q44	OR14I1	0	0	0	0.152778	0.103448	0.128113	0.222222	0.103448	0.162835	0	0	0			NA	-1.10504	-0.993377	-1.04921
chr1q44	LYPD8	0	0	0	0.152778	0.103448	0.128113	0.208333	0.103448	0.155891	0	0	0			-1.88059	NA	-0.792636	-1.33661
chr1q44	SH3BP5L	0	0	0	0.149533	0.342466	0.245999	0.186916	0.0958904	0.141403	0	0.0136986	0.00684931		loss	0.501893	1.69727	1.23483	1.23483
chr1q44	ZNF672	0	0	0	0.149533	0.342466	0.245999	0.186916	0.0958904	0.141403	0	0.0136986	0.00684931		loss	4.50237	3.02151	3.66441	3.66441
chr1q44	ZNF692	0	0	0	0.149533	0.342466	0.245999	0.186916	0.0958904	0.141403	0	0.0136986	0.00684931		loss	1.40827	1.62354	1.87572	1.62354
chr1q44	PGBD2	0	0	0	0.152778	0.103448	0.128113	0.208333	0.103448	0.155891	0	0	0			-0.737309	-1.24551	1.25369	-0.737309
chr2p25	FAM110C	0.0183486	0.0133333	0.015841	0.422018	0.32	0.371009	0.0275229	0.0933333	0.0604281	0	0	0			-0.871922	-1.24166	1.15459	-0.871922
chr2p25	SH3YL1	0.0192308	0.0135135	0.0163721	0.451923	0.27027	0.361097	0.0192308	0.0945946	0.0569127	0	0	0			-2.59919	-1.06621	-1.65729	-1.65729
chr2p25	ACP1	0.0192308	0.0135135	0.0163721	0.451923	0.27027	0.361097	0.0192308	0.0945946	0.0569127	0	0	0			-3.27402	-3.17916	-0.923059	-3.17916
chr2p25	TMEM18	0.00961538	0	0.00480769	0.451923	0.283784	0.367853	0.0192308	0.0945946	0.0569127	0	0	0			-1.15949	0.0587052	1.4558	0.0587052
chr2p25	SNTG2	0.010101	0	0.00505051	0.454545	0.291667	0.373106	0.020202	0.0972222	0.0587121	0.010101	0.0138889	0.011995			-1.59289	-0.172995	-1.19817	-1.19817
chr2p25	TPO	0.00943396	0	0.00471698	0.443396	0.310811	0.377104	0.0283019	0.0945946	0.0614482	0.00943396	0	0.00471698			0.56961	-0.471828	-1.21076	-0.471828
chr2p25	PXDN	0.00925926	0	0.00462963	0.444444	0.324324	0.384384	0.037037	0.0945946	0.0658158	0.00925926	0	0.00462963			-2.28511	-3.0823	-2.19414	-2.28511
chr2p25	MYT1L	0.00925926	0	0.00462963	0.462963	0.337838	0.4004	0.037037	0.0945946	0.0658158	0.00925926	0	0.00462963			-1.67246	-2.78635	-0.791317	-1.67246
chr2p25	TRAPPC12	0	0	0	0.444444	0.214286	0.329365	0.0555556	0.107143	0.0813492	0.0138889	0	0.00694444			-1.05311	NA	-0.135663	-0.594389
chr2p25	ADI1	0	0	0	0.423077	0.27027	0.346674	0.0384615	0.0945946	0.0665281	0.00961538	0	0.00480769			-1.11928	-0.348798	0.414695	-0.348798
chr2p25	RNASEH1	0	0	0	0.423077	0.27027	0.346674	0.0384615	0.0945946	0.0665281	0.00961538	0	0.00480769			-0.614396	-1.56261	0.341035	-0.614396
chr2p25	RPS7	0	0	0	0.403846	0.27027	0.337058	0.0384615	0.0945946	0.0665281	0.00961538	0	0.00480769			-0.201879	-3.35021	-0.0923041	-0.201879
chr2p25	COLEC11	0	0	0	0.413462	0.27027	0.341866	0.0384615	0.0945946	0.0665281	0.00961538	0	0.00480769			0.119373	-1.6864	-1.56155	-1.56155
chr2p25	ALLC	0	0	0	0.461538	0.283784	0.372661	0.0384615	0.0945946	0.0665281	0.00961538	0	0.00480769			-1.21118	-1.42462	-1.44061	-1.42462
chr2p25	SOX11	0	0	0	0.451923	0.243243	0.347583	0.0288462	0.0945946	0.0617204	0.00961538	0	0.00480769	loss		-6.70353	-6.29943	-3.74403	-6.29943
chr2p25	CMPK2	0	0	0	0.432692	0.243243	0.337968	0.0288462	0.0945946	0.0617204	0.00961538	0.0135135	0.0115644	loss		1.58985	1.64142	-1.17459	1.58985
chr2p25	RSAD2	0	0	0	0.432692	0.243243	0.337968	0.0288462	0.0945946	0.0617204	0.00961538	0.0135135	0.0115644	loss		2.06077	1.72313	-0.528551	1.72313
chr2p25	RNF144A	0	0	0	0.458716	0.266667	0.362691	0.0275229	0.106667	0.0670948	0.00917431	0.0133333	0.0112538	loss		-7.66869	-4.50099	-5.92073	-5.92073
chr2p25	ID2	0	0	0	0.442308	0.27027	0.356289	0.0384615	0.108108	0.0732848	0.00961538	0	0.00480769			3.77015	-0.40947	-0.592371	-0.40947
chr2p25	KIDINS220	0	0	0	0.46729	0.260274	0.363782	0.0280374	0.123288	0.0756625	0.00934579	0	0.0046729	loss		-5.33527	0.0155124	-0.669874	-0.669874
chr2p25	MBOAT2	0	0	0	0.46729	0.273973	0.370631	0.0280374	0.123288	0.0756625	0.00934579	0	0.0046729	loss		-5.04124	-4.1734	-1.82512	-4.1734
chr2p25	ASAP2	0	0	0	0.462963	0.310811	0.386887	0.037037	0.121622	0.0793293	0.00925926	0	0.00462963			-2.18883	-0.260382	0.425838	-0.260382
chr2p25	ITGB1BP1	0	0	0	0.442308	0.27027	0.356289	0.0384615	0.108108	0.0732848	0.00961538	0	0.00480769			-0.691417	-3.62978	-0.849844	-0.849844
chr2p25	CPSF3	0	0	0	0.461538	0.310811	0.386175	0.0384615	0.121622	0.0800416	0.00961538	0	0.00480769			0.2979	-3.51063	-0.804371	-0.804371
chr2p25	IAH1	0	0	0	0.461538	0.310811	0.386175	0.0384615	0.121622	0.0800416	0.00961538	0	0.00480769			-4.96695	-1.1998	1.63244	-1.1998
chr2p25	ADAM17	0	0	0	0.461538	0.310811	0.386175	0.0384615	0.121622	0.0800416	0.00961538	0	0.00480769			-7.85194	-3.34916	-4.80012	-4.80012
chr2p25	YWHAQ	0	0	0	0.461538	0.297297	0.379418	0.0384615	0.121622	0.0800416	0.00961538	0	0.00480769			-0.231821	-1.51097	-0.294565	-0.294565
chr2p25	TAF1B	0.0384615	0.0135135	0.0259875	0.413462	0.283784	0.348623	0.0288462	0.108108	0.0684771	0.00961538	0	0.00480769			-2.46272	-1.56685	-2.91918	-2.46272
chr2p25	GRHL1	0	0	0	0.446602	0.283784	0.365193	0.0291262	0.108108	0.0686172	0.00970874	0	0.00485437			-2.95774	0.714933	-0.355004	-0.355004
chr2p25	KLF11	0	0	0	0.442308	0.27027	0.356289	0.0480769	0.108108	0.0780925	0.00961538	0	0.00480769			3.2133	3.52816	3.69744	3.52816
chr2p25	CYS1	0	0	0	0.451923	0.283784	0.367853	0.0480769	0.108108	0.0780925	0.00961538	0	0.00480769			-4.6194	-3.60713	-1.4844	-3.60713
chr2p25	RRM2	0	0	0	0.451923	0.283784	0.367853	0.0480769	0.108108	0.0780925	0.00961538	0	0.00480769			2.78631	-2.74195	-0.758067	-0.758067
chr2p25	HPCAL1	0	0	0	0.451923	0.310811	0.381367	0.0480769	0.135135	0.091606	0.00961538	0	0.00480769			-5.11729	-7.57352	-2.73185	-5.11729
chr2p25	ODC1	0	0	0	0.451923	0.310811	0.381367	0.0480769	0.135135	0.091606	0.00961538	0	0.00480769			-2.49445	-2.73752	-0.629748	-2.49445
chr2p25	NOL10	0	0	0	0.471154	0.297297	0.384226	0.0384615	0.135135	0.0867983	0.00961538	0	0.00480769			-2.98752	-4.01657	-1.9629	-2.98752
chr2p25	ATP6V1C2	0	0	0	0.451923	0.273973	0.362948	0.0384615	0.0958904	0.067176	0.00961538	0	0.00480769			-1.26628	-5.02602	-1.47027	-1.47027
chr2p25	PDIA6	0	0	0	0.451923	0.27027	0.361097	0.0384615	0.0945946	0.0665281	0.00961538	0	0.00480769			-1.99776	-5.40868	-2.34652	-2.34652
chr2p25	KCNF1	0	0	0	0.444444	0.172414	0.308429	0.0555556	0.103448	0.0795019	0.0138889	0	0.00694444	loss		-2.07398	-5.16941	-3.60764	-3.60764
chr2p25	C2orf50	0	0	0	0.442308	0.256757	0.349532	0.0384615	0.0945946	0.0665281	0.00961538	0	0.00480769	loss		-0.670302	-1.81775	-0.474267	-0.670302
chr2p25	ROCK2	0	0	0	0.5	0.297297	0.398649	0.0196078	0.0945946	0.0571012	0.00980392	0	0.00490196	loss		1.00594	3.5288	4.43688	3.5288
chr2p25	E2F6	0	0	0	0.475728	0.283784	0.379756	0.0291262	0.0945946	0.0618604	0	0	0	loss		-4.62289	-4.44921	-0.62392	-4.44921
chr2p25	GREB1	0	0	0	0.481481	0.306667	0.394074	0.037037	0.106667	0.0718519	0	0	0			-0.317639	-4.19416	-2.05792	-2.05792
chr2p25	NTSR2	0	0	0	0.461538	0.27027	0.365904	0.0384615	0.0945946	0.0665281	0	0	0	loss		1.53048	-1.03417	-1.66264	-1.03417
chr2p25	LPIN1	0	0	0	0.490566	0.306667	0.398616	0.0188679	0.106667	0.0627673	0	0	0	loss		-3.91766	0.524927	-1.60891	-1.60891
chr2p24	TRIB2	0	0	0	0.471154	0.256757	0.363955	0.0192308	0.0945946	0.0569127	0	0	0	loss		-1.88131	-3.52534	-5.25608	-3.52534
chr2p24	NBAS	0	0	0	0.486239	0.293333	0.389786	0.0183486	0.106667	0.0625076	0	0	0	loss		-3.13179	-3.86935	-1.40484	-3.13179
chr2p24	DDX1	0	0	0	0.46729	0.253333	0.360312	0.0186916	0.106667	0.0626791	0	0	0	loss		-3.38941	-2.77319	-0.761478	-2.77319
chr2p24	MYCN	0	0	0	0.472222	0.172414	0.322318	0.0416667	0.103448	0.0725575	0	0	0	loss		-2.44874	-2.12324	-1.26949	-2.12324
chr2p24	FAM49A	0	0	0	0.471154	0.283784	0.377469	0.0192308	0.0945946	0.0569127	0	0	0	loss		2.66203	0.724347	4.5547	2.66203
chr2p24	RAD51AP2	0	0	0	0.490741	0.27027	0.380506	0.0185185	0.108108	0.0633133	0	0	0	loss		NA	-1.78921	-2.97988	-2.38454
chr2p24	VSNL1	0	0	0	0.490741	0.283784	0.387262	0.0185185	0.108108	0.0633133	0	0	0	loss		-0.848667	-1.74684	-2.7105	-1.74684
chr2p24	SMC6	0	0	0	0.480769	0.27027	0.37552	0.0192308	0.0945946	0.0569127	0	0	0	loss		-0.64369	0.00133228	-0.241001	-0.241001
chr2p24	GEN1	0	0	0	0.480769	0.27027	0.37552	0.0192308	0.0945946	0.0569127	0	0	0	loss		-2.9534	-3.1231	-2.59549	-2.9534
chr2p24	MSGN1	0	0	0	0.486111	0.172414	0.329262	0.0277778	0.103448	0.065613	0	0	0	loss		NA	1.08863	0.776336	0.932481
chr2p24	KCNS3	0	0	0	0.471154	0.27027	0.370712	0.0192308	0.0945946	0.0569127	0	0	0	loss		2.45602	2.47755	1.33101	2.45602
chr2p24	RDH14	0	0	0	0.476636	0.253333	0.364984	0.0186916	0.0933333	0.0560125	0	0	0	loss		NA	1.32799	4.38716	2.85758
chr2p24	NT5C1B	0	0	0	0.476636	0.253333	0.364984	0.0186916	0.0933333	0.0560125	0	0	0	loss		-0.842659	1.63799	1.32507	1.32507
chr2p24	OSR1	0.00961538	0	0.00480769	0.461538	0.27027	0.365904	0.0192308	0.0945946	0.0569127	0	0	0	loss		-0.330548	3.23534	3.66659	3.23534
chr2p24	TTC32	0	0	0	0.495413	0.253333	0.374373	0.0183486	0.106667	0.0625076	0	0	0	loss		6.85946	3.95264	3.95882	3.95882
chr2p24	WDR35	0	0	0	0.5	0.28	0.39	0.0185185	0.106667	0.0625926	0	0	0	loss		-3.30184	-1.21917	-1.56634	-1.56634
chr2p24	MATN3	0	0	0	0.471154	0.27027	0.370712	0.0192308	0.0945946	0.0569127	0	0	0	loss		-1.57417	-5.57359	-4.22879	-4.22879
chr2p24	LAPTM4A	0	0	0	0.471154	0.27027	0.370712	0.0192308	0.0945946	0.0569127	0	0	0	loss		-6.0817	-3.33468	-1.51336	-3.33468
chr2p24	SDC1	0	0	0	0.481481	0.253333	0.367407	0.0277778	0.106667	0.0672222	0	0	0	loss		0.606052	-0.11326	-0.552289	-0.11326
chr2p24	PUM2	0	0	0	0.495413	0.28	0.387706	0.0183486	0.106667	0.0625076	0	0	0	loss		4.17888	3.69746	5.18607	4.17888
chr2p24	RHOB	0	0	0	0.486111	0.172414	0.329262	0.0416667	0.103448	0.0725575	0	0	0	loss		9.14879	6.4422	6.32319	6.4422
chr2p24	HS1BP3	0	0	0	0.451923	0.256757	0.35434	0.0288462	0.0945946	0.0617204	0	0	0	loss		4.212	8.39805	4.18395	4.212
chr2p24	GDF7	0	0	0	0.456311	0.256757	0.356534	0.0291262	0.0945946	0.0618604	0	0	0	loss		NA	0.857729	-0.445483	0.206123
chr2p24	APOB	0	0	0	0.480769	0.256757	0.368763	0.0192308	0.0945946	0.0569127	0	0	0	loss		-1.01215	3.67185	-0.228357	-0.228357
chr2p24	KLHL29	0	0	0	0.490385	0.27027	0.380327	0.0288462	0.0945946	0.0617204	0	0	0	loss		-1.63095	0.206938	0.89767	0.206938
chr2p24	ATAD2B	0	0	0	0.490385	0.283784	0.387084	0.0192308	0.0945946	0.0569127	0	0	0	loss		-5.24356	-2.13468	-1.61331	-2.13468
chr2p23	UBXN2A	0	0	0	0.490385	0.283784	0.387084	0.0192308	0.0945946	0.0569127	0	0	0	loss		-1.0021	-3.3664	-1.59253	-1.59253
chr2p23	MFSD2B	0	0	0	0.490385	0.283784	0.387084	0.0288462	0.0945946	0.0617204	0	0	0	loss		NA	-3.73792	1.16201	-1.28795
chr2p23	FKBP1B	0	0	0	0.490385	0.283784	0.387084	0.0288462	0.0945946	0.0617204	0	0	0	loss		-4.81158	-6.33961	-2.42902	-4.81158
chr2p23	FAM228B	0	0	0	0.486111	0.172414	0.329262	0.0277778	0.103448	0.065613	0	0	0	loss		4.45709	NA	2.41129	3.43419
chr2p23	TP53I3	0	0	0	0.490385	0.283784	0.387084	0.0288462	0.0945946	0.0617204	0	0	0	loss		-5.4635	-6.81164	-2.40541	-5.4635
chr2p23	PFN4	0	0	0	0.490385	0.283784	0.387084	0.0192308	0.0945946	0.0569127	0	0	0	loss		-0.829123	1.27007	1.87897	1.27007
chr2p23	FAM228A	0	0	0	0.486111	0.172414	0.329262	0.0277778	0.103448	0.065613	0	0	0	loss		0.313206	NA	1.38494	0.849072
chr2p23	ITSN2	0	0	0	0.504854	0.283784	0.394319	0.0194175	0.0945946	0.057006	0	0	0	loss		4.80678	2.62683	1.7585	2.62683
chr2p23	NCOA1	0	0	0	0.514019	0.293333	0.403676	0.0186916	0.0933333	0.0560125	0	0	0	loss		-2.10269	0.47092	-0.282337	-0.282337
chr2p23	PTRHD1	0	0	0	0.486111	0.172414	0.329262	0.0416667	0.103448	0.0725575	0	0	0	loss		-7.71989	NA	-3.51412	-5.61701
chr2p23	CENPO	0	0	0	0.509259	0.297297	0.403278	0.0277778	0.0945946	0.0611862	0	0	0	loss		-3.79009	-6.35194	-2.87346	-3.79009
chr2p23	ADCY3	0	0	0	0.523364	0.30137	0.412367	0.0186916	0.0958904	0.057291	0	0	0	loss		-1.24706	1.88452	0.361046	0.361046
chr2p23	DNAJC27	0	0	0	0.5	0.283784	0.391892	0.0185185	0.0945946	0.0565566	0	0	0	loss		-1.50914	0.897056	2.32707	0.897056
chr2p23	EFR3B	0	0	0	0.504854	0.287671	0.396263	0.0194175	0.0958904	0.0576539	0	0	0	loss		-2.43136	-0.0738057	-0.802131	-0.802131
chr2p23	POMC	0	0	0	0.480769	0.27027	0.37552	0.0288462	0.0945946	0.0617204	0	0	0	loss		1.54058	0.784168	0.949006	0.949006
chr2p23	DNMT3A	0	0	0	0.504587	0.266667	0.385627	0.0275229	0.0933333	0.0604281	0.00917431	0	0.00458716	loss		-4.27581	-2.60607	-0.406471	-2.60607
chr2p23	DTNB	0	0	0	0.527778	0.283784	0.405781	0.0185185	0.0945946	0.0565566	0	0	0	loss		-1.46639	-4.76603	-1.86212	-1.86212
chr2p23	ASXL2	0	0	0	0.504854	0.27027	0.387562	0.0194175	0.0945946	0.057006	0	0	0	loss		-3.03862	0.931873	-4.04408	-3.03862
chr2p23	KIF3C	0	0	0	0.490385	0.27027	0.380327	0.0288462	0.0945946	0.0617204	0	0	0	loss		-5.34328	-4.19084	-2.86161	-4.19084
chr2p23	RAB10	0	0	0	0.5	0.27027	0.385135	0.00980392	0.0945946	0.0521993	0	0	0	loss		-2.33513	-2.82582	-1.11659	-2.33513
chr2p23	HADHA	0	0	0	0.490385	0.260274	0.375329	0.00961538	0.0958904	0.0527529	0	0	0	loss		-4.33555	-3.55943	-0.76526	-3.55943
chr2p23	HADHB	0	0	0	0.490385	0.27027	0.380327	0.00961538	0.0945946	0.052105	0	0	0	loss		-3.66015	-1.98348	0.0964504	-1.98348
chr2p23	DRC1	0	0	0	0.5	0.172414	0.336207	0.0142857	0.103448	0.058867	0	0	0	loss		-2.12929	NA	-1.2442	-1.68674
chr2p23	OTOF	0.00961538	0	0.00480769	0.490385	0.27027	0.380327	0.0288462	0.0945946	0.0617204	0	0	0	loss		-1.86762	0.844425	1.68958	0.844425
chr2p23	CIB4	0	0	0	0.480392	0.27027	0.375331	0.00980392	0.0945946	0.0521993	0	0	0	loss		-1.00051	1.28724	3.90725	1.28724
chr2p23	KCNK3	0	0	0	0.490741	0.28	0.38537	0.0185185	0.0933333	0.0559259	0	0	0	loss		2.6897	7.4182	8.25732	7.4182
chr2p23	SLC35F6	0	0	0	0.486111	0.172414	0.329262	0.0277778	0.103448	0.065613	0	0	0	loss		-3.96081	NA	-3.62706	-3.79394
chr2p23	CENPA	0	0	0	0.490741	0.28	0.38537	0.0185185	0.0933333	0.0559259	0	0	0	loss		-0.0318503	-5.23559	-2.2474	-2.2474
chr2p23	DPYSL5	0	0	0	0.5	0.28	0.39	0.0185185	0.0933333	0.0559259	0	0	0	loss		2.32534	5.69061	3.29172	3.29172
chr2p23	MAPRE3	0	0	0	0.480769	0.27027	0.37552	0.0192308	0.0945946	0.0569127	0	0	0	loss		1.06008	2.29539	3.37006	2.29539
chr2p23	TMEM214	0	0	0	0.480769	0.256757	0.368763	0.0192308	0.0945946	0.0569127	0	0	0	loss		-5.61015	-4.29575	-4.81807	-4.81807
chr2p23	AGBL5	0	0	0	0.480769	0.27027	0.37552	0.0192308	0.0945946	0.0569127	0	0	0	loss		3.76981	3.87066	3.45727	3.76981
chr2p23	OST4	0	0	0	0.486111	0.172414	0.329262	0.0277778	0.103448	0.065613	0	0	0	loss		-2.87875	-5.18002	-0.212044	-2.87875
chr2p23	EMILIN1	0	0	0	0.485437	0.27027	0.377854	0.0194175	0.0945946	0.057006	0	0	0	loss		4.65023	2.1042	2.4313	2.4313
chr2p23	KHK	0	0	0	0.480769	0.27027	0.37552	0.0288462	0.0945946	0.0617204	0	0	0	loss		4.28483	9.52419	9.04648	9.04648
chr2p23	CGREF1	0	0	0	0.480769	0.27027	0.37552	0.0288462	0.0945946	0.0617204	0	0	0	loss		-1.14298	0.0285944	-0.235298	-0.235298
chr2p23	ABHD1	0	0	0	0.480769	0.27027	0.37552	0.0288462	0.0945946	0.0617204	0	0	0	loss		-0.742232	4.46319	3.40788	3.40788
chr2p23	PREB	0	0	0	0.480769	0.27027	0.37552	0.0288462	0.0945946	0.0617204	0	0	0	loss		0.588679	-0.216027	2.20095	0.588679
chr2p23	TCF23	0	0	0	0.486111	0.172414	0.329262	0.0277778	0.103448	0.065613	0	0	0	loss		NA	5.5179	5.3798	5.44885
chr2p23	SLC5A6	0	0	0	0.5	0.27027	0.385135	0.0192308	0.0945946	0.0569127	0	0	0	loss		-4.92094	-7.21392	-5.19637	-5.19637
chr2p23	ATRAID	0	0	0	0.486111	0.172414	0.329262	0.0277778	0.103448	0.065613	0	0	0	loss		-2.32003	NA	0.365269	-0.977382
chr2p23	CAD	0	0	0	0.5	0.27027	0.385135	0.0192308	0.0945946	0.0569127	0	0	0	loss		-1.84264	-1.51068	-3.30537	-1.84264
chr2p23	SLC30A3	0	0	0	0.480769	0.27027	0.37552	0.0192308	0.0945946	0.0569127	0	0	0	loss		-1.86339	0.138409	-1.1056	-1.1056
chr2p23	DNAJC5G	0	0	0	0.480769	0.27027	0.37552	0.0192308	0.0945946	0.0569127	0	0	0	loss		-0.955341	2.46347	-1.02823	-0.955341
chr2p23	TRIM54	0	0	0	0.480769	0.27027	0.37552	0.0192308	0.0945946	0.0569127	0	0	0	loss		-2.2456	-1.45057	-0.199385	-1.45057
chr2p23	UCN	0	0	0	0.486111	0.172414	0.329262	0.0277778	0.103448	0.065613	0	0	0	loss		3.38052	2.74007	1.50845	2.74007
chr2p23	MPV17	0	0	0	0.480769	0.27027	0.37552	0.0192308	0.0945946	0.0569127	0	0	0	loss		-2.0743	-1.96587	-0.515983	-1.96587
chr2p23	GTF3C2	0	0	0	0.490385	0.27027	0.380327	0.0192308	0.0945946	0.0569127	0	0	0	loss		-5.81324	-4.0492	-3.86732	-4.0492
chr2p23	EIF2B4	0	0	0	0.480769	0.27027	0.37552	0.0192308	0.0945946	0.0569127	0	0	0	loss		-1.03349	-1.25004	0.266534	-1.03349
chr2p23	SNX17	0	0	0	0.486111	0.172414	0.329262	0.0277778	0.103448	0.065613	0	0	0	loss		-4.9781	-3.90383	-1.27555	-3.90383
chr2p23	ZNF513	0	0	0	0.480769	0.27027	0.37552	0.0192308	0.0945946	0.0569127	0	0	0	loss		-2.6466	-1.18163	-1.00982	-1.18163
chr2p23	PPM1G	0	0	0	0.490385	0.27027	0.380327	0.0192308	0.0945946	0.0569127	0	0	0	loss		-1.01066	-4.23302	-1.54272	-1.54272
chr2p23	NRBP1	0	0	0	0.490385	0.27027	0.380327	0.0192308	0.0945946	0.0569127	0	0	0	loss		-6.15415	-10.0332	-3.76576	-6.15415
chr2p23	KRTCAP3	0	0	0	0.486111	0.172414	0.329262	0.0277778	0.103448	0.065613	0	0	0	loss		-1.91598	0.211107	-0.759708	-0.759708
chr2p23	IFT172	0	0	0	0.490385	0.27027	0.380327	0.0192308	0.0945946	0.0569127	0	0	0	loss		-3.73823	-1.59879	-3.14335	-3.14335
chr2p23	FNDC4	0	0	0	0.486111	0.172414	0.329262	0.0277778	0.103448	0.065613	0	0	0	loss		-5.78625	-8.02613	-5.51384	-5.78625
chr2p23	GCKR	0	0	0	0.490385	0.27027	0.380327	0.0192308	0.0945946	0.0569127	0	0	0	loss		0.310766	-3.23505	-1.94621	-1.94621
chr2p23	C2orf16	0	0	0	0.490385	0.27027	0.380327	0.0192308	0.0945946	0.0569127	0	0	0	loss		-1.36058	0.649466	1.85418	0.649466
chr2p23	ZNF512	0	0	0	0.490385	0.27027	0.380327	0.0192308	0.0945946	0.0569127	0	0	0	loss		-0.442758	1.57722	1.20385	1.20385
chr2p23	CCDC121	0	0	0	0.480769	0.27027	0.37552	0.0192308	0.0945946	0.0569127	0	0	0	loss		-1.02733	2.42234	4.75002	2.42234
chr2p23	GPN1	0	0	0	0.480769	0.27027	0.37552	0.0192308	0.0945946	0.0569127	0	0	0	loss		-6.26213	-8.04827	-2.74179	-6.26213
chr2p23	SUPT7L	0	0	0	0.480769	0.27027	0.37552	0.0192308	0.0945946	0.0569127	0	0	0	loss		-1.6035	-1.37601	-1.47144	-1.47144
chr2p23	SLC4A1AP	0	0	0	0.485437	0.27027	0.377854	0.0194175	0.0945946	0.057006	0	0	0	loss		-6.33545	-3.00607	-1.61876	-3.00607
chr2p23	MRPL33	0	0	0	0.480769	0.27027	0.37552	0.0192308	0.0945946	0.0569127	0	0	0	loss		-0.23941	-1.3085	1.49115	-0.23941
chr2p23	RBKS	0	0	0	0.495146	0.27027	0.382708	0.00970874	0.0945946	0.0521517	0	0	0	loss		-3.76017	-5.35087	-5.61629	-5.35087
chr2p23	FOSL2	0	0	0	0.513761	0.253333	0.383547	0.0183486	0.106667	0.0625076	0	0	0	loss		-1.78997	-2.0528	-4.62256	-2.0528
chr2p23	PLB1	0	0	0	0.53211	0.27027	0.40119	0.0183486	0.0945946	0.0564716	0	0	0	loss		-2.22688	-1.67563	-0.0410568	-1.67563
chr2p23	PPP1CB	0	0	0	0.5	0.256757	0.378378	0.00961538	0.0945946	0.052105	0	0	0	loss		4.78345	4.22326	5.17737	4.78345
chr2p23	SPDYA	0	0	0	0.5	0.256757	0.378378	0.00961538	0.0945946	0.052105	0	0	0	loss		-0.149694	0.952266	-0.61269	-0.149694
chr2p23	TRMT61B	0	0	0	0.5	0.256757	0.378378	0.00961538	0.0945946	0.052105	0	0	0	loss		-2.49238	-1.58236	-1.04736	-1.58236
chr2p23	WDR43	0	0	0	0.480769	0.256757	0.368763	0.00961538	0.0945946	0.052105	0	0	0	loss		-4.69883	-6.13696	-2.42503	-4.69883
chr2p23	CLIP4	0	0	0	0.480769	0.243243	0.362006	0.00961538	0.0945946	0.052105	0	0	0	loss		-5.5028	-4.70882	-5.47444	-5.47444
chr2p23	ALK	0	0	0	0.490385	0.283784	0.387084	0.0192308	0.0945946	0.0569127	0	0	0	loss		-2.88597	-1.96424	-2.33861	-2.33861
chr2p23	YPEL5	0	0	0	0.480769	0.243243	0.362006	0.00961538	0.0945946	0.052105	0	0	0	loss		-2.97924	-2.24292	0.29956	-2.24292
chr2p23	LBH	0	0	0	0.480769	0.243243	0.362006	0.00961538	0.0945946	0.052105	0	0	0	loss		-0.123243	-3.56299	-2.28342	-2.28342
chr2p23	LCLAT1	0	0	0	0.490385	0.27027	0.380327	0.00961538	0.0945946	0.052105	0	0	0	loss		-0.660004	-0.221004	-0.0331037	-0.221004
chr2p23	CAPN13	0	0	0	0.490385	0.243243	0.366814	0.00961538	0.0945946	0.052105	0	0	0	loss		-2.90356	-1.27876	-2.29461	-2.29461
chr2p23	GALNT14	0	0	0	0.490385	0.243243	0.366814	0.0192308	0.0945946	0.0569127	0	0	0	loss		-0.719675	-4.0926	-1.75082	-1.75082
chr2p23	CAPN14	0	0	0	0.495413	0.256757	0.376085	0.00917431	0.0945946	0.0518845	0	0	0	loss		-1.97411	-0.594961	-0.54515	-0.594961
chr2p23	EHD3	0	0	0	0.495413	0.256757	0.376085	0.00917431	0.0945946	0.0518845	0	0	0	loss		-7.00307	-7.26619	-4.24087	-7.00307
chr2p23	XDH	0	0	0	0.495413	0.256757	0.376085	0.0183486	0.0945946	0.0564716	0	0	0	loss		-0.384194	-3.42281	-1.65818	-1.65818
chr2p23	SRD5A2	0	0	0	0.490385	0.256757	0.373571	0.00961538	0.0945946	0.052105	0	0	0	loss		-1.88447	-2.62345	-1.3241	-1.88447
chr2p23	MEMO1	0	0	0	0.5	0.256757	0.378378	0.00961538	0.0945946	0.052105	0	0	0	loss		NA	-6.2658	-2.48817	-4.37699
chr2p22	DPY30	0	0	0	0.490385	0.256757	0.373571	0.00961538	0.0945946	0.052105	0	0	0	loss		2.35664	-1.10938	1.81404	1.81404
chr2p22	SPAST	0	0	0	0.485437	0.256757	0.371097	0.00970874	0.0945946	0.0521517	0	0	0	loss		-7.71043	-8.04325	-3.65165	-7.71043
chr2p22	SLC30A6	0	0	0	0.490385	0.256757	0.373571	0.00961538	0.0945946	0.052105	0	0	0	loss		-3.41354	-1.55148	-2.62102	-2.62102
chr2p22	NLRC4	0	0	0	0.490385	0.256757	0.373571	0.00961538	0.0945946	0.052105	0	0	0	loss		-3.48064	-3.35698	-3.94242	-3.48064
chr2p22	YIPF4	0	0	0	0.490385	0.256757	0.373571	0.00961538	0.0945946	0.052105	0	0	0	loss		-1.94048	-4.47118	-0.217665	-1.94048
chr2p22	BIRC6	0	0	0	0.485437	0.256757	0.371097	0.00970874	0.0945946	0.0521517	0	0	0	loss		-2.29837	0.314535	-1.69543	-1.69543
chr2p22	TTC27	0	0	0	0.518519	0.27027	0.394394	0.00925926	0.0945946	0.0519269	0	0	0	loss		-1.52555	-2.29364	-0.429433	-1.52555
chr2p22	LTBP1	0	0	0	0.509434	0.256757	0.383095	0.00943396	0.0945946	0.0520143	0	0	0	loss		3.55887	3.08258	1.10992	3.08258
chr2p22	RASGRP3	0	0.0135135	0.00675675	0.465347	0.256757	0.361052	0.00990099	0.0945946	0.0522478	0	0	0	loss		-4.39402	-1.25509	-6.67883	-4.39402
chr2p22	FAM98A	0	0	0	0.480769	0.256757	0.368763	0.00961538	0.0945946	0.052105	0	0	0	loss		-5.23603	-7.07922	-3.45534	-5.23603
chr2p22	CRIM1	0	0	0	0.504673	0.253333	0.379003	0.0186916	0.08	0.0493458	0.00934579	0	0.0046729	loss		0.772978	2.25646	1.45836	1.45836
chr2p22	FEZ2	0	0	0	0.490741	0.253333	0.372037	0.0185185	0.08	0.0492593	0.00925926	0	0.00462963	loss		-2.40066	-2.34199	0.139091	-2.34199
[truncated: 15,580 more rows]
